# Supplementary material for: The transcribed pseudogene RPSAP52 enhances the oncofetal HMGA2-IGF2BP2-RAS axis through LIN28B-dependent and independent let-7 inhibition
Source: PubMed Central journal article supplement (PMC6726650; doi:10.1038/s41467-019-11910-6), 2019-09-04
Supplement: 41467_2019_11910_MOESM3_ESM.pdf [file 41467_2019_11910_MOESM3_ESM.pdf]

## **Description of Additional Supplementary Files**

File Name: Supplementary Data 1

Description: This is an excel file with all significant peaks and CITS from the iCLIP-seq experiment in Figure 5.

File Name: Supplementary Data 2

Description: This is an excel file with all transcripts that are significantly altered in the expression arrays from Figure 7.
