# Supplementary material for: The transcribed pseudogene RPSAP52 enhances the oncofetal HMGA2-IGF2BP2-RAS axis through LIN28B-dependent and independent let-7 inhibition
Source: Springer Nature journal article supplement (doi:10.1038/s41467-019-11910-6), 2019-09-04
Supplement: MOESM1 [file 41467_2019_11910_MOESM1_ESM.pdf]

## Supplementary Information

The transcribed pseudogene *RPSAP52* enhances the oncofetal HMGA2-IGF2BP2-RAS axis through LIN28B-dependent and independent *let-7* inhibition

Oliveira-Mateos et al

**This document contains:**

- **Supplementary Figures 1-7.**
- **Supplementary Table 1. Oligos used in this work.**

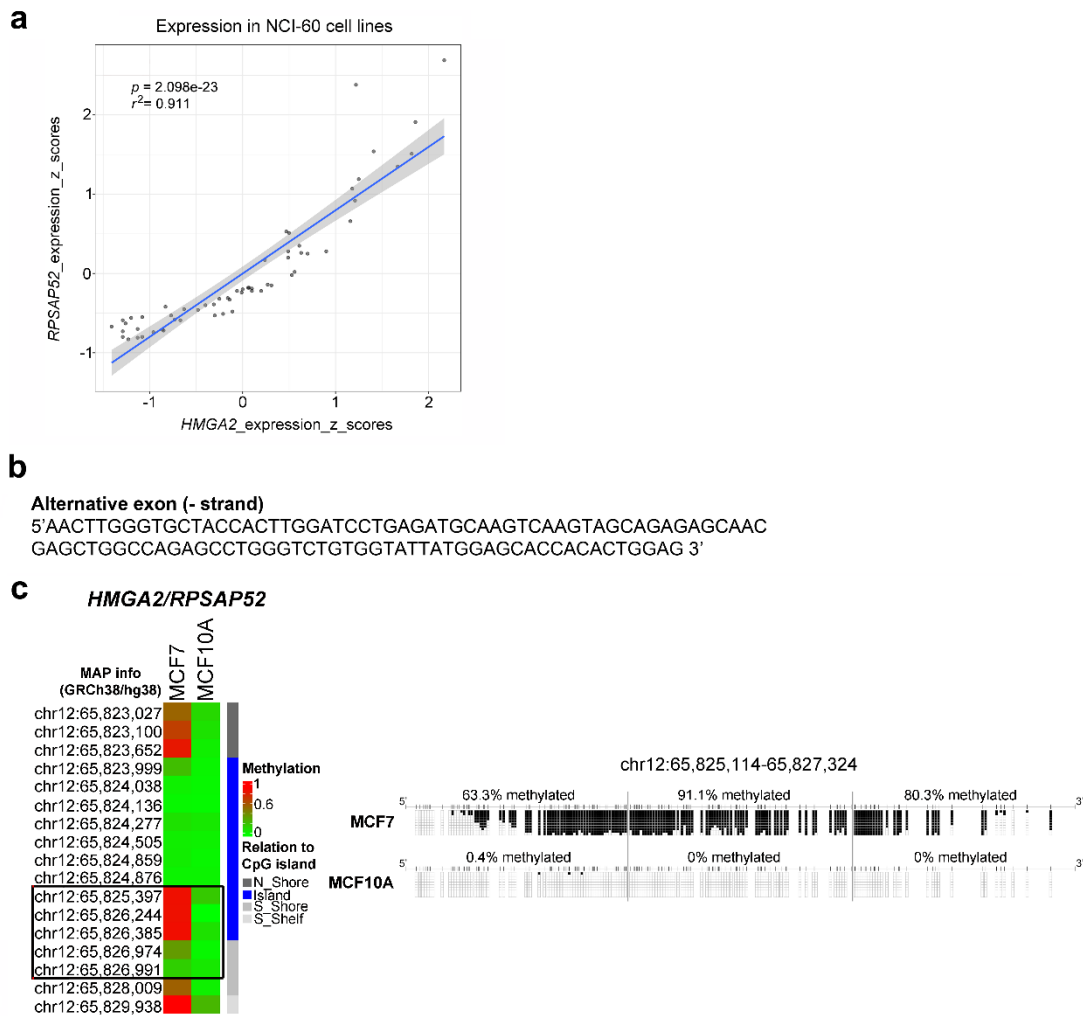

**Supplementary Fig. 1. Expression and methylation of the *HMGA2/RPSAP52* locus.**

**a** Correlation between *HMGA2* and *RPSAP52* in the NCI60 panel of cancer cell lines. Normalized expression array data (Z-score) are represented. R squared of Pearson correlation coefficient is shown. **b** The 104 nucleotides of *RPSAP52* alternative exon are indicated. **c** *Left*, heatmap representing methylation levels in MCF7 and MCF10A cell lines. The black square indicates the DNA region that was subject to sequencing following bisulfite treatment (*right*). 3 overlapping DNA fragments were analyzed, so that every CpG is interrogated between coordinates chr12:65,825,114 and chr12:65,827,324 (hg38). Vertical lines represent CpG positions along the whole sequence. Individual clones sequenced are represented horizontally, with empty squares corresponding to unmethylated CpGs and filled squares corresponding to methylated positions. Average methylation levels for each fragment are indicated. Source data for **c** are in Oliveira-Mateos et al\_Source Data 1.

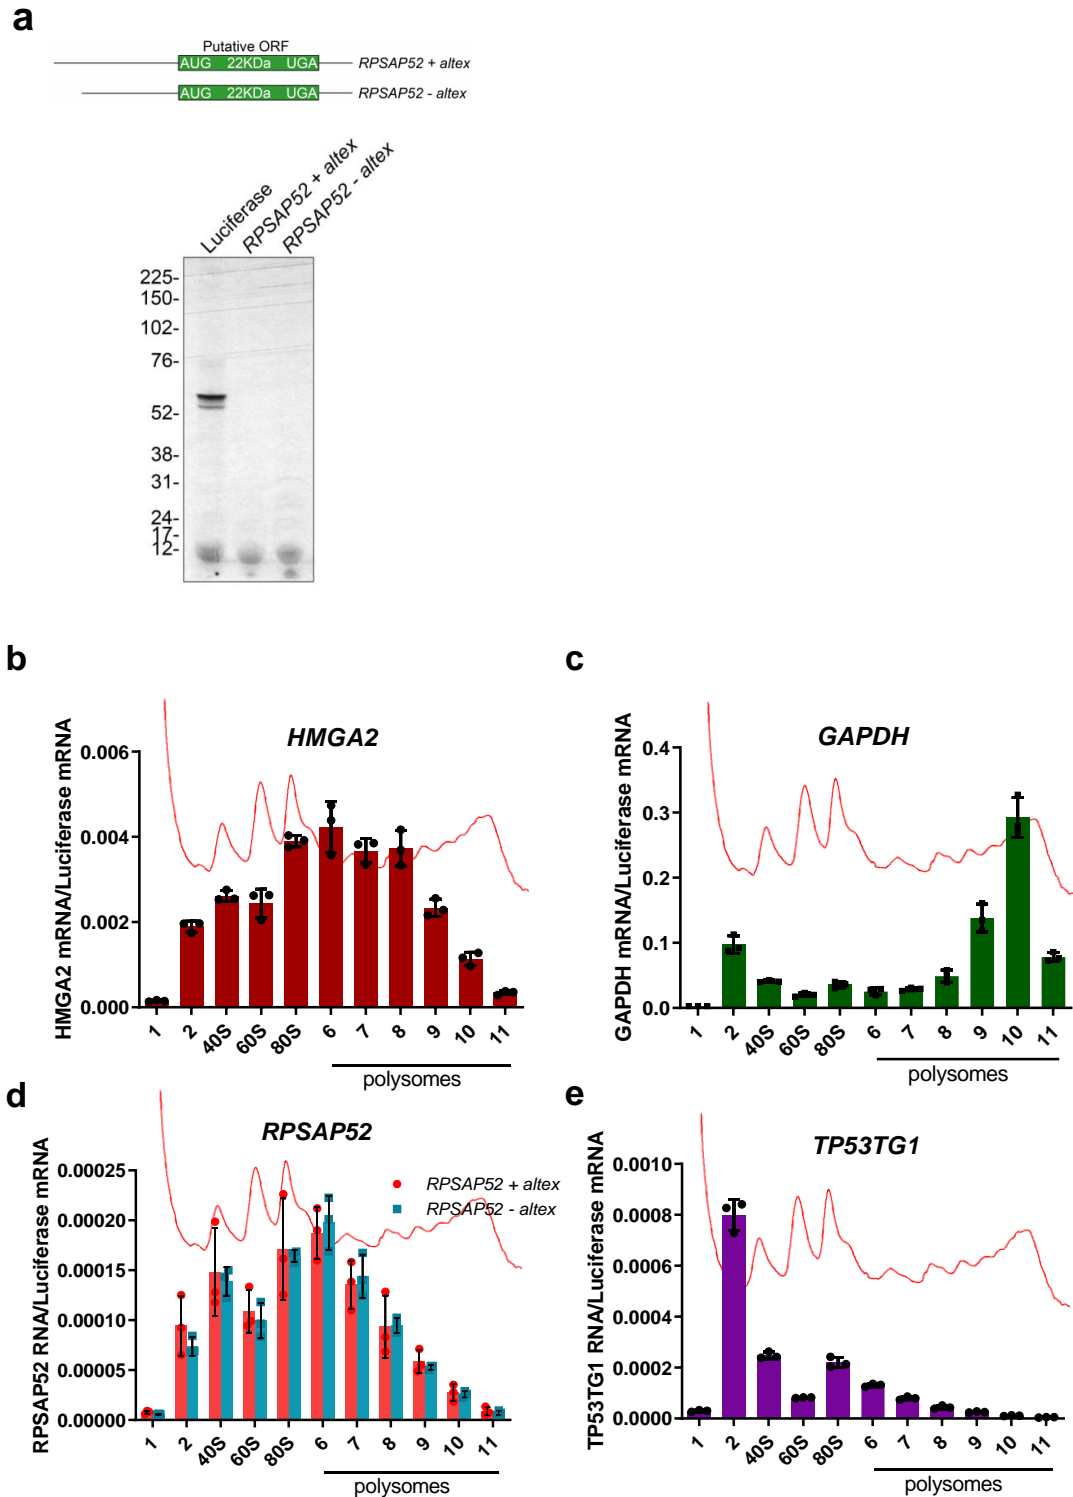

**Supplementary Fig. 2. RPSAP52 transcripts are associated with polysomes in MCF10A cells.** **a** Transcription/Translation assay to test the coding potential of RPSAP52. A DNA fragment corresponding to the Luciferase open reading frame was used as positive control. The transcripts corresponding to RPSAP52 + altex and RPSAP52 - altex isoforms were assayed (both have a predicted encoded protein of 22 kDa, as

indicated in the upper diagram). The molecular weight for Luciferase is 61 kDa. **b-e** Polysome distribution on a 10%-50% sucrose gradient from MCF10A wild-type cells. The presence of the indicated transcripts in each fraction was analyzed by RT-qPCR. *GAPDH* and *TP53TG1* were used for comparison since they represent an actively translated and a non-protein coding transcript, respectively. Data are means  $\pm$ SD, and error bars represent 3 replicates of RT-qPCR from each fraction. The red line indicates absorbance at 260 nm for each fraction. Source data for **b-e** are in Oliveira-Mateos et al\_Source Data 1. Unprocessed scans are available in Oliveira-Mateos et al\_Source Data 2.



in grey). The sequence of the alternative exon is highlighted in blue. **c** RT-qPCR analysis of the expression of *let-7* family members in MCF10A cells (left) and Hs578T (right). Abundance is expressed relative to *let-7a*. Data are means of at least three independent RNA extractions  $\pm$ SD. **d** Expression of the *RPSA* mRNA and the pseudogenes *RPSAP9* and *RPSAP58* upon knockdown of *RPSAP52*. Total RNA from MCF10A clones stably expressing shRNAs against *RPSAP52* was analyzed by RT-qPCR. Data are means of three independent RNA extractions  $\pm$ SD. **e** Western Blot to analyze RPSA levels upon *RPSAP52* depletion in MCF10A, Hs578T and A673 cell lines. **f** *LIN28A/B* expression in MCF10A cells. *Left*, mRNA relative expression as measured by RT-qPCR from 3 different RNA extractions. Data are means  $\pm$ SD; *right*, Western Blot of LIN28A protein. LIN28B protein is undetectable in MCF10A cells. **g** RNA and protein analysis of Hs578T clones stably expressing shRNA4 against *RPSAP52*. *Left*, RT-qPCR analysis of *HMGA2* and *RPSAP52* expression. Three different total RNA extractions were analyzed, and two-tailed student *t*-tests were used (\* $P$ <0.05, \*\* $P$ <0.01, \*\*\* $P$ <0.001, ns=not significant). Data are means  $\pm$ SD. *Middle*, RT-qPCR to assess *let-7* miRNAs levels. Six RT-qPCR analysis were performed from three different total RNA extractions, and two-tailed student *t*-tests were used (\* $P$ <0.05, \*\* $P$ <0.01, \*\*\* $P$ <0.001, ns=not significant). Data are means  $\pm$ SD. *Right (image)*, Western Blot to analyze IGF2BP2, total ERK and phosphorylated ERK (p-ERK) protein levels in the same clones. **h** RNA and protein analysis of HCC1143 clones stably expressing shRNA4 against *RPSAP52*. *Left*, RT-qPCR analysis of *HMGA2* and *RPSAP52* expression. Three different total RNA extractions were analyzed, and two-tailed student *t*-tests were used (\* $P$ <0.05, \*\* $P$ <0.01, ns=not significant). Data are means  $\pm$ SD. *Right (image)*, Western Blot to analyze IGF2BP2 protein levels. Source data for **c**, **d**, and **f-h** are in Oliveira-Mateos et al\_Source Data 1. Unprocessed scans are available in Oliveira-Mateos et al\_Source Data 2.

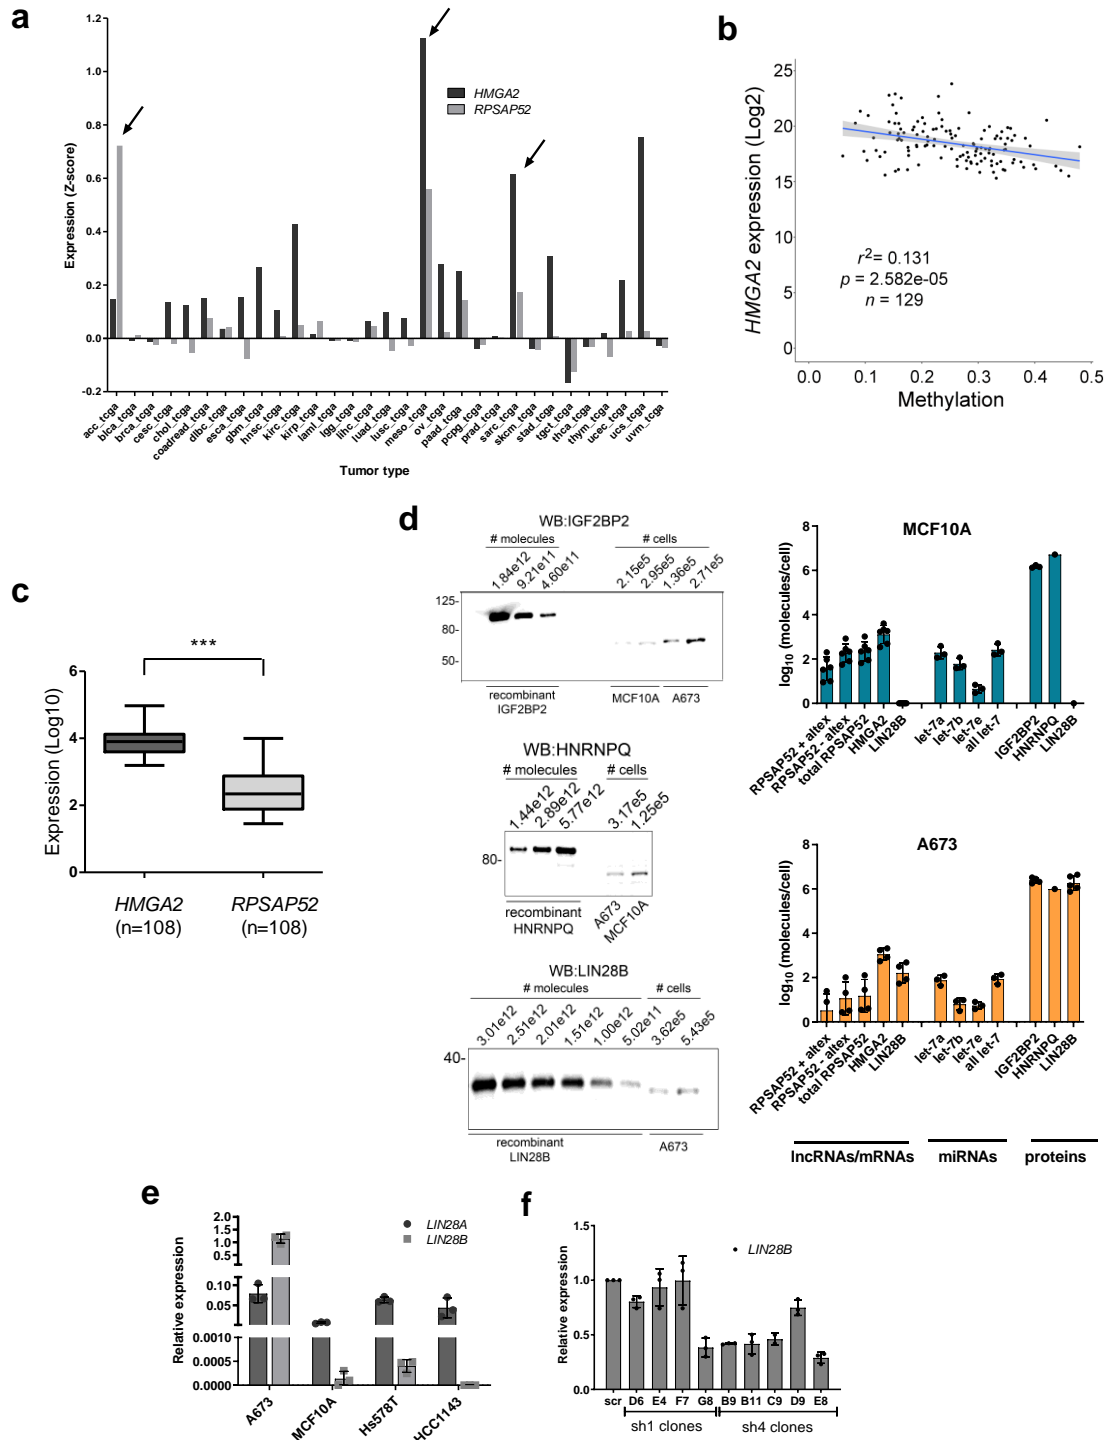

**Supplementary Fig. 4. Evaluation of relative and absolute abundance of the RNAs and proteins involved in the regulatory network. a** Z-score values for the expression of *HMGA2* and *RPSAP52* transcripts in all tumor types available at the TCGA database. Tumor types with the highest *RPSAP52* expression are indicated by an arrow. **b** *HMGA2* expression in the TCGA sarcoma cohort displays a weak negative correlation with the methylation of its associated CpG island, as measured by Pearson's coefficient. **c** Box

plots of *HMGA2* and *RPSAP52* relative expression levels in the TCGA cohort of sarcomas. Only patients with a recorded (non-zero) value for *RPSAP52* expression were considered. (\*\*\*) $P < 0.001$ , two-tailed Mann-Whitney U test). The central mark of the box plot indicates the median, and the bottom and top edges of the box indicate the interquartile range (IQR). The box plot whiskers represent the minimum and maximum of all of the data. **d** Absolute estimations of number of transcripts and proteins per cell. Recombinant proteins or *in vitro* transcribed templates of known amounts were used for comparison. *Left images*, increasing amounts of each recombinant protein were loaded onto SDS/PAGE gels together with total extracts from an exact number of MCF10A or A673 cells, as indicated, and blotted with the corresponding antibodies. Densitometry analysis of the Western Blot signal was used for absolute estimation. *Right graphs*, the number of molecules per cell ( $\log_{10}$ ) in each cell line is shown for RNAs (*RPSAP52*, *HMGA2* and *LIN28B*), *let-7* miRNAs and proteins (IGF2BP2, HNRNPQ and LIN28B). Data are means  $\pm$ SD, and error bars represent results from at least 2 different experiments (1 for HNRNPQ). **e** *LIN28A/B* mRNAs expression in the cell lines indicated. Relative expression was measured by RT-qPCR taking as a reference *LIN28B* levels in A673 cells. Data are means  $\pm$ SD, and error bars represent 3 replicates of RT-qPCR from different RNA extractions. **f** RT-qPCR analysis of *LIN28B* mRNA levels upon *RPSAP52* knockdown in A673 cells. Data are means  $\pm$ SD, and error bars represent 3 replicates of RT-qPCR. Source data for **d-f** are in Oliveira-Mateos et al\_Source Data 1. Unprocessed scans are available in Oliveira-Mateos et al\_Source Data 2.

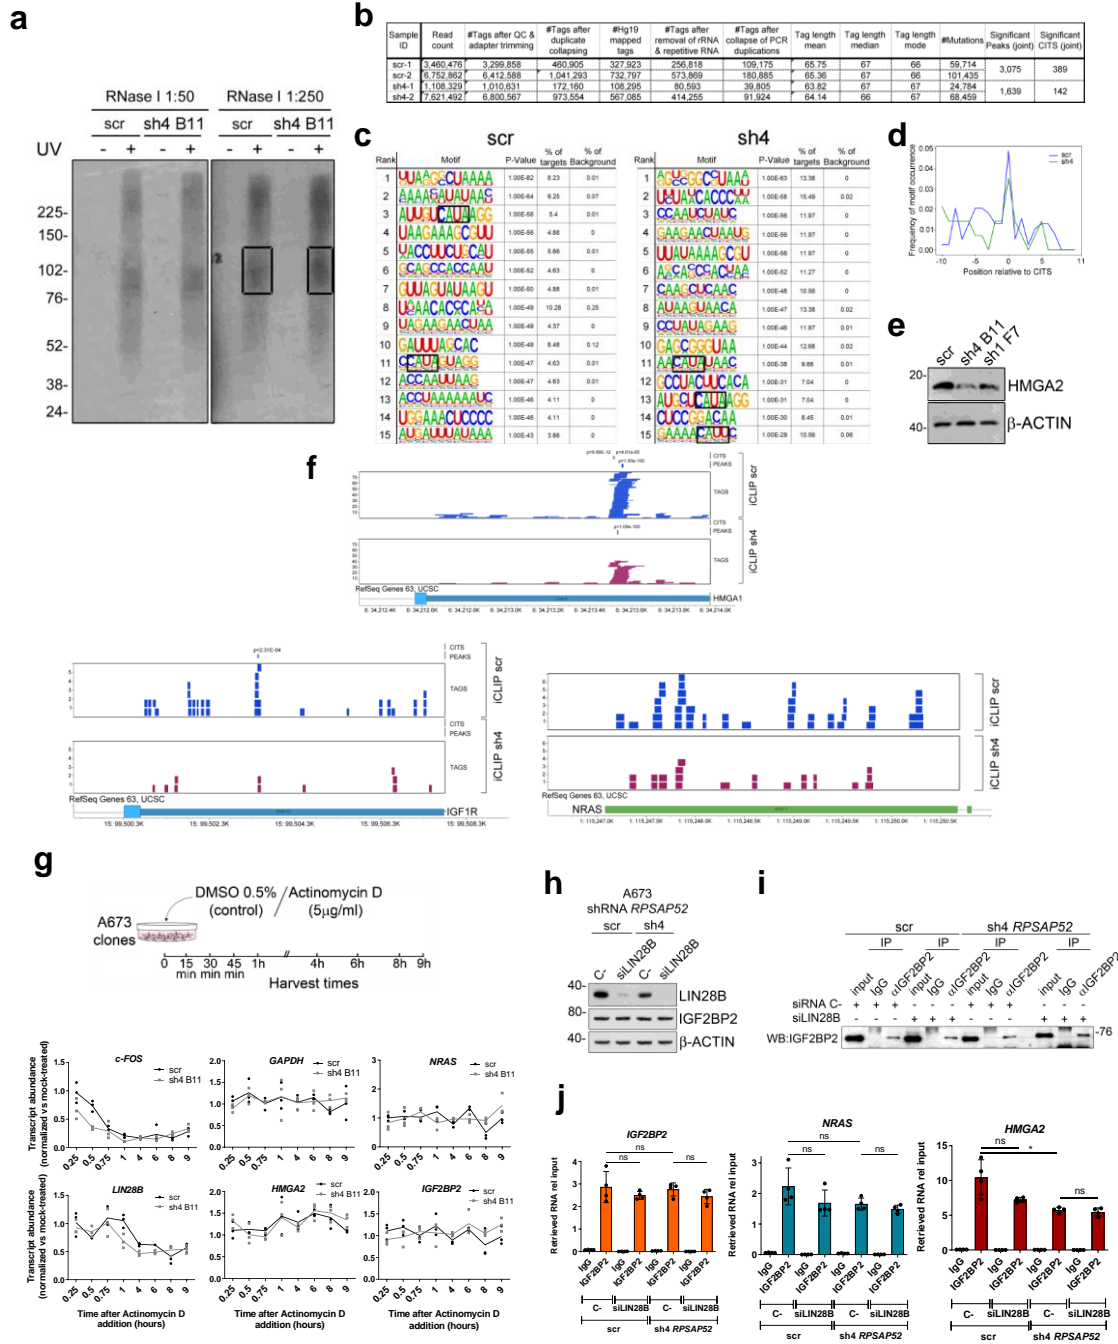

**Supplementary Fig. 5. iCLIP-seq experiment of IGF2BP2 in the context of *RPSAP52* depletion.** **a** Autoradiograph of IGF2BP2 iCLIP experiment in A673 cells expressing control shRNAs (scr) or the sh4 sequence against *RPSAP52* (sh4 B11). Two different concentrations of RNaseI were tested, and for each condition a –UV control was included. The excised RNA-protein bands are marked by the black squares. **b** iCLIP-seq experiment statistics. Results for each of the two experimental replicates for each condition are indicated. **c** Sequence logos of the IGF2BP2 RNA binding motif for each condition, generated by Homer analysis of all significant CITS positions (+/-10nts). The

CAUH motif is highlighted by the black squares. **d** Enrichment analysis of the CAUH motif within the iCLIP CITS identified for control (scr) or *RPSAP52*-depleted cells (sh4). **e** Western Blot to assess HMGA2 protein levels in control (scr) or *RPSAP52*-depleted (sh4 and sh1) A673 cells. **f** UCSC Genome Browser view of *HMGA1*, *IGF1R* and *NRAS* 3'UTR with the read coverage from IGF2BP2 iCLIP experiment. Results from control (scr) or *RPSAP52* (sh4) samples are shown. The position of statistically significant CITS and peaks are indicated. **g** RNA stability of IGF2BP2 targets upon *RPSAP52* knockdown. A673 control (scr) or *RPSAP52*-depleted cells (sh4 B11) were treated with 5µg/ml Actinomycin D or DMSO for the times indicated before harvesting, as indicated in the drawing. mRNA levels for each gene at each time-point were then assessed by RT-qPCR (graphs). Data are means ±SD, and error bars represent data from 3 independent Actinomycin D treatments. **h** Western Blot analysis of IGF2BP2 protein levels upon LIN28B depletion. Both control and *RPSAP52*-depleted A673 cells were subject to LIN28B depletion by means of siRNAs, as indicated. **i**, IGF2BP2 immunoprecipitation from the cells in (**h**) followed by Western Blot to assess IGF2BP2 pull-down. **j** RNA from 90% of the pull-down in (**i**) was extracted and analyzed by RT-qPCR. Identity of the genes analyzed are indicated in each graph. Data are means ±SD, and error bars represent the results from 4 replicates of RT-qPCR analysis (\* $P < 0.05$ , ns=not significant, two-tailed student *t*-test). Source data for **g** and **j** are in Oliveira-Mateos et al\_Source Data 1. Unprocessed scans are available in Oliveira-Mateos et al\_Source Data 2.

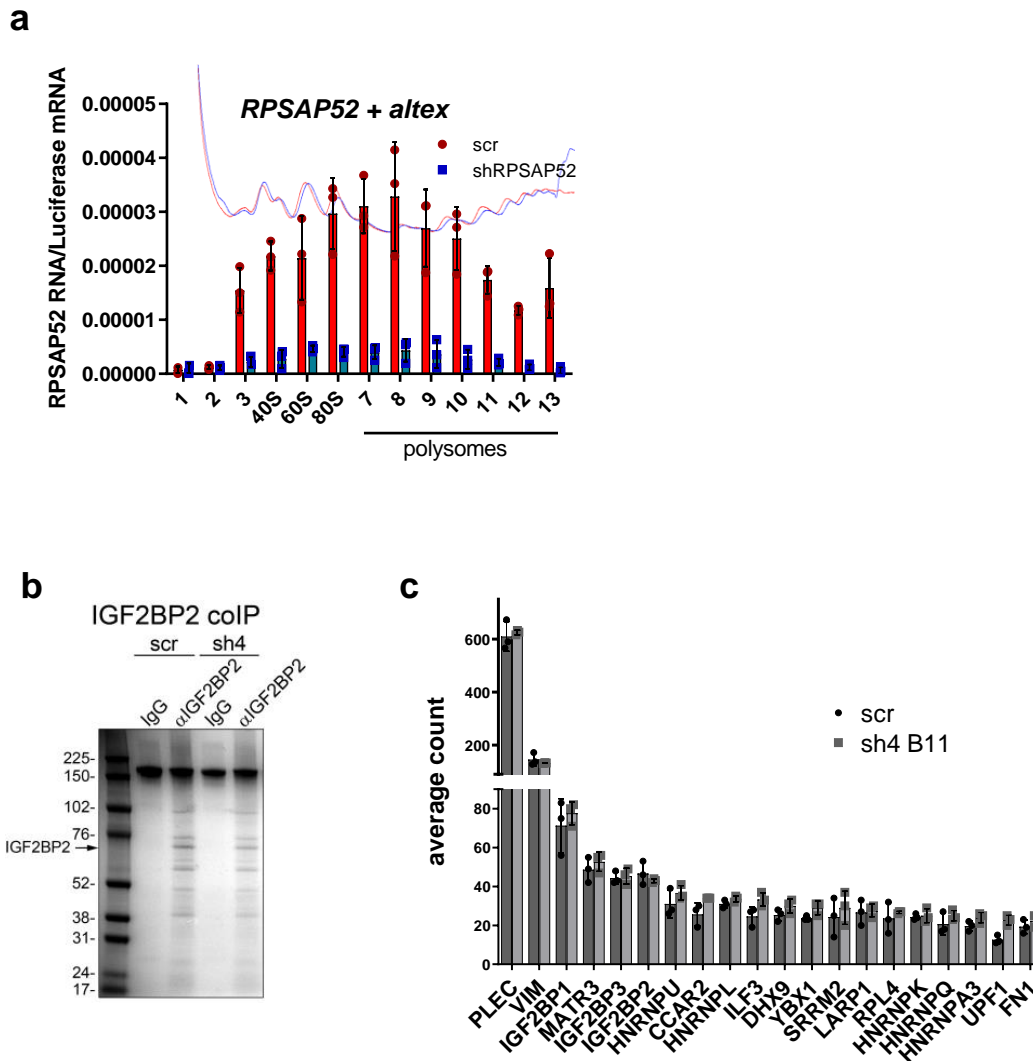

**Supplementary Fig. 6. RPSAP52 depletion does not change neither IGF2BP2 affinity for protein binding partners nor global translation efficiency.** **a** *RPSAP52 + altex* distribution across a polysome gradient in control (scr) or depleted (shRPSAP52) A673 cells. The presence of RNA in each fraction was analyzed by RT-qPCR. Data are means  $\pm$ SD, and error bars represent the results from 3 replicates of the RT-qPCR reaction. The red and blue lines indicate absorbance at 260 nm for each fraction in control or depleted cells, respectively. **b** Coomassie staining of a IGF2BP2 coimmunoprecipitation experiment in control and *RPSAP52*-depleted A673 cells (sh4). Mouse IgG was used as a negative control. **c** Average counts from the peptides eluted in 3 IGF2BP2 coimmunoprecipitation experiments. The first top 20 proteins with highest counts are represented. No statistical differences between conditions were found among the interactors with highest counts (BFDR=1 in all cases). Data are means  $\pm$ SD. Source data for **a** and **c** are in Oliveira-Mateos et al\_Source Data 1. Unprocessed scans are available in Oliveira-Mateos et al\_Source Data 2.

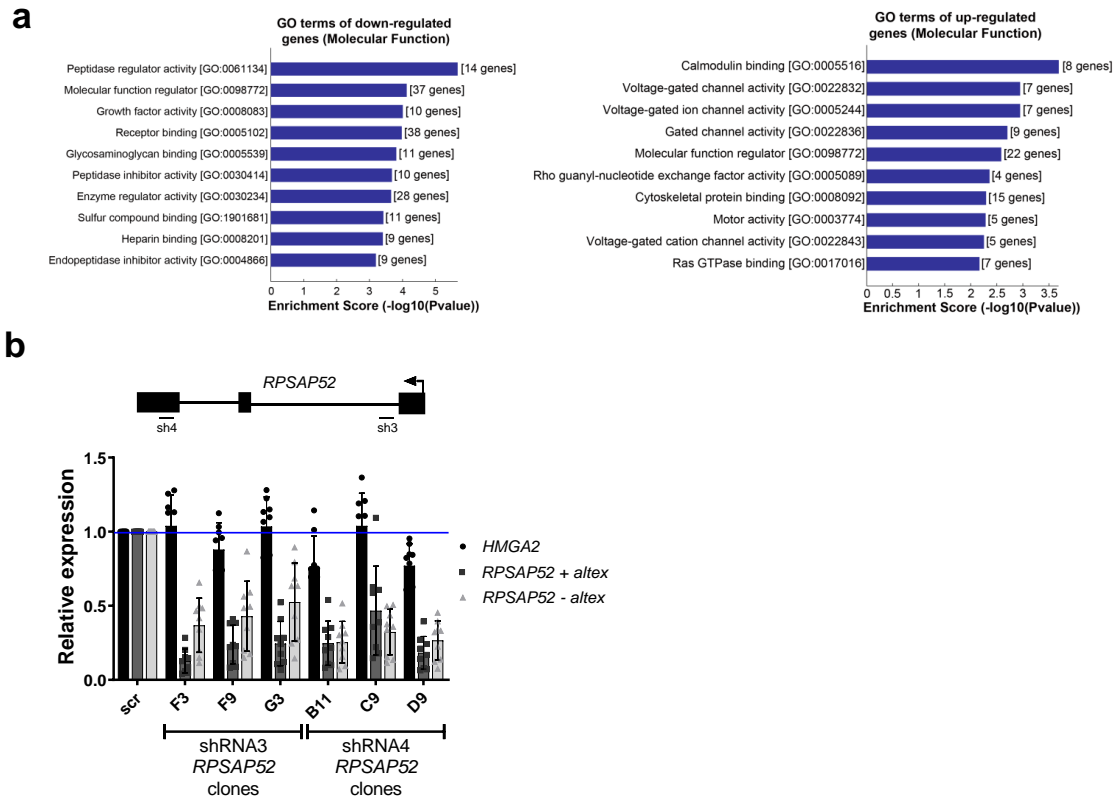

**Supplementary Fig. 7. Impact of *RPSAP52* and *LIN28B* depletion in A673 cells. a** Enriched GO terms for shRNA-*RPSAP52*-affected genes (two-tailed Fisher's exact test). The y axis shows Molecular Function terms and the x axis shows statistical significance. Enrichments for the down-regulated (left) or up-regulated (right) genes are shown. **b** *HMGA2* levels are not quantitatively altered upon *RPSAP52* knockdown with the sh3 and sh4 shRNA sequences. Location of the targeted regions on *RPSAP52* gene is indicated in the upper drawing. RT-qPCR assessment of *HMGA2* mRNA and *RPSAP52* transcripts is shown below. Data are means  $\pm$ SD from 3 RT-qPCR replicates. Source data for **b** are in Oliveira-Mateos et al\_Source Data 1.

**Supplementary Table 1. Oligos used in this work**

| Name               | Sequence 5' - 3'                                                 | Experiment                    |
|--------------------|------------------------------------------------------------------|-------------------------------|
| HMG2for            | CCTAAGAGACCCAGGGGAAG                                             | RT-qPCR/RT-PCR                |
| HMG2rev            | TCCAGTGGCTTCTGCTTCT                                              | RT-qPCR/RT-PCR                |
| RPSAP52for         | GAGCAACACATCGGAGACA                                              | RT-qPCR/RT-PCR                |
| RPSAP52rev         | AATTGGATTCCCACTGCAAG                                             | RT-PCR                        |
| RPSAP-altexrev     | CAGCTCGTTGCTCTCTGCTA                                             | RT-qPCR                       |
| RPSAP52for2        | ACTAGCACCAGTGGGCACAT                                             | RT-qPCR                       |
| RPSAP-altexrev     | CATGACAGGAATCTTIGAGTTAAG                                         | RT-qPCR                       |
| GUSBfor            | TGGTTGGAGAGCTCATTGGGA                                            | RT-qPCR                       |
| GUSBrev            | GCACTCTCGTCGGTGA CTGTT                                           | RT-qPCR                       |
| GAPDHfor           | TCTTCTTTTGCCTGCCAG                                               | RT-PCR                        |
| GAPDHrev           | AGCCCCAGCCTTCTCCA                                                | RT-PCR                        |
| GAPDHfor2          | TGCACCACCAACTGCTTAGC                                             | RT-qPCR                       |
| GAPDHrev2          | GGCATGGACTGTGGTCATGAG                                            | RT-qPCR                       |
| RNU6Bfor           | CTCGCTTCGGCAGCACA                                                | RT-qPCR                       |
| RNU6Brev           | AACGCTTCCAGAAATTTGCGT                                            | RT-qPCR                       |
| c-FOSfor           | CCGGGATAGCCTCTCTTACT                                             | RT-qPCR                       |
| c-FOSrev           | CCAGGTCCTGCAGAAAGTC                                              | RT-qPCR                       |
| IGF2BP2for         | AGCCTGTACCATCCATGC                                               | RT-qPCR/RT-PCR                |
| IGF2BP2rev         | CTTCGGCTAGTTGGTCTCATC                                            | RT-qPCR/RT-PCR                |
| NRASfor            | ATGACTGAGTACAACTGGTGGT                                           | RT-qPCR/RT-PCR                |
| NRASrev            | CATGTATTGGTCTCTCATGGCAC                                          | RT-qPCR/RT-PCR                |
| IGF1Rfor           | GGAATGAAGTCTGGCTCCG                                              | RT-qPCR                       |
| IGF1Rrev           | CAGCTGTGATAGTCGTTGC                                              | RT-qPCR                       |
| LIN28Afor          | CTTTGTGCACCAGAGTAAGC                                             | RT-qPCR                       |
| LIN28Arev          | GACCTTGGCTGACTTCTTA                                              | RT-qPCR                       |
| LIN28Bfor          | CATCTCCATGATAAACCCGAGAGG                                         | RT-qPCR/RT-PCR                |
| LIN28Brev          | GTTACCCTGATTGACTCAAGGC                                           | RT-qPCR/RT-PCR                |
| β-ACTINfor         | CATCCCAAAGACCTGTACG                                              | RT-qPCR                       |
| β-ACTINrev         | CCTGCTTGTGATCCACATC                                              | RT-qPCR                       |
| Flucfor            | ACAGATGCACATATCGAGGTG                                            | RT-qPCR                       |
| Flucrev            | GATTGTGATTCAGCCCATATCG                                           | RT-qPCR                       |
| TP53TG1for         | CTTTCCTTAACTCTCGGAGGC                                            | RT-qPCR                       |
| TP53TG1rev         | TGCAGCTCTCAGAGTCCTT                                              | RT-qPCR                       |
| MGST1for           | ATTTCATGGCTTTTGCATCC                                             | RT-qPCR                       |
| MGST1rev           | CTGCTACACGTTCTACTCTGTC                                           | RT-qPCR                       |
| CRABP1for          | AAAACCTACTGGACCCGTGA                                             | RT-qPCR                       |
| CRABP1rev          | GAAAGTAGGAGCAAGCCAGC                                             | RT-qPCR                       |
| CYR61for           | AACGAGGACTGCAGCAA                                                | RT-qPCR                       |
| CYR61rev           | CCCGTTTTGGTAGATTCTGG                                             | RT-qPCR                       |
| CD109for           | CCAAGATGCTTCAGTGTCC                                              | RT-qPCR                       |
| CD109rev           | CACAGGAGGACAGCTTAC                                               | RT-qPCR                       |
| PTPRZ1for          | TACTGGCCAAATAAAGATGAGC                                           | RT-qPCR                       |
| PTPRZ1rev          | TGCCTCACTCAAGTACATAATCA                                          | RT-qPCR                       |
| STYK1for           | CCTGGCTTTTTATCAGAGA                                              | RT-qPCR                       |
| STYK1rev           | AGGTCCTAGGTGGAGGA                                                | RT-qPCR                       |
| AREGfor            | AGCCGACTATGACTACTCAGAAGA                                         | RT-qPCR                       |
| AREGrev            | CACCTTCCGCTTGTGTTTGG                                             | RT-qPCR                       |
| CPT1Cfor           | TCAAAGAGTTGCTGCCTGA                                              | RT-qPCR                       |
| CPT1Crev           | CAGCCGTGGTAGGACAGA                                               | RT-qPCR                       |
| NPYfor             | CCTCATCACCAGGCAGAG                                               | RT-qPCR                       |
| NPYrev             | TGGGAACATTTCTGTGCTT                                              | RT-qPCR                       |
| MTSS1for           | ACCATCATCAGCGACATGA                                              | RT-qPCR                       |
| MTSS1rev           | GCCATGTACGCCACTTTCT                                              | RT-qPCR                       |
| TIAM1for           | TGGAGGCAAAAAGATTGTGTG                                            | RT-qPCR                       |
| TIAM1rev           | CCTCCTCCTCCCAAGAGACT                                             | RT-qPCR                       |
| MICBfor            | AAGAAAACATCAGCGGCAG                                              | RT-qPCR                       |
| MICBrev            | CATCCCTGTGGTCTCTGT                                               | RT-qPCR                       |
| RPSAfor            | TCATTTCTGCCGCTGT                                                 | RT-qPCR                       |
| RPSArev            | CATCCTCCTCCTCATTTGC                                              | RT-qPCR                       |
| RPSAP9for          | ACCCCAATCCATTTTATACC                                             | RT-qPCR                       |
| RPSAP9rev          | GGTCTTTTGTGGCTTGATAGC                                            | RT-qPCR                       |
| RPSAP58for         | TCTGGAGCGAGAAAAGAGC                                              | RT-qPCR                       |
| RPSAP58rev         | GGGTTATCCACCATCTCAT                                              | RT-qPCR                       |
| shRPSAP52-1for     | gatcGTCCTTAAGCTCCTTGCAGTTTCAAGAGAAGTCAAGGAGCTTAAGGATTTTTACGCGTg  | Gene silencing                |
| shRPSAP52-1rev     | aattcACGCGTAAAAATCTTAAGCTCCTTGCAGTTTCTTGAAGCTCAAGGAGCTTAAGGAGCg  | Gene silencing                |
| shRPSAP52-3for     | gatcGTGCAAGACTCAGGAGCTATTTCAAGAGATAGCTCCTGAGTCTTGACATTTTTACGCGTg | Gene silencing                |
| shRPSAP52-3rev     | aattcACGCGTAAAAAGTGAAGACTCAGGAGCTATCTTGAATAGCTCTGAGTCTTGACAGCg   | Gene silencing                |
| shRPSAP52-4for     | gatcGCACGGACTCTTAAGCAACATTCAGAGAGTGGTCTTGAAGAGTCCGCTTTTTTACGCGTg | Gene silencing                |
| shRPSAP52-4rev     | aattcACGCGTAAAAAACACGGACTCTTAAAGCAACATCTTGAAGTGGTCTTGAAGTCCGCTGg | Gene silencing                |
| bHMG2for1          | GGTAGTTAAAGTAATAGTAG                                             | Methylation analysis          |
| bHMG2for2          | AAATAAACTAATACCCCCAC                                             | Methylation analysis          |
| bHMG2for3          | GTGGGGTATTAGTTATTTT                                              | Methylation analysis          |
| bHMG2for4          | ACCCCAAACCTTAACCCC                                               | Methylation analysis          |
| bHMG2for5          | GGGGTAGAGTTTGGGGGT                                               | Methylation analysis          |
| bHMG2for6          | CAAACAAAACCTCCACTCC                                              | Methylation analysis          |
| bHMG2for7          | GGAGTGGAGGGTTTTGTTG                                              | Methylation analysis          |
| bHMG2for8          | AAACTCAAACCTCTAAATC                                              | Methylation analysis          |
| bHMG2for9          | TAGAGGTTTTTGTGTTTTT                                              | Methylation analysis          |
| bHMG2for10         | ATTAACCTAAAACCCATAAA                                             | Methylation analysis          |
| bHMG2for11         | AATTAGTTTTATTAATTAT                                              | Methylation analysis          |
| bHMG2for12         | TAAAAAATTTACTTAAATC                                              | Methylation analysis          |
| T7-RPSAP52for      | GAAATTAATACGACTCACTATAGGGGCATCCATTTAGAGAAT                       | In vitro biotin-transcription |
| RPSAP52-flrev      | ATCGATCGCTCGAGTTTGCATCACAGAATTT                                  | In vitro biotin-transcription |
| T7-antiRPSAP52for  | GAAATTAATACGACTCACTATAGGGTTTGCATCACAGAATTT                       | In vitro biotin-transcription |
| RPSAP52-flfor      | ATCGATCGCTCGAGGCACTCCATTTAGAGAAT                                 | In vitro biotin-transcription |
| T7-RPSAP52altexfor | GAAATTAATACGACTCACTATAGGGAAGTGGGTGCTACCCTTGGATCC                 | In vitro biotin-transcription |
| RPSAP52dom1rev     | CTTTAAGTCATGACAGGAATCT                                           | In vitro biotin-transcription |
| T7-RPSAP52dom2for  | GAAATTAATACGACTCACTATAGGGAGAACTTTCACAATGTCTGG                    | In vitro biotin-transcription |
| RPSAP52dom2rev     | GTGATGGCAATGTCCAATGG                                             | In vitro biotin-transcription |
| T7-RPSAP52dom3for  | GAAATTAATACGACTCACTATAGGGATGCAACAACAGGGAGCTCCC                   | In vitro biotin-transcription |
| RPSAP52dom3rev     | TTTGCATCACAGAATTTATTTTTA                                         | In vitro biotin-transcription |
| T7-RPSAP52for-TnT  | GAAATTAATACGACTCACTATAGGGGaggttccctgcaagctct                     | TnT assay                     |
| RPSAP52rev-TnT     | TTGCTTAAGAGTCCGTGCAA                                             | TnT assay                     |
