# Supplementary material for: The transcribed pseudogene RPSAP52 enhances the oncofetal HMGA2-IGF2BP2-RAS axis through LIN28B-dependent and independent let-7 inhibition
Source: Nat Commun. 2019 Sep 4;10:3979. doi: 10.1038/s41467-019-11910-6 (PMC6726650; doi:10.1038/s41467-019-11910-6)
Supplement: Supplementary file 4 — Supplementary Data 1 [file 41467_2019_11910_MOESM4_ESM.xlsx]

## Sheet: PEAKS scr
chr	start	end	Peak ID	#supporting tags	strand	adj.pval	Gene ID	Gene symbol	region
chr1	8414223	8414241	Peak_176	11	-	1.00e-100	473	RERE	3'UTR
chr1	10436906	10436932	Peak_4	33	+	1.00e-100	23095	KIF1B	3'UTR
chr1	23636590	23636592	Peak_189	12	-	1.00e-100	10236	HNRNPR	3'UTR
chr1	26227397	26227401	Peak_190	39	-	1.00e-100	3925	STMN1	3'UTR
chr1	32509217	32509226	Peak_32	10	+	1.00e-100	10657	KHDRBS1	3'UTR
chr1	36032266	36032277	Peak_35	19	+	1.00e-100	23154	NCDN	3'UTR
chr1	36386902	36386928	Peak_37	24	+	1.00e-100	26523	EIF2C1	3'UTR
chr1	43167862	43167880	Peak_42	23	+	1.00e-100	4904	YBX1	3'UTR
chr1	45116583	45116592	Peak_44	13	+	1.00e-100	55182	RNF220	3'UTR
chr1	51821224	51821237	Peak_204	14	-	1.00e-100	2060	EPS15	3'UTR
chr1	52253849	52253859	Peak_51	81	+	1.00e-100	114883	OSBPL9	3'UTR
chr1	52486149	52486156	Peak_207	11	-	1.00e-100	51060	TXNDC12	3'UTR
chr1	65299611	65299612	Peak_217	17	-	1.00e-100	3716	JAK1	3'UTR
chr1	75171284	75171300	Peak_227	9	-	1.00e-100	1429	CRYZ	3'UTR
chr1	85784942	85784952	Peak_229	8	-	1.00e-100	23576	DDAH1	3'UTR
chr1	87571108	87571112	Peak_69	12	+	1.00e-100	339524	LOC339524	3'UTR
chr1	87571108	87571112	Peak_71	12	+	1.00e-100	9653	HS2ST1	3'UTR
chr1	89301221	89301242	Peak_75	8	+	1.00e-100	5586	PKN2	3'UTR
chr1	120455869	120455879	Peak_254	9	-	1.00e-100	4853	NOTCH2	3'UTR
chr1	145116900	145116907	Peak_103	9	+	1.00e-100	9554	SEC22B	3'UTR
chr1	145116900	145116907	Peak_107	9	+	1.00e-100	9554	SEC22B	3'UTR
chr1	153779855	153779867	Peak_258	11	-	1.00e-100	57459	GATAD2B	3'UTR
chr1	153954348	153954369	Peak_260	25	-	1.00e-100	5872	RAB13	3'UTR
chr1	205687322	205687364	Peak_305	18	-	1.00e-100	64710	NUCKS1	3'UTR
chr1	206635230	206635232	Peak_154	13	+	1.00e-100	23380	SRGAP2	3'UTR
chr1	214522739	214522741	Peak_308	10	-	1.00e-100	5784	PTPN14	3'UTR
chr1	214524625	214524646	Peak_309	26	-	1.00e-100	5784	PTPN14	3'UTR
chr1	222842789	222842828	Peak_315	9	-	1.00e-100	64853	AIDA	3'UTR
chr1	245017149	245017151	Peak_332	27	-	1.00e-100	3192	HNRNPU	3'UTR
chr10	12871242	12871286	Peak_342	8	+	1.00e-100	57118	CAMK1D	3'UTR
chr10	18834748	18834805	Peak_412	11	-	1.00e-100	221078	NSUN6	3'UTR
chr10	63955401	63955414	Peak_427	13	-	1.00e-100	219790	RTKN2	3'UTR
chr10	65383007	65383036	Peak_359	15	+	1.00e-100	221035	REEP3	3'UTR
chr10	71161233	71161239	Peak_363	8	+	1.00e-100	3098	HK1	3'UTR
chr10	75009893	75009964	Peak_437	16	-	1.00e-100	51021	MRPS16	3'UTR
chr10	75878263	75878267	Peak_373	12	+	1.00e-100	7414	VCL	3'UTR
chr10	75878580	75878587	Peak_374	12	+	1.00e-100	7414	VCL	3'UTR
chr10	75878729	75878732	Peak_375	12	+	1.00e-100	7414	VCL	3'UTR
chr10	81073788	81073834	Peak_380	8	+	1.00e-100	57178	ZMIZ1	3'UTR
chr10	88684569	88684590	Peak_384	10	+	1.00e-100	657	BMPR1A	3'UTR
chr10	115670558	115670560	Peak_398	10	+	1.00e-100	374354	NHLRC2	3'UTR
chr11	10819189	10819190	Peak_586	24	-	1.00e-100	1982	EIF4G2	3'UTR
chr11	18429075	18429076	Peak_472	22	+	1.00e-100	3939	LDHA	3'UTR
chr11	34121733	34121750	Peak_487	17	+	1.00e-100	4076	CAPRIN1	3'UTR
chr11	34122299	34122318	Peak_489	16	+	1.00e-100	4076	CAPRIN1	3'UTR
chr11	34122561	34122590	Peak_490	15	+	1.00e-100	4076	CAPRIN1	3'UTR
chr11	44282303	44282310	Peak_596	12	-	1.00e-100	60529	ALX4	3'UTR
chr11	44955877	44955883	Peak_598	22	-	1.00e-100	9537	TP53I11	3'UTR
chr11	61568372	61568378	Peak_608	16	-	1.00e-100	3992	FADS1	3'UTR
chr11	63526455	63526478	Peak_523	12	+	1.00e-100	10313	RTN3	3'UTR
chr11	65622475	65622485	Peak_619	38	-	1.00e-100	1072	CFL1	3'UTR
chr11	69466542	69466544	Peak_539	49	+	1.00e-100	595	CCND1	3'UTR
chr11	69467558	69467561	Peak_540	530	+	1.00e-100	595	CCND1	3'UTR
chr11	69468646	69468656	Peak_541	42	+	1.00e-100	595	CCND1	3'UTR
chr11	102269494	102269508	Peak_641	14	-	1.00e-100	114908	TMEM123	3'UTR
chr11	110100539	110100548	Peak_645	13	-	1.00e-100	5962	RDX	3'UTR
chr11	110101124	110101133	Peak_646	13	-	1.00e-100	5962	RDX	3'UTR
chr11	110101452	110101480	Peak_647	11	-	1.00e-100	5962	RDX	3'UTR
chr11	110101573	110101585	Peak_648	16	-	1.00e-100	5962	RDX	3'UTR
chr11	120359182	120359184	Peak_566	9	+	1.00e-100	23365	ARHGEF12	3'UTR
chr12	6879902	6879908	Peak_673	32	+	1.00e-100	5763	PTMS	3'UTR
chr12	22839803	22839834	Peak_683	12	+	1.00e-100	55500	ETNK1	3'UTR
chr12	24965705	24965708	Peak_777	20	-	1.00e-100	586	BCAT1	3'UTR
chr12	44902116	44902129	Peak_783	9	-	1.00e-100	4753	NELL2	3'UTR
chr12	48438631	48438632	Peak_787	20	-	1.00e-100	29843	SENP1	3'UTR
chr12	50156857	50156871	Peak_690	17	+	1.00e-100	7009	TMBIM6	3'UTR
chr12	50158288	50158310	Peak_691	22	+	1.00e-100	7009	TMBIM6	3'UTR
chr12	56665651	56665692	Peak_802	12	-	1.00e-100	1431	CS	3'UTR
chr12	56665971	56665992	Peak_803	14	-	1.00e-100	1431	CS	3'UTR
chr12	57057897	57057921	Peak_805	12	-	1.00e-100	10728	PTGES3	3'UTR
chr12	66358082	66358132	Peak_710	12	+	1e-100	8091	HMGA2	3'UTR
chr12	66358611	66358614	Peak_712	15	+	1e-100	8091	HMGA2	3'UTR
chr12	66517319	66517341	Peak_811	8	-	1.00e-100	84298	LLPH	3'UTR
chr12	80168035	80168078	Peak_817	8	-	1.00e-100	4659	PPP1R12A	3'UTR
chr12	93803596	93803606	Peak_822	10	-	1.00e-100	7334	UBE2N	3'UTR
chr12	93897165	93897216	Peak_722	13	+	1.00e-100	28977	MRPL42	3'UTR
chr12	102792889	102792943	Peak_826	10	-	1.00e-100	3479	IGF1	3'UTR
chr12	106631747	106631784	Peak_827	30	-	1.00e-100	10970	CKAP4	3'UTR
chr12	112946096	112946104	Peak_745	14	+	1.00e-100	5781	PTPN11	3'UTR
chr12	124243074	124243081	Peak_762	9	+	1.00e-100	23545	ATP6V0A2	3'UTR
chr13	31034203	31034226	Peak_891	12	-	1.00e-100	3146	HMGB1	3'UTR
chr13	31034851	31034888	Peak_893	9	-	1.00e-100	3146	HMGB1	3'UTR
chr13	34410841	34410849	Peak_851	11	+	1.00e-100	5983	RFC3	3'UTR
chr13	39917750	39917751	Peak_900	147	-	1.00e-100	10186	LHFP	3'UTR
chr13	52335823	52335846	Peak_862	9	+	1.00e-100	115825	WDFY2	3'UTR
chr13	113977053	113977054	Peak_877	14	+	1.00e-100	3916	LAMP1	3'UTR
chr14	55532277	55532279	Peak_929	15	+	1.00e-100	93487	MAPK1IP1L	3'UTR
chr14	69846914	69846932	Peak_984	12	-	1.00e-100	2079	ERH	3'UTR
chr14	90871235	90871244	Peak_952	20	+	1.00e-100	801	CALM1	3'UTR
chr15	40328432	40328433	Peak_1073	40	-	1.00e-100	6727	SRP14	3'UTR
chr15	42823773	42823810	Peak_1019	18	+	1.00e-100	8773	SNAP23	3'UTR
chr15	45010174	45010182	Peak_1029	70	+	1.00e-100	567	B2M	3'UTR
chr15	45366609	45366623	Peak_1030	12	+	1.00e-100	6652	SORD	3'UTR
chr15	50569580	50569645	Peak_1081	9	-	1.00e-100	2553	GABPB1	3'UTR
chr15	52602052	52602068	Peak_1083	6	-	1.00e-100	4644	MYO5A	3'UTR
chr15	63556836	63556847	Peak_1042	9	+	1.00e-100	51762	RAB8B	3'UTR
chr15	65869798	65869808	Peak_1046	76	+	1.00e-100	51495	PTPLAD1	3'UTR
chr15	72491487	72491488	Peak_1105	22	-	1.00e-100	5315	PKM	3'UTR
chr15	91043674	91043675	Peak_1061	13	+	1.00e-100	8826	IQGAP1	3'UTR
chr16	4740624	4740638	Peak_1125	24	+	1.00e-100	23295	MGRN1	3'UTR
chr16	4854940	4854968	Peak_1224	18	-	1.00e-100	84656	GLYR1	3'UTR
chr16	24231001	24231006	Peak_1138	68	+	1.00e-100	5579	PRKCB	3'UTR
chr16	29821747	29821784	Peak_1146	13	+	1.00e-100	4150	MAZ	3'UTR
chr16	29821747	29821784	Peak_1151	13	+	1.00e-100	4150	MAZ	3'UTR
chr16	29821747	29821784	Peak_1166	13	+	1.00e-100	4150	MAZ	3'UTR
chr16	29821747	29821784	Peak_1171	13	+	1.00e-100	4150	MAZ	3'UTR
chr16	29822027	29822029	Peak_1148	9	+	1.00e-100	4150	MAZ	3'UTR
chr16	29822027	29822029	Peak_1153	9	+	1.00e-100	4150	MAZ	3'UTR
chr16	29822027	29822029	Peak_1168	9	+	1.00e-100	4150	MAZ	3'UTR
chr16	29822027	29822029	Peak_1173	9	+	1.00e-100	4150	MAZ	3'UTR
chr16	56395673	56395683	Peak_1258	17	-	1.00e-100	267	AMFR	3'UTR
chr16	69734880	69734913	Peak_1196	10	+	1.00e-100	10725	NFAT5	3'UTR
chr17	1248018	1248019	Peak_1348	39	-	1.00e-100	7531	YWHAE	3'UTR
chr17	1248595	1248617	Peak_1350	18	-	1.00e-100	7531	YWHAE	3'UTR
chr17	1325434	1325470	Peak_1354	15	-	1.00e-100	1398	CRK	3'UTR
chr17	2287893	2287912	Peak_1356	13	-	1.00e-100	4335	MNT	3'UTR
chr17	2585805	2585809	Peak_1290	11	+	1.00e-100	5048	PAFAH1B1	3'UTR
chr17	8378881	8378887	Peak_1364	9	-	1.00e-100	4628	MYH10	3'UTR
chr17	16344902	16344921	Peak_1303	30	+	1.00e-100	125144	C17orf76-AS1	3'UTR
chr17	30807992	30808023	Peak_1311	11	+	1.00e-100	5717	PSMD11	3'UTR
chr17	45760673	45760678	Peak_1315	46	+	1.00e-100	3837	KPNB1	3'UTR
chr17	48458890	48458901	Peak_1380	17	-	1.00e-100	55379	LRRC59	3'UTR
chr17	48459544	48459549	Peak_1381	14	-	1.00e-100	55379	LRRC59	3'UTR
chr17	49041914	49041954	Peak_1383	14	-	1.00e-100	9043	SPAG9	3'UTR
chr17	66527037	66527085	Peak_1334	11	+	1.00e-100	5573	PRKAR1A	3'UTR
chr18	3498951	3498964	Peak_1446	10	-	1.00e-100	9229	DLGAP1	3'UTR
chr18	9536468	9536510	Peak_1413	9	+	1.00e-100	10928	RALBP1	3'UTR
chr18	9536886	9536907	Peak_1414	9	+	1.00e-100	10928	RALBP1	3'UTR
chr18	51057875	51057933	Peak_1435	10	+	1.00e-100	1630	DCC	3'UTR
chr18	52890943	52890965	Peak_1464	9	-	1.00e-100	6925	TCF4	3'UTR
chr18	52892464	52892491	Peak_1466	9	-	1.00e-100	6925	TCF4	3'UTR
chr18	60998537	60998538	Peak_1475	102	-	1.00e-100	2531	KDSR	3'UTR
chr19	582975	582978	Peak_1477	74	+	1.00e-100	682	BSG	3'UTR
chr19	3464033	3464089	Peak_1494	13	+	1.00e-100	4782	NFIC	3'UTR
chr19	3465154	3465172	Peak_1495	16	+	1.00e-100	4782	NFIC	3'UTR
chr19	3468770	3468771	Peak_1496	25	+	1.00e-100	4782	NFIC	3'UTR
chr19	3976506	3976509	Peak_1568	43	-	1.00e-100	1938	EEF2	3'UTR
chr19	9964584	9964591	Peak_1576	18	-	1.00e-100	93145	OLFM2	3'UTR
chr19	12687598	12687644	Peak_1580	12	-	1.00e-100	57474	ZNF490	3'UTR
chr19	13054969	13054972	Peak_1502	29	+	1.00e-100	811	CALR	3'UTR
chr19	13055188	13055201	Peak_1503	34	+	1.00e-100	811	CALR	3'UTR
chr19	14625917	14625946	Peak_1582	11	-	1.00e-100	3337	DNAJB1	3'UTR
chr19	41812838	41812849	Peak_1536	23	+	1.00e-100	11100	HNRNPUL1	3'UTR
chr19	44047491	44047521	Peak_1593	14	-	1.00e-100	7515	XRCC1	3'UTR
chr19	44092013	44092066	Peak_1594	13	-	1.00e-100	126298	IRGQ	3'UTR
chr2	27170932	27170962	Peak_1614	16	+	1.00e-100	56896	DPYSL5	3'UTR
chr2	55199557	55199576	Peak_1738	15	-	1.00e-100	57142	RTN4	3'UTR
chr2	55516917	55516928	Peak_1739	14	-	1.00e-100	55704	CCDC88A	3'UTR
chr2	61705209	61705226	Peak_1744	11	-	1.00e-100	7514	XPO1	3'UTR
chr2	69473634	69473646	Peak_1639	10	+	1.00e-100	84168	ANTXR1	3'UTR
chr2	69474016	69474020	Peak_1640	14	+	1.00e-100	84168	ANTXR1	3'UTR
chr2	96851854	96851883	Peak_1759	13	-	1.00e-100	56910	STARD7	3'UTR
chr2	128063463	128063465	Peak_1767	12	-	1.00e-100	10746	MAP3K2	3'UTR
chr2	128620574	128620620	Peak_1769	10	-	1.00e-100	83607	AMMECR1L	3'UTR
chr2	131809047	131809065	Peak_1773	11	-	1.00e-100	130074	FAM168B	3'UTR
chr2	166538948	166538973	Peak_1679	12	+	1.00e-100	80034	CSRNP3	3'UTR
chr2	174090638	174090644	Peak_1683	10	+	1.00e-100	51776	ZAK	3'UTR
chr2	188330467	188330477	Peak_1797	11	-	1.00e-100	7035	TFPI	3'UTR
chr2	207945750	207945801	Peak_1805	24	-	1.00e-100	8609	KLF7	3'UTR
chr20	1349743	1349745	Peak_1864	17	-	1.00e-100	100528031	FKBP1A-SDCBP2	3'UTR
chr20	1349743	1349745	Peak_1867	17	-	1.00e-100	100528031	FKBP1A-SDCBP2	3'UTR
chr20	1350355	1350391	Peak_1866	9	-	1.00e-100	2280	FKBP1A	3'UTR
chr20	3628250	3628265	Peak_1838	12	+	1.00e-100	8455	ATRN	3'UTR
chr20	4835023	4835057	Peak_1870	8	-	1.00e-100	9962	SLC23A2	3'UTR
chr20	5975139	5975144	Peak_1841	31	+	1.00e-100	84515	MCM8	3'UTR
chr20	37206349	37206391	Peak_1853	9	+	1.00e-100	57148	RALGAPB	3'UTR
chr20	48697842	48697894	Peak_1887	10	-	1.00e-100	387522	TMEM189-UBE2V1	3'UTR
chr20	48699237	48699238	Peak_1889	10	-	1.00e-100	387522	TMEM189-UBE2V1	3'UTR
chr20	56939794	56939852	Peak_1859	12	+	1.00e-100	57403	RAB22A	3'UTR
chr21	27253082	27253101	Peak_1906	9	-	1.00e-100	351	APP	3'UTR
chr21	27253272	27253291	Peak_1907	9	-	1.00e-100	351	APP	3'UTR
chr21	27253647	27253666	Peak_1908	12	-	1.00e-100	351	APP	3'UTR
chr22	21242628	21242638	Peak_1922	20	+	1.00e-100	9342	SNAP29	3'UTR
chr22	30092066	30092144	Peak_1926	20	+	1.00e-100	4771	NF2	3'UTR
chr22	32081412	32081446	Peak_1952	11	-	1.00e-100	253143	PRR14L	3'UTR
chr22	35690817	35690819	Peak_1929	13	+	1.00e-100	10042	HMGXB4	3'UTR
chr22	36137383	36137423	Peak_1953	9	-	1.00e-100	23543	RBFOX2	3'UTR
chr22	36677649	36677683	Peak_1958	14	-	1.00e-100	4627	MYH9	3'UTR
chr22	36678112	36678138	Peak_1959	13	-	1.00e-100	4627	MYH9	3'UTR
chr22	38881365	38881366	Peak_1963	16	-	1.00e-100	10521	DDX17	3'UTR
chr22	39451380	39451461	Peak_1933	9	+	1.00e-100	60489	APOBEC3G	3'UTR
chr22	41575918	41575919	Peak_1937	34	+	1.00e-100	2033	EP300	3'UTR
chr3	33184147	33184149	Peak_1988	13	+	1.00e-100	10491	CRTAP	3'UTR
chr3	33184544	33184591	Peak_1989	15	+	1.00e-100	10491	CRTAP	3'UTR
chr3	38534269	38534317	Peak_1992	12	+	1.00e-100	93	ACVR2B	3'UTR
chr3	41281480	41281497	Peak_1996	11	+	1.00e-100	1499	CTNNB1	3'UTR
chr3	47627564	47627582	Peak_2053	13	-	1.00e-100	6599	SMARCC1	3'UTR
chr3	47629425	47629450	Peak_2058	11	-	1.00e-100	6599	SMARCC1	3'UTR
chr3	50296311	50296325	Peak_2003	14	+	1.00e-100	2771	GNAI2	3'UTR
chr3	88103112	88103136	Peak_2076	13	-	1.00e-100	8545	CGGBP1	3'UTR
chr3	115526914	115526954	Peak_2083	7	-	1.00e-100	4045	LSAMP	3'UTR
chr3	120114664	120114689	Peak_2086	14	-	1.00e-100	11167	FSTL1	3'UTR
chr3	122628097	122628143	Peak_2088	7	-	1.00e-100	54437	SEMA5B	3'UTR
chr3	124684975	124685001	Peak_2092	9	-	1.00e-100	57493	HEG1	3'UTR
chr3	128532434	128532443	Peak_2018	164	+	1.00e-100	7879	RAB7A	3'UTR
chr3	141645155	141645205	Peak_2021	10	+	1.00e-100	483	ATP1B3	3'UTR
chr3	156259474	156259479	Peak_2110	19	-	1.00e-100	6747	SSR3	3'UTR
chr3	179114599	179114630	Peak_2121	12	-	1.00e-100	59345	GNB4	3'UTR
chr3	186794798	186794823	Peak_2037	21	+	1.00e-100	6480	ST6GAL1	3'UTR
chr3	188604504	188604544	Peak_2038	20	+	1.00e-100	4026	LPP	3'UTR
chr3	189675241	189675289	Peak_2125	22	-	1.00e-100	55214	LEPREL1	3'UTR
chr3	189675455	189675462	Peak_2126	26	-	1.00e-100	55214	LEPREL1	3'UTR
chr3	196556260	196556271	Peak_2043	9	+	1.00e-100	5062	PAK2	3'UTR
chr4	1019478	1019491	Peak_2141	23	+	1.00e-100	53834	FGFRL1	3'UTR
chr4	1019627	1019633	Peak_2142	40	+	1.00e-100	53834	FGFRL1	3'UTR
chr4	27025095	27025115	Peak_2153	9	+	1.00e-100	57620	STIM2	3'UTR
chr4	31144747	31144775	Peak_2155	11	+	1.00e-100	5099	PCDH7	3'UTR
chr4	31146700	31146708	Peak_2158	10	+	1.00e-100	5099	PCDH7	3'UTR
chr4	56236603	56236635	Peak_2166	13	+	1.00e-100	79644	SRD5A3	3'UTR
chr4	77957136	77957148	Peak_2173	18	+	1.00e-100	55752	SEPT11	3'UTR
chr4	95588864	95588901	Peak_2179	9	+	1.00e-100	10611	PDLIM5	3'UTR
chr4	110970832	110970854	Peak_2236	17	-	1.00e-100	79071	ELOVL6	3'UTR
chr4	187132035	187132082	Peak_2205	9	+	1.00e-100	285440	CYP4V2	3'UTR
chr5	17276098	17276108	Peak_2266	214	+	1.00e-100	10409	BASP1	3'UTR
chr5	17276814	17276848	Peak_2267	14	+	1.00e-100	10409	BASP1	3'UTR
chr5	36035267	36035275	Peak_2397	31	-	1.00e-100	167127	UGT3A2	3'UTR
chr5	38479017	38479027	Peak_2399	12	-	1.00e-100	3977	LIFR	3'UTR
chr5	60841113	60841129	Peak_2280	21	+	1.00e-100	57688	ZSWIM6	3'UTR
chr5	72209838	72209866	Peak_2296	11	+	1.00e-100	3842	TNPO1	3'UTR
chr5	109203248	109203282	Peak_2314	10	+	1.00e-100	4124	MAN2A1	3'UTR
chr5	112213691	112213699	Peak_2418	51	-	1.00e-100	7905	REEP5	3'UTR
chr5	115781970	115781999	Peak_2423	7	-	1.00e-100	57556	SEMA6A	3'UTR
chr5	126172425	126172436	Peak_2320	11	+	1.00e-100	4001	LMNB1	3'UTR
chr5	130540180	130540207	Peak_2323	14	+	1.00e-100	90624	LYRM7	3'UTR
chr5	148875255	148875273	Peak_2442	12	-	1.00e-100	1452	CSNK1A1	3'UTR
chr5	149363940	149363971	Peak_2362	21	+	1.00e-100	1836	SLC26A2	3'UTR
chr5	150036986	150037021	Peak_2365	10	+	1.00e-100	11346	SYNPO	3'UTR
chr5	151041851	151041868	Peak_2445	38	-	1.00e-100	6678	SPARC	3'UTR
chr5	151042475	151042479	Peak_2446	31	-	1.00e-100	6678	SPARC	3'UTR
chr5	151042716	151042718	Peak_2447	159	-	1.00e-100	6678	SPARC	3'UTR
chr5	151183959	151183964	Peak_2366	17	+	1.00e-100	10146	G3BP1	3'UTR
chr5	179156310	179156312	Peak_2382	21	+	1.00e-100	821	CANX	3'UTR
chr5	179156553	179156564	Peak_2383	17	+	1.00e-100	821	CANX	3'UTR
chr5	179157023	179157030	Peak_2384	19	+	1.00e-100	821	CANX	3'UTR
chr5	179157325	179157328	Peak_2385	26	+	1.00e-100	821	CANX	3'UTR
chr5	179157620	179157621	Peak_2386	16	+	1.00e-100	821	CANX	3'UTR
chr6	7251732	7251776	Peak_2457	9	+	1.00e-100	6239	RREB1	3'UTR
chr6	7882059	7882060	Peak_2518	9	-	1.00e-100	100526836	MUTED-TXNDC5	3'UTR
chr6	34213591	34213598	Peak_2462	79	+	1e-100	3159	HMGA1	3'UTR
chr6	38644858	38644860	Peak_2538	15	-	1.00e-100	2739	GLO1	3'UTR
chr6	121769791	121769796	Peak_2491	16	+	1.00e-100	2697	GJA1	3'UTR
chr6	122765182	122765187	Peak_2568	14	-	1.00e-100	57515	SERINC1	3'UTR
chr6	133138420	133138434	Peak_2496	24	+	1.00e-100	6206	RPS12	3'UTR
chr6	133138420	133138434	Peak_2498	24	+	1.00e-100	6206	RPS12	3'UTR
chr6	145173370	145173400	Peak_2501	7	+	1.00e-100	7402	UTRN	3'UTR
chr6	157530007	157530028	Peak_2508	14	+	1.00e-100	57492	ARID1B	3'UTR
chr6	158929925	158929983	Peak_2511	9	+	1.00e-100	56995	TULP4	3'UTR
chr7	2702197	2702220	Peak_2587	33	+	1.00e-100	80727	TTYH3	3'UTR
chr7	2703930	2703964	Peak_2588	20	+	1.00e-100	80727	TTYH3	3'UTR
chr7	6501816	6501818	Peak_2693	14	-	1.00e-100	221955	DAGLB	3'UTR
chr7	10973189	10973196	Peak_2694	11	-	1.00e-100	4697	NDUFA4	3'UTR
chr7	65619178	65619270	Peak_2616	8	+	1.00e-100	27297	CRCP	3'UTR
chr7	75957922	75957925	Peak_2711	12	-	1.00e-100	7532	YWHAG	3'UTR
chr7	90838754	90838782	Peak_2629	11	+	1.00e-100	5218	CDK14	3'UTR
chr7	94296213	94296238	Peak_2631	19	+	1.00e-100	23089	PEG10	3'UTR
chr7	101893355	101893365	Peak_2634	8	+	1.00e-100	1523	CUX1	3'UTR
chr7	114658086	114658119	Peak_2640	10	+	1.00e-100	29969	MDFIC	3'UTR
chr7	116146628	116146630	Peak_2642	15	+	1.00e-100	858	CAV2	3'UTR
chr7	116146628	116146630	Peak_2645	15	+	1.00e-100	857	CAV1	3'UTR
chr7	116146904	116146939	Peak_2643	10	+	1.00e-100	858	CAV2	3'UTR
chr7	116147103	116147124	Peak_2644	22	+	1.00e-100	858	CAV2	3'UTR
chr7	116147103	116147124	Peak_2647	22	+	1.00e-100	858	CAV2	3'UTR
chr7	116199638	116199639	Peak_2648	25	+	1.00e-100	857	CAV1	3'UTR
chr7	116200014	116200022	Peak_2649	49	+	1.00e-100	857	CAV1	3'UTR
chr7	116200840	116200843	Peak_2650	99	+	1.00e-100	857	CAV1	3'UTR
chr7	137561088	137561101	Peak_2744	18	-	1.00e-100	64764	CREB3L2	3'UTR
chr7	137563666	137563700	Peak_2745	22	-	1.00e-100	64764	CREB3L2	3'UTR
chr7	148117828	148117860	Peak_2675	6	+	1.00e-100	26047	CNTNAP2	3'UTR
chr8	27661066	27661094	Peak_2771	44	+	1.00e-100	157570	ESCO2	3'UTR
chr8	38962197	38962206	Peak_2781	11	+	1.00e-100	8754	ADAM9	3'UTR
chr8	48889541	48889580	Peak_2788	16	+	1.00e-100	4173	MCM4	3'UTR
chr8	57873526	57873531	Peak_2836	17	-	1.00e-100	54928	IMPAD1	3'UTR
chr8	57875948	57875954	Peak_2837	13	-	1.00e-100	54928	IMPAD1	3'UTR
chr8	64123651	64123677	Peak_2792	9	+	1.00e-100	253943	YTHDF3	3'UTR
chr8	97156486	97156518	Peak_2850	19	-	1.00e-100	392255	GDF6	3'UTR
chr8	98737692	98737721	Peak_2801	10	+	1.00e-100	92140	MTDH	3'UTR
chr8	101931864	101931897	Peak_2861	18	-	1.00e-100	7534	YWHAZ	3'UTR
chr8	131064910	131064970	Peak_2873	17	-	1.00e-100	50807	ASAP1	3'UTR
chr9	94973022	94973030	Peak_2967	13	-	1.00e-100	3376	IARS	3'UTR
chr9	110092246	110092252	Peak_2923	12	+	1.00e-100	5887	RAD23B	3'UTR
chr9	114984868	114984902	Peak_2974	12	-	1.00e-100	100422990	MIR3134	3'UTR
chr9	114984868	114984902	Peak_2976	12	-	1.00e-100	9991	PTBP3	3'UTR
chr9	116022866	116022899	Peak_2926	34	+	1.00e-100	1317	SLC31A1	3'UTR
chr9	119161086	119161096	Peak_2928	9	+	1.00e-100	5069	PAPPA	3'UTR
chr9	119164148	119164155	Peak_2930	13	+	1.00e-100	5069	PAPPA	3'UTR
chr9	127998663	127998668	Peak_2986	19	-	1.00e-100	3309	HSPA5	3'UTR
chr9	131457056	131457064	Peak_2933	36	+	1.00e-100	6418	SET	3'UTR
chr9	133762689	133762739	Peak_2940	10	+	1.00e-100	25	ABL1	3'UTR
chrX	12841497	12841502	Peak_3000	16	+	1.00e-100	5634	PRPS2	3'UTR
chrX	68061205	68061223	Peak_3014	18	+	1.00e-100	1947	EFNB1	3'UTR
chrX	70520272	70520280	Peak_3015	20	+	1.00e-100	4841	NONO	3'UTR
chrX	78615970	78615973	Peak_3051	18	-	1.00e-100	9452	ITM2A	3'UTR
chrX	79931854	79931855	Peak_3054	22	-	1.00e-100	254065	BRWD3	3'UTR
chrX	132435958	132436023	Peak_3064	7	-	1.00e-100	2239	GPC4	3'UTR
chr2	152975634	152975656	Peak_1779	5	-	1.01e-02	10254	STAM2	3'UTR
chr11	102267465	102267495	Peak_638	7	-	1.01e-03	114908	TMEM123	3'UTR
chr11	102268115	102268141	Peak_640	7	-	1.01e-03	114908	TMEM123	3'UTR
chr1	87575122	87575182	Peak_73	6	+	1.01e-04	339524	LOC339524	3'UTR
chr1	112255691	112255729	Peak_91	5	+	1.01e-04	5906	RAP1A	3'UTR
chr18	74072825	74072851	Peak_1476	5	-	1.01e-04	9658	ZNF516	3'UTR
chr5	127593707	127593719	Peak_2426	4	-	1.01e-04	2201	FBN2	3'UTR
chr1	32639928	32639934	Peak_34	8	+	1.01e-05	23633	KPNA6	3'UTR
chr14	99638722	99638747	Peak_1000	10	-	1.01e-07	64919	BCL11B	3'UTR
chr7	5645280	5645308	Peak_2594	10	+	1.02e-03	6624	FSCN1	3'UTR
chr1	40537968	40537991	Peak_40	7	+	1.02e-04	10487	CAP1	3'UTR
chr12	121135398	121135442	Peak_757	13	+	1.02e-07	9761	MLEC	3'UTR
chr1	2335113	2335167	Peak_1	6	+	1.03e-02	11079	RER1	3'UTR
chr1	20237895	20237945	Peak_9	5	+	1.03e-02	23252	OTUD3	3'UTR
chr12	122692690	122692706	Peak_843	5	-	1.03e-03	65082	VPS33A	3'UTR
chr19	49425879	49425910	Peak_1545	6	+	1.03e-03	4924	NUCB1	3'UTR
chr2	212244434	212244464	Peak_1808	6	-	1.03e-03	2066	ERBB4	3'UTR
chr5	140892220	140892238	Peak_2358	7	+	1.03e-03	56098	PCDHGC4	3'UTR
chr2	183643150	183643182	Peak_1690	8	+	1.03e-07	54431	DNAJC10	3'UTR
chr9	119162373	119162403	Peak_2929	8	+	1.03e-07	5069	PAPPA	3'UTR
chr1	113213449	113213457	Peak_94	13	+	1.03e-09	829	CAPZA1	3'UTR
chr1	113213561	113213585	Peak_95	11	+	1.03e-09	829	CAPZA1	3'UTR
chr16	10625617	10625619	Peak_1225	11	-	1.03e-09	2013	EMP2	3'UTR
chr3	49396729	49396737	Peak_2062	9	-	1.04e-09	387	RHOA	3'UTR
chr3	49396863	49396869	Peak_2063	9	-	1.04e-09	387	RHOA	3'UTR
chr1	210337209	210337225	Peak_156	6	+	1.05e-03	255928	SYT14	3'UTR
chr5	133308066	133308099	Peak_2429	6	-	1.05e-03	7416	VDAC1	3'UTR
chr1	225977252	225977271	Peak_159	9	+	1.05e-04	6726	SRP9	3'UTR
chr7	139257352	139257378	Peak_2746	4	-	1.05e-04	28996	HIPK2	3'UTR
chr8	95441621	95441649	Peak_2848	6	-	1.05e-05	25788	RAD54B	3'UTR
chr1	120455519	120455540	Peak_253	7	-	1.05e-06	4853	NOTCH2	3'UTR
chr20	60514490	60514557	Peak_1862	5	+	1.06e-03	1002	CDH4	3'UTR
chr7	6203818	6203898	Peak_2688	6	-	1.06e-05	9265	CYTH3	3'UTR
chr1	16450871	16450903	Peak_180	7	-	1.06e-06	1969	EPHA2	3'UTR
chr4	107843363	107843366	Peak_2233	6	-	1.06e-06	27123	DKK2	3'UTR
chr6	159186886	159186919	Peak_2580	12	-	1.06e-09	7430	EZR	3'UTR
chr6	159187333	159187340	Peak_2581	12	-	1.06e-09	7430	EZR	3'UTR
chr17	7215363	7215373	Peak_1293	16	+	1.06e-10	1984	EIF5A	3'UTR
chr6	133137947	133137994	Peak_2497	13	+	1.07e-02	6206	RPS12	3'UTR
chrX	123235916	123235956	Peak_3028	5	+	1.07e-02	10735	STAG2	3'UTR
chr2	27170734	27170771	Peak_1613	6	+	1.07e-03	56896	DPYSL5	3'UTR
chr3	120501544	120501601	Peak_2015	6	+	1.07e-06	2960	GTF2E1	3'UTR
chr11	12964429	12964480	Peak_469	8	+	1.07e-08	7003	TEAD1	3'UTR
chr2	99815410	99815459	Peak_1657	7	+	1.07e-08	51263	MRPL30	3'UTR
chr11	27518477	27518505	Peak_594	9	-	1.08e-02	55327	LIN7C	3'UTR
chr19	16212447	16212451	Peak_1510	8	+	1.08e-03	7171	TPM4	3'UTR
chr19	16213556	16213566	Peak_1511	8	+	1.08e-03	7171	TPM4	3'UTR
chr5	102365329	102365336	Peak_2311	6	+	1.08e-03	5066	PAM	3'UTR
chr9	123366131	123366193	Peak_2979	5	-	1.08e-03	1955	MEGF9	3'UTR
chr1	110135460	110135472	Peak_88	7	+	1.08e-04	2773	GNAI3	3'UTR
chr11	118622116	118622138	Peak_655	9	-	1.08e-05	1656	DDX6	3'UTR
chr9	132650935	132650943	Peak_2988	8	-	1.08e-06	23048	FNBP1	3'UTR
chr3	9798665	9798723	Peak_1975	5	+	1.09e-02	4968	OGG1	3'UTR
chr7	2767747	2767796	Peak_2682	5	-	1.09e-02	2768	GNA12	3'UTR
chr8	77779228	77779255	Peak_2796	4	+	1.09e-02	79776	ZFHX4	3'UTR
chr14	67801518	67801565	Peak_938	6	+	1.09e-03	64398	MPP5	3'UTR
chr19	17452858	17452925	Peak_1513	6	+	1.10e-02	84705	GTPBP3	3'UTR
chr4	141542835	141542872	Peak_2247	4	-	1.10e-02	23158	TBC1D9	3'UTR
chr5	175936310	175936350	Peak_2379	7	+	1.10e-05	23197	FAF2	3'UTR
chr8	54959727	54959733	Peak_2835	11	-	1.10e-09	10434	LYPLA1	3'UTR
chr5	140892220	140892238	Peak_2351	7	+	1.11e-05	56104	PCDHGB1	3'UTR
chr4	141303260	141303307	Peak_2189	4	+	1.13e-03	60592	SCOC	3'UTR
chr2	85547156	85547188	Peak_1755	10	-	1.13e-04	10618	TGOLN2	3'UTR
chr17	79525319	79525382	Peak_1405	7	-	1.13e-05	55666	NPLOC4	3'UTR
chr4	154257218	154257266	Peak_2196	6	+	1.13e-05	23321	TRIM2	3'UTR
chr1	44443848	44443879	Peak_43	8	+	1.14e-02	533	ATP6V0B	3'UTR
chr12	6647498	6647499	Peak_672	12	+	1.14e-03	2597	GAPDH	3'UTR
chr5	918019	918026	Peak_2262	9	+	1.14e-08	9319	TRIP13	3'UTR
chr6	73907321	73907341	Peak_2482	29	+	1.14e-08	56479	KCNQ5	3'UTR
chr17	65977757	65977777	Peak_1332	5	+	1.15e-02	2186	BPTF	3'UTR
chr12	124498434	124498445	Peak_764	5	+	1.15e-03	100533183	ZNF664-FAM101A	3'UTR
chr18	52892115	52892161	Peak_1465	6	-	1.16e-04	6925	TCF4	3'UTR
chr6	36456751	36456773	Peak_2466	7	+	1.16e-04	222658	KCTD20	3'UTR
chr19	41812700	41812704	Peak_1535	9	+	1.16e-05	11100	HNRNPUL1	3'UTR
chr12	79843733	79843760	Peak_720	9	+	1.16e-08	6857	SYT1	3'UTR
chr12	79843900	79843918	Peak_721	11	+	1.16e-08	6857	SYT1	3'UTR
chr17	57189377	57189405	Peak_1389	9	-	1.16e-08	348235	SKA2	3'UTR
chr14	102547634	102547638	Peak_1003	13	-	1.16e-09	3320	HSP90AA1	3'UTR
chr14	55531750	55531783	Peak_928	8	+	1.17e-02	93487	MAPK1IP1L	3'UTR
chr10	79550906	79550925	Peak_438	5	-	1.17e-03	9231	DLG5	3'UTR
chr1	205686047	205686067	Peak_303	14	-	1.17e-06	64710	NUCKS1	3'UTR
chr11	57584079	57584093	Peak_508	6	+	1.18e-02	100528016	TMX2-CTNND1	3'UTR
chr12	97347091	97347119	Peak_723	5	+	1.18e-02	121441	NEDD1	3'UTR
chr16	58741211	58741260	Peak_1260	5	-	1.18e-02	2806	GOT2	3'UTR
chr17	27957711	27957714	Peak_1373	5	-	1.18e-02	85464	SSH2	3'UTR
chr19	16243951	16243995	Peak_1512	6	+	1.18e-05	4218	RAB8A	3'UTR
chr11	32126226	32126261	Peak_475	4	+	1.19e-02	5954	RCN1	3'UTR
chr17	47131129	47131165	Peak_1318	8	+	1.19e-02	10642	IGF2BP1	3'UTR
chr12	117646692	117646699	Peak_838	6	-	1.19e-06	4842	NOS1	3'UTR
chr7	128410107	128410126	Peak_2657	11	+	1.19e-06	813	CALU	3'UTR
chr3	107526614	107526651	Peak_2012	4	+	1.20e-02	56987	BBX	3'UTR
chr16	1749610	1749629	Peak_1119	7	+	1.20e-03	90861	HN1L	3'UTR
chr16	67209975	67210044	Peak_1268	6	-	1.20e-04	653319	KIAA0895L	3'UTR
chr10	88494815	88494871	Peak_383	5	+	1.20e-06	11155	LDB3	3'UTR
chr11	126133545	126133582	Peak_661	14	-	1.20e-10	6734	SRPR	3'UTR
chr2	136542020	136542071	Peak_1673	6	+	1.21e-02	23190	UBXN4	3'UTR
chr2	16732346	16732350	Peak_1722	7	-	1.21e-05	81553	FAM49A	3'UTR
chr1	60339959	60339962	Peak_56	19	+	1.21e-09	51361	HOOK1	3'UTR
chr1	60340670	60340671	Peak_57	31	+	1.21e-09	51361	HOOK1	3'UTR
chr3	128338985	128339040	Peak_2095	8	-	1.21e-09	6184	RPN1	3'UTR
chr11	27370479	27370482	Peak_593	5	-	1.22e-02	91057	CCDC34	3'UTR
chr1	10480085	10480099	Peak_5	6	+	1.22e-03	5226	PGD	3'UTR
chr13	31711129	31711149	Peak_896	10	-	1.22e-08	10808	HSPH1	3'UTR
chr17	53470989	53471009	Peak_1385	6	-	1.23e-04	23531	MMD	3'UTR
chr4	169909732	169909773	Peak_2258	5	-	1.23e-04	84869	CBR4	3'UTR
chr4	169909936	169909975	Peak_2259	5	-	1.23e-04	84869	CBR4	3'UTR
chr1	61922298	61922342	Peak_60	7	+	1.23e-05	4774	NFIA	3'UTR
chr7	23350738	23350744	Peak_2700	7	-	1.23e-05	10643	IGF2BP3	3'UTR
chr11	65119419	65119434	Peak_525	8	+	1.23e-06	5977	DPF2	3'UTR
chr11	47639684	47639714	Peak_606	5	-	1.24e-03	23788	MTCH2	3'UTR
chr12	52389110	52389131	Peak_699	6	+	1.24e-03	91	ACVR1B	3'UTR
chr3	196198023	196198075	Peak_2138	6	-	1.24e-03	165918	RNF168	3'UTR
chr7	75958143	75958175	Peak_2712	10	-	1.24e-06	7532	YWHAG	3'UTR
chr7	75958300	75958318	Peak_2713	10	-	1.24e-06	7532	YWHAG	3'UTR
chr7	75958535	75958536	Peak_2714	10	-	1.24e-06	7532	YWHAG	3'UTR
chr5	154194265	154194286	Peak_2369	10	+	1.24e-08	23367	LARP1	3'UTR
chr4	177249963	177249964	Peak_2204	9	+	1.25e-02	60559	SPCS3	3'UTR
chr12	110784398	110784415	Peak_740	9	+	1.25e-05	488	ATP2A2	3'UTR
chr16	18803383	18803425	Peak_1228	11	-	1.25e-05	23204	ARL6IP1	3'UTR
chr16	29821747	29821784	Peak_1175	13	+	1.25e-05	4150	MAZ	3'UTR
chr17	57187646	57187655	Peak_1388	8	-	1.25e-06	348235	SKA2	3'UTR
chr2	187544546	187544573	Peak_1692	8	+	1.25e-08	3685	ITGAV	3'UTR
chr2	219118878	219118890	Peak_1701	8	+	1.25e-08	10109	ARPC2	3'UTR
chr11	9467227	9467229	Peak_464	12	+	1.25e-09	10527	IPO7	3'UTR
chr16	87864016	87864018	Peak_1281	10	-	1.26e-02	8140	SLC7A5	3'UTR
chr17	56082378	56082396	Peak_1386	13	-	1.26e-02	6426	SRSF1	3'UTR
chr19	19618595	19618639	Peak_1517	6	+	1.26e-02	54815	GATAD2A	3'UTR
chr7	6501563	6501589	Peak_2690	7	-	1.26e-04	11014	KDELR2	3'UTR
chr7	148114879	148114894	Peak_2673	4	+	1.26e-04	26047	CNTNAP2	3'UTR
chr7	148116901	148116927	Peak_2674	4	+	1.26e-04	26047	CNTNAP2	3'UTR
chr2	47387403	47387413	Peak_1735	6	-	1.26e-05	285051	C2orf61	3'UTR
chr12	3048854	3048876	Peak_669	10	+	1.26e-09	7289	TULP3	3'UTR
chr5	36183410	36183466	Peak_2269	9	+	1.26e-09	6502	SKP2	3'UTR
chr12	98942468	98942498	Peak_726	7	+	1.27e-02	7112	TMPO	3'UTR
chr14	90872493	90872519	Peak_954	12	+	1.27e-02	801	CALM1	3'UTR
chr17	57917441	57917447	Peak_1328	5	+	1.27e-03	81671	VMP1	3'UTR
chr2	188329424	188329475	Peak_1795	6	-	1.27e-03	7035	TFPI	3'UTR
chr2	188330729	188330791	Peak_1798	6	-	1.27e-03	7035	TFPI	3'UTR
chr16	67134536	67134537	Peak_1189	8	+	1.27e-05	865	CBFB	3'UTR
chr11	35828975	35828990	Peak_492	7	+	1.27e-07	54765	TRIM44	3'UTR
chr2	224839989	224839991	Peak_1827	23	-	1.27e-09	5270	SERPINE2	3'UTR
chr2	224840409	224840433	Peak_1828	13	-	1.27e-09	5270	SERPINE2	3'UTR
chr10	71871930	71871932	Peak_366	7	+	1.28e-04	55506	H2AFY2	3'UTR
chr19	47113576	47113588	Peak_1540	10	+	1.28e-04	808	CALM3	3'UTR
chr6	43304622	43304623	Peak_2541	5	-	1.28e-05	24149	ZNF318	3'UTR
chr8	38961690	38961711	Peak_2780	8	+	1.28e-08	8754	ADAM9	3'UTR
chr6	36570424	36570447	Peak_2468	8	+	1.29e-02	6428	SRSF3	3'UTR
chr20	1350154	1350193	Peak_1865	6	-	1.29e-03	2280	FKBP1A	3'UTR
chr6	151686400	151686410	Peak_2578	7	-	1.29e-05	57621	ZBTB2	3'UTR
chr1	201452937	201452988	Peak_290	8	-	1.29e-06	1465	CSRP1	3'UTR
chr1	201453811	201453822	Peak_291	8	-	1.29e-06	1465	CSRP1	3'UTR
chr11	61569317	61569330	Peak_609	15	-	1.29e-12	3992	FADS1	3'UTR
chr11	63526098	63526124	Peak_522	9	+	1.29e-12	10313	RTN3	3'UTR
chr9	111778683	111778705	Peak_2970	9	-	1.29e-12	23731	TMEM245	3'UTR
chr10	120444217	120444221	Peak_452	5	-	1.30e-03	143384	CACUL1	3'UTR
chr2	70507090	70507121	Peak_1647	7	+	1.30e-03	51449	PCYOX1	3'UTR
chr14	21679247	21679256	Peak_963	9	-	1.30e-07	3183	HNRNPC	3'UTR
chr11	118915079	118915143	Peak_656	8	-	1.31e-02	10525	HYOU1	3'UTR
chr13	39458898	39458937	Peak_854	4	+	1.31e-02	341640	FREM2	3'UTR
chr5	16666283	16666295	Peak_2391	6	-	1.31e-02	4651	MYO10	3'UTR
chr6	35801077	35801085	Peak_2532	6	-	1.31e-02	6732	SRPK1	3'UTR
chr12	45823815	45823845	Peak_687	5	+	1.31e-03	196527	ANO6	3'UTR
chr8	12880503	12880505	Peak_2757	9	+	1.31e-05	57604	KIAA1456	3'UTR
chr5	53841229	53841261	Peak_2276	10	+	1.31e-08	112574	SNX18	3'UTR
chr14	21927840	21927899	Peak_967	5	-	1.32e-02	84932	RAB2B	3'UTR
chr7	128410892	128410926	Peak_2659	9	+	1.32e-03	813	CALU	3'UTR
chrX	138808757	138808779	Peak_3071	7	-	1.32e-06	286410	ATP11C	3'UTR
chr8	98864771	98864807	Peak_2802	7	+	1.32e-07	55353	LAPTM4B	3'UTR
chr3	183888564	183888609	Peak_2033	7	+	1.33e-02	1857	DVL3	3'UTR
chr3	196556758	196556819	Peak_2044	6	+	1.33e-03	5062	PAK2	3'UTR
chr11	36252509	36252572	Peak_493	5	+	1.33e-04	143458	LDLRAD3	3'UTR
chr13	21949055	21949089	Peak_883	9	-	1.33e-04	253832	ZDHHC20	3'UTR
chr13	21949419	21949421	Peak_885	9	-	1.33e-04	253832	ZDHHC20	3'UTR
chr1	151040509	151040513	Peak_113	8	+	1.34e-02	10962	MLLT11	3'UTR
chr5	10434920	10434962	Peak_2264	5	+	1.34e-02	10299	MARCH6	3'UTR
chr1	203823050	203823062	Peak_152	6	+	1.34e-03	9877	ZC3H11A	3'UTR
chr11	94152612	94152653	Peak_637	6	-	1.34e-05	4361	MRE11A	3'UTR
chrX	53405627	53405648	Peak_3045	10	-	1.34e-08	8243	SMC1A	3'UTR
chrX	77381611	77381616	Peak_3017	10	+	1.34e-08	5230	PGK1	3'UTR
chr8	1954320	1954344	Peak_2752	8	+	1.35e-06	9920	KBTBD11	3'UTR
chr11	63525900	63525926	Peak_521	8	+	1.35e-07	10313	RTN3	3'UTR
chr11	107662235	107662249	Peak_644	16	-	1.35e-09	54733	SLC35F2	3'UTR
chr17	37413401	37413455	Peak_1378	4	-	1.36e-02	84961	FBXL20	3'UTR
chr8	38829880	38829913	Peak_2777	7	+	1.36e-06	59339	PLEKHA2	3'UTR
chr14	67851287	67851337	Peak_939	5	+	1.37e-02	1965	EIF2S1	3'UTR
chr2	65498252	65498259	Peak_1637	7	+	1.37e-02	10097	ACTR2	3'UTR
chr6	7288121	7288165	Peak_2517	8	-	1.38e-02	6745	SSR1	3'UTR
chr8	30643412	30643423	Peak_2828	8	-	1.38e-06	5516	PPP2CB	3'UTR
chr12	54632266	54632279	Peak_797	15	-	1.38e-07	23468	CBX5	3'UTR
chr12	110784803	110784807	Peak_741	30	+	1.38e-09	488	ATP2A2	3'UTR
chr2	96851709	96851719	Peak_1758	8	-	1.39e-04	56910	STARD7	3'UTR
chr7	6064069	6064099	Peak_2687	6	-	1.39e-04	27102	EIF2AK1	3'UTR
chr7	141353013	141353071	Peak_2672	4	+	1.40e-02	55750	AGK	3'UTR
chr17	27085208	27085251	Peak_1371	6	-	1.40e-03	55731	FAM222B	3'UTR
chr17	61823050	61823084	Peak_1392	7	-	1.40e-04	57003	CCDC47	3'UTR
chr17	61823646	61823682	Peak_1393	7	-	1.40e-04	57003	CCDC47	3'UTR
chr2	169626739	169626783	Peak_1680	5	+	1.41e-04	253782	CERS6	3'UTR
chr15	64658071	64658087	Peak_1096	10	-	1.41e-07	9768	KIAA0101	3'UTR
chr19	1088355	1088388	Peak_1559	7	-	1.42e-03	5434	POLR2E	3'UTR
chr11	58385681	58385725	Peak_512	8	+	1.42e-04	386607	ZFP91-CNTF	3'UTR
chr12	66358285	66358308	Peak_711	8	+	0.000142	8091	HMGA2	3'UTR
chr2	29024162	29024186	Peak_1620	7	+	1.42e-05	5500	PPP1CB	3'UTR
chr4	109588816	109588825	Peak_2180	9	+	1.42e-08	58505	OSTC	3'UTR
chr8	26513341	26513393	Peak_2765	11	+	1.42e-08	1808	DPYSL2	3'UTR
chr16	67133471	67133481	Peak_1187	10	+	1.42e-09	865	CBFB	3'UTR
chr12	49084770	49084798	Peak_789	6	-	1.43e-02	904	CCNT1	3'UTR
chr7	134654442	134654468	Peak_2667	5	+	1.43e-02	800	CALD1	3'UTR
chr7	134655199	134655219	Peak_2668	5	+	1.43e-02	800	CALD1	3'UTR
chr20	48698307	48698317	Peak_1891	8	-	1.43e-05	387522	TMEM189-UBE2V1	3'UTR
chr1	32508615	32508647	Peak_31	6	+	1.44e-02	10657	KHDRBS1	3'UTR
chr18	55268706	55268715	Peak_1470	8	-	1.44e-04	4677	NARS	3'UTR
chr9	96327953	96327975	Peak_2912	6	+	1.44e-04	23196	FAM120A	3'UTR
chr10	71911088	71911104	Peak_433	10	-	1.44e-07	56681	SAR1A	3'UTR
chr19	52729534	52729580	Peak_1550	10	+	1.44e-09	5518	PPP2R1A	3'UTR
chr12	118469347	118469408	Peak_752	5	+	1.45e-02	5985	RFC5	3'UTR
chr19	2037579	2037638	Peak_1563	7	-	1.45e-02	2872	MKNK2	3'UTR
chr8	30535965	30536014	Peak_2824	6	-	1.45e-02	2936	GSR	3'UTR
chr8	30536896	30536902	Peak_2826	6	-	1.45e-02	2936	GSR	3'UTR
chr12	116397018	116397087	Peak_836	6	-	1.45e-04	23389	MED13L	3'UTR
chr19	9761142	9761145	Peak_1575	6	-	1.45e-04	54811	ZNF562	3'UTR
chr3	101313015	101313068	Peak_2011	8	+	1.45e-04	57092	PCNP	3'UTR
chr10	72182733	72182749	Peak_367	14	+	1.45e-09	1979	EIF4EBP2	3'UTR
chr7	123181540	123181544	Peak_2738	6	-	1.46e-02	4698	NDUFA5	3'UTR
chr16	29821747	29821784	Peak_1141	13	+	1.46e-08	4150	MAZ	3'UTR
chr16	29822027	29822029	Peak_1143	9	+	1.46e-08	4150	MAZ	3'UTR
chr8	81549705	81549719	Peak_2844	9	-	1.46e-08	619279	ZNF704	3'UTR
chr16	67133800	67133825	Peak_1188	9	+	1.47e-07	865	CBFB	3'UTR
chrX	64959977	64960007	Peak_3009	14	+	1.47e-09	4478	MSN	3'UTR
chrX	64960095	64960127	Peak_3010	15	+	1.47e-09	4478	MSN	3'UTR
chrX	64960568	64960576	Peak_3011	15	+	1.47e-09	4478	MSN	3'UTR
chr14	51721890	51721901	Peak_924	9	+	1.48e-05	81542	TMX1	3'UTR
chr5	140892220	140892238	Peak_2352	7	+	1.48e-05	56106	PCDHGA10	3'UTR
chr3	156259702	156259703	Peak_2111	16	-	1.48e-07	6747	SSR3	3'UTR
chr3	156260043	156260064	Peak_2112	16	-	1.48e-07	6747	SSR3	3'UTR
chr16	29821747	29821784	Peak_1156	13	+	1.48e-08	4150	MAZ	3'UTR
chr16	29822027	29822029	Peak_1158	9	+	1.48e-08	4150	MAZ	3'UTR
chr19	34891136	34891139	Peak_1524	12	+	1.48e-09	2821	GPI	3'UTR
chr7	6501816	6501818	Peak_2691	14	-	1.48e-09	11014	KDELR2	3'UTR
chr2	216225608	216225609	Peak_1813	15	-	1.49e-09	2335	FN1	3'UTR
chr2	216225980	216225984	Peak_1815	21	-	1.49e-09	2335	FN1	3'UTR
chr1	202910185	202910228	Peak_293	7	-	1.51e-03	51094	ADIPOR1	3'UTR
chr10	73576537	73576541	Peak_435	6	-	1.51e-03	5660	PSAP	3'UTR
chr6	132213017	132213049	Peak_2493	6	+	1.51e-03	5167	ENPP1	3'UTR
chr6	132215109	132215166	Peak_2494	6	+	1.51e-03	5167	ENPP1	3'UTR
chr10	33189779	33189792	Peak_419	6	-	1.51e-04	3688	ITGB1	3'UTR
chr6	35802527	35802534	Peak_2533	7	-	1.51e-04	6732	SRPK1	3'UTR
chr7	148700722	148700776	Peak_2749	10	-	1.51e-09	9601	PDIA4	3'UTR
chr17	57771440	57771472	Peak_1327	10	+	1.52e-09	1213	CLTC	3'UTR
chr1	109178197	109178253	Peak_87	5	+	1.53e-02	284611	FAM102B	3'UTR
chr10	71910283	71910303	Peak_432	7	-	1.53e-02	56681	SAR1A	3'UTR
chr12	54633392	54633424	Peak_798	11	-	1.53e-02	23468	CBX5	3'UTR
chr12	54633642	54633672	Peak_799	11	-	1.53e-02	23468	CBX5	3'UTR
chr2	32448347	32448367	Peak_1625	5	+	1.53e-02	55676	SLC30A6	3'UTR
chr5	95223360	95223361	Peak_2414	4	-	1.54e-03	22936	ELL2	3'UTR
chr3	141666948	141666987	Peak_2104	6	-	1.54e-07	7029	TFDP2	3'UTR
chr15	52843033	52843041	Peak_1086	8	-	1.55e-02	10776	ARPP19	3'UTR
chr19	47278294	47278321	Peak_1595	8	-	1.55e-04	6510	SLC1A5	3'UTR
chr1	26604674	26604711	Peak_18	6	+	1.55e-05	64793	CEP85	3'UTR
chr14	54942574	54942579	Peak_979	11	-	1.55e-05	2764	GMFB	3'UTR
chr16	87866456	87866458	Peak_1285	15	-	1.55e-09	8140	SLC7A5	3'UTR
chr5	134670497	134670532	Peak_2435	5	-	1.56e-02	9555	H2AFY	3'UTR
chr2	26618053	26618056	Peak_1611	8	+	1.56e-05	85465	EPT1	3'UTR
chr15	91509578	91509592	Peak_1113	8	-	1.56e-06	9055	PRC1	3'UTR
chr3	152181099	152181113	Peak_2025	8	+	1.56e-08	4154	MBNL1	3'UTR
chr11	111609607	111609641	Peak_652	34	-	1.56e-09	5519	PPP2R1B	3'UTR
chr22	36678288	36678336	Peak_1960	8	-	1.57e-05	4627	MYH9	3'UTR
chr18	33689013	33689061	Peak_1454	6	-	1.58e-02	25800	SLC39A6	3'UTR
chr15	77906049	77906098	Peak_1109	6	-	1.58e-03	84894	LINGO1	3'UTR
chr1	160328388	160328434	Peak_120	7	+	1.58e-06	23385	NCSTN	3'UTR
chr17	74676440	74676462	Peak_1402	7	-	1.58e-06	439921	MXRA7	3'UTR
chr11	35016982	35017007	Peak_491	8	+	1.58e-09	8050	PDHX	3'UTR
chr7	129805508	129805554	Peak_2740	5	-	1.59e-02	84928	TMEM209	3'UTR
chr1	25169954	25169983	Peak_15	6	+	1.60e-02	25932	CLIC4	3'UTR
chr1	25170030	25170047	Peak_16	6	+	1.60e-02	25932	CLIC4	3'UTR
chr10	70743224	70743259	Peak_361	11	+	1.60e-08	9188	DDX21	3'UTR
chr1	192985119	192985159	Peak_287	5	-	1.61e-02	51377	UCHL5	3'UTR
chr5	71503761	71503818	Peak_2291	6	+	1.61e-02	4131	MAP1B	3'UTR
chr5	71504850	71504906	Peak_2292	6	+	1.61e-02	4131	MAP1B	3'UTR
chr12	118582874	118582879	Peak_753	7	+	1.61e-04	5037	PEBP1	3'UTR
chr1	53290756	53290764	Peak_53	7	+	1.61e-07	79699	ZYG11B	3'UTR
chr5	133291669	133291704	Peak_2428	11	-	1.61e-08	56951	C5orf15	3'UTR
chr11	47487647	47487714	Peak_604	7	-	1.62e-03	10658	CELF1	3'UTR
chrX	118377848	118377854	Peak_3024	22	+	1.62e-10	10857	PGRMC1	3'UTR
chr2	183642936	183642943	Peak_1689	6	+	1.63e-03	54431	DNAJC10	3'UTR
chr4	25279220	25279240	Peak_2151	4	+	1.64e-02	55300	PI4K2B	3'UTR
chr5	151184826	151184842	Peak_2367	8	+	1.64e-05	10146	G3BP1	3'UTR
chr4	31145549	31145583	Peak_2157	8	+	1.64e-06	5099	PCDH7	3'UTR
chr3	182636836	182636861	Peak_2032	7	+	1.64e-07	23200	ATP11B	3'UTR
chr19	39220773	39220778	Peak_1529	55	+	1.64e-09	81	ACTN4	3'UTR
chr11	102660781	102660783	Peak_642	35	-	1.64e-10	4312	MMP1	3'UTR
chr3	128888632	128888654	Peak_2097	6	-	1.65e-03	7555	CNBP	3'UTR
chr9	106901643	106901671	Peak_2915	6	+	1.65e-03	10592	SMC2	3'UTR
chr18	45362914	45362974	Peak_1461	7	-	1.65e-05	4087	SMAD2	3'UTR
chr9	21862511	21862523	Peak_2897	5	+	1.66e-03	4507	MTAP	3'UTR
chr16	2508259	2508314	Peak_1120	7	+	1.66e-06	899	CCNF	3'UTR
chr11	105967767	105967830	Peak_554	9	+	1.66e-09	60496	AASDHPPT	3'UTR
chr1	27107369	27107409	Peak_20	6	+	1.67e-02	8289	ARID1A	3'UTR
chr2	29022766	29022773	Peak_1619	6	+	1.67e-03	5500	PPP1CB	3'UTR
chr7	23350498	23350534	Peak_2699	6	-	1.67e-03	10643	IGF2BP3	3'UTR
chr8	37718657	37718715	Peak_2829	7	-	1.67e-06	80223	RAB11FIP1	3'UTR
chr2	191798771	191798805	Peak_1693	9	+	1.67e-09	2744	GLS	3'UTR
chr5	154267174	154267209	Peak_2448	4	-	1.68e-02	25929	GEMIN5	3'UTR
chr12	85276518	85276535	Peak_818	6	-	1.68e-05	55117	SLC6A15	3'UTR
chr6	117883040	117883074	Peak_2564	6	-	1.68e-08	57120	GOPC	3'UTR
chr1	113456042	113456058	Peak_243	6	-	1.69e-02	6566	SLC16A1	3'UTR
chr8	12881566	12881619	Peak_2758	14	+	1.69e-09	57604	KIAA1456	3'UTR
chr3	52580404	52580438	Peak_2066	6	-	1.70e-04	55193	PBRM1	3'UTR
chr3	52580821	52580825	Peak_2067	6	-	1.70e-04	55193	PBRM1	3'UTR
chr11	102267795	102267817	Peak_639	9	-	1.70e-07	114908	TMEM123	3'UTR
chr15	75663237	75663316	Peak_1107	12	-	1.70e-09	25942	SIN3A	3'UTR
chr1	95363142	95363161	Peak_233	6	-	1.71e-02	1266	CNN3	3'UTR
chr19	3053338	3053373	Peak_1565	7	-	1.71e-02	166	AES	3'UTR
chr13	21947772	21947793	Peak_881	12	-	1.71e-09	253832	ZDHHC20	3'UTR
chr13	21948387	21948456	Peak_882	16	-	1.71e-09	253832	ZDHHC20	3'UTR
chr13	21949230	21949235	Peak_884	79	-	1.71e-09	253832	ZDHHC20	3'UTR
chr13	21950327	21950332	Peak_886	14	-	1.71e-09	253832	ZDHHC20	3'UTR
chr1	55316821	55316838	Peak_210	6	-	1.72e-02	1718	DHCR24	3'UTR
chr11	46698884	46698890	Peak_602	6	-	1.72e-03	392	ARHGAP1	3'UTR
chr3	194123730	194123760	Peak_2128	8	-	1.72e-04	79572	ATP13A3	3'UTR
chr3	194124238	194124292	Peak_2129	8	-	1.72e-04	79572	ATP13A3	3'UTR
chr3	194124694	194124716	Peak_2130	8	-	1.72e-04	79572	ATP13A3	3'UTR
chr3	194126320	194126358	Peak_2132	8	-	1.72e-04	79572	ATP13A3	3'UTR
chr4	16164260	16164306	Peak_2211	5	-	1.72e-04	202018	TAPT1	3'UTR
chr2	20450796	20450830	Peak_1725	7	-	1.72e-05	23369	PUM2	3'UTR
chr2	178085911	178085928	Peak_1684	12	+	1.72e-06	220988	HNRNPA3	3'UTR
chr20	43247339	43247364	Peak_1856	6	+	1.72e-07	11142	PKIG	3'UTR
chr17	79477139	79477142	Peak_1404	40	-	1.72e-10	71	ACTG1	3'UTR
chr2	168811529	168811563	Peak_1785	4	-	1.73e-02	27347	STK39	3'UTR
chr5	108671097	108671136	Peak_2415	6	-	1.74e-03	9867	PJA2	3'UTR
chr6	38644467	38644471	Peak_2537	8	-	1.74e-04	2739	GLO1	3'UTR
chr16	66648929	66648991	Peak_1265	7	-	1.74e-07	146223	CMTM4	3'UTR
chr2	106510439	106510487	Peak_1658	6	+	1.74e-07	8440	NCK2	3'UTR
chr8	26515474	26515477	Peak_2769	8	+	1.75e-03	1808	DPYSL2	3'UTR
chrX	3525053	3525065	Peak_3032	5	-	1.75e-03	5613	PRKX	3'UTR
chr17	47905178	47905198	Peak_1320	6	+	1.75e-05	11143	KAT7	3'UTR
chr13	50275172	50275179	Peak_907	7	-	1.75e-07	3839	KPNA3	3'UTR
chr6	118029808	118029844	Peak_2490	5	+	1.76e-02	116150	NUS1	3'UTR
chr4	41956340	41956356	Peak_2162	9	+	1.76e-03	55161	TMEM33	3'UTR
chr4	41957224	41957282	Peak_2163	9	+	1.76e-03	55161	TMEM33	3'UTR
chr16	87442238	87442268	Peak_1280	6	-	1.77e-04	23174	ZCCHC14	3'UTR
chr11	34122173	34122194	Peak_488	11	+	1.77e-05	4076	CAPRIN1	3'UTR
chr19	48885985	48885989	Peak_1596	18	-	1.77e-10	10945	KDELR1	3'UTR
chr12	76440536	76440552	Peak_813	8	-	1.78e-03	4673	NAP1L1	3'UTR
chr12	76441130	76441141	Peak_814	8	-	1.78e-03	4673	NAP1L1	3'UTR
chr16	82182021	82182038	Peak_1278	6	-	1.78e-03	10200	MPHOSPH6	3'UTR
chr19	48244916	48244924	Peak_1544	7	+	1.78e-05	30846	EHD2	3'UTR
chr22	38169959	38169966	Peak_1931	29	+	1.78e-09	11078	TRIOBP	3'UTR
chr1	237065729	237065749	Peak_169	5	+	1.79e-03	4548	MTR	3'UTR
chr2	26358753	26358759	Peak_1610	6	+	1.79e-03	10890	RAB10	3'UTR
chr8	131064709	131064710	Peak_2872	7	-	1.79e-03	50807	ASAP1	3'UTR
chr8	131065102	131065116	Peak_2874	7	-	1.79e-03	50807	ASAP1	3'UTR
chr8	131066149	131066150	Peak_2876	7	-	1.79e-03	50807	ASAP1	3'UTR
chrX	64961395	64961404	Peak_3012	8	+	1.79e-03	4478	MSN	3'UTR
chr2	183790079	183790105	Peak_1792	7	-	1.79e-06	10787	NCKAP1	3'UTR
chr21	46269808	46269817	Peak_1919	10	-	1.79e-06	754	PTTG1IP	3'UTR
chr2	224740845	224740894	Peak_1825	6	-	1.80e-02	57590	WDFY1	3'UTR
chr2	224743030	224743068	Peak_1826	6	-	1.80e-02	57590	WDFY1	3'UTR
chr20	1918581	1918596	Peak_1835	7	+	1.80e-06	140885	SIRPA	3'UTR
chr12	112945970	112945988	Peak_744	6	+	1.81e-02	5781	PTPN11	3'UTR
chr12	112947152	112947174	Peak_746	6	+	1.81e-02	5781	PTPN11	3'UTR
chr6	36077490	36077549	Peak_2465	5	+	1.81e-02	1432	MAPK14	3'UTR
chr3	48509457	48509463	Peak_2061	5	-	1.81e-03	51246	SHISA5	3'UTR
chr20	47730746	47730786	Peak_1885	6	-	1.81e-05	6780	STAU1	3'UTR
chr22	36678496	36678512	Peak_1961	9	-	1.81e-07	4627	MYH9	3'UTR
chr11	74972241	74972242	Peak_625	30	-	1.81e-09	408	ARRB1	3'UTR
chr11	118471819	118471824	Peak_563	11	+	1.81e-09	372	ARCN1	3'UTR
chr9	34634814	34634817	Peak_2956	182	-	1.81e-10	10280	SIGMAR1	3'UTR
chr12	101788379	101788388	Peak_825	5	-	1.82e-02	400	ARL1	3'UTR
chr2	11323009	11323046	Peak_1721	5	-	1.82e-03	9475	ROCK2	3'UTR
chr11	32126902	32126944	Peak_476	5	+	1.82e-05	5954	RCN1	3'UTR
chr18	56996967	56996986	Peak_1472	12	-	1.82e-07	3998	LMAN1	3'UTR
chr18	56997389	56997403	Peak_1473	12	-	1.82e-07	3998	LMAN1	3'UTR
chr21	46190144	46190169	Peak_1915	7	-	1.83e-03	7327	UBE2G2	3'UTR
chr1	113000813	113000871	Peak_92	5	+	1.83e-04	55917	CTTNBP2NL	3'UTR
chr3	107527601	107527611	Peak_2013	5	+	1.84e-05	56987	BBX	3'UTR
chr11	44285891	44285930	Peak_597	9	-	1.84e-07	60529	ALX4	3'UTR
chr3	23962021	23962068	Peak_1984	9	+	1.85e-02	6138	RPL15	3'UTR
chr1	87574646	87574677	Peak_72	5	+	1.86e-02	339524	LOC339524	3'UTR
chr19	21307753	21307794	Peak_1518	6	+	1.87e-04	148206	ZNF714	3'UTR
chr5	1318232	1318281	Peak_2388	7	-	1.87e-05	81037	CLPTM1L	3'UTR
chr10	5499590	5499591	Peak_336	5	+	1.88e-02	10276	NET1	3'UTR
chr1	25169689	25169707	Peak_14	7	+	1.88e-04	25932	CLIC4	3'UTR
chr1	25170230	25170248	Peak_17	7	+	1.88e-04	25932	CLIC4	3'UTR
chr1	25169269	25169291	Peak_13	8	+	1.88e-06	25932	CLIC4	3'UTR
chr13	31034322	31034365	Peak_892	8	-	1.88e-08	3146	HMGB1	3'UTR
chr1	61922639	61922671	Peak_61	6	+	1.89e-03	4774	NFIA	3'UTR
chr1	68591304	68591335	Peak_224	5	-	1.90e-02	79971	WLS	3'UTR
chr17	1248431	1248448	Peak_1349	8	-	1.90e-02	7531	YWHAE	3'UTR
chr17	73314412	73314461	Peak_1396	5	-	1.90e-02	2885	GRB2	3'UTR
chr17	73316176	73316220	Peak_1397	5	-	1.90e-02	2885	GRB2	3'UTR
chr13	37420528	37420593	Peak_898	6	-	1.90e-03	4093	SMAD9	3'UTR
chr15	57580228	57580270	Peak_1040	8	+	1.90e-07	6938	TCF12	3'UTR
chr16	72817619	72817634	Peak_1269	5	-	1.91e-02	463	ZFHX3	3'UTR
chr16	72820010	72820057	Peak_1270	5	-	1.91e-02	463	ZFHX3	3'UTR
chr16	72820172	72820226	Peak_1271	5	-	1.91e-02	463	ZFHX3	3'UTR
chr3	142030000	142030011	Peak_2105	6	-	1.91e-05	54464	XRN1	3'UTR
chr8	81543232	81543259	Peak_2840	6	-	1.92e-02	619279	ZNF704	3'UTR
chr8	81548308	81548359	Peak_2843	6	-	1.92e-02	619279	ZNF704	3'UTR
chr8	81550355	81550361	Peak_2845	6	-	1.92e-02	619279	ZNF704	3'UTR
chr7	93623413	93623445	Peak_2721	4	-	1.92e-03	10282	BET1	3'UTR
chr4	129192153	129192191	Peak_2243	9	-	1.92e-06	10424	PGRMC2	3'UTR
chr11	118619842	118619863	Peak_653	10	-	1.92e-07	1656	DDX6	3'UTR
chr11	58385681	58385725	Peak_514	8	+	1.93e-04	80829	ZFP91	3'UTR
chr22	33256229	33256286	Peak_1928	5	+	1.93e-05	7078	TIMP3	3'UTR
chr5	167690929	167690978	Peak_2375	7	+	1.93e-08	57451	ODZ2	3'UTR
chr5	72205406	72205428	Peak_2293	10	+	1.93e-09	3842	TNPO1	3'UTR
chr4	122737946	122737982	Peak_2241	8	-	1.94e-03	890	CCNA2	3'UTR
chr10	102122233	102122256	Peak_390	14	+	1.94e-06	6319	SCD	3'UTR
chr12	54625219	54625240	Peak_794	22	-	1.94e-09	23468	CBX5	3'UTR
chr12	54628771	54628775	Peak_795	17	-	1.94e-09	23468	CBX5	3'UTR
chr12	54629965	54629974	Peak_796	17	-	1.94e-09	23468	CBX5	3'UTR
chr5	82349930	82349945	Peak_2411	10	-	1.94e-09	153339	TMEM167A	3'UTR
chr5	78075562	78075593	Peak_2407	4	-	1.95e-02	411	ARSB	3'UTR
chr14	56151157	56151171	Peak_931	7	+	1.95e-05	3895	KTN1	3'UTR
chr5	140892220	140892238	Peak_2353	7	+	1.95e-05	56106	PCDHGA10	3'UTR
chr2	20232558	20232586	Peak_1724	6	-	1.96e-04	9741	LAPTM4A	3'UTR
chr11	32999197	32999221	Peak_483	14	+	1.97e-09	79832	QSER1	3'UTR
chr2	10924114	10924144	Peak_1720	5	-	1.98e-02	10130	PDIA6	3'UTR
chr2	12882463	12882516	Peak_1609	5	+	1.99e-02	28951	TRIB2	3'UTR
chrX	100668696	100668754	Peak_3020	5	+	1.99e-02	100529097	RPL36A-HNRNPH2	3'UTR
chrX	117032361	117032406	Peak_3058	4	-	1.99e-02	90293	KLHL13	3'UTR
chr8	81542909	81542916	Peak_2839	7	-	1.99e-04	619279	ZNF704	3'UTR
chr8	81547775	81547779	Peak_2841	7	-	1.99e-04	619279	ZNF704	3'UTR
chr8	81548069	81548088	Peak_2842	7	-	1.99e-04	619279	ZNF704	3'UTR
chr17	47130315	47130330	Peak_1317	11	+	1.99e-07	10642	IGF2BP1	3'UTR
chr7	36492415	36492452	Peak_2608	5	+	2.00e-02	54443	ANLN	3'UTR
chr13	110802021	110802043	Peak_917	4	-	2.00e-03	1282	COL4A1	3'UTR
chr1	22419263	22419321	Peak_12	6	+	2.00e-04	998	CDC42	3'UTR
chr4	31145161	31145168	Peak_2156	7	+	2.00e-04	5099	PCDH7	3'UTR
chr4	31147573	31147627	Peak_2159	7	+	2.00e-04	5099	PCDH7	3'UTR
chr8	41401225	41401288	Peak_2783	7	+	2.00e-05	84296	GINS4	3'UTR
chr11	118267331	118267359	Peak_559	8	+	2.00e-06	9354	UBE4A	3'UTR
chr4	39501310	39501316	Peak_2217	5	-	2.01e-03	7358	UGDH	3'UTR
chr11	32998950	32998960	Peak_482	10	+	2.01e-07	79832	QSER1	3'UTR
chr15	83686413	83686418	Peak_1112	8	-	2.01e-09	53339	BTBD1	3'UTR
chr1	78161979	78162042	Peak_228	5	-	2.02e-02	23032	USP33	3'UTR
chr12	122692690	122692706	Peak_842	5	-	2.02e-02	56616	DIABLO	3'UTR
chr11	17397481	17397531	Peak_471	5	+	2.02e-03	374383	NCR3LG1	3'UTR
chr1	27107630	27107679	Peak_21	7	+	2.02e-04	8289	ARID1A	3'UTR
chr1	120455235	120455254	Peak_252	6	-	2.03e-04	4853	NOTCH2	3'UTR
chr11	118268557	118268565	Peak_560	9	+	2.03e-08	9354	UBE4A	3'UTR
chr17	7482195	7482223	Peak_1297	9	+	2.04e-02	100533955	SENP3-EIF4A1	3'UTR
chrX	123043258	123043274	Peak_3026	5	+	2.04e-02	331	XIAP	3'UTR
chr20	44512733	44512790	Peak_1858	7	+	2.04e-04	90204	ZSWIM1	3'UTR
chr8	131065829	131065862	Peak_2875	8	-	2.04e-05	50807	ASAP1	3'UTR
chr18	3278092	3278098	Peak_1411	8	+	2.04e-06	103910	MYL12B	3'UTR
chr7	5566905	5566931	Peak_2684	32	-	2.04e-10	60	ACTB	3'UTR
chr1	19232188	19232210	Peak_184	12	-	2.05e-09	126917	IFFO2	3'UTR
chr12	2912906	2912907	Peak_668	14	+	2.05e-10	2288	FKBP4	3'UTR
chr18	3498801	3498815	Peak_1445	6	-	2.06e-03	9229	DLGAP1	3'UTR
chr16	18818552	18818563	Peak_1230	7	-	2.07e-06	23049	SMG1	3'UTR
chr10	73770899	73770936	Peak_371	5	+	2.09e-02	119504	ANAPC16	3'UTR
chr7	139107827	139107856	Peak_2670	5	+	2.09e-02	100996928		3'UTR
chr16	46694124	46694180	Peak_1252	5	-	2.10e-02	55737	VPS35	3'UTR
chr16	46694210	46694262	Peak_1253	5	-	2.10e-02	55737	VPS35	3'UTR
chr5	140892220	140892238	Peak_2355	7	+	2.10e-05	8641	PCDHGB4	3'UTR
chr20	48698307	48698317	Peak_1888	8	-	2.10e-06	387522	TMEM189-UBE2V1	3'UTR
chr3	113438168	113438169	Peak_2081	9	-	2.10e-06	80218	NAA50	3'UTR
chr1	67466347	67466403	Peak_219	4	-	2.11e-02	23169	SLC35D1	3'UTR
chr5	148875063	148875113	Peak_2441	6	-	2.11e-03	1452	CSNK1A1	3'UTR
chr6	34255866	34255881	Peak_2528	5	-	2.11e-03	100529239	RPS10-NUDT3	3'UTR
chrX	131208453	131208500	Peak_3029	5	+	2.12e-03	51765	MST4	3'UTR
chr4	114374898	114374941	Peak_2239	4	-	2.13e-02	817	CAMK2D	3'UTR
chr11	4159821	4159843	Peak_462	8	+	2.13e-09	6240	RRM1	3'UTR
chr5	180217956	180217963	Peak_2454	4	-	2.14e-02	4245	MGAT1	3'UTR
chr12	56537850	56537877	Peak_703	6	+	2.14e-03	23344	ESYT1	3'UTR
chr3	49571945	49572019	Peak_2000	6	+	2.14e-04	1605	DAG1	3'UTR
chr9	108153326	108153364	Peak_2919	7	+	2.14e-07	23446	SLC44A1	3'UTR
chr15	77338454	77338458	Peak_1108	9	-	2.14e-09	10099	TSPAN3	3'UTR
chr9	95474918	95474934	Peak_2968	5	-	2.15e-02	23299	BICD2	3'UTR
chr13	98674447	98674454	Peak_869	6	+	2.15e-03	3843	IPO5	3'UTR
chr13	98675290	98675316	Peak_870	6	+	2.15e-03	3843	IPO5	3'UTR
chr11	130013703	130013720	Peak_572	6	+	2.16e-03	334	APLP2	3'UTR
chr18	32913314	32913333	Peak_1452	8	-	2.16e-03	7572	ZNF24	3'UTR
chr14	70835780	70835848	Peak_986	5	-	2.16e-04	55333	SYNJ2BP	3'UTR
chrX	77082021	77082031	Peak_3049	7	-	2.16e-06	84061	MAGT1	3'UTR
chr5	140892220	140892238	Peak_2337	7	+	2.17e-06	56106	PCDHGA10	3'UTR
chr16	74482209	74482250	Peak_1272	7	-	2.18e-02	2734	GLG1	3'UTR
chr16	74482942	74482960	Peak_1273	7	-	2.18e-02	2734	GLG1	3'UTR
chr13	95059192	95059219	Peak_867	5	+	2.18e-03	10082	GPC6	3'UTR
chr7	139107827	139107856	Peak_2671	5	+	2.19e-02	51631	LUC7L2	3'UTR
chr12	113410610	113410644	Peak_747	5	+	2.19e-03	4940	OAS3	3'UTR
chr22	42557034	42557051	Peak_1965	5	-	2.20e-02	6942	TCF20	3'UTR
chrX	133560666	133560696	Peak_3030	7	+	2.20e-06	84295	PHF6	3'UTR
chr3	190025974	190025982	Peak_2127	9	-	2.21e-06	9076	CLDN1	3'UTR
chr20	39752648	39752694	Peak_1854	7	+	2.21e-07	7150	TOP1	3'UTR
chr1	145116710	145116718	Peak_102	4	+	2.22e-02	9554	SEC22B	3'UTR
chr21	27143444	27143478	Peak_1897	5	+	2.22e-02	2551	GABPA	3'UTR
chr4	83847419	83847453	Peak_2227	4	-	2.23e-02	132660	LIN54	3'UTR
chr10	65382242	65382243	Peak_358	6	+	2.23e-03	221035	REEP3	3'UTR
chr17	4173837	4173849	Peak_1359	6	-	2.23e-03	7326	UBE2G1	3'UTR
chr7	106546276	106546307	Peak_2636	5	+	2.23e-05	5294	PIK3CG	3'UTR
chr22	22115392	22115405	Peak_1944	7	-	2.24e-05	5594	MAPK1	3'UTR
chr22	22116330	22116334	Peak_1946	7	-	2.24e-05	5594	MAPK1	3'UTR
chr22	22118244	22118255	Peak_1947	7	-	2.24e-05	5594	MAPK1	3'UTR
chr20	13695128	13695139	Peak_1871	5	-	2.25e-03	51575	ESF1	3'UTR
chr22	38880209	38880249	Peak_1962	8	-	2.26e-02	10521	DDX17	3'UTR
chr1	174983573	174983609	Peak_276	6	-	2.26e-04	63931	MRPS14	3'UTR
chr11	47491854	47491896	Peak_605	8	-	2.26e-05	10658	CELF1	3'UTR
chr1	156712257	156712268	Peak_272	9	-	2.26e-06	3068	HDGF	3'UTR
chr14	23441451	23441512	Peak_968	12	-	2.26e-10	84962	AJUBA	3'UTR
chr2	85770941	85770970	Peak_1649	8	+	2.27e-02	4144	MAT2A	3'UTR
chr8	29920990	29921056	Peak_2822	4	-	2.27e-02	100616190	MIR548O2	3'UTR
chr9	88641248	88641295	Peak_2961	4	-	2.27e-02	51280	GOLM1	3'UTR
chr6	136878637	136878674	Peak_2574	5	-	2.27e-04	4217	MAP3K5	3'UTR
chr1	36068337	36068400	Peak_197	6	-	2.27e-05	5690	PSMB2	3'UTR
chr10	51592234	51592267	Peak_425	4	-	2.28e-02	8505	PARG	3'UTR
chr14	97032660	97032719	Peak_955	6	+	2.28e-02	10914	PAPOLA	3'UTR
chr1	113456272	113456280	Peak_244	7	-	2.28e-04	6566	SLC16A1	3'UTR
chr10	43881624	43881645	Peak_422	10	-	2.28e-05	3185	HNRNPF	3'UTR
chr13	48835885	48835893	Peak_857	10	+	2.28e-09	9445	ITM2B	3'UTR
chr1	171561754	171561791	Peak_140	6	+	2.29e-02	23215	PRRC2C	3'UTR
chr5	150088484	150088528	Peak_2443	5	-	2.29e-02	51164	DCTN4	3'UTR
chr17	56567519	56567545	Peak_1387	6	-	2.29e-03	9110	MTMR4	3'UTR
chr10	51592234	51592267	Peak_424	4	-	2.29e-05	100287932	TIMM23	3'UTR
chr11	16777277	16777304	Peak_470	6	+	2.30e-03	10944	C11orf58	3'UTR
chr19	17434104	17434151	Peak_1585	10	-	2.30e-10	57719	ANO8	3'UTR
chr19	13207001	13207005	Peak_1504	6	+	2.31e-03	4784	NFIX	3'UTR
chr15	99503411	99503427	Peak_1066	6	+	0.000231	3480	IGF1R	3'UTR
chr15	63558275	63558301	Peak_1043	8	+	2.31e-08	51762	RAB8B	3'UTR
chr8	28204194	28204230	Peak_2821	4	-	2.32e-02	55893	ZNF395	3'UTR
chr4	73941247	73941251	Peak_2224	6	-	2.32e-04	26057	ANKRD17	3'UTR
chr2	228222106	228222116	Peak_1706	6	+	2.32e-05	56947	MFF	3'UTR
chr19	3463139	3463189	Peak_1493	8	+	2.33e-02	4782	NFIC	3'UTR
chr8	26228070	26228130	Peak_2764	4	+	2.33e-02	5520	PPP2R2A	3'UTR
chrX	138810817	138810821	Peak_3073	6	-	2.33e-04	286410	ATP11C	3'UTR
chr17	20905058	20905059	Peak_1369	8	-	2.33e-05	23326	USP22	3'UTR
chr8	22878751	22878777	Peak_2819	7	-	2.33e-05	8795	TNFRSF10B	3'UTR
chr13	95059033	95059067	Peak_866	7	+	2.33e-08	10082	GPC6	3'UTR
chr14	102547813	102547825	Peak_1004	11	-	2.33e-09	3320	HSP90AA1	3'UTR
chr6	10397411	10397474	Peak_2520	5	-	2.34e-02	7020	TFAP2A	3'UTR
chr18	12725687	12725718	Peak_1417	5	+	2.34e-04	56984	PSMG2	3'UTR
chr2	9543612	9543673	Peak_1606	6	+	2.34e-04	8853	ASAP2	3'UTR
chr20	17462731	17462764	Peak_1843	8	+	2.34e-07	5126	PCSK2	3'UTR
chr1	45976846	45976873	Peak_200	23	-	2.34e-10	5052	PRDX1	3'UTR
chr12	51636850	51636853	Peak_698	7	+	2.35e-02	9802	DAZAP2	3'UTR
chr19	11276520	11276564	Peak_1579	6	-	2.35e-02	25959	KANK2	3'UTR
chr9	119160080	119160101	Peak_2927	6	+	2.37e-03	5069	PAPPA	3'UTR
chr1	205584207	205584240	Peak_296	6	-	2.37e-04	2005	ELK4	3'UTR
chr1	19665961	19665965	Peak_185	7	-	2.37e-07	832	CAPZB	3'UTR
chr5	133939043	133939069	Peak_2434	6	-	2.38e-02	51128	SAR1B	3'UTR
chr10	13686866	13686873	Peak_410	3	-	2.38e-03	55691	FRMD4A	3'UTR
chr15	48434641	48434673	Peak_1077	6	-	2.38e-04	50804	MYEF2	3'UTR
chr19	583437	583451	Peak_1478	21	+	2.38e-10	682	BSG	3'UTR
chr15	42824262	42824317	Peak_1020	8	+	2.39e-05	8773	SNAP23	3'UTR
chr18	52890487	52890509	Peak_1463	5	-	2.40e-02	6925	TCF4	3'UTR
chr13	100638595	100638607	Peak_873	11	+	2.40e-04	7546	ZIC2	3'UTR
chr8	97346286	97346292	Peak_2798	5	+	2.40e-04	9791	PTDSS1	3'UTR
chr16	69338753	69338803	Peak_1193	11	+	2.40e-09	6645	SNTB2	3'UTR
chr7	134364184	134364208	Peak_2663	5	+	2.41e-04	669	BPGM	3'UTR
chr5	140892220	140892238	Peak_2354	7	+	2.41e-05	56098	PCDHGC4	3'UTR
chr11	102101652	102101677	Peak_552	9	+	2.42e-09	10413	YAP1	3'UTR
chr16	69734534	69734539	Peak_1195	8	+	2.43e-07	10725	NFAT5	3'UTR
chr4	37612430	37612449	Peak_2216	6	-	2.43e-07	768211	RELL1	3'UTR
chr19	19617573	19617590	Peak_1516	11	+	2.43e-09	54815	GATAD2A	3'UTR
chr1	145116710	145116718	Peak_106	4	+	2.44e-02	100132406	NBPF10	3'UTR
chr14	75599941	75599962	Peak_989	8	-	2.44e-04	10972	TMED10	3'UTR
chr9	111777729	111777788	Peak_2969	8	-	2.44e-07	23731	TMEM245	3'UTR
chr7	13933191	13933244	Peak_2695	6	-	2.45e-05	2115	ETV1	3'UTR
chr14	103193258	103193271	Peak_961	9	+	2.45e-08	23186	RCOR1	3'UTR
chr1	180854071	180854133	Peak_143	5	+	2.46e-03	9213	XPR1	3'UTR
chr1	180854538	180854567	Peak_144	5	+	2.46e-03	9213	XPR1	3'UTR
chr9	127910469	127910482	Peak_2985	7	-	2.46e-05	5537	PPP6C	3'UTR
chr7	5567250	5567261	Peak_2685	24	-	2.46e-07	60	ACTB	3'UTR
chr1	214527696	214527719	Peak_310	6	-	2.47e-02	5784	PTPN14	3'UTR
chr1	214530784	214530846	Peak_313	6	-	2.47e-02	5784	PTPN14	3'UTR
chr11	69064650	69064681	Peak_538	6	+	2.47e-02	26579	MYEOV	3'UTR
chr2	224740570	224740599	Peak_1824	8	-	2.47e-06	57590	WDFY1	3'UTR
chr13	21357109	21357162	Peak_880	9	-	2.47e-09	64328	XPO4	3'UTR
chr3	9848206	9848261	Peak_1977	9	+	2.47e-09	100526693	ARPC4-TTLL3	3'UTR
chr9	86584075	86584076	Peak_2960	14	-	2.48e-10	3190	HNRNPK	3'UTR
chr4	140310250	140310253	Peak_2188	5	+	2.49e-02	80155	NAA15	3'UTR
chr3	66430580	66430582	Peak_2072	4	-	2.50e-02	26018	LRIG1	3'UTR
chr11	132288444	132288527	Peak_663	3	-	2.50e-03	4978	OPCML	3'UTR
chr19	55773809	55773844	Peak_1603	9	-	2.50e-09	23640	HSPBP1	3'UTR
chr4	139086359	139086361	Peak_2244	6	-	2.51e-02	23657	SLC7A11	3'UTR
chr2	8869645	8869708	Peak_1718	5	-	2.51e-03	57498	KIDINS220	3'UTR
chr4	174252902	174252922	Peak_2260	9	-	2.51e-03	3148	HMGB2	3'UTR
chr2	161129343	161129392	Peak_1783	6	-	2.51e-05	5937	RBMS1	3'UTR
chr7	34970476	34970526	Peak_2707	6	-	2.51e-05	23333	DPY19L1	3'UTR
chr12	51456778	51456823	Peak_791	5	-	2.52e-02	81566	CSRNP2	3'UTR
chr9	134371675	134371687	Peak_2941	6	+	2.52e-02	84726	PRRC2B	3'UTR
chr9	134372302	134372303	Peak_2942	6	+	2.52e-02	84726	PRRC2B	3'UTR
chr15	101716603	101716659	Peak_1114	5	-	2.52e-03	22856	CHSY1	3'UTR
chr18	13763924	13763951	Peak_1420	5	+	2.52e-04	8731	RNMT	3'UTR
chr12	24964535	24964540	Peak_775	7	-	2.53e-03	586	BCAT1	3'UTR
chr12	24965445	24965468	Peak_776	7	-	2.53e-03	586	BCAT1	3'UTR
chr14	65528808	65528815	Peak_935	4	+	2.55e-02	2342	FNTB	3'UTR
chr1	22418917	22418970	Peak_11	5	+	2.56e-02	998	CDC42	3'UTR
chr15	44706490	44706538	Peak_1024	6	+	2.56e-04	113201	CASC4	3'UTR
chr15	44706990	44707011	Peak_1026	6	+	2.56e-04	113201	CASC4	3'UTR
chr15	44707273	44707315	Peak_1027	6	+	2.56e-04	113201	CASC4	3'UTR
chr6	75962730	75962775	Peak_2546	8	-	2.56e-05	55754	TMEM30A	3'UTR
chr4	77959135	77959144	Peak_2174	6	+	2.58e-02	55752	SEPT11	3'UTR
chr12	62798984	62798991	Peak_706	5	+	2.58e-03	9958	USP15	3'UTR
chr1	147097751	147097777	Peak_112	4	+	2.58e-04	607	BCL9	3'UTR
chr7	105731607	105731616	Peak_2728	7	-	2.58e-04	6856	SYPL1	3'UTR
chr1	36386600	36386608	Peak_36	6	+	2.59e-02	26523	EIF2C1	3'UTR
chr1	36388502	36388511	Peak_38	6	+	2.59e-02	26523	EIF2C1	3'UTR
chr7	98993923	98993957	Peak_2723	8	-	2.59e-06	11333	PDAP1	3'UTR
chr15	49419490	49419506	Peak_1080	7	-	2.60e-05	9318	COPS2	3'UTR
chr6	84234793	84234823	Peak_2483	12	+	2.61e-10	167681	PRSS35	3'UTR
chr22	22115625	22115644	Peak_1945	6	-	2.63e-03	5594	MAPK1	3'UTR
chr8	101931209	101931234	Peak_2858	8	-	2.63e-03	7534	YWHAZ	3'UTR
chr8	101931409	101931433	Peak_2859	8	-	2.63e-03	7534	YWHAZ	3'UTR
chr8	101931736	101931742	Peak_2860	8	-	2.63e-03	7534	YWHAZ	3'UTR
chr1	214527913	214527920	Peak_311	8	-	2.63e-06	5784	PTPN14	3'UTR
chr4	128754242	128754267	Peak_2185	4	+	2.64e-02	22824	HSPA4L	3'UTR
chr2	174773619	174773668	Peak_1787	6	-	2.64e-03	6670	SP3	3'UTR
chr6	64292551	64292584	Peak_2479	5	+	2.65e-02	7803	PTP4A1	3'UTR
chr14	89627099	89627112	Peak_993	4	-	2.66e-02	1112	FOXN3	3'UTR
chr5	121363430	121363493	Peak_2319	4	+	2.66e-02	153443	SRFBP1	3'UTR
chr7	6501563	6501589	Peak_2692	7	-	2.67e-02	221955	DAGLB	3'UTR
chr2	159537406	159537466	Peak_1678	5	+	2.68e-03	8502	PKP4	3'UTR
chr9	132900693	132900740	Peak_2937	6	+	2.68e-03	57720	GPR107	3'UTR
chr9	132901323	132901324	Peak_2938	6	+	2.68e-03	57720	GPR107	3'UTR
chr4	110971459	110971490	Peak_2237	5	-	2.69e-02	79071	ELOVL6	3'UTR
chr3	49397432	49397436	Peak_2064	8	-	2.70e-07	387	RHOA	3'UTR
chr12	19671868	19671910	Peak_682	5	+	2.71e-02	121536	AEBP2	3'UTR
chr11	46765253	46765276	Peak_603	6	-	2.71e-03	9793	CKAP5	3'UTR
chr12	120936073	120936076	Peak_756	6	+	2.71e-04	8655	DYNLL1	3'UTR
chr1	154556776	154556782	Peak_265	9	-	2.71e-09	103	ADAR	3'UTR
chr2	191799230	191799243	Peak_1694	6	+	2.72e-03	2744	GLS	3'UTR
chr9	131262863	131262895	Peak_2932	5	+	2.72e-03	4957	ODF2	3'UTR
chr2	128949034	128949067	Peak_1668	7	+	2.72e-05	56886	UGGT1	3'UTR
chr2	216226090	216226120	Peak_1816	12	-	2.73e-07	2335	FN1	3'UTR
chr20	48697842	48697894	Peak_1890	10	-	2.74e-09	7335	UBE2V1	3'UTR
chr20	48699237	48699238	Peak_1892	10	-	2.74e-09	7335	UBE2V1	3'UTR
chr11	10534065	10534085	Peak_585	5	-	2.75e-02	50862	RNF141	3'UTR
chr1	214529708	214529780	Peak_312	7	-	2.75e-04	5784	PTPN14	3'UTR
chr16	46990461	46990496	Peak_1255	5	-	2.76e-02	10294	DNAJA2	3'UTR
chr11	9469055	9469079	Peak_466	8	+	2.76e-05	10527	IPO7	3'UTR
chr1	223963145	223963175	Peak_158	5	+	2.77e-03	824	CAPN2	3'UTR
chr12	118470999	118471022	Peak_839	8	-	2.77e-07	55884	WSB2	3'UTR
chr8	22279287	22279332	Peak_2762	7	+	2.77e-08	23516	SLC39A14	3'UTR
chr3	180694589	180694612	Peak_2031	8	+	2.77e-09	8087	FXR1	3'UTR
chr12	54633809	54633844	Peak_800	14	-	2.78e-06	23468	CBX5	3'UTR
chr1	1716832	1716835	Peak_172	6	-	2.79e-02	2782	GNB1	3'UTR
chr7	106800818	106800876	Peak_2637	5	+	2.79e-06	5577	PRKAR2B	3'UTR
chr12	118471387	118471449	Peak_840	6	-	2.80e-03	55884	WSB2	3'UTR
chr3	169711040	169711062	Peak_2030	8	+	2.80e-05	7095	SEC62	3'UTR
chr16	46836273	46836330	Peak_1254	4	-	2.81e-02	388272	C16orf87	3'UTR
chr3	124394146	124394208	Peak_2016	4	+	2.81e-03	8997	KALRN	3'UTR
chr11	102102884	102102925	Peak_553	7	+	2.81e-05	10413	YAP1	3'UTR
chr12	66357848	66357883	Peak_709	10	+	2.81e-08	8091	HMGA2	3'UTR
chr12	6857225	6857254	Peak_771	7	-	0.000282	8079	MLF2	3'UTR
chr12	6857587	6857596	Peak_772	7	-	2.82e-04	8079	MLF2	3'UTR
chr3	194125810	194125815	Peak_2131	9	-	2.82e-06	79572	ATP13A3	3'UTR
chr17	74676132	74676158	Peak_1401	5	-	2.83e-02	439921	MXRA7	3'UTR
chr7	148700529	148700578	Peak_2748	6	-	2.84e-02	9601	PDIA4	3'UTR
chr12	110385885	110385938	Peak_829	5	-	2.84e-03	9815	GIT2	3'UTR
chr11	125526853	125526895	Peak_568	6	+	2.84e-04	1111	CHEK1	3'UTR
chr5	140892220	140892238	Peak_2338	7	+	2.84e-06	56097	PCDHGC5	3'UTR
chr12	122989792	122989817	Peak_844	6	-	2.86e-02	65117	RSRC2	3'UTR
chr15	63363495	63363517	Peak_1041	5	+	2.86e-02	7168	TPM1	3'UTR
chr21	46226039	46226060	Peak_1918	6	-	2.86e-02	6612	SUMO3	3'UTR
chr12	42627986	42628025	Peak_782	5	-	2.86e-03	10138	YAF2	3'UTR
chr6	85445090	85445104	Peak_2549	4	-	2.86e-03	9096	TBX18	3'UTR
chr7	73483236	73483299	Peak_2620	5	+	2.86e-04	2006	ELN	3'UTR
chr2	200134359	200134429	Peak_1801	6	-	2.86e-06	23314	SATB2	3'UTR
chr19	811883	811890	Peak_1480	12	+	2.87e-04	5725	PTBP1	3'UTR
chr3	9848206	9848261	Peak_1976	9	+	2.87e-09	100526693	ARPC4-TTLL3	3'UTR
chr5	77782420	77782464	Peak_2406	4	-	2.88e-02	10184	LHFPL2	3'UTR
chr2	65496463	65496477	Peak_1635	8	+	2.89e-04	10097	ACTR2	3'UTR
chr2	128060481	128060498	Peak_1766	7	-	2.89e-04	10746	MAP3K2	3'UTR
chr2	128064390	128064443	Peak_1768	7	-	2.89e-04	10746	MAP3K2	3'UTR
chr15	64448080	64448098	Peak_1093	12	-	2.89e-10	5479	PPIB	3'UTR
chr19	1598160	1598213	Peak_1560	5	-	2.90e-02	10975	UQCR11	3'UTR
chr13	49782065	49782078	Peak_859	5	+	2.90e-03	22862	FNDC3A	3'UTR
chr13	49782459	49782500	Peak_860	5	+	2.90e-03	22862	FNDC3A	3'UTR
chr12	89916032	89916095	Peak_821	4	-	2.92e-02	8693	GALNT4	3'UTR
chr1	162750214	162750258	Peak_124	9	+	2.92e-09	4921	DDR2	3'UTR
chr3	188607775	188607837	Peak_2039	5	+	2.93e-03	4026	LPP	3'UTR
chr6	24173928	24173936	Peak_2526	6	-	2.93e-06	51473	DCDC2	3'UTR
chr1	51822129	51822145	Peak_205	8	-	2.93e-08	2060	EPS15	3'UTR
chr5	110098157	110098194	Peak_2315	6	+	2.95e-04	91137	SLC25A46	3'UTR
chr15	57579934	57579936	Peak_1039	7	+	2.95e-05	6938	TCF12	3'UTR
chr3	176740146	176740182	Peak_2117	6	-	2.96e-02	79718	TBL1XR1	3'UTR
chr16	29821747	29821784	Peak_1161	13	+	2.96e-08	4150	MAZ	3'UTR
chr16	29822027	29822029	Peak_1163	9	+	2.96e-08	4150	MAZ	3'UTR
chr12	39687510	39687547	Peak_781	9	-	2.96e-09	55605	KIF21A	3'UTR
chr2	68406034	68406089	Peak_1749	5	-	2.97e-02	5534	PPP3R1	3'UTR
chr3	179114871	179114900	Peak_2122	7	-	2.97e-02	59345	GNB4	3'UTR
chr16	2303731	2303759	Peak_1217	6	-	2.98e-02	10921	RNPS1	3'UTR
chr21	46190576	46190638	Peak_1916	8	-	2.99e-05	7327	UBE2G2	3'UTR
chr21	46191122	46191162	Peak_1917	8	-	2.99e-05	7327	UBE2G2	3'UTR
chr13	100215227	100215271	Peak_872	4	+	3.00e-03	9375	TM9SF2	3'UTR
chr4	170641600	170641615	Peak_2199	6	+	3.00e-05	1182	CLCN3	3'UTR
chr10	856087	856127	Peak_402	8	-	3.00e-08	23185	LARP4B	3'UTR
chr19	11032732	11032764	Peak_1501	5	+	3.01e-02	10498	CARM1	3'UTR
chr6	18225118	18225151	Peak_2524	6	-	3.01e-02	7913	DEK	3'UTR
chrX	132436303	132436346	Peak_3065	4	-	3.02e-02	2239	GPC4	3'UTR
chr1	212114959	212115011	Peak_307	5	-	3.02e-03	25896	INTS7	3'UTR
chr18	51059244	51059280	Peak_1436	7	+	3.02e-05	1630	DCC	3'UTR
chr7	128409641	128409664	Peak_2656	12	+	3.02e-08	813	CALU	3'UTR
chr7	128410268	128410280	Peak_2658	12	+	3.02e-08	813	CALU	3'UTR
chr22	39451380	39451461	Peak_1932	9	+	3.02e-10	200316	APOBEC3F	3'UTR
chr6	146206593	146206625	Peak_2576	4	-	3.04e-02	257218	SHPRH	3'UTR
chr2	122097149	122097155	Peak_1764	5	-	3.04e-03	23332	CLASP1	3'UTR
chr13	30778732	30778739	Peak_889	6	-	3.05e-03	84056	KATNAL1	3'UTR
chr1	93602678	93602725	Peak_80	7	+	3.05e-05	22823	MTF2	3'UTR
chr2	70506432	70506462	Peak_1646	9	+	3.05e-07	51449	PCYOX1	3'UTR
chr9	91091208	91091212	Peak_2908	6	+	3.06e-02	10927	SPIN1	3'UTR
chr11	62392981	62392993	Peak_614	8	-	3.06e-04	23193	GANAB	3'UTR
chr5	140892220	140892238	Peak_2356	7	+	3.06e-04	26025	PCDHGA12	3'UTR
chr1	186159815	186159846	Peak_148	8	+	3.06e-07	83872	HMCN1	3'UTR
chrX	118751049	118751052	Peak_3060	65	-	3.06e-09	23157	SEPT6	3'UTR
chr3	194999760	194999782	Peak_2135	5	-	3.07e-03	23527	ACAP2	3'UTR
chr6	84235094	84235098	Peak_2484	9	+	3.07e-06	167681	PRSS35	3'UTR
chr10	70931931	70931977	Peak_362	8	+	3.07e-08	9559	VPS26A	3'UTR
chr4	129191735	129191736	Peak_2242	10	-	3.08e-08	10424	PGRMC2	3'UTR
chr9	132652677	132652728	Peak_2989	11	-	3.08e-09	23048	FNBP1	3'UTR
chr7	134653711	134653738	Peak_2665	7	+	3.09e-07	800	CALD1	3'UTR
chr6	82880205	82880215	Peak_2548	5	-	3.10e-02	25998	IBTK	3'UTR
chr2	128948900	128948904	Peak_1667	6	+	3.10e-03	56886	UGGT1	3'UTR
chr3	190367777	190367805	Peak_2041	8	+	3.10e-08	3556	IL1RAP	3'UTR
chr15	73595860	73595869	Peak_1052	5	+	3.12e-03	4756	NEO1	3'UTR
chr12	124499572	124499631	Peak_765	6	+	3.12e-06	144348	ZNF664	3'UTR
chr7	914301	914302	Peak_2584	8	+	3.12e-07	23353	SUN1	3'UTR
chr8	38830964	38830981	Peak_2778	5	+	3.14e-02	59339	PLEKHA2	3'UTR
chr2	223920140	223920184	Peak_1704	8	+	3.14e-04	23704	KCNE4	3'UTR
chr5	140892220	140892238	Peak_2339	7	+	3.17e-06	5098	PCDHGC3	3'UTR
chr8	124826032	124826072	Peak_2803	7	+	3.17e-06	157769	FAM91A1	3'UTR
chr5	180004075	180004123	Peak_2387	5	+	3.18e-02	57472	CNOT6	3'UTR
chr17	4800770	4800797	Peak_1292	5	+	3.18e-03	50488	MINK1	3'UTR
chr1	65158561	65158576	Peak_63	6	+	3.18e-05	57685	CACHD1	3'UTR
chr9	131679365	131679408	Peak_2936	8	+	3.18e-08	56262	LRRC8A	3'UTR
chr6	139693732	139693752	Peak_2575	14	-	3.19e-03	10370	CITED2	3'UTR
chr6	38644170	38644215	Peak_2535	9	-	3.19e-06	2739	GLO1	3'UTR
chr2	178095345	178095379	Peak_1789	7	-	3.20e-08	4780	NFE2L2	3'UTR
chr1	155174308	155174388	Peak_266	9	-	3.20e-09	7059	THBS3	3'UTR
chr14	65528808	65528815	Peak_934	4	+	3.21e-02	2342	FNTB	3'UTR
chr2	27532524	27532566	Peak_1727	4	-	3.21e-02	4358	MPV17	3'UTR
chr1	47842626	47842652	Peak_50	6	+	3.22e-03	51727	CMPK1	3'UTR
chr10	81273179	81273246	Peak_382	10	+	3.22e-08	143244	EIF5AL1	3'UTR
chr3	195777715	195777717	Peak_2137	8	-	3.23e-05	7037	TFRC	3'UTR
chr16	70605911	70605946	Peak_1198	6	+	3.24e-02	23450	SF3B3	3'UTR
chr16	70607348	70607401	Peak_1199	6	+	3.24e-02	23450	SF3B3	3'UTR
chr7	56147966	56147974	Peak_2612	15	+	3.24e-10	25870	SUMF2	3'UTR
chr9	4585706	4585769	Peak_2892	6	+	3.25e-07	6505	SLC1A1	3'UTR
chr17	30326103	30326128	Peak_1309	6	+	3.26e-05	23512	SUZ12	3'UTR
chr1	184762614	184762640	Peak_284	7	-	3.26e-08	116496	FAM129A	3'UTR
chr5	114950830	114950840	Peak_2421	6	-	3.27e-02	100302736	TMED7-TICAM2	3'UTR
chr5	114951215	114951217	Peak_2422	6	-	3.27e-02	100302736	TMED7-TICAM2	3'UTR
chr7	128595048	128595087	Peak_2739	5	-	3.27e-03	23534	TNPO3	3'UTR
chr11	62656194	62656224	Peak_520	7	+	3.27e-06	6520	SLC3A2	3'UTR
chr10	62553891	62553895	Peak_357	10	+	3.27e-10	983	CDK1	3'UTR
chr1	225683120	225683125	Peak_318	15	-	3.28e-09	55740	ENAH	3'UTR
chr4	174244088	174244105	Peak_2202	5	+	3.29e-02	51809	GALNT7	3'UTR
chr4	174244181	174244237	Peak_2203	5	+	3.29e-02	51809	GALNT7	3'UTR
chr16	69733758	69733766	Peak_1194	7	+	3.29e-05	10725	NFAT5	3'UTR
chr7	116146904	116146939	Peak_2646	10	+	3.29e-06	857	CAV1	3'UTR
chr8	17426662	17426707	Peak_2759	6	+	3.30e-04	6542	SLC7A2	3'UTR
chr1	113213238	113213247	Peak_93	8	+	3.30e-05	829	CAPZA1	3'UTR
chr22	23465783	23465805	Peak_1924	4	+	3.31e-02	2781	GNAZ	3'UTR
chr12	122214863	122214922	Peak_758	5	+	3.34e-02	144404	TMEM120B	3'UTR
chr9	134373641	134373664	Peak_2943	9	+	3.34e-08	84726	PRRC2B	3'UTR
chr3	120115010	120115013	Peak_2087	8	-	3.35e-04	11167	FSTL1	3'UTR
chrX	118378206	118378220	Peak_3025	13	+	3.35e-07	10857	PGRMC1	3'UTR
chr15	52203108	52203144	Peak_1034	8	+	3.35e-08	29766	TMOD3	3'UTR
chr9	33113066	33113081	Peak_2954	8	-	3.35e-09	2683	B4GALT1	3'UTR
chr5	176883632	176883688	Peak_2451	13	-	3.37e-10	1627	DBN1	3'UTR
chr9	123942056	123942082	Peak_2980	6	-	3.38e-02	51552	RAB14	3'UTR
chr6	165741141	165741180	Peak_2582	4	-	3.38e-03	10846	PDE10A	3'UTR
chr5	76031299	76031329	Peak_2301	7	+	3.40e-02	2149	F2R	3'UTR
chr9	114984601	114984627	Peak_2975	6	-	3.40e-03	100422990	MIR3134	3'UTR
chr2	27001816	27001886	Peak_1612	9	+	3.40e-08	54978	C2orf18	3'UTR
chr2	70316143	70316182	Peak_1645	12	+	3.41e-02	5093	PCBP1	3'UTR
chr1	162498659	162498701	Peak_122	9	+	3.41e-03	127933	UHMK1	3'UTR
chr8	75763385	75763408	Peak_2794	7	+	3.41e-03	51050	PI15	3'UTR
chr15	86288988	86289020	Peak_1057	5	+	3.41e-04	11214	AKAP13	3'UTR
chr21	43308922	43308996	Peak_1913	4	-	3.42e-02	25966	C2CD2	3'UTR
chrX	138809577	138809596	Peak_3072	5	-	3.42e-02	286410	ATP11C	3'UTR
chr17	47132421	47132444	Peak_1319	9	+	3.42e-04	10642	IGF2BP1	3'UTR
chr22	40723239	40723262	Peak_1936	6	+	3.42e-04	23112	TNRC6B	3'UTR
chr11	57584079	57584093	Peak_510	6	+	3.43e-02	100528016	TMX2-CTNND1	3'UTR
chrX	41209227	41209254	Peak_3008	7	+	3.43e-03	1654	DDX3X	3'UTR
chr2	153512430	153512449	Peak_1780	7	-	3.43e-06	55660	PRPF40A	3'UTR
chr3	145910581	145910660	Peak_2107	4	-	3.44e-03	57088	PLSCR4	3'UTR
chrX	106184595	106184653	Peak_3056	4	-	3.44e-04	79710	MORC4	3'UTR
chr4	153831514	153831565	Peak_2195	4	+	3.45e-03	27236	ARFIP1	3'UTR
chr14	51722125	51722174	Peak_925	12	+	3.45e-10	81542	TMX1	3'UTR
chr17	79801677	79801694	Peak_1407	19	-	3.45e-10	5034	P4HB	3'UTR
chr11	107662093	107662110	Peak_643	6	-	3.46e-03	54733	SLC35F2	3'UTR
chr1	54233270	54233327	Peak_209	7	-	3.48e-06	55706	TMEM48	3'UTR
chr8	41788162	41788220	Peak_2831	5	-	3.49e-03	7994	KAT6A	3'UTR
chr16	24226524	24226535	Peak_1134	8	+	3.50e-06	5579	PRKCB	3'UTR
chr1	225589719	225589751	Peak_316	7	-	3.51e-03	3930	LBR	3'UTR
chr1	225590226	225590266	Peak_317	7	-	3.51e-03	3930	LBR	3'UTR
chr1	225977653	225977673	Peak_160	8	+	3.51e-03	6726	SRP9	3'UTR
chr5	55235089	55235103	Peak_2403	6	-	3.51e-03	3572	IL6ST	3'UTR
chr9	111778972	111778983	Peak_2971	6	-	3.51e-03	23731	TMEM245	3'UTR
chr3	176739439	176739454	Peak_2116	8	-	3.51e-06	79718	TBL1XR1	3'UTR
chr17	4849146	4849165	Peak_1362	15	-	3.51e-08	5216	PFN1	3'UTR
chr12	24970459	24970463	Peak_779	8	-	3.52e-05	586	BCAT1	3'UTR
chr1	201790621	201790660	Peak_151	9	+	3.52e-09	89796	NAV1	3'UTR
chr7	108203934	108203986	Peak_2731	9	-	3.52e-09	168451	THAP5	3'UTR
chr19	42734444	42734477	Peak_1592	5	-	3.53e-02	2931	GSK3A	3'UTR
chr8	98737438	98737448	Peak_2800	8	+	3.53e-07	92140	MTDH	3'UTR
chr6	131161304	131161346	Peak_2571	6	-	3.54e-04	2037	EPB41L2	3'UTR
chr10	102123013	102123026	Peak_391	13	+	3.54e-05	6319	SCD	3'UTR
chr10	102123252	102123270	Peak_392	13	+	3.54e-05	6319	SCD	3'UTR
chr2	69552238	69552274	Peak_1750	7	-	3.54e-05	2673	GFPT1	3'UTR
chr10	74093844	74093885	Peak_436	5	-	3.56e-02	54788	DNAJB12	3'UTR
chr1	226259209	226259246	Peak_161	5	+	3.56e-03	3020	H3F3A	3'UTR
chr5	80716200	80716257	Peak_2410	6	-	3.56e-06	23635	SSBP2	3'UTR
chr10	73770899	73770936	Peak_369	5	+	3.57e-05	119504	ANAPC16	3'UTR
chr1	156278764	156278802	Peak_271	5	-	3.59e-02	7203	CCT3	3'UTR
chr16	24226936	24226961	Peak_1135	6	+	3.59e-02	5579	PRKCB	3'UTR
chr16	24227271	24227279	Peak_1136	6	+	3.59e-02	5579	PRKCB	3'UTR
chr1	226259209	226259246	Peak_162	5	+	3.59e-03	3020	H3F3A	3'UTR
chr17	79668882	79668883	Peak_1343	12	+	3.59e-10	9146	HGS	3'UTR
chr1	52883058	52883069	Peak_52	6	+	3.61e-03	84950	PRPF38A	3'UTR
chr12	76747944	76747986	Peak_816	5	-	3.62e-03	114882	OSBPL8	3'UTR
chr1	184760674	184760676	Peak_283	8	-	3.62e-09	116496	FAM129A	3'UTR
chr2	54896088	54896149	Peak_1632	5	+	3.63e-02	6711	SPTBN1	3'UTR
chr2	54896317	54896339	Peak_1633	5	+	3.63e-02	6711	SPTBN1	3'UTR
chr5	111066262	111066263	Peak_2417	4	-	3.63e-04	9315	NREP	3'UTR
chr2	69552872	69552923	Peak_1751	6	-	3.64e-03	2673	GFPT1	3'UTR
chr7	116146418	116146444	Peak_2641	5	+	3.65e-02	857	CAV1	3'UTR
chr17	75210812	75210833	Peak_1340	5	+	3.66e-02	6397	SEC14L1	3'UTR
chr1	153782546	153782576	Peak_259	6	-	3.66e-04	57459	GATAD2B	3'UTR
chr2	203426291	203426352	Peak_1696	6	+	3.67e-03	659	BMPR2	3'UTR
chr5	126887851	126887883	Peak_2322	6	+	3.67e-04	133619	PRRC1	3'UTR
chr5	158584602	158584632	Peak_2449	7	-	3.67e-06	153830	RNF145	3'UTR
chr19	34890985	34891011	Peak_1523	10	+	3.69e-06	2821	GPI	3'UTR
chr7	128409360	128409395	Peak_2655	8	+	3.70e-02	813	CALU	3'UTR
chr15	89740636	89740671	Peak_1060	7	+	3.70e-06	11057	ABHD2	3'UTR
chr13	103330749	103330791	Peak_874	4	+	3.71e-02	7174	TPP2	3'UTR
chr13	103331464	103331523	Peak_875	4	+	3.71e-02	7174	TPP2	3'UTR
chr10	89728215	89728217	Peak_386	5	+	3.71e-03	5728	PTEN	3'UTR
chr11	4113303	4113313	Peak_460	4	+	3.72e-02	6786	STIM1	3'UTR
chr11	4113556	4113570	Peak_461	4	+	3.72e-02	6786	STIM1	3'UTR
chr1	182353281	182353309	Peak_280	6	-	3.73e-02	2752	GLUL	3'UTR
chr4	73941738	73941746	Peak_2225	5	-	3.74e-02	26057	ANKRD17	3'UTR
chr5	38934475	38934486	Peak_2273	6	+	3.75e-06	9180	OSMR	3'UTR
chr14	68144036	68144041	Peak_983	16	-	3.75e-10	51109	RDH11	3'UTR
chr19	6413302	6413311	Peak_1572	9	-	3.77e-02	8570	KHSRP	3'UTR
chr12	32798053	32798136	Peak_686	4	+	3.77e-03	121512	FGD4	3'UTR
chr2	203429986	203429987	Peak_1697	9	+	3.77e-09	659	BMPR2	3'UTR
chr7	134654005	134654046	Peak_2666	8	+	3.77e-09	800	CALD1	3'UTR
chr13	78337751	78337784	Peak_864	8	+	3.78e-07	122060	SLAIN1	3'UTR
chr9	33922000	33922039	Peak_2955	5	-	3.79e-02	55833	UBAP2	3'UTR
chr8	101715506	101715513	Peak_2855	40	-	3.79e-10	26986	PABPC1	3'UTR
chr11	58894277	58894282	Peak_515	5	+	3.81e-02	374393	FAM111B	3'UTR
chr1	154129634	154129648	Peak_262	6	-	3.82e-02	7170	TPM3	3'UTR
chr15	44706672	44706703	Peak_1025	5	+	3.82e-02	113201	CASC4	3'UTR
chr2	223807701	223807737	Peak_1703	5	+	3.82e-02	2181	ACSL3	3'UTR
chr16	24226269	24226299	Peak_1133	7	+	3.82e-04	5579	PRKCB	3'UTR
chr16	24229340	24229346	Peak_1137	7	+	3.82e-04	5579	PRKCB	3'UTR
chr1	53292231	53292233	Peak_54	6	+	3.82e-05	79699	ZYG11B	3'UTR
chr9	108151415	108151437	Peak_2916	11	+	3.82e-09	23446	SLC44A1	3'UTR
chr9	108151981	108152002	Peak_2917	9	+	3.82e-09	23446	SLC44A1	3'UTR
chr2	29022766	29022773	Peak_1617	6	+	3.83e-02	245711	SPDYA	3'UTR
chr3	141665817	141665877	Peak_2102	4	-	3.84e-02	7029	TFDP2	3'UTR
chr3	141666138	141666171	Peak_2103	4	-	3.84e-02	7029	TFDP2	3'UTR
chr4	26434419	26434424	Peak_2152	7	+	3.85e-06	3516	RBPJ	3'UTR
chr1	8412668	8412688	Peak_175	8	-	3.85e-07	473	RERE	3'UTR
chr4	57368603	57368655	Peak_2170	5	+	3.86e-03	6731	SRP72	3'UTR
chr10	12939314	12939356	Peak_409	3	-	3.87e-02	83643	CCDC3	3'UTR
chr7	26231504	26231527	Peak_2706	10	-	3.87e-02	3181	HNRNPA2B1	3'UTR
chr14	99639689	99639733	Peak_1001	8	-	3.87e-04	64919	BCL11B	3'UTR
chr15	44816865	44816892	Peak_1028	6	+	3.87e-04	51496	CTDSPL2	3'UTR
chr8	38961431	38961464	Peak_2779	6	+	3.88e-04	8754	ADAM9	3'UTR
chr9	14087550	14087608	Peak_2948	6	-	3.88e-07	4781	NFIB	3'UTR
chr21	46271057	46271075	Peak_1920	11	-	3.88e-08	754	PTTG1IP	3'UTR
chr9	117783104	117783162	Peak_2978	9	-	3.89e-09	3371	TNC	3'UTR
chr8	38175216	38175224	Peak_2830	6	-	3.90e-06	54904	WHSC1L1	3'UTR
chr17	49040938	49040968	Peak_1382	5	-	3.91e-02	9043	SPAG9	3'UTR
chr2	37478556	37478571	Peak_1731	5	-	3.91e-02	23683	PRKD3	3'UTR
chr2	187543314	187543356	Peak_1691	5	+	3.92e-02	3685	ITGAV	3'UTR
chr3	33430860	33430866	Peak_2049	7	-	3.92e-06	7342	UBP1	3'UTR
chr14	31917172	31917212	Peak_972	4	-	3.93e-02	25938	HEATR5A	3'UTR
chr19	50372538	50372582	Peak_1600	7	-	3.93e-02	84335	AKT1S1	3'UTR
chr1	65299091	65299108	Peak_216	7	-	3.94e-03	3716	JAK1	3'UTR
chr5	140892220	140892238	Peak_2340	7	+	3.97e-06	56112	PCDHGA3	3'UTR
chr5	150088711	150088746	Peak_2444	8	-	3.97e-09	51164	DCTN4	3'UTR
chr7	25162896	25162898	Peak_2704	12	-	4.00e-06	54205	CYCS	3'UTR
chr17	79801307	79801322	Peak_1406	11	-	4.00e-07	5034	P4HB	3'UTR
chr9	137735426	137735428	Peak_2944	12	+	4.00e-09	1289	COL5A1	3'UTR
chr1	210336973	210337000	Peak_155	8	+	4.01e-08	255928	SYT14	3'UTR
chr22	21976277	21976349	Peak_1923	6	+	4.02e-04	7332	UBE2L3	3'UTR
chr1	202910048	202910056	Peak_292	9	-	4.02e-07	51094	ADIPOR1	3'UTR
chr12	13367744	13367763	Peak_677	6	+	4.04e-02	2012	EMP1	3'UTR
chr22	43015680	43015691	Peak_1966	8	-	4.04e-06	1727	CYB5R3	3'UTR
chrX	153760067	153760113	Peak_3075	8	-	4.04e-06	2539	G6PD	3'UTR
chr5	10679899	10679924	Peak_2390	7	-	4.04e-08	1611	DAP	3'UTR
chr20	62905656	62905719	Peak_1863	9	+	4.04e-10	55251	PCMTD2	3'UTR
chr2	211297138	211297151	Peak_1806	5	-	4.05e-02	10314	LANCL1	3'UTR
chr19	34718495	34718522	Peak_1521	7	+	4.05e-05	26065	LSM14A	3'UTR
chr5	140892220	140892238	Peak_2357	7	+	4.06e-04	56099	PCDHGB7	3'UTR
chr14	95556756	95556777	Peak_997	6	-	4.07e-02	23405	DICER1	3'UTR
chr16	74486663	74486693	Peak_1276	8	-	4.07e-04	2734	GLG1	3'UTR
chr2	171849764	171849811	Peak_1786	5	-	4.08e-03	9874	TLK1	3'UTR
chr4	76570376	76570417	Peak_2226	6	-	4.10e-02	9908	G3BP2	3'UTR
chr14	71578302	71578312	Peak_944	12	+	4.10e-09	22990	PCNX	3'UTR
chr15	62144898	62144935	Peak_1091	7	-	4.10e-09	54832	VPS13C	3'UTR
chr18	33689478	33689501	Peak_1455	10	-	4.10e-10	25800	SLC39A6	3'UTR
chr15	64658071	64658087	Peak_1095	10	-	4.11e-09	9768	KIAA0101	3'UTR
chrX	17751080	17751121	Peak_3004	3	+	4.14e-02	4810	NHS	3'UTR
chr4	146049455	146049462	Peak_2190	7	+	4.14e-05	6059	ABCE1	3'UTR
chr4	157683740	157683788	Peak_2254	13	-	4.14e-09	56034	PDGFC	3'UTR
chr19	21474583	21474657	Peak_1587	6	-	4.16e-06	7562	ZNF708	3'UTR
chr7	16823693	16823723	Peak_2597	6	+	4.17e-03	27075	TSPAN13	3'UTR
chr15	78462503	78462510	Peak_1055	12	+	4.17e-10	3419	IDH3A	3'UTR
chr20	4681140	4681198	Peak_1839	7	+	4.19e-03	5621	PRNP	3'UTR
chr20	4681700	4681724	Peak_1840	7	+	4.19e-03	5621	PRNP	3'UTR
chr3	33908218	33908230	Peak_1990	9	+	4.21e-09	10015	PDCD6IP	3'UTR
chr5	172379125	172379159	Peak_2377	4	+	4.22e-02	57222	ERGIC1	3'UTR
chr20	17463086	17463114	Peak_1844	6	+	4.23e-03	5126	PCSK2	3'UTR
chr8	95441621	95441649	Peak_2849	6	-	4.23e-04	100861412	FSBP	3'UTR
chr2	54895953	54895967	Peak_1631	8	+	4.24e-09	6711	SPTBN1	3'UTR
chr8	6303322	6303411	Peak_2753	4	+	4.25e-02	79648	MCPH1	3'UTR
chr9	4711895	4711908	Peak_2947	7	-	4.25e-04	50808	AK3	3'UTR
chr21	45114388	45114410	Peak_1904	6	+	4.26e-03	23076	RRP1B	3'UTR
chr5	77772105	77772132	Peak_2302	5	+	4.26e-03	9522	SCAMP1	3'UTR
chr11	132206195	132206244	Peak_573	4	+	4.26e-04	50863	NTM	3'UTR
chr3	88102800	88102867	Peak_2075	5	-	4.27e-02	8545	CGGBP1	3'UTR
chr3	88103435	88103474	Peak_2077	5	-	4.27e-02	8545	CGGBP1	3'UTR
chr3	88103660	88103670	Peak_2078	5	-	4.27e-02	8545	CGGBP1	3'UTR
chr13	37271420	37271444	Peak_853	8	+	4.27e-06	400120	SERTM1	3'UTR
chr1	231136080	231136117	Peak_167	12	+	4.28e-10	64801	ARV1	3'UTR
chr15	96881099	96881107	Peak_1063	8	+	4.29e-02	7026	NR2F2	3'UTR
chr15	96881348	96881359	Peak_1064	8	+	4.29e-02	7026	NR2F2	3'UTR
chr12	24966850	24966883	Peak_778	9	-	4.29e-07	586	BCAT1	3'UTR
chr9	21332368	21332406	Peak_2950	11	-	4.29e-08	55958	KLHL9	3'UTR
chrX	77083221	77083280	Peak_3050	5	-	4.30e-02	84061	MAGT1	3'UTR
chr5	72207832	72207875	Peak_2294	6	+	4.31e-02	3842	TNPO1	3'UTR
chr5	72209161	72209194	Peak_2295	6	+	4.31e-02	3842	TNPO1	3'UTR
chr8	124514024	124514089	Peak_2870	4	-	4.31e-02	114907	FBXO32	3'UTR
chr4	164245659	164245668	Peak_2255	12	-	4.31e-07	4886	NPY1R	3'UTR
chr1	29444233	29444252	Peak_28	6	+	4.32e-03	2035	EPB41	3'UTR
chr1	29446371	29446402	Peak_29	6	+	4.32e-03	2035	EPB41	3'UTR
chr10	112772192	112772256	Peak_395	5	+	4.33e-03	8036	SHOC2	3'UTR
chr22	28248971	28248978	Peak_1949	6	-	4.33e-04	23760	PITPNB	3'UTR
chr11	62482501	62482520	Peak_615	8	-	4.34e-06	221092	HNRNPUL2	3'UTR
chr8	21863869	21863910	Peak_2761	5	+	4.35e-03	23039	XPO7	3'UTR
chr1	205684472	205684502	Peak_299	12	-	4.35e-04	64710	NUCKS1	3'UTR
chr4	6623316	6623346	Peak_2147	5	+	4.35e-04	23324	MAN2B2	3'UTR
chr11	12963758	12963762	Peak_468	5	+	4.36e-02	7003	TEAD1	3'UTR
chr22	41756024	41756072	Peak_1938	5	+	4.36e-02	23264	ZC3H7B	3'UTR
chr9	125885853	125885863	Peak_2981	5	-	4.36e-02	55342	STRBP	3'UTR
chr17	73164253	73164260	Peak_1395	6	-	4.36e-03	6613	SUMO2	3'UTR
chr12	120898917	120898965	Peak_755	6	+	4.39e-03	283459	GATC	3'UTR
chr1	40759672	40759675	Peak_41	6	+	4.39e-04	10269	ZMPSTE24	3'UTR
chr11	92629313	92629369	Peak_550	4	+	4.39e-04	120114	FAT3	3'UTR
chr12	50871586	50871593	Peak_694	7	+	4.39e-04	113251	LARP4	3'UTR
chr2	242168844	242168860	Peak_1833	7	-	4.39e-05	3069	HDLBP	3'UTR
chr1	27633937	27633963	Peak_22	6	+	4.39e-06	23038	WDTC1	3'UTR
chr1	12072452	12072460	Peak_8	5	+	4.40e-02	9927	MFN2	3'UTR
chr1	154243046	154243110	Peak_114	7	+	4.40e-05	9898	UBAP2L	3'UTR
chr11	43877341	43877358	Peak_496	7	+	4.41e-06	51144	HSD17B12	3'UTR
chr11	43877692	43877712	Peak_497	7	+	4.41e-06	51144	HSD17B12	3'UTR
chr2	69475323	69475324	Peak_1644	7	+	4.42e-05	84168	ANTXR1	3'UTR
chr9	108399893	108399937	Peak_2920	5	+	4.44e-03	2218	FKTN	3'UTR
chr5	133533003	133533008	Peak_2431	7	-	4.44e-04	5515	PPP2CA	3'UTR
chr20	1350355	1350391	Peak_1868	9	-	4.45e-06	2280	FKBP1A	3'UTR
chr1	67877306	67877327	Peak_220	17	-	4.46e-10	26135	SERBP1	3'UTR
chr15	34522844	34522845	Peak_1071	4	-	4.47e-02	9990	SLC12A6	3'UTR
chr6	151791120	151791155	Peak_2505	5	+	4.47e-02	79624	C6orf211	3'UTR
chr5	154194677	154194698	Peak_2370	7	+	4.47e-03	23367	LARP1	3'UTR
chr5	154197046	154197064	Peak_2371	7	+	4.47e-03	23367	LARP1	3'UTR
chr18	11852779	11852812	Peak_1416	4	+	4.47e-05	2774	GNAL	3'UTR
chr16	23585120	23585185	Peak_1131	7	+	4.48e-03	56061	UBFD1	3'UTR
chr11	60689966	60690003	Peak_516	7	+	4.49e-02	79073	TMEM109	3'UTR
chr3	145788105	145788120	Peak_2106	4	-	4.51e-02	5352	PLOD2	3'UTR
chr1	230416232	230416245	Peak_165	6	+	4.51e-05	2590	GALNT2	3'UTR
chr1	230417791	230417810	Peak_166	6	+	4.51e-05	2590	GALNT2	3'UTR
chr5	158712212	158712241	Peak_2372	31	+	4.52e-10	134510	UBLCP1	3'UTR
chr15	82664399	82664434	Peak_1111	3	-	4.54e-03			3'UTR
chr2	131807500	131807545	Peak_1772	7	-	4.54e-04	130074	FAM168B	3'UTR
chr1	150192703	150192759	Peak_257	8	-	4.56e-03	81611	ANP32E	3'UTR
chr5	137842276	137842280	Peak_2437	6	-	4.56e-03	2107	ETF1	3'UTR
chr6	18225302	18225310	Peak_2525	7	-	4.57e-04	7913	DEK	3'UTR
chrX	16778929	16778946	Peak_3002	8	+	4.58e-08	94056	SYAP1	3'UTR
chr9	112931698	112931741	Peak_2925	7	+	4.59e-07	11217	AKAP2	3'UTR
chr9	91092430	91092452	Peak_2909	8	+	4.61e-06	10927	SPIN1	3'UTR
chr19	6413530	6413546	Peak_1573	16	-	4.61e-10	8570	KHSRP	3'UTR
chr4	41957414	41957416	Peak_2164	8	+	4.62e-02	55161	TMEM33	3'UTR
chr5	76029650	76029671	Peak_2299	10	+	4.62e-07	2149	F2R	3'UTR
chr5	6669173	6669216	Peak_2263	4	+	4.63e-02	6715	SRD5A1	3'UTR
chr1	71474805	71474812	Peak_226	7	-	4.63e-04	5733	PTGER3	3'UTR
chr11	118915724	118915753	Peak_657	9	-	4.64e-04	10525	HYOU1	3'UTR
chr2	27172126	27172152	Peak_1615	8	+	4.64e-08	56896	DPYSL5	3'UTR
chr10	32298211	32298267	Peak_418	7	-	4.65e-03	3799	KIF5B	3'UTR
chr19	2429698	2429716	Peak_1564	12	-	4.65e-08	84823	LMNB2	3'UTR
chr14	23527913	23527940	Peak_969	6	-	4.66e-03	22985	ACIN1	3'UTR
chr12	112466307	112466351	Peak_834	6	-	4.66e-04	80018	NAA25	3'UTR
chr14	21819748	21819761	Peak_965	7	-	4.66e-04	11198	SUPT16H	3'UTR
chr2	69474831	69474879	Peak_1642	9	+	4.66e-09	84168	ANTXR1	3'UTR
chr14	75202288	75202333	Peak_947	15	+	4.66e-10	51077	FCF1	3'UTR
chr11	76261701	76261716	Peak_548	4	+	4.67e-02	56946	C11orf30	3'UTR
chr14	52436425	52436466	Peak_926	4	+	4.67e-02	54331	GNG2	3'UTR
chr8	54959158	54959175	Peak_2834	7	-	4.68e-06	10434	LYPLA1	3'UTR
chr3	195776624	195776648	Peak_2136	9	-	4.68e-07	7037	TFRC	3'UTR
chr1	155979152	155979166	Peak_270	9	-	4.68e-10	6746	SSR2	3'UTR
chr10	116195634	116195640	Peak_449	4	-	4.69e-03	3983	ABLIM1	3'UTR
chr4	16503770	16503833	Peak_2212	6	-	4.70e-06	9079	LDB2	3'UTR
chrX	24095216	24095230	Peak_3005	11	+	4.70e-10	1968	EIF2S3	3'UTR
chr18	47918964	47918995	Peak_1429	6	+	4.71e-03	220134	SKA1	3'UTR
chr7	107559904	107559907	Peak_2638	4	+	4.72e-02	1738	DLD	3'UTR
chr1	68168317	68168363	Peak_222	5	-	4.72e-03	55970	GNG12	3'UTR
chr19	1257562	1257581	Peak_1482	9	+	4.72e-03	90007	MIDN	3'UTR
chr1	94984062	94984119	Peak_82	7	+	4.72e-06	5825	ABCD3	3'UTR
chr13	48650890	48650916	Peak_905	4	-	4.73e-02	29079	MED4	3'UTR
chr5	110834169	110834193	Peak_2416	4	-	4.74e-02	134429	STARD4	3'UTR
chr18	51907583	51907587	Peak_1438	5	+	4.74e-03	162681	C18orf54	3'UTR
chr8	97622179	97622221	Peak_2799	5	+	4.75e-05	6383	SDC2	3'UTR
chr11	118394684	118394717	Peak_562	6	+	4.76e-03	4297	MLL	3'UTR
chr1	38266226	38266286	Peak_39	6	+	4.77e-02	149175	MANEAL	3'UTR
chr2	139327531	139327598	Peak_1674	5	+	4.77e-03	339745	SPOPL	3'UTR
chr5	140892220	140892238	Peak_2341	7	+	4.77e-06	56105	PCDHGA11	3'UTR
chr19	36729310	36729329	Peak_1528	11	+	4.77e-10	7705	ZNF146	3'UTR
chr1	226548928	226548992	Peak_322	5	-	4.80e-02	142	PARP1	3'UTR
chr10	81073888	81073924	Peak_381	5	+	4.82e-03	57178	ZMIZ1	3'UTR
chr18	51059876	51059887	Peak_1437	6	+	4.82e-03	1630	DCC	3'UTR
chr16	84599333	84599372	Peak_1279	6	-	4.82e-06	23406	COTL1	3'UTR
chr8	11701912	11701949	Peak_2811	5	-	4.84e-02	1508	CTSB	3'UTR
chr18	56995172	56995200	Peak_1471	9	-	4.84e-03	3998	LMAN1	3'UTR
chr12	124499572	124499631	Peak_767	6	+	4.86e-02	100533183	ZNF664-FAM101A	3'UTR
chr10	98281082	98281098	Peak_442	7	-	4.88e-05	56889	TM9SF3	3'UTR
chr14	51188856	51188888	Peak_976	6	-	4.88e-06	51199	NIN	3'UTR
chr5	149362820	149362827	Peak_2361	10	+	4.89e-03	1836	SLC26A2	3'UTR
chr5	114949873	114949886	Peak_2420	7	-	4.89e-04	100302736	TMED7-TICAM2	3'UTR
chr1	154179476	154179484	Peak_263	7	-	4.90e-04	25912	C1orf43	3'UTR
chr1	154179596	154179626	Peak_264	7	-	4.90e-04	25912	C1orf43	3'UTR
chr2	121749601	121749640	Peak_1666	5	+	4.91e-02	2736	GLI2	3'UTR
chr3	150260624	150260699	Peak_2108	5	-	4.92e-03	27230	SERP1	3'UTR
chr5	36686478	36686519	Peak_2270	4	+	4.93e-02	6507	SLC1A3	3'UTR
chr20	35869785	35869822	Peak_1851	8	+	4.93e-09	6185	RPN2	3'UTR
chr4	10076233	10076262	Peak_2210	5	-	4.94e-03	9948	WDR1	3'UTR
chr8	18391336	18391363	Peak_2816	4	-	4.95e-02	23362	PSD3	3'UTR
chr20	58522272	58522355	Peak_1861	6	+	4.95e-03	63939	FAM217B	3'UTR
chr13	113977226	113977249	Peak_878	9	+	4.96e-08	3916	LAMP1	3'UTR
chr12	57451620	57451640	Peak_807	6	-	4.98e-03	23306	TMEM194A	3'UTR
chr19	13249590	13249591	Peak_1506	10	+	4.98e-06	112939	NACC1	3'UTR
chr2	212242149	212242180	Peak_1807	7	-	4.98e-06	2066	ERBB4	3'UTR
chrX	100668696	100668754	Peak_3019	5	+	5.00e-04	3188	HNRNPH2	3'UTR
chr11	9468034	9468070	Peak_465	10	+	5.01e-09	10527	IPO7	3'UTR
chr2	32381835	32381871	Peak_1622	5	+	5.04e-03	6683	SPAST	3'UTR
chr14	67800412	67800427	Peak_937	8	+	5.04e-08	64398	MPP5	3'UTR
chr2	74588462	74588468	Peak_1754	5	-	5.05e-03	57835	SLC4A5	3'UTR
chr4	57326072	57326088	Peak_2168	19	+	5.05e-10	10606	PAICS	3'UTR
chr4	57326812	57326821	Peak_2169	19	+	5.05e-10	10606	PAICS	3'UTR
chr7	84626089	84626101	Peak_2716	5	-	5.06e-03	223117	SEMA3D	3'UTR
chr7	84626332	84626382	Peak_2717	5	-	5.06e-03	223117	SEMA3D	3'UTR
chr8	23699958	23700012	Peak_2820	10	-	5.06e-10	6781	STC1	3'UTR
chr19	56185965	56185983	Peak_1552	8	+	5.09e-04	11338	U2AF2	3'UTR
chr12	67707648	67707710	Peak_713	8	+	5.09e-08	55832	CAND1	3'UTR
chr12	30782894	30782929	Peak_780	5	-	5.10e-03	10526	IPO8	3'UTR
chr18	33289754	33289826	Peak_1426	4	+	5.10e-03	2589	GALNT1	3'UTR
chr1	204521876	204521915	Peak_153	5	+	5.11e-04	4194	MDM4	3'UTR
chr19	12841513	12841540	Peak_1581	10	-	5.11e-07	79002	C19orf43	3'UTR
chr6	133137947	133137994	Peak_2495	13	+	5.12e-04	594838	SNORD100	3'UTR
chr4	95588614	95588669	Peak_2178	8	+	5.12e-08	10611	PDLIM5	3'UTR
chr14	23744090	23744126	Peak_970	8	-	5.12e-10	57594	HOMEZ	3'UTR
chr10	115489553	115489601	Peak_396	6	+	5.16e-06	840	CASP7	3'UTR
chr1	10240438	10240469	Peak_3	7	+	5.17e-07	10277	UBE4B	3'UTR
chr10	89505876	89505954	Peak_385	4	+	5.21e-03	9060	PAPSS2	3'UTR
chrX	40510158	40510182	Peak_3043	5	-	5.23e-03	9282	MED14	3'UTR
chr7	94296471	94296484	Peak_2632	11	+	5.24e-03	23089	PEG10	3'UTR
chr15	52842792	52842819	Peak_1085	9	-	5.24e-04	10776	ARPP19	3'UTR
chr13	95058341	95058369	Peak_865	6	+	5.24e-06	10082	GPC6	3'UTR
chr10	105357609	105357641	Peak_445	6	-	5.26e-04	9644	SH3PXD2A	3'UTR
chr10	105359036	105359071	Peak_446	6	-	5.26e-04	9644	SH3PXD2A	3'UTR
chr16	81745182	81745233	Peak_1209	13	+	5.26e-09	80790	CMIP	3'UTR
chr8	12942100	12942130	Peak_2813	5	-	5.27e-04	10395	DLC1	3'UTR
chr2	69473297	69473300	Peak_1638	6	+	5.28e-03	84168	ANTXR1	3'UTR
chr2	69474255	69474273	Peak_1641	6	+	5.28e-03	84168	ANTXR1	3'UTR
chr2	69474979	69474980	Peak_1643	6	+	5.28e-03	84168	ANTXR1	3'UTR
chr9	114984601	114984627	Peak_2973	6	-	5.28e-05	100422990	MIR3134	3'UTR
chr5	140892220	140892238	Peak_2346	7	+	5.28e-06	56100	PCDHGB6	3'UTR
chr5	174954857	174954882	Peak_2378	6	+	5.29e-05	94081	SFXN1	3'UTR
chr12	50869903	50869927	Peak_693	9	+	5.31e-08	113251	LARP4	3'UTR
chr9	108153040	108153067	Peak_2918	6	+	5.32e-05	23446	SLC44A1	3'UTR
chr2	65497409	65497418	Peak_1636	9	+	5.33e-06	10097	ACTR2	3'UTR
chr2	242292812	242292830	Peak_1716	11	+	5.34e-09	4735	SEPT2	3'UTR
chr3	190368414	190368460	Peak_2042	7	+	5.35e-06	3556	IL1RAP	3'UTR
chr1	115260740	115260749	Peak_250	11	-	5.35e-08	7812	CSDE1	3'UTR
chr12	124081430	124081440	Peak_759	16	+	5.35e-10	10959	TMED2	3'UTR
chr12	124082208	124082223	Peak_761	16	+	5.35e-10	10959	TMED2	3'UTR
chr6	166823695	166823701	Peak_2583	4	-	5.39e-03	6196	RPS6KA2	3'UTR
chr11	118621702	118621705	Peak_654	8	-	5.39e-04	1656	DDX6	3'UTR
chr11	110101951	110101967	Peak_649	7	-	5.41e-03	5962	RDX	3'UTR
chr11	110102196	110102230	Peak_650	7	-	5.41e-03	5962	RDX	3'UTR
chr20	31437438	31437458	Peak_1848	9	+	5.41e-09	22919	MAPRE1	3'UTR
chr20	31437875	31437888	Peak_1849	9	+	5.41e-09	22919	MAPRE1	3'UTR
chr12	104742884	104742897	Peak_732	9	+	5.43e-09	7296	TXNRD1	3'UTR
chr12	104743112	104743125	Peak_733	12	+	5.43e-09	7296	TXNRD1	3'UTR
chr12	58114734	58114769	Peak_704	9	+	5.43e-10	10956	OS9	3'UTR
chr16	55540027	55540048	Peak_1183	11	+	5.43e-10	4313	MMP2	3'UTR
chrX	123235709	123235761	Peak_3027	6	+	5.44e-05	10735	STAG2	3'UTR
chr2	74383376	74383384	Peak_1752	6	-	5.45e-05	55233	MOB1A	3'UTR
chr1	205685355	205685362	Peak_301	15	-	5.45e-08	64710	NUCKS1	3'UTR
chr1	205686631	205686637	Peak_304	15	-	5.45e-08	64710	NUCKS1	3'UTR
chr7	5645164	5645166	Peak_2593	15	+	5.47e-10	6624	FSCN1	3'UTR
chr10	116191668	116191751	Peak_448	5	-	5.48e-06	3983	ABLIM1	3'UTR
chr19	34892747	34892812	Peak_1525	8	+	5.50e-03	2821	GPI	3'UTR
chr10	17279414	17279417	Peak_344	15	+	5.50e-10	7431	VIM	3'UTR
chr1	93619435	93619442	Peak_230	9	-	5.51e-07	50999	TMED5	3'UTR
chr21	35475217	35475222	Peak_1901	6	+	5.54e-03	64968	MRPS6	3'UTR
chr15	65255790	65255796	Peak_1097	6	-	5.56e-03	51324	SPG21	3'UTR
chr3	152183311	152183348	Peak_2026	6	+	5.57e-04	4154	MBNL1	3'UTR
chr10	118889128	118889184	Peak_451	8	-	5.58e-04	11023	VAX1	3'UTR
chr5	140892220	140892238	Peak_2347	7	+	5.58e-06	56112	PCDHGA3	3'UTR
chr5	140892220	140892238	Peak_2348	7	+	5.58e-06	56105	PCDHGA11	3'UTR
chr1	230974878	230974933	Peak_325	6	-	5.59e-06	84886	C1orf198	3'UTR
chrX	78616449	78616474	Peak_3053	13	-	5.61e-06	9452	ITM2A	3'UTR
chrX	78616265	78616271	Peak_3052	16	-	5.61e-10	9452	ITM2A	3'UTR
chr10	111894665	111894703	Peak_394	6	+	5.62e-06	120	ADD3	3'UTR
chr5	70954237	70954249	Peak_2290	8	+	5.63e-09	64087	MCCC2	3'UTR
chr1	60339138	60339143	Peak_55	9	+	5.64e-03	51361	HOOK1	3'UTR
chr15	89739318	89739344	Peak_1059	6	+	5.68e-04	11057	ABHD2	3'UTR
chr18	3256076	3256118	Peak_1410	6	+	5.68e-04	10627	MYL12A	3'UTR
chr7	112406882	112406883	Peak_2734	7	-	5.68e-07	64418	TMEM168	3'UTR
chr8	26514063	26514074	Peak_2766	34	+	5.68e-09	1808	DPYSL2	3'UTR
chr8	26514784	26514795	Peak_2767	15	+	5.68e-09	1808	DPYSL2	3'UTR
chr8	26515023	26515031	Peak_2768	22	+	5.68e-09	1808	DPYSL2	3'UTR
chr12	113826794	113826810	Peak_748	6	+	5.71e-03	196463	PLBD2	3'UTR
chr1	110564966	110564980	Peak_89	9	+	5.72e-07	10768	AHCYL1	3'UTR
chr6	43479624	43479627	Peak_2542	7	-	5.73e-03	25844	YIPF3	3'UTR
chr11	88027080	88027113	Peak_633	6	-	5.74e-05	1075	CTSC	3'UTR
chr10	35859137	35859156	Peak_354	5	+	5.75e-03	219771	CCNY	3'UTR
chr5	140892220	140892238	Peak_2342	7	+	5.76e-06	56111	PCDHGA4	3'UTR
chr14	39502091	39502129	Peak_974	7	-	5.76e-08	10484	SEC23A	3'UTR
chr19	48886175	48886211	Peak_1597	9	-	5.77e-03	10945	KDELR1	3'UTR
chr10	5149708	5149733	Peak_335	5	+	5.78e-04	8644	AKR1C3	3'UTR
chr2	202245124	202245181	Peak_1802	5	-	5.80e-03	66008	TRAK2	3'UTR
chr2	29024162	29024186	Peak_1618	7	+	5.81e-04	245711	SPDYA	3'UTR
chr10	27828396	27828430	Peak_353	5	+	5.82e-03	22931	RAB18	3'UTR
chr20	2127807	2127810	Peak_1836	5	+	5.82e-03	140901	STK35	3'UTR
chr8	144989618	144989646	Peak_2886	10	-	5.82e-03	5339	PLEC	3'UTR
chr8	144990134	144990165	Peak_2887	10	-	5.82e-03	5339	PLEC	3'UTR
chr2	122484721	122484751	Peak_1765	6	-	5.82e-04	84365	MKI67IP	3'UTR
chr9	116170119	116170147	Peak_2977	10	-	5.85e-05	54107	POLE3	3'UTR
chr5	79923869	79923912	Peak_2408	6	-	5.86e-03	1719	DHFR	3'UTR
chr14	95555744	95555758	Peak_996	7	-	5.90e-04	23405	DICER1	3'UTR
chr11	66011242	66011300	Peak_530	6	+	5.90e-06	55690	PACS1	3'UTR
chr1	87575122	87575182	Peak_70	6	+	5.92e-04	339524	LOC339524	3'UTR
chr18	47919116	47919165	Peak_1430	7	+	5.92e-05	220134	SKA1	3'UTR
chr2	204292247	204292301	Peak_1698	6	+	5.92e-05	10152	ABI2	3'UTR
chr6	18224787	18224816	Peak_2523	8	-	5.93e-06	7913	DEK	3'UTR
chrX	34645754	34645774	Peak_3040	10	-	5.93e-10	83604	TMEM47	3'UTR
chrX	30848993	30849039	Peak_3038	5	-	5.95e-05	257397	TAB3	3'UTR
chr1	95362933	95362942	Peak_232	14	-	5.96e-10	1266	CNN3	3'UTR
chrX	80553023	80553029	Peak_3018	5	+	5.97e-06	6451	SH3BGRL	3'UTR
chr5	176884105	176884137	Peak_2452	8	-	5.99e-03	1627	DBN1	3'UTR
chr18	12986159	12986164	Peak_1418	7	+	6.00e-05	81929	SEH1L	3'UTR
chr7	914301	914302	Peak_2585	8	+	6.00e-06	51608	GET4	3'UTR
chr7	44748329	44748345	Peak_2609	6	+	6.00e-06	4967	OGDH	3'UTR
chr2	277797	277836	Peak_1604	8	+	6.00e-07	52	ACP1	3'UTR
chr6	36654330	36654357	Peak_2469	7	+	6.01e-04	1026	CDKN1A	3'UTR
chr11	71145913	71145914	Peak_622	6	-	6.02e-04	1717	DHCR7	3'UTR
chr16	3631282	3631317	Peak_1218	5	-	6.02e-04	84464	SLX4	3'UTR
chrX	67753957	67753980	Peak_3013	6	+	6.04e-03	286451	YIPF6	3'UTR
chr22	36139484	36139510	Peak_1955	7	-	6.05e-06	23543	RBFOX2	3'UTR
chr6	7882059	7882060	Peak_2519	9	-	6.05e-08	81567	TXNDC5	3'UTR
chr2	161129131	161129172	Peak_1782	5	-	6.06e-03	5937	RBMS1	3'UTR
chr1	184659974	184660033	Peak_282	6	-	6.06e-05	80267	EDEM3	3'UTR
chr8	37556289	37556290	Peak_2774	18	+	6.07e-11	80139	ZNF703	3'UTR
chr11	67023090	67023119	Peak_535	6	+	6.09e-05	22992	KDM2A	3'UTR
chr21	47609206	47609275	Peak_1921	7	-	6.09e-06	4047	LSS	3'UTR
chr9	110092073	110092095	Peak_2922	8	+	6.10e-05	5887	RAD23B	3'UTR
chr3	120113331	120113338	Peak_2084	9	-	6.10e-06	11167	FSTL1	3'UTR
chr12	57450723	57450738	Peak_806	7	-	6.11e-05	23306	TMEM194A	3'UTR
chr11	62482501	62482520	Peak_616	8	-	6.12e-04	221092	HNRNPUL2	3'UTR
chr3	52083740	52083775	Peak_2065	9	-	6.12e-06	1849	DUSP7	3'UTR
chr6	43129156	43129172	Peak_2473	6	+	6.13e-06	5754	PTK7	3'UTR
chrX	37987719	37987773	Peak_3007	4	+	6.14e-03	94122	SYTL5	3'UTR
chr12	113827411	113827412	Peak_749	12	+	6.14e-10	196463	PLBD2	3'UTR
chr3	113370971	113371006	Peak_2080	7	-	6.15e-06	205717	KIAA2018	3'UTR
chr18	60998043	60998065	Peak_1474	12	-	6.17e-07	2531	KDSR	3'UTR
chr11	6634612	6634647	Peak_579	9	-	6.18e-03	1200	TPP1	3'UTR
chr4	170641678	170641737	Peak_2200	5	+	6.18e-03	1182	CLCN3	3'UTR
chr5	74656596	74656638	Peak_2297	6	+	6.19e-04	3156	HMGCR	3'UTR
chr11	19197804	19197840	Peak_473	4	+	6.22e-03	54503	ZDHHC13	3'UTR
chr11	62392851	62392868	Peak_613	9	-	6.22e-06	23193	GANAB	3'UTR
chr11	118472972	118472987	Peak_564	9	+	6.22e-06	372	ARCN1	3'UTR
chr1	32799942	32799946	Peak_195	18	-	6.26e-09	65108	MARCKSL1	3'UTR
chr11	113146187	113146229	Peak_556	26	+	6.26e-09	4684	NCAM1	3'UTR
chr7	77585125	77585160	Peak_2625	7	+	6.26e-09	57157	PHTF2	3'UTR
chrX	102006351	102006364	Peak_3021	6	+	6.27e-06	80823	BHLHB9	3'UTR
chr12	116397152	116397200	Peak_837	9	-	6.28e-09	23389	MED13L	3'UTR
chr19	13250474	13250509	Peak_1507	8	+	6.30e-03	112939	NACC1	3'UTR
chr1	32372528	32372533	Peak_193	13	-	6.31e-10	8073	PTP4A2	3'UTR
chr5	149933336	149933346	Peak_2364	5	+	6.32e-03	3340	NDST1	3'UTR
chr6	34255866	34255881	Peak_2529	5	-	6.32e-03	100529239	RPS10-NUDT3	3'UTR
chr17	16345078	16345089	Peak_1304	8	+	6.32e-04	125144	C17orf76-AS1	3'UTR
chr4	103717785	103717818	Peak_2230	8	-	6.32e-08	7323	UBE2D3	3'UTR
chr13	31033283	31033298	Peak_890	6	-	6.33e-04	3146	HMGB1	3'UTR
chr8	53535514	53535555	Peak_2833	5	-	6.35e-03	9821	RB1CC1	3'UTR
chr6	7287102	7287107	Peak_2516	23	-	6.36e-10	6745	SSR1	3'UTR
chr7	17383304	17383356	Peak_2598	5	+	6.37e-04	196	AHR	3'UTR
chr1	116947235	116947250	Peak_99	24	+	6.38e-10	476	ATP1A1	3'UTR
chr4	1815428	1815433	Peak_2208	7	-	6.39e-05	3954	LETM1	3'UTR
chr1	162496635	162496668	Peak_121	23	+	6.40e-10	127933	UHMK1	3'UTR
chr11	43365880	43365888	Peak_494	10	+	6.40e-10	8539	API5	3'UTR
chr5	1463118	1463128	Peak_2389	9	-	6.41e-08	79888	LPCAT1	3'UTR
chr16	87865588	87865616	Peak_1282	11	-	6.42e-04	8140	SLC7A5	3'UTR
chr16	87865859	87865867	Peak_1283	11	-	6.42e-04	8140	SLC7A5	3'UTR
chr16	87866229	87866239	Peak_1284	11	-	6.42e-04	8140	SLC7A5	3'UTR
chr2	63273552	63273578	Peak_1634	4	+	6.44e-03	23301	EHBP1	3'UTR
chr5	140892220	140892238	Peak_2349	7	+	6.44e-06	56107	PCDHGA9	3'UTR
chr6	34557910	34557929	Peak_2530	6	-	6.44e-06	64771	C6orf106	3'UTR
chr12	69235025	69235052	Peak_714	8	+	6.47e-04	4193	MDM2	3'UTR
chr12	69235671	69235684	Peak_715	8	+	6.47e-04	4193	MDM2	3'UTR
chr7	116558158	116558159	Peak_2651	5	+	6.47e-06	830	CAPZA2	3'UTR
chr14	21820284	21820316	Peak_966	25	-	6.47e-10	11198	SUPT16H	3'UTR
chr1	11901012	11901025	Peak_7	5	+	6.48e-03	1185	CLCN6	3'UTR
chr19	3462971	3462988	Peak_1492	12	+	6.49e-09	4782	NFIC	3'UTR
chr19	39875283	39875329	Peak_1531	6	+	6.51e-03	55095	SAMD4B	3'UTR
chr7	120989393	120989455	Peak_2736	4	-	6.51e-03	10447	FAM3C	3'UTR
chr1	179814815	179814850	Peak_279	7	-	6.54e-03	163590	TOR1AIP2	3'UTR
chr1	29095627	29095658	Peak_25	14	+	6.54e-10	51441	YTHDF2	3'UTR
chr18	19447482	19447511	Peak_1421	6	+	6.55e-03	57534	MIB1	3'UTR
chr18	19447862	19447920	Peak_1422	6	+	6.55e-03	57534	MIB1	3'UTR
chr1	225683332	225683337	Peak_319	9	-	6.56e-09	55740	ENAH	3'UTR
chr1	159887982	159888005	Peak_273	10	-	6.57e-06	8407	TAGLN2	3'UTR
chr3	125248448	125248493	Peak_2094	6	-	6.57e-07	114885	OSBPL11	3'UTR
chr5	41919108	41919168	Peak_2274	7	+	6.61e-03	285636	C5orf51	3'UTR
chr11	32998331	32998380	Peak_481	8	+	6.61e-04	79832	QSER1	3'UTR
chr19	15533454	15533467	Peak_1584	8	-	6.62e-05	58525	WIZ	3'UTR
chr17	8377997	8378033	Peak_1363	5	-	6.64e-03	4628	MYH10	3'UTR
chr16	74483306	74483327	Peak_1274	9	-	6.64e-06	2734	GLG1	3'UTR
chr7	2419930	2419985	Peak_2586	6	+	6.68e-03	8662	EIF3B	3'UTR
chr11	9303879	9303910	Peak_583	22	-	6.73e-10	440026	TMEM41B	3'UTR
chr12	111158269	111158299	Peak_831	8	-	6.75e-04	5501	PPP1CC	3'UTR
chr12	124497789	124497804	Peak_763	7	+	6.76e-09	100533183	ZNF664-FAM101A	3'UTR
chr3	23932355	23932378	Peak_1983	8	+	6.76e-09	7324	UBE2E1	3'UTR
chr18	55268412	55268461	Peak_1468	7	-	6.79e-03	4677	NARS	3'UTR
chr18	55268521	55268564	Peak_1469	7	-	6.79e-03	4677	NARS	3'UTR
chr3	179114219	179114220	Peak_2120	8	-	6.79e-04	59345	GNB4	3'UTR
chr3	179115123	179115128	Peak_2123	8	-	6.79e-04	59345	GNB4	3'UTR
chr5	140892220	140892238	Peak_2343	7	+	6.79e-06	56101	PCDHGB5	3'UTR
chr3	10168341	10168342	Peak_1979	11	+	6.80e-10	55845	BRK1	3'UTR
chr19	10942374	10942392	Peak_1500	5	+	6.81e-03	1785	DNM2	3'UTR
chr3	33910831	33910885	Peak_1991	7	+	6.82e-05	10015	PDCD6IP	3'UTR
chr8	59361255	59361279	Peak_2790	6	+	6.82e-05	137886	UBXN2B	3'UTR
chr1	94983698	94983719	Peak_81	6	+	6.87e-04	5825	ABCD3	3'UTR
chr12	6979805	6979851	Peak_674	11	+	6.87e-07	7167	TPI1	3'UTR
chr19	39327152	39327183	Peak_1590	11	-	6.89e-10	3191	HNRNPL	3'UTR
chr10	73576348	73576386	Peak_434	9	-	6.90e-10	5660	PSAP	3'UTR
chrX	18910906	18910962	Peak_3036	4	-	6.92e-03	5256	PHKA2	3'UTR
chr16	48395053	48395079	Peak_1256	4	-	6.93e-03	6477	SIAH1	3'UTR
chr3	196559081	196559105	Peak_2045	8	+	6.95e-08	5062	PAK2	3'UTR
chr11	64532728	64532757	Peak_618	12	-	6.99e-09	7536	SF1	3'UTR
chr16	18803882	18803901	Peak_1229	9	-	7.00e-03	23204	ARL6IP1	3'UTR
chr2	87003989	87004011	Peak_1650	4	+	7.00e-03	64795	RMND5A	3'UTR
chr2	87004210	87004241	Peak_1651	4	+	7.00e-03	64795	RMND5A	3'UTR
chr2	87004985	87005013	Peak_1652	4	+	7.00e-03	64795	RMND5A	3'UTR
chr6	86321519	86321544	Peak_2550	21	-	7.02e-10	10492	SYNCRIP	3'UTR
chr11	43878072	43878109	Peak_498	6	+	7.03e-04	51144	HSD17B12	3'UTR
chr14	75601031	75601058	Peak_990	10	-	7.03e-08	10972	TMED10	3'UTR
chr5	154193954	154193990	Peak_2368	8	+	7.04e-05	23367	LARP1	3'UTR
chr5	133493090	133493148	Peak_2430	6	-	7.06e-04	6500	SKP1	3'UTR
chr15	77241692	77241726	Peak_1054	5	+	7.07e-03	5955	RCN2	3'UTR
chr4	151186076	151186106	Peak_2252	5	-	7.07e-05	987	LRBA	3'UTR
chr12	46577555	46577577	Peak_786	6	-	7.08e-05	81539	SLC38A1	3'UTR
chr14	31359470	31359476	Peak_919	6	+	7.13e-03	1690	COCH	3'UTR
chr8	48890379	48890409	Peak_2789	9	+	7.13e-05	4173	MCM4	3'UTR
chr19	36149583	36149599	Peak_1526	7	+	7.17e-07	1340	COX6B1	3'UTR
chr1	8414876	8414906	Peak_177	6	-	7.18e-03	473	RERE	3'UTR
chr3	47627775	47627784	Peak_2054	7	-	7.19e-04	6599	SMARCC1	3'UTR
chr3	47628296	47628304	Peak_2055	7	-	7.19e-04	6599	SMARCC1	3'UTR
chr3	47628484	47628502	Peak_2056	7	-	7.19e-04	6599	SMARCC1	3'UTR
chr3	47628857	47628881	Peak_2057	7	-	7.19e-04	6599	SMARCC1	3'UTR
chr7	91741909	91741983	Peak_2720	6	-	7.21e-05	1595	CYP51A1	3'UTR
chr11	117040302	117040345	Peak_558	6	+	7.22e-03	5049	PAFAH1B2	3'UTR
chr13	95672492	95672503	Peak_911	7	-	7.22e-08	10257	ABCC4	3'UTR
chr18	34376196	34376216	Peak_1456	5	-	7.23e-04	25941	TPGS2	3'UTR
chr11	119534820	119534870	Peak_658	4	-	7.26e-03	5818	PVRL1	3'UTR
chr12	13369326	13369331	Peak_678	7	+	7.26e-04	2012	EMP1	3'UTR
chr12	49521602	49521610	Peak_790	19	-	7.26e-10	10376	TUBA1B	3'UTR
chr1	68167721	68167746	Peak_221	7	-	7.29e-08	55970	GNG12	3'UTR
chr5	102365159	102365177	Peak_2310	7	+	7.35e-06	5066	PAM	3'UTR
chr5	77772252	77772280	Peak_2303	7	+	7.35e-08	9522	SCAMP1	3'UTR
chr1	205683571	205683582	Peak_298	11	-	7.36e-03	64710	NUCKS1	3'UTR
chr1	205684764	205684771	Peak_300	11	-	7.36e-03	64710	NUCKS1	3'UTR
chr1	205685684	205685704	Peak_302	11	-	7.36e-03	64710	NUCKS1	3'UTR
chr3	89530370	89530399	Peak_2010	7	+	7.39e-09	2042	EPHA3	3'UTR
chr14	57268086	57268112	Peak_981	7	-	7.40e-03	5015	OTX2	3'UTR
chr5	179155934	179155971	Peak_2381	10	+	7.42e-03	821	CANX	3'UTR
chr19	10502127	10502130	Peak_1577	7	-	7.42e-04	11140	CDC37	3'UTR
chr19	10754599	10754627	Peak_1499	7	+	7.42e-06	57153	SLC44A2	3'UTR
chr6	163993741	163993764	Peak_2515	7	+	7.44e-08	9444	QKI	3'UTR
chr11	58385352	58385368	Peak_511	7	+	7.45e-03	80829	ZFP91	3'UTR
chr11	121179008	121179036	Peak_567	5	+	7.45e-03	6309	SC5DL	3'UTR
chr17	73842414	73842418	Peak_1398	9	-	7.45e-08	23558	WBP2	3'UTR
chr5	140892220	140892238	Peak_2344	7	+	7.49e-06	56109	PCDHGA6	3'UTR
chr12	95470828	95470875	Peak_824	6	-	7.49e-08	55785	FGD6	3'UTR
chr5	140892220	140892238	Peak_2345	7	+	7.50e-06	56109	PCDHGA6	3'UTR
chr18	723062	723111	Peak_1443	7	-	7.55e-06	7525	YES1	3'UTR
chr6	90038417	90038426	Peak_2554	6	-	7.56e-03	51465	UBE2J1	3'UTR
chr1	21070996	21070998	Peak_186	7	-	7.56e-05	50809	HP1BP3	3'UTR
chr16	61760293	61760360	Peak_1261	11	-	7.59e-09	1006	CDH8	3'UTR
chr1	225684493	225684499	Peak_321	7	-	7.62e-05	55740	ENAH	3'UTR
chr17	76220148	76220215	Peak_1342	10	+	7.63e-09	332	BIRC5	3'UTR
chr19	1611142	1611144	Peak_1561	13	-	7.63e-09	6929	TCF3	3'UTR
chr6	109688795	109688799	Peak_2561	11	-	7.67e-06	8763	CD164	3'UTR
chr1	102268317	102268339	Peak_235	9	-	7.67e-09	118427	OLFM3	3'UTR
chr1	102268721	102268740	Peak_236	9	-	7.67e-09	118427	OLFM3	3'UTR
chr7	129774941	129774946	Peak_2661	8	+	7.71e-09	23008	KLHDC10	3'UTR
chr15	52202235	52202253	Peak_1033	6	+	7.72e-04	29766	TMOD3	3'UTR
chr7	90042780	90042827	Peak_2627	6	+	7.72e-04	9069	CLDN12	3'UTR
chr9	112931698	112931741	Peak_2924	7	+	7.74e-09	445815	PALM2-AKAP2	3'UTR
chr1	32639281	32639288	Peak_33	7	+	7.76e-04	23633	KPNA6	3'UTR
chr12	1019081	1019088	Peak_667	6	+	7.78e-05	65125	WNK1	3'UTR
chr12	53873459	53873460	Peak_702	43	+	7.79e-10	5094	PCBP2	3'UTR
chr13	50274837	50274897	Peak_906	5	-	7.81e-03	3839	KPNA3	3'UTR
chr12	72180717	72180764	Peak_717	5	+	7.81e-04	23011	RAB21	3'UTR
chr1	220321077	220321111	Peak_157	5	+	7.84e-04	55699	IARS2	3'UTR
chr14	90871537	90871553	Peak_953	14	+	7.84e-05	801	CALM1	3'UTR
chr5	58267072	58267084	Peak_2404	3	-	7.88e-03	5144	PDE4D	3'UTR
chrX	135046455	135046462	Peak_3067	7	-	7.88e-03	93380	MMGT1	3'UTR
chr16	11966613	11966626	Peak_1226	6	-	7.90e-03	2935	GSPT1	3'UTR
chr19	59061980	59061981	Peak_1557	12	+	7.91e-08	10155	TRIM28	3'UTR
chr12	124497789	124497804	Peak_766	7	+	7.93e-04	144348	ZNF664	3'UTR
chr10	90974368	90974394	Peak_440	6	-	7.93e-09	3988	LIPA	3'UTR
chr3	156258954	156258963	Peak_2109	17	-	7.98e-09	6747	SSR3	3'UTR
chr1	225683724	225683727	Peak_320	6	-	7.99e-03	55740	ENAH	3'UTR
chr4	71673388	71673453	Peak_2171	5	+	8.00e-05	22902	RUFY3	3'UTR
chr1	90182537	90182595	Peak_76	5	+	8.07e-04	84230	LRRC8C	3'UTR
chr14	62214805	62214825	Peak_933	6	+	8.07e-04	3091	HIF1A	3'UTR
chr3	58279653	58279665	Peak_2007	10	+	8.10e-07	57406	ABHD6	3'UTR
chr2	44999609	44999668	Peak_1629	10	+	8.10e-09	79823	CAMKMT	3'UTR
chr1	115260005	115260006	Peak_247	13	-	8.11e-10	7812	CSDE1	3'UTR
chr1	115260138	115260140	Peak_248	13	-	8.11e-10	7812	CSDE1	3'UTR
chr1	115260434	115260452	Peak_249	17	-	8.11e-10	7812	CSDE1	3'UTR
chr2	216225706	216225745	Peak_1814	9	-	8.13e-03	2335	FN1	3'UTR
chr8	117858237	117858246	Peak_2863	6	-	8.13e-03	5885	RAD21	3'UTR
chr2	242293125	242293140	Peak_1717	8	+	8.17e-04	4735	SEPT2	3'UTR
chr16	54147147	54147177	Peak_1182	6	+	8.18e-07	79068	FTO	3'UTR
chr1	101446901	101446946	Peak_84	6	+	8.25e-04	148867	SLC30A7	3'UTR
chr1	180853435	180853436	Peak_142	6	+	8.26e-06	9213	XPR1	3'UTR
chr1	180855080	180855121	Peak_145	6	+	8.26e-06	9213	XPR1	3'UTR
chr6	38644312	38644333	Peak_2536	7	-	8.27e-03	2739	GLO1	3'UTR
chr5	140892220	140892238	Peak_2350	7	+	8.31e-06	56112	PCDHGA3	3'UTR
chr16	4853714	4853728	Peak_1222	9	-	8.34e-08	84656	GLYR1	3'UTR
chr1	154129401	154129408	Peak_261	8	-	8.43e-06	7170	TPM3	3'UTR
chr19	47504723	47504748	Peak_1541	8	+	8.43e-07	2909	ARHGAP35	3'UTR
chr1	235274392	235274426	Peak_329	7	-	8.44e-04	9804	TOMM20	3'UTR
chr15	58888629	58888651	Peak_1089	7	-	8.48e-08	102	ADAM10	3'UTR
chr20	18469115	18469178	Peak_1874	6	-	8.49e-03	10741	RBBP9	3'UTR
chr11	17108908	17108916	Peak_592	5	-	8.50e-03	5286	PIK3C2A	3'UTR
chr2	48742355	48742415	Peak_1630	4	+	8.52e-03	129285	PPP1R21	3'UTR
chr1	145116900	145116907	Peak_110	9	+	8.56e-07	9554	SEC22B	3'UTR
chr6	41567150	41567205	Peak_2470	5	+	8.58e-03	116113	FOXP4	3'UTR
chr9	37503353	37503414	Peak_2902	5	+	8.58e-03	64425	POLR1E	3'UTR
chr12	124081870	124081877	Peak_760	14	+	8.58e-08	10959	TMED2	3'UTR
chr9	131457437	131457465	Peak_2934	9	+	8.59e-03	6418	SET	3'UTR
chr12	98941723	98941735	Peak_725	10	+	8.64e-08	7112	TMPO	3'UTR
chr8	126034430	126034468	Peak_2804	7	+	8.65e-05	6713	SQLE	3'UTR
chr3	148890144	148890153	Peak_2022	7	+	8.66e-10	84343	HPS3	3'UTR
chr16	4854797	4854803	Peak_1223	10	-	8.68e-10	84656	GLYR1	3'UTR
chr7	16745817	16745861	Peak_2596	7	+	8.69e-07	28969	BZW2	3'UTR
chr12	14651585	14651591	Peak_680	7	+	8.74e-07	55729	ATF7IP	3'UTR
chr3	52581667	52581691	Peak_2068	7	-	8.75e-07	55193	PBRM1	3'UTR
chr7	25163077	25163089	Peak_2705	11	-	8.80e-05	54205	CYCS	3'UTR
chr8	61535526	61535553	Peak_2791	6	+	8.80e-05	5862	RAB2A	3'UTR
chr2	37334144	37334146	Peak_1730	6	-	8.83e-04	5610	EIF2AK2	3'UTR
chr11	120357664	120357668	Peak_565	7	+	8.83e-06	23365	ARHGEF12	3'UTR
chr20	48252271	48252325	Peak_1886	6	-	8.84e-04	9334	B4GALT5	3'UTR
chr8	124332462	124332471	Peak_2869	7	-	8.85e-05	29028	ATAD2	3'UTR
chr2	189897501	189897511	Peak_1799	6	-	8.86e-06	1290	COL5A2	3'UTR
chr9	89559585	89559598	Peak_2964	9	-	8.88e-05	2619	GAS1	3'UTR
chr3	113805100	113805153	Peak_2014	5	+	8.91e-03	79691	QTRTD1	3'UTR
chr7	35944518	35944563	Peak_2606	5	+	8.92e-03	989	SEPT7	3'UTR
chr7	35944672	35944674	Peak_2607	5	+	8.92e-03	989	SEPT7	3'UTR
chr20	43536817	43536836	Peak_1857	8	+	8.93e-05	7529	YWHAB	3'UTR
chr6	111982653	111982687	Peak_2563	4	-	8.94e-03	2534	FYN	3'UTR
chr15	41672472	41672474	Peak_1018	7	+	8.94e-06	51203	NUSAP1	3'UTR
chr12	104742644	104742655	Peak_731	7	+	8.95e-07	7296	TXNRD1	3'UTR
chr8	27529128	27529164	Peak_2770	4	+	8.96e-03	51435	SCARA3	3'UTR
chr17	34051426	34051441	Peak_1312	6	+	8.98e-06	163	AP2B1	3'UTR
chr6	139499644	139499707	Peak_2499	9	+	8.99e-10	51696	HECA	3'UTR
chr2	8823904	8823917	Peak_1605	7	+	9.02e-03	3398	ID2	3'UTR
chr2	113334234	113334274	Peak_1663	8	+	9.02e-09	84172	POLR1B	3'UTR
chr14	54943363	54943392	Peak_980	9	-	9.03e-03	2764	GMFB	3'UTR
chr7	66421130	66421135	Peak_2617	6	+	9.03e-04	55069	TMEM248	3'UTR
chr8	87573314	87573328	Peak_2797	7	+	9.04e-07	8895	CPNE3	3'UTR
chr17	26522009	26522036	Peak_1305	7	+	9.09e-09	51701	NLK	3'UTR
chr10	5807699	5807717	Peak_403	6	-	9.12e-04	2665	GDI2	3'UTR
chr16	29821907	29821949	Peak_1157	6	+	9.12e-06	4150	MAZ	3'UTR
chrX	10111558	10111575	Peak_2999	5	+	9.13e-04	55841	WWC3	3'UTR
chr16	29821907	29821949	Peak_1162	6	+	9.16e-06	4150	MAZ	3'UTR
chr1	66838842	66838905	Peak_64	3	+	9.21e-03	5142	PDE4B	3'UTR
chr5	76030936	76030971	Peak_2300	8	+	9.23e-04	2149	F2R	3'UTR
chr14	53109355	53109369	Peak_978	7	-	9.23e-08	30001	ERO1L	3'UTR
chr17	53039468	53039489	Peak_1384	6	-	9.25e-04	1353	COX11	3'UTR
chr1	11083358	11083375	Peak_6	10	+	9.25e-08	23435	TARDBP	3'UTR
chr2	9725179	9725201	Peak_1719	12	-	9.26e-10	10971	YWHAQ	3'UTR
chr7	44842564	44842587	Peak_2610	7	+	9.27e-04	5478	PPIA	3'UTR
chr6	108364740	108364793	Peak_2560	6	-	9.27e-05	28962	OSTM1	3'UTR
chr19	39220973	39220996	Peak_1530	8	+	9.27e-06	81	ACTN4	3'UTR
chr1	228286749	228286764	Peak_163	8	+	9.34e-04	375	ARF1	3'UTR
chr14	70835780	70835848	Peak_985	5	-	9.34e-05	55333	SYNJ2BP	3'UTR
chr16	450460	450476	Peak_1116	11	+	9.41e-06	4833	NME4	3'UTR
chr19	4047156	4047160	Peak_1569	9	-	9.42e-04	51341	ZBTB7A	3'UTR
chr12	54624784	54624792	Peak_793	12	-	9.44e-04	23468	CBX5	3'UTR
chr16	29821907	29821949	Peak_1167	6	+	9.44e-06	4150	MAZ	3'UTR
chr16	29821907	29821949	Peak_1172	6	+	9.44e-06	4150	MAZ	3'UTR
chr5	138665241	138665245	Peak_2331	8	+	9.46e-05	9782	MATR3	3'UTR
chr4	103717861	103717897	Peak_2231	7	-	9.46e-06	7323	UBE2D3	3'UTR
chr5	114858681	114858684	Peak_2419	10	-	9.46e-10	56929	FEM1C	3'UTR
chr15	48634434	48634484	Peak_1031	7	+	9.49e-04	1854	DUT	3'UTR
chr4	55606505	55606551	Peak_2165	4	+	9.51e-03	3815	KIT	3'UTR
chr8	18387521	18387529	Peak_2815	5	-	9.51e-05	23362	PSD3	3'UTR
chr11	66044540	66044561	Peak_531	7	+	9.52e-03	81876	RAB1B	3'UTR
chr16	29821907	29821949	Peak_1147	6	+	9.54e-06	4150	MAZ	3'UTR
chr16	29821907	29821949	Peak_1152	6	+	9.54e-06	4150	MAZ	3'UTR
chr9	86275247	86275266	Peak_2959	9	-	9.54e-10	29979	UBQLN1	3'UTR
chr5	65120321	65120373	Peak_2281	7	+	9.56e-07	57486	NLN	3'UTR
chr13	23904232	23904261	Peak_887	6	-	9.60e-05	26278	SACS	3'UTR
chr11	58385352	58385368	Peak_513	7	+	9.61e-03	80829	ZFP91	3'UTR
chr5	53840196	53840220	Peak_2275	9	+	9.62e-07	112574	SNX18	3'UTR
chr2	201688017	201688028	Peak_1695	9	+	9.64e-10	9689	BZW1	3'UTR
chr12	105155373	105155393	Peak_734	4	+	9.68e-04	50515	CHST11	3'UTR
chr4	95585663	95585694	Peak_2176	7	+	9.70e-06	10611	PDLIM5	3'UTR
chr2	223806742	223806750	Peak_1702	8	+	9.74e-09	2181	ACSL3	3'UTR
chr6	90038974	90039011	Peak_2555	7	-	9.75e-05	51465	UBE2J1	3'UTR
chr16	29821907	29821949	Peak_1142	6	+	9.75e-06	4150	MAZ	3'UTR
chr14	81941103	81941116	Peak_992	6	-	9.77e-04	6400	SEL1L	3'UTR
chr1	102269414	102269425	Peak_237	6	-	9.78e-03	118427	OLFM3	3'UTR
chr22	43193073	43193111	Peak_1967	4	-	9.79e-03	26286	ARFGAP3	3'UTR
chr19	46029647	46029667	Peak_1539	8	+	9.80e-04	7408	VASP	3'UTR
chr16	66921571	66921634	Peak_1185	7	+	9.81e-03	57546	PDP2	3'UTR
chr16	66921939	66921991	Peak_1186	7	+	9.81e-03	57546	PDP2	3'UTR
chr2	188329818	188329836	Peak_1796	7	-	9.84e-06	7035	TFPI	3'UTR
chr8	30536648	30536678	Peak_2825	12	-	9.85e-10	2936	GSR	3'UTR
chr3	120113898	120113930	Peak_2085	10	-	9.86e-08	11167	FSTL1	3'UTR
chr5	34832178	34832193	Peak_2268	4	+	9.90e-04	26064	RAI14	3'UTR
chr10	99192859	99192904	Peak_389	5	+	9.91e-03	5223	PGAM1	3'UTR
chr22	36137911	36137935	Peak_1954	6	-	9.91e-04	23543	RBFOX2	3'UTR
chr22	36139632	36139661	Peak_1956	6	-	9.91e-04	23543	RBFOX2	3'UTR
chr2	74588462	74588468	Peak_1753	5	-	9.91e-07	57835	SLC4A5	3'UTR
chr1	46506986	46507049	Peak_201	5	-	9.92e-04	8503	PIK3R3	3'UTR
chrX	15845028	15845051	Peak_3035	6	-	9.92e-04	8905	AP1S2	3'UTR
chr1	67451415	67451431	Peak_65	6	+	9.97e-04	57708	MIER1	3'UTR
chr11	122943770	122943789	Peak_659	6	-	9.97e-05	79827	CLMP	3'UTR
chr7	74072055	74072066	Peak_2621	5	+	1.00e-02	2969	GTF2I	5'UTR
chr11	61735036	61735050	Peak_610	29	-	1.00e-100	2495	FTH1	5'UTR
chr11	128563860	128563873	Peak_570	12	+	1.00e-100	2313	FLI1	5'UTR
chr12	66218522	66218531	Peak_708	34	+	1.00e-100	8091	HMGA2	5'UTR
chr3	45636312	45636356	Peak_1998	15	+	1.00e-100	8994	LIMD1	5'UTR
chr5	109025652	109025691	Peak_2312	11	+	1.00e-100	4124	MAN2A1	5'UTR
chr5	109025881	109025910	Peak_2313	10	+	1.00e-100	4124	MAN2A1	5'UTR
chr6	15249118	15249149	Peak_2459	8	+	1.00e-100	3720	JARID2	5'UTR
chr6	158734415	158734419	Peak_2509	9	+	1.00e-100	56995	TULP4	5'UTR
chr7	121513392	121513418	Peak_2654	15	+	1.00e-100	5803	PTPRZ1	5'UTR
chr7	69064460	69064473	Peak_2618	4	+	1.09e-03	26053	AUTS2	5'UTR
chr14	20786606	20786643	Peak_962	8	-	1.17e-07	57820	CCNB1IP1	5'UTR
chr9	131464962	131464990	Peak_2935	7	+	1.26e-05	29941	PKN3	5'UTR
chr9	90113902	90113934	Peak_2906	7	+	1.28e-03	1612	DAPK1	5'UTR
chr6	36562171	36562211	Peak_2467	8	+	1.29e-02	6428	SRSF3	5'UTR
chr5	16936292	16936306	Peak_2395	6	-	1.31e-02	4651	MYO10	5'UTR
chr16	29606417	29606438	Peak_1238	6	-	1.36e-07	552900	BOLA2	5'UTR
chr11	70217480	70217514	Peak_542	7	+	1.39e-05	8500	PPFIA1	5'UTR
chr2	216300663	216300677	Peak_1819	15	-	1.49e-09	2335	FN1	5'UTR
chr17	57697410	57697426	Peak_1326	11	+	1.52e-09	1213	CLTC	5'UTR
chr16	29606596	29606639	Peak_1242	5	-	1.55e-04	440354	LOC440354	5'UTR
chr11	45826927	45826978	Peak_501	8	+	1.57e-05	55343	SLC35C1	5'UTR
chr16	29606596	29606639	Peak_1248	5	-	1.63e-04	552900	BOLA2	5'UTR
chr16	29606596	29606639	Peak_1251	5	-	1.63e-04	552900	BOLA2	5'UTR
chr8	6566128	6566183	Peak_2755	6	+	1.64e-03	55326	AGPAT5	5'UTR
chr16	29606596	29606639	Peak_1245	5	-	1.64e-04	440354	LOC440354	5'UTR
chr19	56186681	56186689	Peak_1553	6	+	1.69e-02	29924	EPN1	5'UTR
chr16	29606417	29606438	Peak_1241	6	-	2.07e-07	552900	BOLA2	5'UTR
chr2	100106336	100106406	Peak_1760	4	-	2.14e-02	51455	REV1	5'UTR
chr19	49371491	49371549	Peak_1599	4	-	2.22e-02	57664	PLEKHA4	5'UTR
chr16	29606417	29606438	Peak_1244	6	-	2.34e-07	552900	BOLA2	5'UTR
chr16	29606417	29606438	Peak_1247	6	-	2.49e-07	552900	BOLA2	5'UTR
chr16	29606417	29606438	Peak_1250	6	-	2.49e-07	440354	LOC440354	5'UTR
chr1	32384675	32384718	Peak_194	10	-	2.83e-08	8073	PTP4A2	5'UTR
chr9	125946413	125946475	Peak_2982	6	-	2.92e-04	55342	STRBP	5'UTR
chr6	158991274	158991343	Peak_2512	8	+	2.97e-07	57583	TMEM181	5'UTR
chr21	38445764	38445794	Peak_1903	5	+	3.24e-02	7267	TTC3	5'UTR
chr7	105752695	105752699	Peak_2729	8	-	3.37e-06	6856	SYPL1	5'UTR
chr1	155532271	155532274	Peak_268	5	-	3.38e-02	55870	ASH1L	5'UTR
chr19	54025068	54025135	Peak_1551	4	+	3.76e-02	55422	ZNF331	5'UTR
chr12	112036252	112036258	Peak_833	8	-	3.78e-08	6311	ATXN2	5'UTR
chr11	85779835	85779871	Peak_632	5	-	3.79e-02	8301	PICALM	5'UTR
chr7	23561970	23562017	Peak_2702	5	-	3.79e-02	29896	TRA2A	5'UTR
chr8	101734190	101734201	Peak_2857	19	-	3.79e-10	26986	PABPC1	5'UTR
chr6	158734927	158734956	Peak_2510	6	+	4.27e-05	56995	TULP4	5'UTR
chr15	96874833	96874835	Peak_1062	8	+	4.29e-02	7026	NR2F2	5'UTR
chr10	126848932	126848942	Peak_456	6	-	4.66e-02	1488	CTBP2	5'UTR
chr16	18937452	18937479	Peak_1231	5	-	4.91e-02	23049	SMG1	5'UTR
chr5	138629558	138629592	Peak_2330	7	+	5.36e-03	9782	MATR3	5'UTR
chr19	49468610	49468633	Peak_1546	18	+	6.00e-06	2512	FTL	5'UTR
chr15	70390071	70390150	Peak_1103	6	-	6.30e-06	7090	TLE3	5'UTR
chr17	38296614	38296664	Peak_1314	6	+	6.35e-04	22794	CASC3	5'UTR
chr1	116916592	116916598	Peak_97	20	+	6.38e-10	476	ATP1A1	5'UTR
chr11	10830304	10830313	Peak_588	13	-	6.48e-05	1982	EIF4G2	5'UTR
chr1	116916054	116916072	Peak_96	13	+	6.88e-07	476	ATP1A1	5'UTR
chr1	116916669	116916699	Peak_98	13	+	6.88e-07	476	ATP1A1	5'UTR
chr12	104324219	104324256	Peak_729	8	+	7.46e-04	100500842	MIR3652	5'UTR
chr12	108934364	108934428	Peak_828	11	-	7.73e-10	9733	SART3	5'UTR
chr19	15442646	15442706	Peak_1583	6	-	7.96e-03	23476	BRD4	5'UTR
chr15	66995408	66995421	Peak_1047	10	+	8.32e-08	4091	SMAD6	5'UTR
chr5	140561196	140561236	Peak_2336	13	+	8.45e-10	57717	PCDHB16	5'UTR
chr11	72433234	72433259	Peak_623	7	-	8.57e-09	116985	ARAP1	5'UTR
chr7	5460959	5460999	Peak_2683	6	-	9.14e-03	84629	TNRC18	5'UTR
chr2	159314428	159314469	Peak_1677	6	+	9.38e-06	8502	PKP4	5'UTR
chr16	29606596	29606639	Peak_1239	5	-	9.43e-05	440354	LOC440354	5'UTR
chr8	101733882	101733907	Peak_2856	12	-	9.46e-04	26986	PABPC1	5'UTR
chr6	53659849	53659890	Peak_2477	4	+	9.58e-03	55227	LRRC1	5'UTR
chr2	178128484	178128539	Peak_1790	6	-	9.60e-06	4780	NFE2L2	5'UTR
chr2	220084556	220084595	Peak_1822	10	-	1.08e-08	79065	ATG9A	5'UTR||3'UTR
chr7	135613854	135613861	Peak_2741	6	-	1.49e-02	136319	MTPN	5'UTR||3'UTR
chr7	135613854	135613861	Peak_2742	6	-	1.49e-02	136319	MTPN	5'UTR||3'UTR
chr17	3512620	3512663	Peak_1358	6	-	1.72e-06	7442	TRPV1	5'UTR||3'UTR
chr2	220084556	220084595	Peak_1821	10	-	2.10e-08	10058	ABCB6	5'UTR||3'UTR
chr17	3512620	3512663	Peak_1357	6	-	6.99e-07	7442	TRPV1	5'UTR||3'UTR
chr16	2819163	2819174	Peak_1124	22	+	1.00e-100	23524	SRRM2	CDS
chr4	1019057	1019078	Peak_2140	26	+	1.00e-100	53834	FGFRL1	CDS
chr15	52652238	52652275	Peak_1084	4	-	1.03e-03	4644	MYO5A	CDS
chr14	31613411	31613451	Peak_971	5	-	1.06e-02	25831	HECTD1	CDS
chr22	31495764	31495807	Peak_1927	4	+	1.08e-02	6525	SMTN	CDS
chr3	138289182	138289218	Peak_2101	4	-	1.12e-02	80321	CEP70	CDS
chr7	148454093	148454145	Peak_2676	5	+	1.12e-02	8454	CUL1	CDS
chr6	110423186	110423197	Peak_2562	6	-	1.15e-03	8936	WASF1	CDS
chr1	90493213	90493237	Peak_77	7	+	1.16e-05	284695	ZNF326	CDS
chr14	102549457	102549459	Peak_1005	16	-	1.16e-09	3320	HSP90AA1	CDS
chr14	102551157	102551193	Peak_1006	21	-	1.16e-09	3320	HSP90AA1	CDS
chr4	187629064	187629093	Peak_2261	5	-	1.17e-02	2195	FAT1	CDS
chr15	42743180	42743217	Peak_1075	13	-	1.17e-09	64397	ZFP106	CDS
chr5	16763619	16763626	Peak_2394	7	-	1.25e-04	4651	MYO10	CDS
chr1	186337044	186337053	Peak_286	4	-	1.26e-02	7175	TPR	CDS
chr2	224845069	224845096	Peak_1829	17	-	1.27e-09	5270	SERPINE2	CDS
chr1	165728777	165728816	Peak_275	5	-	1.31e-03	54499	TMCO1	CDS
chr14	75248460	75248496	Peak_948	6	+	1.31e-04	56252	YLPM1	CDS
chr4	3109012	3109047	Peak_2145	5	+	1.39e-03	3064	HTT	CDS
chr15	35219256	35219290	Peak_1072	4	-	1.42e-02	9716	AQR	CDS
chr8	41467425	41467448	Peak_2784	5	+	1.42e-02	137964	AGPAT6	CDS
chr7	134632314	134632316	Peak_2664	5	+	1.43e-02	800	CALD1	CDS
chr12	6646945	6646968	Peak_671	11	+	1.44e-02	2597	GAPDH	CDS
chr5	70806794	70806844	Peak_2289	7	+	1.48e-03	55814	BDP1	CDS
chr13	42874103	42874177	Peak_855	5	+	1.49e-02	11215	AKAP11	CDS
chr2	216300456	216300494	Peak_1818	14	-	1.49e-09	2335	FN1	CDS
chr10	33218798	33218840	Peak_420	6	-	1.51e-04	3688	ITGB1	CDS
chr16	47533701	47533719	Peak_1178	4	+	1.52e-02	5257	PHKB	CDS
chr2	232325236	232325239	Peak_1830	16	-	1.57e-08	4691	NCL	CDS
chr1	117948219	117948260	Peak_100	6	+	1.59e-05	10905	MAN1A2	CDS
chr6	160230057	160230089	Peak_2513	4	+	1.61e-02	154197	PNLDC1	CDS
chr6	149699950	149699990	Peak_2502	5	+	1.61e-03	23118	TAB2	CDS
chr9	106887253	106887297	Peak_2914	6	+	1.65e-03	10592	SMC2	CDS
chr21	27394252	27394266	Peak_1909	6	-	1.66e-03	351	APP	CDS
chr2	232327912	232327939	Peak_1832	11	-	1.69e-02	4691	NCL	CDS
chr11	8752611	8752668	Peak_581	4	-	1.74e-02	6764	ST5	CDS
chr2	17922948	17922995	Peak_1723	5	-	1.75e-03	79677	SMC6	CDS
chr2	128753959	128753979	Peak_1770	5	-	1.82e-03	79595	SAP130	CDS
chr3	47079208	47079266	Peak_2052	5	-	1.89e-03	29072	SETD2	CDS
chr14	52468518	52468569	Peak_927	7	+	1.91e-06	51637	C14orf166	CDS
chr13	46549727	46549764	Peak_903	13	-	1.91e-09	23091	ZC3H13	CDS
chr5	70806004	70806005	Peak_2288	8	+	1.96e-05	55814	BDP1	CDS
chr11	32956884	32956938	Peak_480	23	+	1.97e-09	79832	QSER1	CDS
chr18	3452144	3452178	Peak_1412	7	+	1.98e-05	7050	TGIF1	CDS
chr19	40433747	40433827	Peak_1591	4	-	2.00e-03	8857	FCGBP	CDS
chr8	131136321	131136347	Peak_2877	8	-	2.04e-05	50807	ASAP1	CDS
chr10	79796974	79797023	Peak_379	7	+	2.16e-06	6229	RPS24	CDS
chr10	22171309	22171368	Peak_413	4	-	2.20e-02	64215	DNAJC1	CDS
chr14	73566383	73566425	Peak_946	6	+	2.21e-03	58517	RBM25	CDS
chr2	170667487	170667538	Peak_1681	7	+	2.29e-05	6741	SSB	CDS
chr9	96238586	96238607	Peak_2911	5	+	2.32e-02	23196	FAM120A	CDS
chrX	24721367	24721400	Peak_3006	6	+	2.32e-06	5422	POLA1	CDS
chr14	56119628	56119635	Peak_930	6	+	2.33e-03	3895	KTN1	CDS
chr1	205589322	205589341	Peak_297	6	-	2.37e-04	2005	ELK4	CDS
chr3	124732356	124732421	Peak_2093	5	-	2.39e-02	57493	HEG1	CDS
chr6	119137140	119137186	Peak_2567	5	-	2.39e-06	254394	MCM9	CDS
chr11	62284493	62284520	Peak_611	5	-	2.40e-03	79026	AHNAK	CDS
chr11	69063800	69063835	Peak_537	6	+	2.47e-02	26579	MYEOV	CDS
chr4	68506910	68506943	Peak_2223	4	-	2.47e-02	55236	UBA6	CDS
chr5	75906872	75906905	Peak_2298	4	+	2.50e-03	10788	IQGAP2	CDS
chr16	30081151	30081155	Peak_1176	6	+	2.57e-02	226	ALDOA	CDS
chr15	66791748	66791788	Peak_1100	6	-	2.63e-02	6124	RPL4	CDS
chr12	45173509	45173514	Peak_785	7	-	2.64e-05	4753	NELL2	CDS
chr13	46577363	46577371	Peak_904	7	-	2.74e-02	23091	ZC3H13	CDS
chr17	64173092	64173136	Peak_1394	5	-	2.89e-05	201134	CEP112	CDS
chr17	7416680	7416686	Peak_1294	9	+	2.92e-05	5430	POLR2A	CDS
chr9	140510575	140510663	Peak_2998	8	-	2.96e-04	85026	C9orf37	CDS
chr14	70237750	70237777	Peak_940	5	+	2.97e-03	6430	SRSF5	CDS
chr8	119122921	119122988	Peak_2867	6	-	2.99e-02	2131	EXT1	CDS
chr1	94337733	94337782	Peak_231	5	-	3.02e-02	30836	DNTTIP2	CDS
chr15	56385959	56385989	Peak_1088	9	-	3.08e-09	64864	RFX7	CDS
chr11	32954257	32954264	Peak_479	7	+	3.14e-02	79832	QSER1	CDS
chr19	39964902	39964910	Peak_1533	6	+	3.26e-04	6829	SUPT5H	CDS
chr11	46515724	46515754	Peak_601	6	-	3.31e-04	55626	AMBRA1	CDS
chr6	151673497	151673502	Peak_2504	4	+	3.39e-02	9590	AKAP12	CDS
chr10	11990366	11990406	Peak_408	5	-	3.42e-03	26019	UPF2	CDS
chr1	89290012	89290070	Peak_74	6	+	3.48e-05	5586	PKN2	CDS
chr14	71413714	71413720	Peak_942	6	+	3.51e-03	22990	PCNX	CDS
chr22	42263131	42263140	Peak_1940	6	+	3.56e-03	6721	SREBF2	CDS
chr2	130915739	130915796	Peak_1771	5	-	3.57e-02	55627	SMPD4	CDS
chr9	20778716	20778753	Peak_2896	4	+	3.59e-02	54914	FOCAD	CDS
chr18	13052938	13052988	Peak_1419	5	+	3.63e-02	55125	CEP192	CDS
chrX	15821824	15821872	Peak_3001	4	+	3.64e-02	8233	ZRSR2	CDS
chr7	22534395	22534446	Peak_2698	5	-	3.69e-02	256227	STEAP1B	CDS
chr7	156956519	156956558	Peak_2679	5	+	3.71e-02	9690	UBE3C	CDS
chr7	92926050	92926110	Peak_2630	4	+	3.71e-03	55610	CCDC132	CDS
chr8	145278013	145278058	Peak_2806	4	+	3.72e-03	727957	HEATR7A	CDS
chr14	45605588	45605602	Peak_921	5	+	3.74e-04	57697	FANCM	CDS
chr15	44624190	44624251	Peak_1022	5	+	3.82e-02	113201	CASC4	CDS
chr15	44673011	44673066	Peak_1023	5	+	3.82e-02	113201	CASC4	CDS
chr8	145278013	145278058	Peak_2807	4	+	3.82e-02	727957	HEATR7A	CDS
chr1	8416226	8416237	Peak_178	8	-	3.85e-07	473	RERE	CDS
chr10	7844241	7844276	Peak_338	14	+	3.88e-10	509	ATP5C1	CDS
chr10	23729461	23729497	Peak_349	6	+	3.90e-02	220213	OTUD1	CDS
chr12	7045613	7045633	Peak_676	9	+	3.96e-04	1822	ATN1	CDS
chr19	34717285	34717315	Peak_1520	6	+	3.99e-03	26065	LSM14A	CDS
chr17	73488813	73488866	Peak_1336	4	+	4.16e-02	9772	KIAA0195	CDS
chr5	112174063	112174114	Peak_2317	5	+	4.33e-03	324	APC	CDS
chr2	238632160	238632219	Peak_1715	5	+	4.36e-03	9208	LRRFIP1	CDS
chr11	92087603	92087627	Peak_549	4	+	4.39e-04	120114	FAT3	CDS
chr1	35654632	35654660	Peak_196	12	-	4.47e-06	6421	SFPQ	CDS
chr9	14842312	14842356	Peak_2949	4	-	4.49e-02	158326	FREM1	CDS
chr14	52957677	52957722	Peak_977	3	-	4.52e-02	57544	TXNDC16	CDS
chr14	102500722	102500740	Peak_959	6	+	4.61e-02	1778	DYNC1H1	CDS
chr11	62655977	62656041	Peak_519	5	+	4.65e-02	6520	SLC3A2	CDS
chr17	80206870	80206905	Peak_1409	6	-	4.81e-03	1453	CSNK1D	CDS
chr16	24942176	24942210	Peak_1236	6	-	4.90e-05	55114	ARHGAP17	CDS
chr11	34112127	34112141	Peak_486	10	+	4.99e-04	4076	CAPRIN1	CDS
chr19	5668222	5668229	Peak_1498	5	+	5.01e-03	6294	SAFB	CDS
chr5	149777921	149777955	Peak_2363	8	+	5.04e-09	6949	TCOF1	CDS
chr2	232325381	232325412	Peak_1831	14	-	5.13e-06	4691	NCL	CDS
chr3	128356732	128356755	Peak_2096	7	-	5.17e-07	6184	RPN1	CDS
chr1	26608849	26608866	Peak_191	5	-	5.20e-04	91544	UBXN11	CDS
chr8	17871490	17871545	Peak_2760	5	+	5.23e-03	5108	PCM1	CDS
chr12	57704150	57704158	Peak_808	5	-	5.27e-03	22864	R3HDM2	CDS
chr11	110128566	110128633	Peak_651	7	-	5.41e-03	5962	RDX	CDS
chr15	66995888	66995949	Peak_1048	9	+	5.51e-06	4091	SMAD6	CDS
chr6	43581400	43581435	Peak_2474	5	+	5.60e-04	5429	POLH	CDS
chr3	39450123	39450167	Peak_1994	10	+	5.74e-03	3921	RPSA	CDS
chr1	84649749	84649812	Peak_68	5	+	6.02e-04	5567	PRKACB	CDS
chr9	110068763	110068786	Peak_2921	8	+	6.10e-05	5887	RAD23B	CDS
chr11	6662631	6662638	Peak_580	6	-	6.14e-07	8642	DCHS1	CDS
chr12	132471125	132471147	Peak_768	5	+	6.16e-03	57634	EP400	CDS
chr4	87706466	87706501	Peak_2175	6	+	6.38e-04	5783	PTPN13	CDS
chr9	33030569	33030583	Peak_2898	6	+	6.38e-04	3301	DNAJA1	CDS
chr2	95774030	95774033	Peak_1757	6	-	6.65e-06	64969	MRPS5	CDS
chr5	137892509	137892537	Peak_2438	7	-	6.83e-03	3313	HSPA9	CDS
chr12	101017897	101017941	Peak_728	5	+	6.83e-04	283431	GAS2L3	CDS
chr12	54976518	54976580	Peak_801	8	-	7.22e-08	5502	PPP1R1A	CDS
chr1	65119502	65119542	Peak_62	5	+	7.39e-03	57685	CACHD1	CDS
chr1	46081067	46081111	Peak_47	8	+	7.47e-05	4678	NASP	CDS
chr13	31221162	31221186	Peak_849	6	+	7.51e-05	10208	USPL1	CDS
chr20	60711929	60711947	Peak_1893	6	-	7.76e-03	5688	PSMA7	CDS
chr1	155691380	155691449	Peak_115	6	+	7.77e-04	7818	DAP3	CDS
chr12	968494	968535	Peak_666	6	+	7.78e-05	65125	WNK1	CDS
chr22	43570510	43570552	Peak_1968	8	-	7.89e-07	23170	TTLL12	CDS
chr2	61577714	61577775	Peak_1742	5	-	7.99e-03	9736	USP34	CDS
chrX	153220075	153220111	Peak_3074	8	-	8.06e-04	3054	HCFC1	CDS
chr2	216240023	216240086	Peak_1817	9	-	8.13e-03	2335	FN1	CDS
chrX	16857975	16858006	Peak_3003	6	+	8.21e-05	55787	TXLNG	CDS
chr10	115644040	115644058	Peak_397	6	+	8.56e-03	374354	NHLRC2	CDS
chr4	37863192	37863201	Peak_2160	6	+	8.73e-06	55276	PGM2	CDS
chr9	79840866	79840903	Peak_2905	5	+	9.12e-04	23230	VPS13A	CDS
chr16	30081151	30081155	Peak_1159	6	+	9.12e-06	226	ALDOA	CDS
chr16	30081151	30081155	Peak_1164	6	+	9.16e-06	226	ALDOA	CDS
chr16	30081151	30081155	Peak_1169	6	+	9.44e-06	226	ALDOA	CDS
chr16	30081151	30081155	Peak_1174	6	+	9.44e-06	226	ALDOA	CDS
chr16	30081151	30081155	Peak_1149	6	+	9.54e-06	226	ALDOA	CDS
chr16	30081151	30081155	Peak_1154	6	+	9.54e-06	226	ALDOA	CDS
chr16	30081151	30081155	Peak_1144	6	+	9.75e-06	226	ALDOA	CDS
chr16	30666385	30666444	Peak_1177	6	+	9.93e-04	78994	PRR14	CDS
chr16	2813217	2813231	Peak_1123	11	+	9.98e-03	23524	SRRM2	CDS
chr13	31035463	31035519	Peak_894	9	-	1.00e-100	3146	HMGB1	CDS||3'UTR
chr6	80626300	80626359	Peak_2547	5	-	1.21e-03	6785	ELOVL4	CDS||3'UTR
chr9	114982643	114982669	Peak_2972	5	-	1.22e-02	9991	PTBP3	CDS||3'UTR
chr1	17312501	17312524	Peak_183	5	-	1.42e-02	23400	ATP13A2	CDS||3'UTR
chr11	46405108	46405128	Peak_502	8	+	1.42e-02	4192	MDK	CDS||3'UTR
chr4	95587171	95587206	Peak_2177	6	+	1.42e-03	10611	PDLIM5	CDS||3'UTR
chr5	40832586	40832609	Peak_2401	15	-	1.56e-10	6167	RPL37	CDS||3'UTR
chr8	29921367	29921409	Peak_2823	4	-	2.27e-02	100616190	MIR548O2	CDS||3'UTR
chr19	1010464	1010481	Peak_1558	8	-	3.03e-02	91304	C19orf6	CDS||3'UTR
chr11	3381747	3381808	Peak_576	5	-	3.11e-02	7748	ZNF195	CDS||3'UTR
chr16	74485942	74485979	Peak_1275	8	-	4.07e-04	2734	GLG1	CDS||3'UTR
chr3	56657305	56657306	Peak_2069	6	-	4.42e-05	23272	FAM208A	CDS||3'UTR
chr12	125263064	125263106	Peak_846	7	-	4.47e-06	949	SCARB1	CDS||3'UTR
chr10	24835169	24835170	Peak_352	6	+	6.85e-06	56243	KIAA1217	CDS||3'UTR
chr15	72491952	72491981	Peak_1106	8	-	7.21e-04	5315	PKM	CDS||3'UTR
chr16	29821484	29821530	Peak_1155	6	+	9.12e-06	4150	MAZ	CDS||3'UTR
chr16	29821484	29821530	Peak_1160	6	+	9.16e-06	4150	MAZ	CDS||3'UTR
chr16	29821484	29821530	Peak_1165	6	+	9.44e-06	4150	MAZ	CDS||3'UTR
chr16	29821484	29821530	Peak_1170	6	+	9.44e-06	4150	MAZ	CDS||3'UTR
chr16	29821484	29821530	Peak_1145	6	+	9.54e-06	4150	MAZ	CDS||3'UTR
chr16	29821484	29821530	Peak_1150	6	+	9.54e-06	4150	MAZ	CDS||3'UTR
chr16	29821484	29821530	Peak_1140	6	+	9.75e-06	4150	MAZ	CDS||3'UTR
chr17	79826326	79826341	Peak_1408	13	-	9.76e-03	396	ARHGDIA	CDS||3'UTR
chr16	68156415	68156418	Peak_1191	9	+	1.00e-100	4775	NFATC3	CDS||5'UTR
chr3	42660499	42660570	Peak_1997	11	+	1.00e-100	4820	NKTR	CDS||5'UTR
chr6	44218140	44218143	Peak_2475	24	+	1.00e-100	3326	HSP90AB1	CDS||5'UTR
chr1	43637788	43637801	Peak_199	4	-	1.27e-02	10969	EBNA1BP2	CDS||5'UTR
chr9	5720184	5720232	Peak_2893	4	+	1.41e-02	57589	KIAA1432	CDS||5'UTR
chr10	30336494	30336531	Peak_416	6	-	1.54e-05	57608	KIAA1462	CDS||5'UTR
chr15	59205696	59205748	Peak_1090	5	-	1.66e-02	79811	SLTM	CDS||5'UTR
chr1	171526629	171526668	Peak_137	6	+	2.29e-02	23215	PRRC2C	CDS||5'UTR
chr1	171527015	171527037	Peak_139	6	+	2.29e-02	23215	PRRC2C	CDS||5'UTR
chr1	29319900	29319924	Peak_27	8	+	2.43e-07	2035	EPB41	CDS||5'UTR
chr6	144178549	144178580	Peak_2500	4	+	2.44e-03	153918	ZC2HC1B	CDS||5'UTR
chr1	171526801	171526823	Peak_138	8	+	2.95e-06	23215	PRRC2C	CDS||5'UTR
chr2	131883333	131883349	Peak_1669	5	+	3.00e-04	55041	PLEKHB2	CDS||5'UTR
chr1	52305952	52305956	Peak_206	10	-	3.01e-08	4898	NRD1	CDS||5'UTR
chr17	61905496	61905540	Peak_1330	8	+	3.11e-04	5705	PSMC5	CDS||5'UTR
chr2	61721068	61721078	Peak_1745	7	-	3.26e-03	7514	XPO1	CDS||5'UTR
chr16	68156545	68156580	Peak_1192	7	+	3.35e-06	4775	NFATC3	CDS||5'UTR
[truncated: 1,076 more rows]

## Sheet: PEAKS sh4
chr	start	end	Peak ID	#supporting tags	strand	adj.pval	Gene ID	Gene symbol	region
chr1	8414669	8414670	Peak_97	8	-	1.00e-100	473	RERE	3'UTR
chr1	10436906	10436950	Peak_1	8	+	2.93e-09	23095	KIF1B	3'UTR
chr1	19585473	19585536	Peak_3	7	+	1.07e-05	51154	MRTO4	3'UTR
chr1	23636592	23636646	Peak_101	5	-	1.17e-03	10236	HNRNPR	3'UTR
chr1	27107654	27107691	Peak_6	8	+	4.42e-09	8289	ARID1A	3'UTR
chr1	29443807	29443827	Peak_9	5	+	1.95e-03	2035	EPB41	3'UTR
chr1	32508652	32508669	Peak_10	6	+	6.75e-04	10657	KHDRBS1	3'UTR
chr1	32638097	32638164	Peak_12	5	+	7.38e-03	23633	KPNA6	3'UTR
chr1	32638216	32638259	Peak_13	6	+	4.14e-05	23633	KPNA6	3'UTR
chr1	36032237	36032277	Peak_14	7	+	1.65e-05	23154	NCDN	3'UTR
chr1	36067853	36067931	Peak_102	9	-	1.23e-09	5690	PSMB2	3'UTR
chr1	36068336	36068400	Peak_103	9	-	1.23e-09	5690	PSMB2	3'UTR
chr1	43167720	43167724	Peak_15	26	+	1.00e-100	4904	YBX1	3'UTR
chr1	43167863	43167870	Peak_16	11	+	7.16e-09	4904	YBX1	3'UTR
chr1	44443905	44443908	Peak_18	18	+	1.00e-100	533	ATP6V0B	3'UTR
chr1	45116553	45116599	Peak_19	7	+	1.00e-100	55182	RNF220	3'UTR
chr1	48762801	48762848	Peak_109	9	-	6.06e-09	54558	SPATA6	3'UTR
chr1	52253854	52253857	Peak_24	53	+	3.63e-09	114883	OSBPL9	3'UTR
chr1	54233154	54233172	Peak_117	6	-	4.75e-07	55706	TMEM48	3'UTR
chr1	60339386	60339417	Peak_25	8	+	6.97e-06	51361	HOOK1	3'UTR
chr1	60340661	60340685	Peak_26	7	+	5.45e-04	51361	HOOK1	3'UTR
chr1	60341005	60341022	Peak_27	7	+	5.45e-04	51361	HOOK1	3'UTR
chr1	61921226	61921260	Peak_29	5	+	2.78e-03	4774	NFIA	3'UTR
chr1	67451506	67451582	Peak_32	7	+	3.76e-07	57708	MIER1	3'UTR
chr1	67874223	67874235	Peak_124	14	-	1.00e-100	26135	SERBP1	3'UTR
chr1	67877312	67877349	Peak_125	12	-	1.10e-12	26135	SERBP1	3'UTR
chr1	68167483	68167532	Peak_126	5	-	5.59e-05	55970	GNG12	3'UTR
chr1	70610707	70610715	Peak_127	5	-	1.64e-05	55631	LRRC40	3'UTR
chr1	85491244	85491279	Peak_129	4	-	3.87e-03	55283	MCOLN3	3'UTR
chr1	87571832	87571894	Peak_36	4	+	1.25e-02	339524	LOC339524	3'UTR
chr1	90061618	90061687	Peak_37	6	+	1.01e-06	23507	LRRC8B	3'UTR
chr1	93619215	93619236	Peak_134	6	-	1.13e-03	50999	TMED5	3'UTR
chr1	94018116	94018169	Peak_41	4	+	1.79e-02	54874	FNBP1L	3'UTR
chr1	102268689	102268698	Peak_137	5	-	3.09e-03	118427	OLFM3	3'UTR
chr1	102268863	102268886	Peak_138	6	-	1.18e-05	118427	OLFM3	3'UTR
chr1	102269378	102269388	Peak_139	8	-	1.00e-100	118427	OLFM3	3'UTR
chr1	109513142	109513167	Peak_140	5	-	1.92e-04	22911	WDR47	3'UTR
chr1	110135609	110135626	Peak_44	5	+	4.30e-03	2773	GNAI3	3'UTR
chr1	110566213	110566281	Peak_45	7	+	4.41e-06	10768	AHCYL1	3'UTR
chr1	113212986	113213016	Peak_46	5	+	2.90e-03	829	CAPZA1	3'UTR
chr1	115259895	115259931	Peak_143	10	-	1.10e-12	7812	CSDE1	3'UTR
chr1	115260107	115260115	Peak_144	7	-	3.05e-04	7812	CSDE1	3'UTR
chr1	116947325	116947337	Peak_48	8	+	5.48e-03	476	ATP1A1	3'UTR
chr1	118066101	118066119	Peak_49	6	+	1.35e-08	10905	MAN1A2	3'UTR
chr1	120455818	120455841	Peak_145	4	-	3.59e-02	4853	NOTCH2	3'UTR
chr1	120456339	120456371	Peak_146	6	-	1.65e-07	4853	NOTCH2	3'UTR
chr1	147097375	147097408	Peak_51	4	+	1.43e-05	607	BCL9	3'UTR
chr1	147097375	147097408	Peak_53	4	+	2.88e-03	607	BCL9	3'UTR
chr1	153954343	153954367	Peak_150	16	-	1.00e-100	5872	RAB13	3'UTR
chr1	154129064	154129080	Peak_151	6	-	4.80e-04	7170	TPM3	3'UTR
chr1	154243066	154243104	Peak_55	7	+	6.70e-07	9898	UBAP2L	3'UTR
chr1	156712047	156712105	Peak_156	7	-	3.01e-05	3068	HDGF	3'UTR
chr1	159887990	159888028	Peak_157	6	-	1.06e-02	8407	TAGLN2	3'UTR
chr1	162496601	162496660	Peak_62	9	+	5.54e-10	127933	UHMK1	3'UTR
chr1	166822920	166822944	Peak_64	5	+	4.17e-04	57645	POGK	3'UTR
chr1	167758447	167758482	Peak_65	5	+	2.16e-04	9019	MPZL1	3'UTR
chr1	171562561	171562591	Peak_68	5	+	1.25e-02	23215	PRRC2C	3'UTR
chr1	172579784	172579813	Peak_70	4	+	1.14e-03	51430	C1orf9	3'UTR
chr1	179044873	179044916	Peak_72	4	+	4.79e-02	9917	FAM20B	3'UTR
chr1	179325989	179326034	Peak_73	9	+	1.00e-100	6646	SOAT1	3'UTR
chr1	179326284	179326329	Peak_74	6	+	3.58e-05	6646	SOAT1	3'UTR
chr1	179327045	179327072	Peak_75	5	+	6.47e-03	6646	SOAT1	3'UTR
chr1	179812617	179812665	Peak_160	6	-	3.35e-04	163590	TOR1AIP2	3'UTR
chr1	179814803	179814862	Peak_161	6	-	3.35e-04	163590	TOR1AIP2	3'UTR
chr1	180854428	180854485	Peak_78	5	+	8.09e-05	9213	XPR1	3'UTR
chr1	182352382	182352384	Peak_162	5	-	9.05e-03	2752	GLUL	3'UTR
chr1	201790649	201790675	Peak_85	6	+	3.97e-06	89796	NAV1	3'UTR
chr1	205684136	205684148	Peak_166	7	-	3.65e-04	64710	NUCKS1	3'UTR
chr1	206635245	206635261	Peak_90	15	+	2.08e-09	23380	SRGAP2	3'UTR
chr1	220231232	220231303	Peak_168	5	-	1.04e-04	10380	BPNT1	3'UTR
chr1	225684463	225684527	Peak_172	6	-	1.20e-05	55740	ENAH	3'UTR
chr1	227181538	227181594	Peak_175	4	-	3.40e-03	8476	CDC42BPA	3'UTR
chr1	235611496	235611553	Peak_178	5	-	1.07e-05	148789	B3GALNT2	3'UTR
chr1	245017186	245017191	Peak_179	8	-	6.11e-03	3192	HNRNPU	3'UTR
chr10	15253783	15253825	Peak_206	6	-	6.22e-07	221061	FAM171A1	3'UTR
chr10	17279378	17279412	Peak_184	11	+	1.91e-09	7431	VIM	3'UTR
chr10	30599430	30599518	Peak_210	6	-	1.39e-07	55149	MTPAP	3'UTR
chr10	51592389	51592417	Peak_213	4	-	3.54e-05	8505	PARG	3'UTR
chr10	51592389	51592417	Peak_214	4	-	1.81e-02	8505	PARG	3'UTR
chr10	70743557	70743607	Peak_193	6	+	3.57e-03	9188	DDX21	3'UTR
chr10	70744511	70744527	Peak_194	6	+	3.57e-03	9188	DDX21	3'UTR
chr10	74127337	74127388	Peak_221	4	-	1.63e-03	100302155	MIR1256	3'UTR
chr10	74127769	74127803	Peak_222	4	-	1.63e-03	10367	MICU1	3'UTR
chr10	75009892	75009968	Peak_223	11	-	6.41e-07	51021	MRPS16	3'UTR
chr10	75010080	75010089	Peak_224	13	-	4.08e-10	51021	MRPS16	3'UTR
chr10	75878221	75878224	Peak_195	5	+	4.07e-03	7414	VCL	3'UTR
chr10	75879761	75879797	Peak_196	5	+	4.07e-03	7414	VCL	3'UTR
chr10	98983830	98983861	Peak_227	5	-	4.36e-04	84986	ARHGAP19	3'UTR
chr10	98983830	98983861	Peak_229	5	-	6.59e-03	100533184	ARHGAP19-SLIT1	3'UTR
chr10	101992861	101992935	Peak_231	6	-	4.65e-06	55280	CWF19L1	3'UTR
chr10	102123309	102123325	Peak_200	10	+	2.13e-05	6319	SCD	3'UTR
chr10	116194723	116194735	Peak_233	4	-	3.21e-04	3983	ABLIM1	3'UTR
chr11	768424	768483	Peak_302	9	-	5.81e-07	347862	PDDC1	3'UTR
chr11	1774182	1774206	Peak_303	4	-	3.87e-02	1509	CTSD	3'UTR
chr11	9467257	9467288	Peak_244	6	+	2.04e-05	10527	IPO7	3'UTR
chr11	13752062	13752092	Peak_247	4	+	2.42e-02	84188	FAR1	3'UTR
chr11	18428937	18428953	Peak_248	7	+	7.21e-04	3939	LDHA	3'UTR
chr11	18429067	18429085	Peak_249	10	+	2.12e-09	3939	LDHA	3'UTR
chr11	18429189	18429267	Peak_250	6	+	3.73e-02	3939	LDHA	3'UTR
chr11	28354838	28354915	Peak_252	4	+	1.71e-02	196074	METTL15	3'UTR
chr11	32126230	32126261	Peak_253	5	+	7.48e-07	5954	RCN1	3'UTR
chr11	32126663	32126708	Peak_254	4	+	9.02e-04	5954	RCN1	3'UTR
chr11	32999177	32999185	Peak_256	7	+	1.92e-04	79832	QSER1	3'UTR
chr11	32999547	32999548	Peak_257	6	+	1.60e-02	79832	QSER1	3'UTR
chr11	34121716	34121730	Peak_258	19	+	1.00e-100	4076	CAPRIN1	3'UTR
chr11	34122259	34122272	Peak_259	12	+	1.00e-100	4076	CAPRIN1	3'UTR
chr11	43876930	43876946	Peak_262	7	+	1.18e-07	51144	HSD17B12	3'UTR
chr11	43877209	43877217	Peak_263	6	+	3.20e-05	51144	HSD17B12	3'UTR
chr11	43878135	43878157	Peak_264	6	+	3.20e-05	51144	HSD17B12	3'UTR
chr11	44955875	44955883	Peak_313	35	-	1.00e-100	9537	TP53I11	3'UTR
chr11	47491850	47491892	Peak_321	6	-	1.04e-02	10658	CELF1	3'UTR
chr11	58385527	58385550	Peak_271	6	+	4.41e-05	386607	ZFP91-CNTF	3'UTR
chr11	58385527	58385550	Peak_272	6	+	7.02e-05	80829	ZFP91	3'UTR
chr11	60689988	60690008	Peak_273	7	+	2.62e-03	79073	TMEM109	3'UTR
chr11	61633180	61633208	Peak_274	6	+	4.45e-04	9415	FADS2	3'UTR
chr11	61633381	61633386	Peak_275	7	+	3.25e-06	9415	FADS2	3'UTR
chr11	62392684	62392699	Peak_324	8	-	9.23e-06	23193	GANAB	3'UTR
chr11	62656202	62656223	Peak_276	5	+	3.61e-02	6520	SLC3A2	3'UTR
chr11	63525909	63525926	Peak_279	7	+	1.06e-06	10313	RTN3	3'UTR
chr11	65622500	65622512	Peak_328	13	-	1.70e-06	1072	CFL1	3'UTR
chr11	65622617	65622634	Peak_329	11	-	5.66e-04	1072	CFL1	3'UTR
chr11	66413634	66413701	Peak_283	6	+	2.41e-02	5936	RBM4	3'UTR
chr11	66413634	66413701	Peak_284	6	+	1.37e-03	5936	RBM4	3'UTR
chr11	69467209	69467217	Peak_288	25	+	2.74e-09	595	CCND1	3'UTR
chr11	69467561	69467563	Peak_289	188	+	2.29e-10	595	CCND1	3'UTR
chr11	69468290	69468296	Peak_290	19	+	9.17e-04	595	CCND1	3'UTR
chr11	70281370	70281406	Peak_291	9	+	1.00e-100	2017	CTTN	3'UTR
chr11	73388069	73388072	Peak_332	6	-	1.63e-06	5870	RAB6A	3'UTR
chr11	74972208	74972249	Peak_333	46	-	1.00e-100	408	ARRB1	3'UTR
chr11	94151522	94151570	Peak_343	5	-	6.55e-06	4361	MRE11A	3'UTR
chr11	102101737	102101771	Peak_296	7	+	1.26e-08	10413	YAP1	3'UTR
chr11	102267407	102267431	Peak_344	7	-	5.25e-06	114908	TMEM123	3'UTR
chr11	102268111	102268129	Peak_345	8	-	3.49e-08	114908	TMEM123	3'UTR
chr11	102269465	102269478	Peak_346	6	-	6.80e-04	114908	TMEM123	3'UTR
chr11	102927237	102927270	Peak_347	5	-	2.28e-04	84259	DCUN1D5	3'UTR
chr11	107662234	107662255	Peak_348	5	-	8.85e-03	54733	SLC35F2	3'UTR
chr11	110100681	110100722	Peak_350	5	-	2.55e-02	5962	RDX	3'UTR
chr11	110101308	110101359	Peak_351	6	-	1.64e-04	5962	RDX	3'UTR
chr11	110101957	110101995	Peak_352	6	-	1.64e-04	5962	RDX	3'UTR
chr11	111609610	111609639	Peak_353	18	-	1.00e-100	5519	PPP2R1B	3'UTR
chr11	113146190	113146235	Peak_300	15	+	1.00e-100	4684	NCAM1	3'UTR
chr11	118619865	118619894	Peak_354	6	-	2.11e-04	1656	DDX6	3'UTR
chr11	120359667	120359668	Peak_301	6	+	7.51e-06	23365	ARHGEF12	3'UTR
chr12	6879905	6879907	Peak_361	14	+	3.02e-09	5763	PTMS	3'UTR
chr12	12046753	12046806	Peak_362	9	+	1.00e-100	2120	ETV6	3'UTR
chr12	24964815	24964831	Peak_403	7	-	1.99e-06	586	BCAT1	3'UTR
chr12	24965677	24965687	Peak_404	5	-	4.75e-02	586	BCAT1	3'UTR
chr12	24967349	24967398	Peak_405	5	-	4.75e-02	586	BCAT1	3'UTR
chr12	24969118	24969140	Peak_406	6	-	3.37e-04	586	BCAT1	3'UTR
chr12	46576868	46576948	Peak_408	5	-	1.74e-03	81539	SLC38A1	3'UTR
chr12	50038867	50038897	Peak_409	8	-	1.00e-100	91010	FMNL3	3'UTR
chr12	50158406	50158409	Peak_365	7	+	1.78e-04	7009	TMBIM6	3'UTR
chr12	53873461	53873466	Peak_366	13	+	1.00e-100	5094	PCBP2	3'UTR
chr12	53873555	53873579	Peak_367	7	+	1.15e-04	5094	PCBP2	3'UTR
chr12	54625184	54625214	Peak_412	14	-	1.69e-09	100616400	MIR3198-2	3'UTR
chr12	54789132	54789143	Peak_413	6	-	3.20e-05	3678	ITGA5	3'UTR
chr12	56636544	56636550	Peak_416	7	-	5.83e-04	283373	ANKRD52	3'UTR
chr12	56991837	56991858	Peak_417	8	-	4.74e-08	11176	BAZ2A	3'UTR
chr12	69237925	69237930	Peak_374	6	+	1.47e-03	4193	MDM2	3'UTR
chr12	69666649	69666695	Peak_375	5	+	2.88e-02	11052	CPSF6	3'UTR
chr12	76440534	76440554	Peak_418	7	-	1.63e-04	4673	NAP1L1	3'UTR
chr12	76747785	76747848	Peak_420	4	-	2.17e-02	114882	OSBPL8	3'UTR
chr12	78605254	78605324	Peak_378	4	+	3.93e-04	89795	NAV3	3'UTR
chr12	88591558	88591596	Peak_381	4	+	2.23e-02	160418	TMTC3	3'UTR
chr12	93803537	93803599	Peak_423	6	-	3.19e-05	7334	UBE2N	3'UTR
chr12	93896020	93896065	Peak_382	5	+	2.31e-04	28977	MRPL42	3'UTR
chr12	100733571	100733604	Peak_383	4	+	4.21e-02	55681	SCYL2	3'UTR
chr12	102790536	102790574	Peak_424	5	-	2.68e-03	3479	IGF1	3'UTR
chr12	102792887	102792911	Peak_425	18	-	1.00e-100	3479	IGF1	3'UTR
chr12	106631745	106631804	Peak_426	6	-	8.75e-03	10970	CKAP4	3'UTR
chr12	109040061	109040112	Peak_427	4	-	3.35e-02	23603	CORO1C	3'UTR
chr12	110784378	110784381	Peak_386	10	+	1.00e-100	488	ATP2A2	3'UTR
chr12	110784739	110784742	Peak_387	6	+	4.10e-03	488	ATP2A2	3'UTR
chr12	112946084	112946094	Peak_389	5	+	8.75e-03	5781	PTPN11	3'UTR
chr12	117646204	117646217	Peak_433	12	-	1.00e-100	4842	NOS1	3'UTR
chr12	124081431	124081440	Peak_393	8	+	1.32e-03	10959	TMED2	3'UTR
chr12	124082278	124082284	Peak_394	9	+	3.50e-05	10959	TMED2	3'UTR
chr12	124499147	124499197	Peak_395	4	+	1.71e-03	100533183	ZNF664-FAM101A	3'UTR
chr13	21949197	21949249	Peak_455	65	-	1.00e-100	253832	ZDHHC20	3'UTR
chr13	30779853	30779916	Peak_456	7	-	2.87e-08	84056	KATNAL1	3'UTR
chr13	30780014	30780075	Peak_457	8	-	1.00e-100	84056	KATNAL1	3'UTR
chr13	31034199	31034236	Peak_458	4	-	2.09e-02	3146	HMGB1	3'UTR
chr13	31034316	31034329	Peak_459	4	-	2.09e-02	3146	HMGB1	3'UTR
chr13	37420530	37420612	Peak_462	5	-	2.47e-03	4093	SMAD9	3'UTR
chr13	39917752	39917757	Peak_465	38	-	1.00e-100	10186	LHFP	3'UTR
chr13	50274600	50274616	Peak_467	7	-	1.00e-100	3839	KPNA3	3'UTR
chr13	52988274	52988317	Peak_468	5	-	3.24e-04	51028	VPS36	3'UTR
chr13	95059220	95059222	Peak_447	4	+	5.59e-03	10082	GPC6	3'UTR
chr13	100638177	100638242	Peak_449	7	+	4.09e-02	7546	ZIC2	3'UTR
chr13	113977030	113977032	Peak_452	15	+	4.50e-10	3916	LAMP1	3'UTR
chr14	21990528	21990543	Peak_500	5	-	2.41e-02	6297	SALL2	3'UTR
chr14	35551556	35551624	Peak_471	4	+	4.89e-02	283635	FAM177A1	3'UTR
chr14	51189443	51189474	Peak_511	4	-	2.58e-02	51199	NIN	3'UTR
chr14	51721764	51721777	Peak_474	7	+	3.89e-05	81542	TMX1	3'UTR
chr14	51721940	51721991	Peak_475	6	+	3.18e-03	81542	TMX1	3'UTR
chr14	55532243	55532281	Peak_477	6	+	2.60e-02	93487	MAPK1IP1L	3'UTR
chr14	59015340	59015376	Peak_479	5	+	1.04e-06	9786	KIAA0586	3'UTR
chr14	64151180	64151228	Peak_513	5	-	4.57e-04	81537	SGPP1	3'UTR
chr14	65542397	65542432	Peak_514	5	-	4.28e-05	4149	MAX	3'UTR
chr14	69847053	69847090	Peak_515	6	-	2.28e-05	2079	ERH	3'UTR
chr14	89079175	89079220	Peak_486	4	+	3.28e-02	79882	ZC3H14	3'UTR
chr14	91924473	91924519	Peak_517	9	-	9.05e-10	55671	SMEK1	3'UTR
chr14	95556731	95556773	Peak_518	6	-	5.16e-06	23405	DICER1	3'UTR
chr14	102965372	102965393	Peak_490	5	+	5.73e-08	9895	TECPR2	3'UTR
chr15	40328402	40328430	Peak_562	9	-	5.73e-06	6727	SRP14	3'UTR
chr15	41672518	41672540	Peak_533	6	+	2.78e-05	51203	NUSAP1	3'UTR
chr15	42824286	42824317	Peak_534	5	+	2.09e-02	8773	SNAP23	3'UTR
chr15	43235932	43235991	Peak_563	4	-	1.45e-03	197131	UBR1	3'UTR
chr15	45010180	45010187	Peak_537	35	+	1.14e-10	567	B2M	3'UTR
chr15	45366574	45366617	Peak_539	5	+	2.28e-03	6652	SORD	3'UTR
chr15	52203071	52203123	Peak_540	6	+	1.68e-06	29766	TMOD3	3'UTR
chr15	58888616	58888675	Peak_566	4	-	4.86e-04	102	ADAM10	3'UTR
chr15	62144590	62144621	Peak_567	4	-	2.17e-02	54832	VPS13C	3'UTR
chr15	64448116	64448156	Peak_570	8	-	1.16e-07	5479	PPIB	3'UTR
chr15	64658026	64658061	Peak_573	6	-	4.39e-06	9768	KIAA0101	3'UTR
chr15	64658026	64658061	Peak_574	6	-	6.93e-05	53944	CSNK1G1	3'UTR
chr15	65869813	65869819	Peak_543	14	+	1.00e-100	51495	PTPLAD1	3'UTR
chr15	66841286	66841311	Peak_544	5	+	1.75e-04	55055	ZWILCH	3'UTR
chr15	66841386	66841424	Peak_545	4	+	4.85e-02	55055	ZWILCH	3'UTR
chr15	72491473	72491487	Peak_576	7	-	4.01e-05	5315	PKM	3'UTR
chr15	91044420	91044427	Peak_552	5	+	1.15e-03	8826	IQGAP1	3'UTR
chr16	4739781	4739834	Peak_586	6	+	5.53e-04	23295	MGRN1	3'UTR
chr16	4740604	4740623	Peak_587	16	+	1.13e-09	23295	MGRN1	3'UTR
chr16	10623742	10623818	Peak_638	4	-	2.98e-02	2013	EMP2	3'UTR
chr16	11444864	11444932	Peak_591	5	+	4.91e-07	116028	RMI2	3'UTR
chr16	18803383	18803416	Peak_641	10	-	3.11e-05	23204	ARL6IP1	3'UTR
chr16	18804264	18804296	Peak_642	11	-	9.93e-07	23204	ARL6IP1	3'UTR
chr16	20746801	20746862	Peak_644	6	-	2.15e-03	55623	THUMPD1	3'UTR
chr16	23582546	23582568	Peak_593	6	+	1.10e-04	56061	UBFD1	3'UTR
chr16	24226273	24226301	Peak_595	12	+	1.00e-100	5579	PRKCB	3'UTR
chr16	24226961	24226986	Peak_596	8	+	6.59e-09	5579	PRKCB	3'UTR
chr16	24231004	24231014	Peak_597	65	+	1.00e-100	5579	PRKCB	3'UTR
chr16	29821997	29822030	Peak_600	8	+	1.00e-100	4150	MAZ	3'UTR
chr16	29821997	29822030	Peak_602	8	+	1.00e-100	4150	MAZ	3'UTR
chr16	29821997	29822030	Peak_604	8	+	1.00e-100	4150	MAZ	3'UTR
chr16	29821997	29822030	Peak_606	8	+	1.00e-100	4150	MAZ	3'UTR
chr16	29821997	29822030	Peak_608	8	+	1.00e-100	4150	MAZ	3'UTR
chr16	29821997	29822030	Peak_610	8	+	1.00e-100	4150	MAZ	3'UTR
chr16	29821997	29822030	Peak_612	8	+	1.00e-100	4150	MAZ	3'UTR
chr16	29821997	29822030	Peak_614	8	+	4.22e-02	4150	MAZ	3'UTR
chr16	30614866	30614898	Peak_651	5	-	4.50e-02	115509	ZNF689	3'UTR
chr16	46614843	46614911	Peak_652	4	-	8.13e-03	79801	SHCBP1	3'UTR
chr16	48574224	48574285	Peak_653	4	-	2.82e-03	9683	N4BP1	3'UTR
chr16	66757216	66757233	Peak_659	5	-	1.06e-02	1783	DYNC1LI2	3'UTR
chr16	67133498	67133537	Peak_617	5	+	2.24e-02	865	CBFB	3'UTR
chr16	67133801	67133861	Peak_618	8	+	4.92e-09	865	CBFB	3'UTR
chr16	67671854	67671930	Peak_619	5	+	1.49e-04	10664	CTCF	3'UTR
chr16	69336774	69336842	Peak_621	5	+	1.99e-04	6645	SNTB2	3'UTR
chr16	70406989	70407068	Peak_624	4	+	2.52e-03	55308	DDX19A	3'UTR
chr16	70414693	70414793	Peak_660	5	-	2.89e-04	6483	ST3GAL2	3'UTR
chr16	74482233	74482275	Peak_663	7	-	1.83e-05	2734	GLG1	3'UTR
chr16	84599347	84599377	Peak_670	4	-	2.95e-02	23406	COTL1	3'UTR
chr16	87865610	87865614	Peak_672	7	-	3.29e-02	8140	SLC7A5	3'UTR
chr17	1248012	1248018	Peak_718	11	-	1.00e-100	7531	YWHAE	3'UTR
chr17	1248212	1248227	Peak_719	12	-	1.00e-100	7531	YWHAE	3'UTR
chr17	1838971	1839036	Peak_720	9	-	1.00e-100	146760	RTN4RL1	3'UTR
chr17	2287870	2287907	Peak_722	7	-	7.77e-04	4335	MNT	3'UTR
chr17	4927576	4927595	Peak_675	14	+	1.00e-100	10749	KIF1C	3'UTR
chr17	7215435	7215448	Peak_676	12	+	1.54e-07	1984	EIF5A	3'UTR
chr17	7482025	7482043	Peak_678	8	+	4.49e-03	1973	EIF4A1	3'UTR
chr17	11464664	11464667	Peak_680	6	+	2.48e-06	388336	SHISA6	3'UTR
chr17	14110928	14110963	Peak_681	5	+	6.79e-06	1352	COX10	3'UTR
chr17	16344905	16344948	Peak_682	8	+	2.82e-08	125144	C17orf76-AS1	3'UTR
chr17	26936978	26937082	Peak_724	6	-	1.86e-06	124923	SGK494	3'UTR
chr17	45760658	45760691	Peak_699	8	+	6.35e-09	3837	KPNB1	3'UTR
chr17	47132447	47132454	Peak_700	8	+	1.27e-05	10642	IGF2BP1	3'UTR
chr17	53470869	53470884	Peak_735	5	-	1.46e-03	23531	MMD	3'UTR
chr17	57771397	57771442	Peak_704	5	+	2.71e-03	1213	CLTC	3'UTR
chr17	59943673	59943729	Peak_737	7	-	1.00e-100	57508	INTS2	3'UTR
chr17	66527046	66527076	Peak_709	7	+	1.89e-06	5573	PRKAR1A	3'UTR
chr17	73000525	73000596	Peak_710	6	+	4.29e-05	30850	CDR2L	3'UTR
chr17	76203192	76203247	Peak_712	4	+	3.12e-02	125061	AFMID	3'UTR
chr17	79477132	79477140	Peak_740	22	-	1.00e-100	71	ACTG1	3'UTR
chr17	79801294	79801337	Peak_741	7	-	1.36e-04	5034	P4HB	3'UTR
chr18	3278095	3278128	Peak_744	6	+	1.35e-04	103910	MYL12B	3'UTR
chr18	12985813	12985834	Peak_746	6	+	4.16e-05	81929	SEH1L	3'UTR
chr18	19448352	19448423	Peak_748	5	+	5.43e-04	57534	MIB1	3'UTR
chr18	29709558	29709613	Peak_750	4	+	1.63e-02	51444	RNF138	3'UTR
chr18	43845539	43845574	Peak_751	4	+	3.50e-03	147339	C18orf25	3'UTR
chr18	47919136	47919199	Peak_753	11	+	1.00e-100	220134	SKA1	3'UTR
chr18	52892413	52892428	Peak_763	5	-	3.07e-05	6925	TCF4	3'UTR
chr18	55268399	55268401	Peak_765	5	-	1.19e-02	4677	NARS	3'UTR
chr18	56996988	56996992	Peak_766	8	-	5.13e-06	3998	LMAN1	3'UTR
chr18	60998032	60998054	Peak_768	10	-	5.71e-05	2531	KDSR	3'UTR
chr18	60998538	60998539	Peak_769	121	-	1.00e-100	2531	KDSR	3'UTR
chr19	582963	582965	Peak_770	63	+	1.00e-100	682	BSG	3'UTR
chr19	811898	811917	Peak_772	10	+	8.67e-05	5725	PTBP1	3'UTR
chr19	1258815	1258827	Peak_773	14	+	1.81e-10	90007	MIDN	3'UTR
chr19	3465149	3465170	Peak_781	7	+	1.69e-02	4782	NFIC	3'UTR
chr19	3466069	3466120	Peak_782	7	+	1.69e-02	4782	NFIC	3'UTR
chr19	3468797	3468808	Peak_783	13	+	1.00e-100	4782	NFIC	3'UTR
chr19	3976513	3976532	Peak_822	15	-	3.21e-10	1938	EEF2	3'UTR
chr19	4038066	4038107	Peak_785	7	+	3.87e-05	51588	PIAS4	3'UTR
chr19	4657837	4657870	Peak_823	5	-	1.41e-02	56005	C19orf10	3'UTR
chr19	4961906	4961942	Peak_786	6	+	6.25e-04	29128	UHRF1	3'UTR
chr19	6414019	6414028	Peak_828	10	-	3.51e-07	8570	KHSRP	3'UTR
chr19	9964548	9964580	Peak_830	9	-	1.00e-100	93145	OLFM2	3'UTR
chr19	13054961	13054977	Peak_790	27	+	1.00e-100	811	CALR	3'UTR
chr19	13055205	13055225	Peak_791	16	+	2.38e-07	811	CALR	3'UTR
chr19	13265230	13265267	Peak_792	9	+	1.16e-03	9592	IER2	3'UTR
chr19	17431946	17432014	Peak_796	6	+	9.04e-05	79016	DDA1	3'UTR
chr19	21368280	21368331	Peak_799	5	+	4.51e-04	170959	ZNF431	3'UTR
chr19	34891962	34892010	Peak_800	7	+	4.99e-03	2821	GPI	3'UTR
chr19	34892734	34892773	Peak_801	9	+	1.57e-06	2821	GPI	3'UTR
chr19	37236064	37236094	Peak_835	6	-	1.87e-07	342892	ZNF850	3'UTR
chr19	39220753	39220781	Peak_803	15	+	1.00e-100	81	ACTN4	3'UTR
chr19	39327208	39327249	Peak_836	9	-	1.00e-100	3191	HNRNPL	3'UTR
chr19	41812928	41812970	Peak_804	7	+	1.96e-05	11100	HNRNPUL1	3'UTR
chr19	41938564	41938578	Peak_837	10	-	2.05e-09	55101	ATP5SL	3'UTR
chr19	44047471	44047515	Peak_839	14	-	5.53e-10	7515	XRCC1	3'UTR
chr19	44126775	44126783	Peak_840	4	-	4.94e-02	199731	CADM4	3'UTR
chr19	46029651	46029653	Peak_806	6	+	1.84e-03	7408	VASP	3'UTR
chr19	47112579	47112618	Peak_807	8	+	2.78e-04	808	CALM3	3'UTR
chr19	47223210	47223234	Peak_843	6	-	1.83e-04	29888	STRN4	3'UTR
chr19	47507178	47507214	Peak_808	7	+	5.92e-09	2909	ARHGAP35	3'UTR
chr19	48885975	48885997	Peak_844	10	-	1.13e-08	10945	KDELR1	3'UTR
chr19	54378494	54378531	Peak_813	9	+	2.93e-06	91663	MYADM	3'UTR
chr19	56185966	56185978	Peak_814	7	+	1.96e-06	11338	U2AF2	3'UTR
chr19	59061981	59062000	Peak_818	10	+	3.56e-06	10155	TRIM28	3'UTR
chr2	5834809	5834845	Peak_849	8	+	2.41e-03	6664	SOX11	3'UTR
chr2	9725115	9725128	Peak_910	7	-	1.10e-07	10971	YWHAQ	3'UTR
chr2	16731515	16731582	Peak_913	6	-	3.61e-06	81553	FAM49A	3'UTR
chr2	24991773	24991808	Peak_855	4	+	2.01e-04	8648	NCOA1	3'UTR
chr2	27170930	27170932	Peak_857	20	+	1.00e-100	56896	DPYSL5	3'UTR
chr2	29024304	29024363	Peak_858	11	+	1.00e-100	5500	PPP1CB	3'UTR
chr2	29024304	29024363	Peak_859	11	+	1.17e-09	245711	SPDYA	3'UTR
chr2	31489638	31489699	Peak_863	4	+	2.70e-03	30845	EHD3	3'UTR
chr2	54895821	54895831	Peak_866	7	+	3.68e-09	6711	SPTBN1	3'UTR
chr2	55516918	55516936	Peak_918	6	-	6.72e-07	55704	CCDC88A	3'UTR
chr2	65250411	65250428	Peak_868	9	+	1.00e-100	6509	SLC1A4	3'UTR
chr2	65539062	65539131	Peak_922	5	-	2.48e-04	200734	SPRED2	3'UTR
chr2	69472865	69472899	Peak_870	5	+	1.20e-03	84168	ANTXR1	3'UTR
chr2	69475908	69475965	Peak_871	5	+	1.20e-03	84168	ANTXR1	3'UTR
chr2	75120163	75120204	Peak_873	13	+	1.04e-09	3099	HK2	3'UTR
chr2	87004468	87004515	Peak_875	9	+	1.00e-100	64795	RMND5A	3'UTR
chr2	106510433	106510442	Peak_880	4	+	6.54e-03	8440	NCK2	3'UTR
chr2	109302052	109302063	Peak_881	5	+	4.19e-04	3987	LIMS1	3'UTR
chr2	112876820	112876836	Peak_882	4	+	2.37e-02	84910	TMEM87B	3'UTR
chr2	120935579	120935635	Peak_883	5	+	5.32e-07	57669	EPB41L5	3'UTR
chr2	128064373	128064443	Peak_933	5	-	1.30e-03	10746	MAP3K2	3'UTR
chr2	128950022	128950053	Peak_885	6	+	1.78e-05	56886	UGGT1	3'UTR
chr2	145144586	145144655	Peak_940	8	-	1.00e-100	9839	ZEB2	3'UTR
chr2	160176605	160176654	Peak_943	5	-	1.17e-06	29994	BAZ2B	3'UTR
chr2	166538940	166539000	Peak_893	6	+	5.27e-08	80034	CSRNP3	3'UTR
chr2	172179191	172179267	Peak_946	5	-	2.74e-05	79828	METTL8	3'UTR
chr2	176793220	176793239	Peak_950	11	-	1.32e-09	80856	KIAA1715	3'UTR
chr2	178404742	178404779	Peak_896	6	+	2.59e-09	8540	AGPS	3'UTR
chr2	188330347	188330420	Peak_953	6	-	7.11e-08	7035	TFPI	3'UTR
chr2	191798923	191798948	Peak_899	5	+	3.74e-03	2744	GLS	3'UTR
chr2	202245139	202245170	Peak_955	8	-	1.00e-100	66008	TRAK2	3'UTR
chr2	203071843	203071887	Peak_956	6	-	4.00e-05	7341	SUMO1	3'UTR
chr2	206859344	206859386	Peak_959	4	-	2.08e-02	54891	INO80D	3'UTR
chr2	207945772	207945806	Peak_960	4	-	2.76e-03	8609	KLF7	3'UTR
chr2	208466026	208466071	Peak_900	4	+	1.44e-02	1385	CREB1	3'UTR
chr2	211296714	211296761	Peak_961	4	-	4.50e-02	10314	LANCL1	3'UTR
chr2	211298590	211298650	Peak_962	4	-	4.50e-02	10314	LANCL1	3'UTR
chr2	217070845	217070847	Peak_902	4	+	4.90e-02	7520	XRCC5	3'UTR
chr2	217123222	217123254	Peak_970	5	-	6.82e-07	57574	MARCH4	3'UTR
chr2	232319552	232319569	Peak_972	16	-	1.65e-10	4691	NCL	3'UTR
chr2	242168717	242168725	Peak_974	7	-	4.39e-07	3069	HDLBP	3'UTR
chr20	1349749	1349755	Peak_995	6	-	4.15e-06	2280	FKBP1A	3'UTR
chr20	1349749	1349755	Peak_996	6	-	1.89e-03	2280	FKBP1A	3'UTR
chr20	3628265	3628275	Peak_977	8	+	1.00e-100	8455	ATRN	3'UTR
chr20	4681139	4681140	Peak_978	12	+	1.00e-100	5621	PRNP	3'UTR
chr20	4835038	4835048	Peak_998	5	-	1.16e-05	9962	SLC23A2	3'UTR
chr20	5975128	5975151	Peak_980	24	+	1.00e-100	84515	MCM8	3'UTR
chr20	17464543	17464562	Peak_982	6	+	7.26e-07	5126	PCSK2	3'UTR
chr20	30782635	30782658	Peak_1002	7	-	4.08e-04	5326	PLAGL2	3'UTR
chr20	31437829	31437889	Peak_983	5	+	4.14e-03	22919	MAPRE1	3'UTR
chr20	34633814	34633829	Peak_1005	13	-	1.38e-04	647979	LOC647979	3'UTR
chr20	34844097	34844132	Peak_985	4	+	1.27e-02	25980	C20orf4	3'UTR
chr20	35626610	35626647	Peak_1006	4	-	4.53e-03	5933	RBL1	3'UTR
chr20	35869785	35869811	Peak_986	4	+	4.20e-03	6185	RPN2	3'UTR
chr20	37206343	37206401	Peak_987	7	+	1.82e-09	57148	RALGAPB	3'UTR
chr20	43706059	43706105	Peak_988	5	+	2.65e-04	6789	STK4	3'UTR
chr20	43707211	43707274	Peak_989	10	+	1.00e-100	6789	STK4	3'UTR
chr20	44512748	44512774	Peak_990	9	+	3.08e-07	90204	ZSWIM1	3'UTR
chr20	48698561	48698629	Peak_1009	5	-	1.25e-03	7335	UBE2V1	3'UTR
chr20	48698561	48698629	Peak_1011	5	-	6.42e-03	7335	UBE2V1	3'UTR
chr20	48699164	48699211	Peak_1010	5	-	1.25e-03	7335	UBE2V1	3'UTR
chr20	48699164	48699211	Peak_1012	5	-	6.42e-03	7335	UBE2V1	3'UTR
chr21	27253578	27253583	Peak_1022	7	-	9.95e-09	351	APP	3'UTR
chr21	27253807	27253849	Peak_1023	6	-	2.39e-06	351	APP	3'UTR
chr21	46190277	46190304	Peak_1027	6	-	7.94e-04	7327	UBE2G2	3'UTR
chr22	21242613	21242661	Peak_1029	8	+	1.00e-100	9342	SNAP29	3'UTR
chr22	21976285	21976318	Peak_1030	5	+	1.19e-04	7332	UBE2L3	3'UTR
chr22	36677637	36677665	Peak_1047	7	-	4.82e-07	4627	MYH9	3'UTR
chr22	36678117	36678155	Peak_1048	5	-	1.61e-02	4627	MYH9	3'UTR
chr22	36678262	36678306	Peak_1049	6	-	9.66e-05	4627	MYH9	3'UTR
chr22	38169952	38169994	Peak_1035	10	+	1.00e-100	11078	TRIOBP	3'UTR
chr22	39130867	39130892	Peak_1050	5	-	2.02e-04	25777	SUN2	3'UTR
chr22	41325203	41325251	Peak_1038	13	+	1.90e-09	63929	XPNPEP3	3'UTR
chr22	41575906	41575913	Peak_1039	19	+	1.00e-100	2033	EP300	3'UTR
chr22	43015575	43015611	Peak_1054	5	-	4.03e-04	1727	CYB5R3	3'UTR
chr3	10192589	10192672	Peak_1058	12	+	8.22e-10	7428	VHL	3'UTR
chr3	10194243	10194270	Peak_1059	21	+	4.13e-10	7428	VHL	3'UTR
chr3	32523733	32523790	Peak_1110	6	-	3.31e-03	54918	CMTM6	3'UTR
chr3	47628907	47628908	Peak_1113	7	-	3.98e-06	6599	SMARCC1	3'UTR
chr3	47629560	47629578	Peak_1114	8	-	2.02e-08	6599	SMARCC1	3'UTR
chr3	49396811	49396858	Peak_1119	6	-	5.02e-05	387	RHOA	3'UTR
chr3	49762623	49762634	Peak_1120	7	-	2.98e-08	9807	IP6K1	3'UTR
chr3	58279655	58279675	Peak_1072	8	+	1.06e-05	57406	ABHD6	3'UTR
chr3	78647003	78647034	Peak_1127	4	-	6.22e-04	6091	ROBO1	3'UTR
chr3	86992127	86992160	Peak_1128	5	-	4.58e-04	389136	VGLL3	3'UTR
chr3	89530414	89530425	Peak_1078	5	+	2.79e-06	2042	EPHA3	3'UTR
chr3	105293570	105293615	Peak_1080	5	+	1.00e-04	214	ALCAM	3'UTR
chr3	113528630	113528648	Peak_1081	4	+	2.27e-02	523	ATP6V1A	3'UTR
chr3	122606430	122606472	Peak_1082	7	+	1.67e-05	100129550	LOC100129550	3'UTR
chr3	128532438	128532453	Peak_1084	65	+	1.52e-09	7879	RAB7A	3'UTR
chr3	128532686	128532717	Peak_1085	6	+	5.30e-03	7879	RAB7A	3'UTR
chr3	133876156	133876189	Peak_1138	4	-	2.64e-02	6259	RYK	3'UTR
chr3	149237700	149237730	Peak_1142	5	-	2.99e-04	25937	WWTR1	3'UTR
chr3	156259484	156259505	Peak_1144	9	-	3.06e-04	6747	SSR3	3'UTR
chr3	158409925	158409959	Peak_1089	4	+	2.52e-02	85476	GFM1	3'UTR
chr3	188604504	188604561	Peak_1098	9	+	1.00e-100	4026	LPP	3'UTR
chr3	189675454	189675508	Peak_1152	12	-	2.84e-09	55214	LEPREL1	3'UTR
chr3	190367857	190367894	Peak_1100	5	+	9.63e-03	3556	IL1RAP	3'UTR
chr3	194126320	194126322	Peak_1153	5	-	1.41e-02	79572	ATP13A3	3'UTR
chr3	196461673	196461716	Peak_1101	4	+	4.16e-02	54965	PIGX	3'UTR
chr3	196556056	196556084	Peak_1102	6	+	1.94e-05	5062	PAK2	3'UTR
chr3	196661463	196661508	Peak_1103	4	+	4.07e-02	205564	SENP5	3'UTR
chr4	516398	516427	Peak_1155	4	+	4.25e-02	54872	PIGG	3'UTR
chr4	1019482	1019495	Peak_1156	16	+	2.70e-10	53834	FGFRL1	3'UTR
chr4	1019903	1019912	Peak_1157	25	+	2.70e-10	53834	FGFRL1	3'UTR
chr4	1981075	1981127	Peak_1159	5	+	2.03e-02	7468	WHSC1	3'UTR
chr4	15070928	15070944	Peak_1161	6	+	3.97e-06	132864	CPEB2	3'UTR
chr4	17803628	17803740	Peak_1196	11	-	1.73e-10	54876	DCAF16	3'UTR
chr4	22389065	22389107	Peak_1199	6	-	3.68e-07	166647	GPR125	3'UTR
chr4	25280335	25280384	Peak_1163	4	+	6.21e-04	55300	PI4K2B	3'UTR
chr4	31145515	31145550	Peak_1166	5	+	5.32e-03	5099	PCDH7	3'UTR
chr4	56236606	56236649	Peak_1170	12	+	1.00e-100	79644	SRD5A3	3'UTR
chr4	57326102	57326153	Peak_1172	7	+	1.43e-05	10606	PAICS	3'UTR
chr4	77082026	77082069	Peak_1205	5	-	4.36e-05	950	SCARB2	3'UTR
chr4	77956640	77956654	Peak_1174	5	+	1.24e-02	55752	SEPT11	3'UTR
chr4	88997022	88997095	Peak_1175	8	+	1.20e-09	5311	PKD2	3'UTR
chr4	95588207	95588275	Peak_1176	6	+	3.33e-08	10611	PDLIM5	3'UTR
chr4	99801961	99801997	Peak_1206	15	-	1.00e-100	1977	EIF4E	3'UTR
chr4	99983769	99983835	Peak_1177	4	+	1.41e-02	23173	METAP1	3'UTR
chr4	103717788	103717818	Peak_1207	7	-	1.18e-06	7323	UBE2D3	3'UTR
chr4	110970827	110970840	Peak_1211	9	-	1.00e-100	79071	ELOVL6	3'UTR
chr4	139091417	139091478	Peak_1215	6	-	4.52e-05	23657	SLC7A11	3'UTR
chr4	140395068	140395141	Peak_1181	5	+	9.22e-04	83452	RAB33B	3'UTR
chr4	170641543	170641620	Peak_1186	5	+	6.19e-06	1182	CLCN3	3'UTR
chr4	177252205	177252226	Peak_1188	13	+	1.00e-100	60559	SPCS3	3'UTR
chr4	186082040	186082110	Peak_1220	4	-	2.00e-02	57587	KIAA1430	3'UTR
chr5	918018	918042	Peak_1222	4	+	1.66e-02	9319	TRIP13	3'UTR
chr5	1462782	1462810	Peak_1258	7	-	5.79e-05	79888	LPCAT1	3'UTR
chr5	17276096	17276105	Peak_1223	99	+	1.00e-100	10409	BASP1	3'UTR
chr5	32228711	32228770	Peak_1259	5	-	3.08e-04	54545	MTMR12	3'UTR
chr5	36035265	36035299	Peak_1260	20	-	1.00e-100	167127	UGT3A2	3'UTR
chr5	36035403	36035419	Peak_1261	16	-	1.00e-100	167127	UGT3A2	3'UTR
chr5	36035647	36035694	Peak_1262	8	-	2.41e-04	167127	UGT3A2	3'UTR
chr5	38480881	38480920	Peak_1264	5	-	2.09e-04	3977	LIFR	3'UTR
chr5	41918484	41918516	Peak_1225	5	+	7.43e-03	285636	C5orf51	3'UTR
chr5	67597234	67597305	Peak_1229	6	+	5.60e-08	5295	PIK3R1	3'UTR
chr5	69337757	69337828	Peak_1231	5	+	1.53e-08	8293	SERF1A	3'UTR
chr5	69337757	69337828	Peak_1232	5	+	1.00e-100	728492	SERF1B	3'UTR
chr5	71503592	71503614	Peak_1234	6	+	8.13e-04	4131	MAP1B	3'UTR
chr5	71505107	71505146	Peak_1235	6	+	8.13e-04	4131	MAP1B	3'UTR
chr5	74667943	74668003	Peak_1268	3	-	2.75e-02	10087	COL4A3BP	3'UTR
chr5	82349822	82349865	Peak_1270	5	-	1.37e-02	153339	TMEM167A	3'UTR
chr5	106714633	106714702	Peak_1276	4	-	7.72e-03	1946	EFNA5	3'UTR
chr5	109202865	109202931	Peak_1237	10	+	3.05e-09	4124	MAN2A1	3'UTR
chr5	111066258	111066285	Peak_1277	3	-	5.53e-03	9315	NREP	3'UTR
chr5	112213699	112213701	Peak_1278	25	-	7.87e-10	7905	REEP5	3'UTR
chr5	114858636	114858700	Peak_1279	4	-	7.91e-03	56929	FEM1C	3'UTR
chr5	130540207	130540220	Peak_1239	21	+	1.00e-100	90624	LYRM7	3'UTR
chr5	133292110	133292152	Peak_1281	7	-	5.96e-06	56951	C5orf15	3'UTR
chr5	134670474	134670550	Peak_1282	4	-	4.32e-02	9555	H2AFY	3'UTR
chr5	135514180	135514183	Peak_1240	5	+	2.69e-03	4090	SMAD5	3'UTR
chr5	137843515	137843549	Peak_1285	7	-	1.42e-07	2107	ETF1	3'UTR
chr5	140891434	140891466	Peak_1244	4	+	4.83e-02	56100	PCDHGB6	3'UTR
chr5	140891434	140891466	Peak_1245	4	+	4.99e-02	56106	PCDHGA10	3'UTR
chr5	141691472	141691521	Peak_1288	5	-	1.43e-02	81848	SPRY4	3'UTR
chr5	150036986	150037017	Peak_1247	9	+	1.00e-100	11346	SYNPO	3'UTR
chr5	151041847	151041870	Peak_1289	11	-	3.46e-08	6678	SPARC	3'UTR
chr5	151042699	151042733	Peak_1290	28	-	4.44e-10	6678	SPARC	3'UTR
chr5	154194016	154194040	Peak_1248	11	+	1.00e-100	23367	LARP1	3'UTR
chr5	158584569	158584600	Peak_1292	6	-	5.68e-08	153830	RNF145	3'UTR
chr5	158712220	158712247	Peak_1249	11	+	1.00e-100	134510	UBLCP1	3'UTR
chr5	172378635	172378678	Peak_1255	4	+	4.11e-02	57222	ERGIC1	3'UTR
chr5	172379265	172379305	Peak_1256	4	+	4.11e-02	57222	ERGIC1	3'UTR
chr5	175773186	175773205	Peak_1294	5	-	1.72e-02	57179	KIAA1191	3'UTR
chr5	179041770	179041790	Peak_1297	13	-	5.39e-10	3187	HNRNPH1	3'UTR
chr5	179157015	179157040	Peak_1257	10	+	1.03e-07	821	CANX	3'UTR
chr6	7286677	7286690	Peak_1335	7	-	5.86e-04	6745	SSR1	3'UTR
chr6	7882484	7882532	Peak_1336	5	-	1.51e-05	100526836	MUTED-TXNDC5	3'UTR
chr6	7882484	7882532	Peak_1337	5	-	9.11e-03	81567	TXNDC5	3'UTR
chr6	34213571	34213574	Peak_1309	41	+	1e-100	3159	HMGA1	3'UTR
chr6	34555612	34555670	Peak_1342	4	-	4.24e-04	64771	C6orf106	3'UTR
chr6	35800852	35800887	Peak_1343	6	-	6.60e-05	6732	SRPK1	3'UTR
chr6	38644010	38644022	Peak_1345	7	-	5.43e-06	2739	GLO1	3'UTR
chr6	53132780	53132794	Peak_1351	8	-	1.00e-100	60481	ELOVL5	3'UTR
chr6	64290711	64290746	Peak_1314	4	+	3.73e-02	7803	PTP4A1	3'UTR
chr6	73907327	73907335	Peak_1315	23	+	1.00e-100	56479	KCNQ5	3'UTR
chr6	75962798	75962864	Peak_1352	5	-	1.04e-03	55754	TMEM30A	3'UTR
chr6	75963782	75963813	Peak_1353	6	-	4.56e-06	55754	TMEM30A	3'UTR
chr6	89872144	89872169	Peak_1317	4	+	3.56e-02	135293	PM20D2	3'UTR
chr6	122764820	122764823	Peak_1362	6	-	5.20e-05	57515	SERINC1	3'UTR
chr6	131161433	131161485	Peak_1365	12	-	3.84e-09	2037	EPB41L2	3'UTR
chr6	133137968	133137994	Peak_1326	11	+	1.86e-05	594838	SNORD100	3'UTR
chr6	133137968	133137994	Peak_1328	11	+	6.61e-04	594838	SNORD100	3'UTR
chr6	133138424	133138435	Peak_1327	9	+	7.50e-03	594839	SNORA33	3'UTR
chr6	157529976	157530025	Peak_1331	10	+	1.48e-08	57492	ARID1B	3'UTR
chr6	158932424	158932454	Peak_1333	4	+	3.83e-02	56995	TULP4	3'UTR
chr7	5566898	5566903	Peak_1414	20	-	1.00e-100	60	ACTB	3'UTR
chr7	5645224	5645227	Peak_1371	7	+	7.14e-03	6624	FSCN1	3'UTR
chr7	21941145	21941194	Peak_1415	5	-	1.66e-04	55536	CDCA7L	3'UTR
chr7	22982573	22982607	Peak_1416	4	-	2.66e-03	84668	FAM126A	3'UTR
chr7	26251855	26251922	Peak_1373	7	+	1.43e-04	11335	CBX3	3'UTR
chr7	30673518	30673566	Peak_1374	5	+	4.50e-04	2617	GARS	3'UTR
chr7	35944039	35944101	Peak_1375	9	+	1.82e-09	989	SEPT7	3'UTR
chr7	36493077	36493098	Peak_1376	5	+	1.29e-03	54443	ANLN	3'UTR
chr7	72950866	72950900	Peak_1422	4	-	2.71e-02	9275	BCL7B	3'UTR
chr7	87827504	87827555	Peak_1386	4	+	4.61e-04	53616	ADAM22	3'UTR
chr7	97837701	97837765	Peak_1388	4	+	5.79e-03	22853	LMTK2	3'UTR
chr7	100278924	100278995	Peak_1425	6	-	2.74e-03	64599	GIGYF1	3'UTR
chr7	116147077	116147137	Peak_1393	6	+	1.13e-08	857	CAV1	3'UTR
chr7	116147077	116147137	Peak_1395	6	+	5.17e-03	857	CAV1	3'UTR
chr7	116148547	116148569	Peak_1394	4	+	6.41e-03	858	CAV2	3'UTR
chr7	116199410	116199448	Peak_1396	7	+	4.32e-05	857	CAV1	3'UTR
chr7	116199660	116199672	Peak_1397	8	+	3.11e-07	857	CAV1	3'UTR
chr7	116199971	116199997	Peak_1398	12	+	4.65e-09	857	CAV1	3'UTR
chr7	116200146	116200152	Peak_1399	10	+	4.65e-09	857	CAV1	3'UTR
chr7	116200406	116200411	Peak_1400	12	+	4.65e-09	857	CAV1	3'UTR
chr7	116200591	116200617	Peak_1401	8	+	3.11e-07	857	CAV1	3'UTR
chr7	116200724	116200726	Peak_1402	16	+	4.65e-09	857	CAV1	3'UTR
chr7	116200845	116200850	Peak_1403	39	+	4.65e-09	857	CAV1	3'UTR
chr7	128032655	128032682	Peak_1432	5	-	5.00e-02	3614	IMPDH1	3'UTR
chr7	134653739	134653778	Peak_1408	5	+	1.28e-06	800	CALD1	3'UTR
chr7	137561079	137561103	Peak_1440	37	-	2.18e-09	64764	CREB3L2	3'UTR
chr7	137563418	137563467	Peak_1441	5	-	3.44e-02	64764	CREB3L2	3'UTR
chr7	137563661	137563719	Peak_1442	13	-	2.18e-09	64764	CREB3L2	3'UTR
chr7	138710646	138710717	Peak_1443	8	-	1.37e-07	92092	ZC3HAV1L	3'UTR
chr7	148113741	148113766	Peak_1409	3	+	3.05e-02	26047	CNTNAP2	3'UTR
chr7	148117514	148117580	Peak_1410	3	+	3.05e-02	26047	CNTNAP2	3'UTR
chr7	156475959	156476023	Peak_1445	4	-	1.49e-02	64327	LMBR1	3'UTR
chr8	11181005	11181066	Peak_1448	4	+	1.32e-03	66036	MTMR9	3'UTR
chr8	12881563	12881636	Peak_1449	5	+	2.80e-02	57604	KIAA1456	3'UTR
chr8	17087095	17087152	Peak_1484	6	-	2.36e-04	29883	CNOT7	3'UTR
chr8	18388181	18388232	Peak_1485	4	-	1.71e-03	23362	PSD3	3'UTR
chr8	21863876	21863944	Peak_1452	4	+	4.29e-03	23039	XPO7	3'UTR
chr8	26228383	26228406	Peak_1454	5	+	6.85e-08	5520	PPP2R2A	3'UTR
chr8	26514069	26514071	Peak_1455	6	+	2.87e-04	1808	DPYSL2	3'UTR
chr8	26515033	26515058	Peak_1456	5	+	4.19e-02	1808	DPYSL2	3'UTR
chr8	26515561	26515608	Peak_1457	6	+	2.87e-04	1808	DPYSL2	3'UTR
chr8	27529262	27529327	Peak_1458	7	+	9.50e-09	51435	SCARA3	3'UTR
chr8	27661045	27661095	Peak_1459	6	+	3.23e-06	157570	ESCO2	3'UTR
chr8	27667288	27667352	Peak_1488	4	-	1.16e-02	55872	PBK	3'UTR
chr8	28205667	28205740	Peak_1489	4	-	9.28e-03	55893	ZNF395	3'UTR
chr8	28908896	28908936	Peak_1460	4	+	1.47e-03	79618	HMBOX1	3'UTR
chr8	42876817	42876853	Peak_1465	6	+	8.33e-06	84376	HOOK3	3'UTR
chr8	43055336	43055342	Peak_1466	5	+	4.70e-04	138050	HGSNAT	3'UTR
chr8	56981045	56981107	Peak_1494	8	-	4.06e-03	6224	RPS20	3'UTR
chr8	57873538	57873561	Peak_1495	6	-	4.79e-03	54928	IMPAD1	3'UTR
chr8	59495059	59495072	Peak_1470	5	+	1.39e-03	6386	SDCBP	3'UTR
chr8	61533379	61533440	Peak_1472	4	+	4.57e-02	5862	RAB2A	3'UTR
chr8	64123646	64123713	Peak_1473	4	+	4.91e-02	253943	YTHDF3	3'UTR
chr8	81548300	81548302	Peak_1498	5	-	6.40e-03	619279	ZNF704	3'UTR
chr8	81551808	81551817	Peak_1499	5	-	6.40e-03	619279	ZNF704	3'UTR
chr8	97156487	97156511	Peak_1500	27	-	1.00e-100	392255	GDF6	3'UTR
chr8	98737086	98737109	Peak_1476	5	+	2.00e-02	92140	MTDH	3'UTR
chr8	98737695	98737707	Peak_1477	8	+	4.42e-09	92140	MTDH	3'UTR
chr8	101715497	101715499	Peak_1503	33	-	3.28e-10	26986	PABPC1	3'UTR
chr8	101931651	101931685	Peak_1505	9	-	1.32e-07	7534	YWHAZ	3'UTR
chr8	101932168	101932222	Peak_1506	8	-	1.04e-05	7534	YWHAZ	3'UTR
chr8	107763560	107763570	Peak_1479	3	+	4.45e-02	55074	OXR1	3'UTR
chr8	141526689	141526693	Peak_1480	6	+	3.02e-03	54108	CHRAC1	3'UTR
chr8	144103301	144103364	Peak_1481	7	+	1.03e-03	4061	LY6E	3'UTR
chr9	14083390	14083418	Peak_1558	6	-	5.43e-09	4781	NFIB	3'UTR
chr9	34634805	34634813	Peak_1562	108	-	1.00e-100	10280	SIGMAR1	3'UTR
chr9	35057027	35057047	Peak_1563	6	-	1.94e-04	7415	VCP	3'UTR
chr9	36215266	36215315	Peak_1565	6	-	2.36e-08	10020	GNE	3'UTR
chr9	94973005	94973035	Peak_1570	6	-	2.29e-05	3376	IARS	3'UTR
chr9	97222156	97222206	Peak_1539	4	+	1.89e-02	84641	HIATL1	3'UTR
chr9	99150206	99150239	Peak_1573	5	-	3.61e-04	195828	ZNF367	3'UTR
chr9	108403229	108403259	Peak_1541	4	+	1.93e-04	2218	FKTN	3'UTR
chr9	112931836	112931856	Peak_1543	4	+	2.79e-03	11217	AKAP2	3'UTR
chr9	112931836	112931856	Peak_1544	4	+	6.44e-03	445815	PALM2-AKAP2	3'UTR
chr9	114982907	114982968	Peak_1577	4	-	2.24e-02	9991	PTBP3	3'UTR
chr9	116022876	116022894	Peak_1547	17	+	7.78e-10	1317	SLC31A1	3'UTR
chr9	125887643	125887697	Peak_1579	4	-	3.77e-02	55342	STRBP	3'UTR
chr9	130552367	130552429	Peak_1548	5	+	3.89e-02	1025	CDK9	3'UTR
chr9	131395644	131395666	Peak_1549	4	+	3.07e-02	6709	SPTAN1	3'UTR
chr9	131457026	131457082	Peak_1551	32	+	1.00e-100	6418	SET	3'UTR
chr9	134108997	134109055	Peak_1553	4	+	3.40e-03	8021	NUP214	3'UTR
chr9	139099179	139099238	Peak_1587	8	-	6.76e-10	169714	QSOX2	3'UTR
chrX	10415401	10415423	Peak_1616	3	-	1.32e-02	4281	MID1	3'UTR
chrX	22012603	22012681	Peak_1590	4	+	6.43e-03	6611	SMS	3'UTR
chrX	24095047	24095094	Peak_1591	6	+	9.19e-04	1968	EIF2S3	3'UTR
chrX	37987886	37987944	Peak_1594	4	+	5.66e-04	94122	SYTL5	3'UTR
chrX	47306466	47306525	Peak_1621	4	-	3.42e-02	7592	ZNF41	3'UTR
chrX	49862213	49862245	Peak_1598	7	+	3.03e-09	1184	CLCN5	3'UTR
chrX	54591197	54591263	Peak_1599	7	+	1.68e-04	54552	GNL3L	3'UTR
chrX	64960097	64960133	Peak_1601	8	+	1.64e-07	4478	MSN	3'UTR
chrX	64960939	64960978	Peak_1602	6	+	2.30e-03	4478	MSN	3'UTR
chrX	68061187	68061231	Peak_1603	6	+	3.46e-03	1947	EFNB1	3'UTR
chrX	71380169	71380223	Peak_1604	4	+	2.00e-02	392490	FLJ44635	3'UTR
chrX	77082015	77082030	Peak_1628	4	-	3.67e-02	84061	MAGT1	3'UTR
chrX	77084013	77084040	Peak_1629	5	-	1.10e-04	84061	MAGT1	3'UTR
chrX	77381478	77381513	Peak_1606	5	+	3.51e-02	5230	PGK1	3'UTR
chrX	79931837	79931867	Peak_1630	24	-	2.40e-09	254065	BRWD3	3'UTR
chrX	118377873	118377874	Peak_1610	16	+	1.40e-10	10857	PGRMC1	3'UTR
chrX	118751072	118751084	Peak_1632	15	-	1.00e-100	23157	SEPT6	3'UTR
chrX	123235767	123235770	Peak_1611	6	+	2.43e-08	10735	STAG2	3'UTR
chrX	123510644	123510653	Peak_1633	5	-	2.63e-06	10178	ODZ1	3'UTR
chrX	153760066	153760114	Peak_1638	5	-	5.70e-03	2539	G6PD	3'UTR
chr1	61548367	61548399	Peak_28	11	+	1.00e-100	4774	NFIA	5'UTR
chr1	116916721	116916722	Peak_47	13	+	1.00e-100	476	ATP1A1	5'UTR
chr1	224621918	224621953	Peak_170	5	-	1.88e-04	80232	WDR26	5'UTR
chr10	52193264	52193312	Peak_215	4	-	8.68e-05	259230	SGMS1	5'UTR
chr11	10830312	10830322	Peak_305	8	-	4.64e-02	1982	EIF4G2	5'UTR
chr11	14379824	14379879	Peak_306	4	-	3.33e-02	22800	RRAS2	5'UTR
chr11	61735029	61735058	Peak_323	14	-	1.00e-100	2495	FTH1	5'UTR
chr12	66218521	66218527	Peak_371	11	+	2.44e-09	8091	HMGA2	5'UTR
chr14	20786560	20786644	Peak_498	10	-	1.00e-100	57820	CCNB1IP1	5'UTR
chr15	99192768	99192800	Peak_556	7	+	5.39e-09	3480	IGF1R	5'UTR
chr16	18937497	18937501	Peak_643	5	-	1.41e-03	23049	SMG1	5'UTR
chr16	29606595	29606653	Peak_646	5	-	9.90e-07	440354	LOC440354	5'UTR
chr16	29606595	29606653	Peak_647	5	-	1.51e-06	440354	LOC440354	5'UTR
chr16	29606595	29606653	Peak_648	5	-	1.59e-06	440354	LOC440354	5'UTR
chr16	29606595	29606653	Peak_649	5	-	1.59e-06	440354	LOC440354	5'UTR
chr16	29606595	29606653	Peak_650	5	-	1.59e-06	440354	LOC440354	5'UTR
chr16	75272812	75272849	Peak_668	6	-	1.75e-02	9564	BCAR1	5'UTR
chr17	27807141	27807212	Peak_688	5	+	4.39e-02	57551	TAOK1	5'UTR
chr2	23608495	23608526	Peak_851	5	+	2.93e-03	114818	KLHL29	5'UTR
chr3	58223505	58223551	Peak_1070	8	+	1.06e-05	57406	ABHD6	5'UTR
chr5	65222388	65222477	Peak_1228	5	+	1.71e-05	55914	ERBB2IP	5'UTR
chr5	157217312	157217385	Peak_1291	4	-	4.43e-03	9685	CLINT1	5'UTR
chr7	5461068	5461118	Peak_1413	5	-	2.62e-02	84629	TNRC18	5'UTR
chr8	101734194	101734224	Peak_1504	13	-	1.34e-08	26986	PABPC1	5'UTR
chr9	139940531	139940550	Peak_1589	9	-	2.69e-03	56654	NPDC1	5'UTR
chrX	40945299	40945324	Peak_1595	4	+	3.57e-03	8239	USP9X	5'UTR
chr2	220084194	220084230	Peak_971	5	-	2.93e-02	79065	ATG9A	5'UTR||3'UTR
chr7	135612412	135612445	Peak_1438	5	-	8.04e-03	767558	LUZP6	5'UTR||3'UTR
chr7	135612412	135612445	Peak_1439	5	-	8.04e-03	136319	MTPN	5'UTR||3'UTR
chr1	46073034	46073048	Peak_21	6	+	3.44e-03	4678	NASP	CDS
chr1	46499539	46499582	Peak_22	4	+	8.00e-03	23139	MAST2	CDS
chr1	46527653	46527658	Peak_107	5	-	3.21e-06	8503	PIK3R3	CDS
chr1	49201866	49201939	Peak_110	4	-	3.06e-07	79656	BEND5	CDS
chr1	49201866	49201939	Peak_111	4	-	9.34e-04	84871	AGBL4	CDS
chr1	52299696	52299722	Peak_115	6	-	3.73e-02	4898	NRD1	CDS
chr1	93720090	93720171	Peak_40	4	+	9.43e-03	343099	CCDC18	CDS
chr1	149783788	149783821	Peak_148	6	-	1.00e-100	440689	HIST2H2BF	CDS
chr1	156737713	156737754	Peak_60	4	+	4.69e-02	5546	PRCC	CDS
chr1	184663227	184663316	Peak_163	4	-	4.55e-02	80267	EDEM3	CDS
chr1	186324605	186324666	Peak_164	4	-	2.29e-04	100302192	MIR548F1	CDS
chr1	197053508	197053571	Peak_165	9	-	1.00e-100	259266	ASPM	CDS
chr1	204515928	204515989	Peak_89	4	+	1.18e-02	4194	MDM4	CDS
chr1	213168386	213168412	Peak_167	4	-	8.25e-03	90806	ANGEL2	CDS
chr1	235345827	235345855	Peak_177	4	-	5.89e-03	51742	ARID4B	CDS
chr10	8007611	8007684	Peak_182	4	+	5.98e-03	83860	TAF3	CDS
chr10	24809108	24809140	Peak_186	4	+	1.16e-02	56243	KIAA1217	CDS
chr10	64966789	64966843	Peak_216	4	-	4.99e-02	221037	JMJD1C	CDS
chr10	99024625	99024659	Peak_228	6	-	1.20e-06	84986	ARHGAP19	CDS
chr10	99024625	99024659	Peak_230	6	-	3.60e-05	84986	ARHGAP19	CDS
chr11	812761	812794	Peak_240	9	+	3.25e-04	6181	RPLP2	CDS
chr11	32956882	32956902	Peak_255	9	+	1.71e-08	79832	QSER1	CDS
chr11	36522739	36522802	Peak_311	4	-	1.42e-02	7189	TRAF6	CDS
chr11	102988361	102988424	Peak_297	5	+	2.79e-07	79659	DYNC2H1	CDS
chr12	6673356	6673442	Peak_398	8	-	1.35e-08	4839	NOP2	CDS
chr12	6858015	6858064	Peak_400	6	-	8.99e-05	8079	MLF2	CDS
chr12	104341159	104341201	Peak_384	10	+	2.24e-08	7184	HSP90B1	CDS
chr13	49705368	49705386	Peak_442	4	+	3.09e-02	22862	FNDC3A	CDS
chr13	111935694	111935764	Peak_451	4	+	2.56e-04	8874	ARHGEF7	CDS
chr14	56079080	56079127	Peak_478	7	+	5.54e-08	3895	KTN1	CDS
chr14	64610498	64610530	Peak_480	4	+	1.08e-03	23224	SYNE2	CDS
chr14	102549428	102549462	Peak_522	8	-	1.08e-07	3320	HSP90AA1	CDS
chr14	102551146	102551155	Peak_523	18	-	1.00e-100	3320	HSP90AA1	CDS
chr15	56385921	56386000	Peak_565	4	-	5.72e-03	64864	RFX7	CDS
chr15	68438208	68438245	Peak_547	5	+	3.66e-04	8554	PIAS1	CDS
chr16	1574855	1574903	Peak_634	4	-	4.08e-03	9742	IFT140	CDS
chr16	15126759	15126837	Peak_592	4	+	1.01e-02	23042	PDXDC1	CDS
chr17	35345817	35345867	Peak_693	4	+	9.71e-03	26574	AATF	CDS
chr17	48823210	48823261	Peak_701	5	+	2.23e-02	51747	LUC7L3	CDS
chr19	13054689	13054715	Peak_789	12	+	7.62e-03	811	CALR	CDS
chr2	71591085	71591174	Peak_872	4	+	4.19e-02	27332	ZNF638	CDS
chr2	99992936	99992965	Peak_878	6	+	2.70e-05	9669	EIF5B	CDS
chr2	162226656	162226689	Peak_890	4	+	3.22e-02	10213	PSMD14	CDS
chr2	162227680	162227725	Peak_891	4	+	3.22e-02	10213	PSMD14	CDS
chr2	171822406	171822441	Peak_894	5	+	2.37e-05	26003	GORASP2	CDS
chr2	190339942	190340014	Peak_898	4	+	6.73e-03	84128	WDR75	CDS
chr2	216200770	216200833	Peak_901	4	+	2.03e-03	471	ATIC	CDS
chr2	232325241	232325263	Peak_973	15	-	1.33e-09	4691	NCL	CDS
chr20	3765787	3765833	Peak_997	9	-	7.39e-04	1059	CENPB	CDS
chr20	34242373	34242432	Peak_1003	5	-	1.17e-02	10137	RBM12	CDS
chr20	44980736	44980801	Peak_1008	4	-	3.27e-02	51006	SLC35C2	CDS
chr20	60711929	60711954	Peak_1014	6	-	2.75e-02	5688	PSMA7	CDS
chr21	34042651	34042679	Peak_1024	4	-	6.41e-03	8867	SYNJ1	CDS
chr22	41650375	41650405	Peak_1053	5	-	1.33e-03	5905	RANGAP1	CDS
chr3	37366080	37366135	Peak_1061	5	+	5.00e-04	2803	GOLGA4	CDS
chr3	47677585	47677587	Peak_1115	6	-	6.41e-04	6599	SMARCC1	CDS
chr4	57796676	57796741	Peak_1173	4	+	4.65e-02	5978	REST	CDS
chr4	165118127	165118201	Peak_1217	4	-	3.22e-02	55016	MARCH1	CDS
chr5	70763215	70763236	Peak_1233	8	+	8.30e-07	55814	BDP1	CDS
chr5	87492303	87492373	Peak_1271	4	-	1.07e-02	153396	TMEM161B	CDS
chr5	139903778	139903825	Peak_1243	4	+	4.39e-02	404734	ANKHD1-EIF4EBP3	CDS
chr6	4892337	4892405	Peak_1299	4	+	1.47e-02	9425	CDYL	CDS
chr6	80750366	80750396	Peak_1316	8	+	1.00e-100	7272	TTK	CDS
chr6	145069568	145069610	Peak_1329	5	+	4.64e-06	7402	UTRN	CDS
chr7	158581074	158581107	Peak_1446	4	-	1.27e-02	57488	ESYT2	CDS
chr8	99057576	99057592	Peak_1502	7	-	6.82e-06	6156	RPL30	CDS
chr8	124382099	124382120	Peak_1510	8	-	3.30e-09	29028	ATAD2	CDS
chr9	88648245	88648274	Peak_1568	4	-	1.67e-03	51280	GOLM1	CDS
chr9	114180228	114180274	Peak_1574	4	-	1.47e-02	23392	KIAA0368	CDS
chr9	131456255	131456269	Peak_1550	10	+	9.27e-05	6418	SET	CDS
chrX	19028796	19028843	Peak_1619	4	-	9.16e-03	10149	GPR64	CDS
chrX	53430519	53430578	Peak_1622	5	-	1.42e-02	8243	SMC1A	CDS
chrX	53574704	53574733	Peak_1623	5	-	2.06e-04	10075	HUWE1	CDS
chrX	154743790	154743829	Peak_1639	5	-	2.92e-06	55217	TMLHE	CDS
chr12	125263068	125263097	Peak_436	6	-	3.11e-04	949	SCARB1	CDS||3'UTR
chr13	38211011	38211049	Peak_464	4	-	7.05e-04	7223	TRPC4	CDS||3'UTR
chr16	28493434	28493456	Peak_645	5	-	2.63e-04	1201	CLN3	CDS||3'UTR
chr16	29821547	29821556	Peak_599	8	+	1.00e-100	4150	MAZ	CDS||3'UTR
chr16	29821547	29821556	Peak_601	8	+	1.00e-100	4150	MAZ	CDS||3'UTR
chr16	29821547	29821556	Peak_603	8	+	1.00e-100	4150	MAZ	CDS||3'UTR
chr16	29821547	29821556	Peak_605	8	+	1.00e-100	4150	MAZ	CDS||3'UTR
chr16	29821547	29821556	Peak_607	8	+	1.00e-100	4150	MAZ	CDS||3'UTR
chr16	29821547	29821556	Peak_609	8	+	1.00e-100	4150	MAZ	CDS||3'UTR
chr16	29821547	29821556	Peak_611	8	+	1.00e-100	4150	MAZ	CDS||3'UTR
chr16	29821547	29821556	Peak_613	8	+	4.22e-02	4150	MAZ	CDS||3'UTR
chr2	145146436	145146466	Peak_941	8	-	1.00e-100	9839	ZEB2	CDS||3'UTR
chr1	52305957	52305966	Peak_116	17	-	3.07e-09	4898	NRD1	CDS||5'UTR
chr12	76449878	76449879	Peak_419	13	-	6.87e-10	4673	NAP1L1	CDS||5'UTR
chr2	136528156	136528220	Peak_888	6	+	2.70e-06	23190	UBXN4	CDS||5'UTR
chr3	158519771	158519833	Peak_1090	4	+	5.09e-03	64747	MFSD1	CDS||5'UTR
chr5	172324007	172324070	Peak_1254	4	+	4.11e-02	57222	ERGIC1	CDS||5'UTR
chr6	44218142	44218143	Peak_1312	16	+	1.16e-10	3326	HSP90AB1	CDS||5'UTR
chr8	22471753	22471785	Peak_1453	5	+	1.05e-02	57805	KIAA1967	CDS||5'UTR
chr1	145263762	145263793	Peak_147	3	-	5.95e-03			deep_intergenic
chr10	51741352	51741423	Peak_190	3	+	1.01e-02			downstream_10k||upstream_10k
chr1	14148899	14148964	Peak_2	5	+	1.45e-04	7799	PRDM2	exon_unclassified
chr1	25891054	25891119	Peak_4	5	+	5.19e-05	26119	LDLRAP1	exon_unclassified
chr1	40033105	40033168	Peak_104	6	-	5.88e-04	8761	PABPC4	exon_unclassified
chr1	45244081	45244117	Peak_20	18	+	1.00e-100	6202	RPS8	exon_unclassified
chr1	76252779	76252805	Peak_34	9	+	8.25e-05	5876	RABGGTB	exon_unclassified
chr1	155889737	155889775	Peak_154	6	-	4.46e-03	22889	KIAA0907	exon_unclassified
chr1	155895790	155895816	Peak_155	11	-	1.00e-100	677771	SCARNA4	exon_unclassified
chr1	173833542	173833566	Peak_159	11	-	2.42e-06	26802	SNORD47	exon_unclassified
chr1	193058945	193059003	Peak_83	6	+	2.74e-02	6738	TROVE2	exon_unclassified
chr11	8706998	8707050	Peak_243	14	+	1.00e-100	677826	SNORA45	exon_unclassified
chr11	10823032	10823063	Peak_304	13	-	2.25e-09	692223	SNORD97	exon_unclassified
chr11	62622493	62622551	Peak_325	13	-	2.09e-02	23642	SNHG1	exon_unclassified
chr11	62622782	62622792	Peak_326	26	-	1.00e-100	9302	SNORD26	exon_unclassified
chr11	65192455	65192471	Peak_280	6	+	7.94e-03	283131	NEAT1	exon_unclassified
chr11	65267181	65267188	Peak_281	84	+	4.48e-10	378938	MALAT1	exon_unclassified
chr11	65268051	65268055	Peak_282	27	+	5.96e-10	378938	MALAT1	exon_unclassified
chr11	75115501	75115530	Peak_292	6	+	1.03e-04	6188	RPS3	exon_unclassified
chr11	93463679	93463742	Peak_339	10	-	3.04e-05	684959	SNORA25	exon_unclassified
chr11	93465596	93465597	Peak_340	13	-	1.34e-09	79101	TAF1D	exon_unclassified
chr11	93465596	93465597	Peak_342	13	-	4.44e-04	654320	SNORA8	exon_unclassified
chr11	93468331	93468393	Peak_341	11	-	9.54e-07	677822	SNORA40	exon_unclassified
chr12	6619455	6619456	Peak_360	5	+	8.20e-04	692148	SCARNA10	exon_unclassified
chr12	7076604	7076614	Peak_401	21	-	1.00e-100	677777	SCARNA12	exon_unclassified
chr12	117289549	117289605	Peak_391	5	+	2.30e-06	84900	RNFT2	exon_unclassified
chr13	19837106	19837180	Peak_453	4	-	3.17e-03	100101938	ANKRD26P3	exon_unclassified
chr14	20791409	20791471	Peak_499	8	-	6.77e-07	57820	CCNB1IP1	exon_unclassified
chr14	95999746	95999750	Peak_519	11	-	6.82e-05	283596	SNHG10	exon_unclassified
chr15	25360702	25360765	Peak_525	9	+	1.00e-100	3653	IPW	exon_unclassified
chr15	25360702	25360765	Peak_526	9	+	1.00e-100	3653	IPW	exon_unclassified
chr15	25360702	25360765	Peak_527	9	+	1.98e-09	3653	IPW	exon_unclassified
chr15	65828041	65828110	Peak_542	10	+	1.00e-100	51495	PTPLAD1	exon_unclassified
chr15	66794359	66794425	Peak_575	5	-	8.81e-03	6124	RPL4	exon_unclassified
chr19	17973457	17973528	Peak_797	10	+	3.43e-06	26780	SNORA68	exon_unclassified
chr19	49994461	49994513	Peak_811	10	+	8.48e-05	26816	SNORD35A	exon_unclassified
chr19	49994461	49994513	Peak_812	10	+	2.08e-04	26816	SNORD35A	exon_unclassified
chr2	29136551	29136589	Peak_860	5	+	3.34e-03	692209	SNORD92	exon_unclassified
chr2	86247612	86247686	Peak_926	11	-	1.66e-09	90784	LOC90784	exon_unclassified
chr2	133014529	133014595	Peak_936	25	-	1.89e-09	100313824	MIR663B	exon_unclassified
chr2	133015225	133015226	Peak_937	340	-	1.89e-09	554226	ANKRD30BL	exon_unclassified
chr2	234184532	234184569	Peak_904	5	+	6.64e-04	55054	ATG16L1	exon_unclassified
chr20	17943408	17943436	Peak_999	8	-	6.10e-07	27131	SNX5	exon_unclassified
chr20	47897228	47897254	Peak_991	7	+	3.44e-03	692057	SNORD12	exon_unclassified
chr3	39449965	39450007	Peak_1062	14	+	4.45e-09	574040	SNORA6	exon_unclassified
chr3	39452633	39452636	Peak_1063	13	+	1.15e-07	6044	SNORA62	exon_unclassified
chr3	124494100	124494130	Peak_1132	4	-	8.56e-03	3693	ITGB5	exon_unclassified
chr3	160232817	160232843	Peak_1145	7	-	4.59e-08	3840	KPNA4	exon_unclassified
chr3	186504558	186504562	Peak_1096	42	+	2.17e-10	100302143	MIR1248	exon_unclassified
chr3	186505136	186505157	Peak_1097	14	+	2.44e-05	1974	EIF4A2	exon_unclassified
chr4	1976415	1976435	Peak_1158	5	+	2.03e-02	7468	WHSC1	exon_unclassified
chr4	53579412	53579478	Peak_1169	9	+	6.76e-04	57291	DANCR	exon_unclassified
chr4	119200383	119200401	Peak_1179	18	+	1.74e-08	677809	SNORA24	exon_unclassified
chr6	8086640	8086720	Peak_1338	4	-	1.26e-02	9521	EEF1E1	exon_unclassified
chr6	39658412	39658476	Peak_1346	4	-	1.74e-05	221458	KIF6	exon_unclassified
chr7	32963146	32963208	Peak_1417	8	-	9.00e-10	441212	RP9P	exon_unclassified
chr7	45025030	45025040	Peak_1419	8	-	8.38e-05	677798	SNORA9	exon_unclassified
chr8	99054367	99054382	Peak_1501	9	-	7.10e-10	6156	RPL30	exon_unclassified
chr9	35657928	35657930	Peak_1564	209	-	1.91e-09	6023	RMRP	exon_unclassified
chr9	98072604	98072671	Peak_1572	4	-	1.18e-03	2176	FANCC	exon_unclassified
chr9	130210791	130210817	Peak_1583	10	-	2.69e-08	26783	SNORA65	exon_unclassified
chr9	139621252	139621265	Peak_1588	15	-	1.00e-100	84973	SNHG7	exon_unclassified
chrX	56843757	56843782	Peak_1600	7	+	1.00e-100	550643	LOC550643	exon_unclassified
chrX	73047372	73047398	Peak_1625	8	-	5.28e-06	7503	XIST	exon_unclassified
chr1	1615718	1615789	Peak_94	6	-	1.71e-06	728661	SLC35E2B	intron
chr1	1615718	1615789	Peak_95	6	-	3.88e-05	984	CDK11B	intron
chr1	2300747	2300812	Peak_96	4	-	1.23e-02	79906	MORN1	intron
chr1	8624838	8624914	Peak_98	5	-	5.58e-03	473	RERE	intron
chr1	8665754	8665817	Peak_99	6	-	2.01e-05	473	RERE	intron
chr1	21494170	21494264	Peak_100	6	-	3.11e-07	8672	EIF4G3	intron
chr1	25949529	25949570	Peak_5	3	+	4.62e-02	57134	MAN1C1	intron
chr1	28834130	28834164	Peak_7	26	+	1.14e-09	8420	SNHG3	intron
chr1	28834130	28834164	Peak_8	26	+	1.70e-10	1104	RCC1	intron
chr1	32523093	32523168	Peak_11	8	+	3.78e-08	10657	KHDRBS1	intron
chr1	41637134	41637205	Peak_105	7	-	1.00e-100	22955	SCMH1	intron
chr1	43872944	43873007	Peak_17	4	+	3.31e-02	23334	SZT2	intron
chr1	44714335	44714394	Peak_106	5	-	1.36e-04	79033	ERI3	intron
chr1	47731412	47731475	Peak_108	8	-	1.00e-100	6491	STIL	intron
chr1	47823785	47823831	Peak_23	11	+	1.00e-100	51727	CMPK1	intron
chr1	50995904	50995958	Peak_112	5	-	2.96e-05	11124	FAF1	intron
chr1	51274276	51274340	Peak_113	8	-	1.00e-100	11124	FAF1	intron
chr1	51388453	51388507	Peak_114	4	-	1.92e-02	11124	FAF1	intron
chr1	57888003	57888023	Peak_118	5	-	3.19e-04	1600	DAB1	intron
chr1	57889996	57889999	Peak_119	5	-	3.19e-04	1600	DAB1	intron
chr1	57967943	57968001	Peak_120	10	-	1.00e-100	1600	DAB1	intron
chr1	62157163	62157205	Peak_121	4	-	6.34e-03	83941	TM2D1	intron
chr1	62390881	62390945	Peak_30	6	+	1.00e-100	10207	INADL	intron
chr1	63078149	63078229	Peak_122	6	-	7.20e-08	85440	DOCK7	intron
chr1	65251054	65251141	Peak_31	5	+	7.24e-04	55225	RAVER2	intron
chr1	65409855	65409921	Peak_123	8	-	1.10e-12	3716	JAK1	intron
chr1	68383503	68383572	Peak_33	3	+	9.43e-03	100289178	GNG12-AS1	intron
chr1	71423695	71423748	Peak_128	7	-	1.00e-08	5733	PTGER3	intron
chr1	86137092	86137146	Peak_130	5	-	3.33e-05	54680	ZNHIT6	intron
chr1	87401143	87401196	Peak_35	9	+	3.35e-09	9653	HS2ST1	intron
chr1	89411957	89412018	Peak_131	9	-	1.00e-100	56267	CCBL2	intron
chr1	91440534	91440595	Peak_132	6	-	8.00e-06	84146	ZNF644	intron
chr1	93005043	93005106	Peak_133	5	-	3.56e-05	7813	EVI5	intron
chr1	93566932	93566983	Peak_38	9	+	1.00e-100	22823	MTF2	intron
chr1	93567141	93567237	Peak_39	8	+	2.05e-09	22823	MTF2	intron
chr1	97257393	97257452	Peak_42	9	+	1.00e-100	58155	PTBP2	intron
chr1	97568015	97568084	Peak_135	4	-	9.61e-04	1806	DPYD	intron
chr1	98289119	98289155	Peak_136	4	-	9.61e-04	1806	DPYD	intron
chr1	110119645	110119682	Peak_43	5	+	4.30e-03	2773	GNAI3	intron
chr1	111143185	111143221	Peak_141	8	-	2.85e-08	3737	KCNA2	intron
chr1	113082226	113082286	Peak_142	9	-	1.00e-100	54879	ST7L	intron
chr1	144064501	144064544	Peak_50	6	+	6.12e-09	647135	SRGAP2B	intron
chr1	147442727	147442786	Peak_52	4	+	1.43e-05	728932	GPR89C	intron
chr1	147442727	147442786	Peak_54	4	+	3.97e-04	728932	GPR89C	intron
chr1	153875631	153875701	Peak_149	5	-	4.00e-03	57459	GATAD2B	intron
chr1	155748962	155749052	Peak_152	10	-	1.00e-100	55249	YY1AP1	intron
chr1	155748962	155749052	Peak_153	10	-	1.88e-09	54856	GON4L	intron
chr1	156186296	156186301	Peak_56	98	+	1.00e-100	100527963	PMF1-BGLAP	intron
chr1	156186296	156186301	Peak_58	98	+	1.00e-100	11243	PMF1	intron
chr1	156186587	156186591	Peak_57	39	+	1.00e-100	100527963	PMF1-BGLAP	intron
chr1	156186587	156186591	Peak_59	39	+	1.00e-100	11243	PMF1	intron
chr1	162293841	162293857	Peak_61	5	+	3.31e-05	9722	NOS1AP	intron
chr1	163300821	163300884	Peak_63	6	+	2.20e-05	83540	NUF2	intron
chr1	168214094	168214155	Peak_66	8	+	4.77e-07	9095	TBX19	intron
chr1	168214898	168214910	Peak_67	13	+	1.00e-100	9095	TBX19	intron
chr1	169280608	169280666	Peak_158	5	-	2.02e-08	29922	NME7	intron
chr1	172398365	172398420	Peak_69	5	+	4.00e-06	92346	C1orf105	intron
chr1	174876461	174876510	Peak_71	5	+	9.88e-07	9910	RABGAP1L	intron
chr1	180074629	180074662	Peak_76	4	+	5.30e-03	9857	CEP350	intron
chr1	180822769	180822843	Peak_77	5	+	8.09e-05	9213	XPR1	intron
chr1	183707661	183707728	Peak_79	6	+	6.51e-08	23179	RGL1	intron
chr1	185030268	185030304	Peak_80	6	+	6.89e-07	6045	RNF2	intron
chr1	185716457	185716508	Peak_81	5	+	6.98e-04	83872	HMCN1	intron
chr1	186370611	186370664	Peak_82	4	+	2.94e-02	54953	C1orf27	intron
chr1	200739553	200739645	Peak_84	6	+	2.49e-08	23271	CAMSAP2	intron
chr1	201929896	201930021	Peak_86	6	+	2.44e-03	10440	TIMM17A	intron
chr1	203040307	203040359	Peak_87	4	+	1.27e-03	8497	PPFIA4	intron
chr1	203806590	203806640	Peak_88	8	+	1.00e-09	9877	ZC3H11A	intron
chr1	224446628	224446699	Peak_169	5	-	2.28e-05	4931	NVL	intron
chr1	225266493	225266546	Peak_91	4	+	1.06e-06	127602	DNAH14	intron
chr1	225603818	225603910	Peak_171	6	-	1.32e-03	3930	LBR	intron
chr1	226046607	226046673	Peak_173	8	-	1.00e-100	9725	TMEM63A	intron
chr1	226466054	226466141	Peak_174	7	-	1.00e-100	286826	LIN9	intron
chr1	227757680	227757752	Peak_92	4	+	1.56e-03	339500	ZNF678	intron
chr1	229776764	229776850	Peak_93	10	+	5.81e-10	9816	URB2	intron
chr1	233415101	233415164	Peak_176	4	-	1.43e-04	80003	PCNXL2	intron
chr1	247072631	247072711	Peak_180	8	-	1.00e-100	25909	AHCTF1	intron
chr10	7911224	7911316	Peak_181	5	+	8.80e-06	83860	TAF3	intron
chr10	11926687	11926710	Peak_204	12	-	1.00e-100	219731	LOC219731	intron
chr10	12530715	12530769	Peak_183	4	+	3.54e-02	57118	CAMK1D	intron
chr10	15207831	15207882	Peak_205	5	-	7.36e-06	9397	NMT2	intron
chr10	18900682	18900723	Peak_207	4	-	4.63e-02	221078	NSUN6	intron
chr10	22155035	22155070	Peak_208	4	-	9.43e-03	64215	DNAJC1	intron
chr10	24512646	24512702	Peak_185	4	+	1.16e-02	56243	KIAA1217	intron
chr10	27016418	27016493	Peak_187	8	+	1.00e-100	23590	PDSS1	intron
chr10	28817339	28817396	Peak_209	6	-	2.61e-04	220906	LOC220906	intron
chr10	32642000	32642091	Peak_211	8	-	1.00e-100	80314	EPC1	intron
chr10	35377354	35377444	Peak_212	7	-	1.00e-100	8453	CUL2	intron
chr10	35715109	35715180	Peak_188	5	+	2.80e-05	219771	CCNY	intron
chr10	43640872	43640916	Peak_189	9	+	1.00e-100	55454	CSGALNACT2	intron
chr10	65082516	65082569	Peak_217	7	-	1.00e-100	221037	JMJD1C	intron
chr10	70055193	70055264	Peak_218	9	-	8.61e-10	64081	PBLD	intron
chr10	70282542	70282584	Peak_219	8	-	7.75e-10	8034	SLC25A16	intron
chr10	70391203	70391268	Peak_191	5	+	3.43e-06	80312	TET1	intron
chr10	70497261	70497295	Peak_192	6	+	4.08e-04	55749	CCAR1	intron
chr10	72082382	72082453	Peak_220	4	-	3.00e-03	55222	LRRC20	intron
chr10	76175741	76175816	Peak_197	4	+	4.16e-03	132	ADK	intron
chr10	79658179	79658205	Peak_225	4	-	1.72e-03	9231	DLG5	intron
chr10	90238620	90238675	Peak_226	3	-	2.69e-03	55328	RNLS	intron
chr10	94681004	94681034	Peak_198	8	+	1.00e-100	54536	EXOC6	intron
chr10	95265609	95265688	Peak_199	4	+	2.98e-02	55165	CEP55	intron
chr10	102285344	102285406	Peak_232	5	-	1.15e-04	4714	NDUFB8	intron
chr10	112342696	112342763	Peak_201	8	+	6.31e-10	9126	SMC3	intron
chr10	126475922	126476020	Peak_234	10	-	1.00e-100	399818	METTL10	intron
chr10	126475922	126476020	Peak_235	10	-	5.66e-10	9679	FAM53B	intron
chr10	126787305	126787316	Peak_236	9	-	1.00e-100	1488	CTBP2	intron
chr10	127580787	127580887	Peak_237	4	-	1.24e-03	55760	DHX32	intron
chr10	129161281	129161317	Peak_202	6	+	1.12e-08	1793	DOCK1	intron
chr10	131362264	131362308	Peak_203	5	+	3.30e-05	4255	MGMT	intron
chr10	131746470	131746541	Peak_238	6	-	7.75e-03	253738	EBF3	intron
chr10	133795206	133795225	Peak_239	4	-	3.74e-02	664	BNIP3	intron
chr11	852796	852849	Peak_241	6	+	1.73e-02	7106	TSPAN4	intron
chr11	4069053	4069134	Peak_242	6	+	8.13e-09	6786	STIM1	intron
chr11	12731878	12731921	Peak_245	5	+	6.43e-04	7003	TEAD1	intron
chr11	12859355	12859418	Peak_246	7	+	4.63e-09	7003	TEAD1	intron
chr11	18622074	18622133	Peak_251	7	+	5.67e-07	100506540	LOC100506540	intron
chr11	33171742	33171778	Peak_307	8	-	1.32e-09	1479	CSTF3	intron
chr11	33181092	33181154	Peak_308	7	-	1.88e-07	1479	CSTF3	intron
chr11	33767259	33767281	Peak_309	5	-	5.50e-03	26273	FBXO3	intron
chr11	33779417	33779509	Peak_310	6	-	3.36e-05	26273	FBXO3	intron
chr11	35997389	35997430	Peak_260	7	+	1.00e-100	143458	LDLRAD3	intron
chr11	40285456	40285520	Peak_312	4	-	8.11e-05	57689	LRRC4C	intron
chr11	43455756	43455800	Peak_261	7	+	2.80e-08	55761	TTC17	intron
chr11	44913630	44913693	Peak_265	5	+	9.05e-06	90139	TSPAN18	intron
chr11	46113583	46113651	Peak_314	8	-	1.00e-100	51317	PHF21A	intron
chr11	46490310	46490372	Peak_315	5	-	2.45e-03	55626	AMBRA1	intron
chr11	46603314	46603358	Peak_316	8	-	3.38e-09	55626	AMBRA1	intron
chr11	46782751	46782813	Peak_317	9	-	1.00e-100	9793	CKAP5	intron
chr11	46835619	46835690	Peak_318	17	-	1.00e-100	9793	CKAP5	intron
chr11	46844257	46844303	Peak_319	6	-	1.91e-03	9793	CKAP5	intron
chr11	46927344	46927417	Peak_320	10	-	1.00e-100	4038	LRP4	intron
chr11	47050565	47050604	Peak_266	12	+	1.00e-100	79096	C11orf49	intron
chr11	47162155	47162225	Peak_267	7	+	3.90e-09	79096	C11orf49	intron
chr11	47248656	47248720	Peak_268	6	+	7.57e-05	1643	DDB2	intron
chr11	47536197	47536253	Peak_322	6	-	1.04e-02	10658	CELF1	intron
chr11	57548797	57548862	Peak_269	5	+	1.75e-03	1500	CTNND1	intron
chr11	57548797	57548862	Peak_270	5	+	4.22e-03	1500	CTNND1	intron
chr11	63504451	63504481	Peak_277	5	+	2.58e-02	10313	RTN3	intron
chr11	63516144	63516208	Peak_278	5	+	2.58e-02	10313	RTN3	intron
chr11	63833721	63833774	Peak_327	6	-	1.81e-03	28992	MACROD1	intron
chr11	66987034	66987100	Peak_285	5	+	1.47e-04	22992	KDM2A	intron
chr11	68277224	68277272	Peak_286	7	+	3.97e-08	55291	PPP6R3	intron
chr11	69067792	69067857	Peak_287	5	+	7.49e-03	26579	MYEOV	intron
chr11	72749357	72749400	Peak_330	4	-	1.59e-03	9873	FCHSD2	intron
chr11	73293481	73293553	Peak_331	4	-	9.67e-03	23201	FAM168A	intron
chr11	77523905	77523940	Peak_334	4	-	7.61e-03	51773	RSF1	intron
chr11	83314070	83314120	Peak_335	4	-	9.01e-03	1740	DLG2	intron
chr11	83441150	83441207	Peak_336	5	-	8.04e-06	1740	DLG2	intron
chr11	83445367	83445430	Peak_337	4	-	9.01e-03	1740	DLG2	intron
chr11	86236692	86236748	Peak_338	3	-	1.02e-02	10873	ME3	intron
chr11	86903039	86903108	Peak_293	4	+	1.61e-02	65084	TMEM135	intron
chr11	86993300	86993369	Peak_294	5	+	2.74e-05	65084	TMEM135	intron
chr11	102033722	102033767	Peak_295	6	+	4.78e-06	10413	YAP1	intron
chr11	107668659	107668723	Peak_349	6	-	5.16e-05	54733	SLC35F2	intron
chr11	109988650	109988715	Peak_298	6	+	3.31e-07	85463	ZC3H12C	intron
chr11	111858391	111858451	Peak_299	7	+	1.59e-09	85458	DIXDC1	intron
chr11	118654749	118654806	Peak_355	6	-	2.11e-04	1656	DDX6	intron
chr11	119591045	119591116	Peak_356	4	-	4.78e-02	5818	PVRL1	intron
chr11	122945828	122945908	Peak_357	4	-	3.67e-02	79827	CLMP	intron
chr11	122989691	122989783	Peak_358	5	-	9.57e-05	79827	CLMP	intron
chr11	130781052	130781096	Peak_359	5	-	6.18e-04	399979	SNX19	intron
chr12	6789762	6789823	Peak_399	10	-	1.00e-100	171017	ZNF384	intron
chr12	24617217	24617269	Peak_402	9	-	1.76e-08	6660	SOX5	intron
chr12	32269622	32269685	Peak_363	10	+	1.00e-100	636	BICD1	intron
chr12	44911165	44911191	Peak_407	8	-	6.95e-09	4753	NELL2	intron
chr12	49903884	49903945	Peak_364	10	+	1.00e-100	65244	SPATS2	intron
chr12	50408744	50408835	Peak_410	8	-	2.49e-09	29127	RACGAP1	intron
chr12	53892727	53892740	Peak_411	8	-	6.87e-09	7786	MAP3K12	intron
chr12	56168273	56168349	Peak_414	7	-	4.13e-08	85406	DNAJC14	intron
chr12	56168273	56168349	Peak_415	7	-	2.01e-08	85406	DNAJC14	intron
chr12	56938552	56938631	Peak_368	4	+	2.15e-02	5939	RBMS2	intron
chr12	62952478	62952540	Peak_369	6	+	8.96e-09	23041	MON2	intron
chr12	64820905	64820981	Peak_370	10	+	1.00e-100	11260	XPOT	intron
chr12	66244300	66244341	Peak_372	12	+	2.44e-09	8091	HMGA2	intron
chr12	69123577	69123634	Peak_373	8	+	1.00e-100	57122	NUP107	intron
chr12	72093630	72093667	Peak_376	5	+	1.02e-02	55266	TMEM19	intron
chr12	72686983	72687050	Peak_377	4	+	1.06e-02	29953	TRHDE	intron
chr12	79263676	79263737	Peak_379	4	+	2.92e-02	6857	SYT1	intron
chr12	79735458	79735540	Peak_380	4	+	2.92e-02	6857	SYT1	intron
chr12	80297174	80297238	Peak_421	4	-	2.82e-02	4659	PPP1R12A	intron
chr12	93177667	93177702	Peak_422	7	-	1.10e-12	8411	EEA1	intron
chr12	109235860	109235929	Peak_428	4	-	2.90e-02	54434	SSH1	intron
chr12	110762236	110762276	Peak_385	7	+	4.14e-05	488	ATP2A2	intron
chr12	110825035	110825079	Peak_429	47	-	1.00e-100	51434	ANAPC7	intron
chr12	111859219	111859267	Peak_388	9	+	2.39e-06	10019	SH2B3	intron
chr12	112507516	112507634	Peak_430	7	-	5.79e-07	80018	NAA25	intron
chr12	112524765	112524827	Peak_431	10	-	1.41e-09	80018	NAA25	intron
chr12	112533347	112533432	Peak_432	5	-	1.70e-02	80018	NAA25	intron
chr12	117287605	117287651	Peak_390	4	+	1.84e-03	84900	RNFT2	intron
chr12	120071756	120071782	Peak_392	4	+	9.22e-03	387890	TMEM233	intron
chr12	121689506	121689637	Peak_434	6	-	4.98e-06	10645	CAMKK2	intron
chr12	123692352	123692413	Peak_435	5	-	3.18e-05	10198	MPHOSPH9	intron
chr12	125331226	125331288	Peak_437	10	-	1.48e-09	949	SCARB1	intron
chr12	131288179	131288227	Peak_438	9	-	1.00e-100	2054	STX2	intron
chr12	132314757	132314758	Peak_396	6	+	1.47e-02	4326	MMP17	intron
chr12	132423265	132423312	Peak_397	9	+	9.51e-09	80324	PUS1	intron
chr13	20291799	20291863	Peak_454	6	-	1.27e-05	55269	PSPC1	intron
chr13	20533387	20533448	Peak_439	4	+	4.24e-02	7750	ZMYM2	intron
chr13	28813299	28813366	Peak_440	4	+	2.60e-02	255967	PAN3	intron
chr13	31893546	31893589	Peak_441	4	+	2.72e-03	145173	B3GALTL	intron
chr13	36431572	36431659	Peak_460	5	-	4.00e-08	100302239	MIR548F5	intron
chr13	36431572	36431659	Peak_461	5	-	4.16e-07	100302239	MIR548F5	intron
chr13	37429292	37429397	Peak_463	6	-	1.09e-05	4093	SMAD9	intron
chr13	40032304	40032354	Peak_466	5	-	6.15e-03	10186	LHFP	intron
chr13	50680773	50680829	Peak_443	3	+	1.27e-02	10301	DLEU1	intron
chr13	52196998	52197037	Peak_444	7	+	3.04e-09	115825	WDFY2	intron
chr13	52597934	52597991	Peak_445	5	+	2.38e-04	440138	ALG11	intron
chr13	52597934	52597991	Peak_446	5	+	2.60e-04	9724	UTP14C	intron
chr13	98860163	98860232	Peak_448	5	+	5.34e-05	10160	FARP1	intron
chr13	102937225	102937273	Peak_469	4	-	5.26e-05	2259	FGF14	intron
chr13	108332921	108332974	Peak_470	4	-	7.78e-04	728215	FAM155A	intron
chr13	111127252	111127301	Peak_450	4	+	7.89e-03	1284	COL4A2	intron
chr14	30192837	30192896	Peak_501	5	-	3.58e-05	5587	PRKD1	intron
chr14	31486624	31486710	Peak_502	5	-	5.35e-04	29966	STRN3	intron
chr14	35056133	35056228	Peak_503	10	-	1.00e-100	58533	SNX6	intron
chr14	35223581	35223650	Peak_504	4	-	4.47e-02	11177	BAZ1A	intron
chr14	35325996	35326082	Peak_505	4	-	4.47e-02	11177	BAZ1A	intron
chr14	37350732	37350796	Peak_506	3	-	2.84e-02	89874	SLC25A21	intron
chr14	42078012	42078057	Peak_472	4	+	3.41e-02	145581	LRFN5	intron
chr14	42146568	42146626	Peak_473	4	+	3.41e-02	145581	LRFN5	intron
chr14	45600750	45600852	Peak_507	4	-	3.73e-02	2287	FKBP3	intron
chr14	50048710	50048746	Peak_508	8	-	4.91e-09	9147	NEMF	intron
chr14	50048710	50048746	Peak_509	8	-	1.60e-07	9147	NEMF	intron
chr14	50899229	50899292	Peak_510	5	-	6.52e-06	11183	MAP4K5	intron
chr14	54986140	54986185	Peak_476	9	+	1.00e-100	10668	CGRRF1	intron
chr14	63301602	63301647	Peak_512	4	-	1.96e-03	27133	KCNH5	intron
chr14	68576210	68576256	Peak_481	5	+	1.09e-07	5890	RAD51B	intron
chr14	73419236	73419287	Peak_482	4	+	7.21e-03	26094	DCAF4	intron
chr14	79953262	79953318	Peak_483	3	+	1.91e-04	9369	NRXN3	intron
chr14	85999465	85999527	Peak_484	5	+	3.33e-02	23768	FLRT2	intron
chr14	85999939	85999976	Peak_485	5	+	3.33e-02	23768	FLRT2	intron
chr14	89903446	89903542	Peak_516	6	-	1.59e-08	1112	FOXN3	intron
chr14	95067371	95067415	Peak_487	4	+	3.34e-03	12	SERPINA3	intron
chr14	99712066	99712090	Peak_520	6	-	3.04e-02	64919	BCL11B	intron
chr14	99887286	99887309	Peak_521	9	-	1.42e-09	84193	SETD3	intron
chr14	102232586	102232644	Peak_488	4	+	9.81e-03	5527	PPP2R5C	intron
chr14	102618082	102618115	Peak_489	4	+	7.27e-03	91833	WDR20	intron
chr14	103267041	103267108	Peak_491	6	+	3.70e-06	7187	TRAF3	intron
chr14	103286965	103287012	Peak_492	10	+	1.00e-100	7187	TRAF3	intron
chr14	103944889	103944956	Peak_493	4	+	7.37e-03	4140	MARK3	intron
chr14	103959600	103959681	Peak_494	5	+	1.29e-05	4140	MARK3	intron
chr14	104189841	104189894	Peak_495	5	+	2.35e-02	79038	ZFYVE21	intron
chr14	105183037	105183101	Peak_496	7	+	1.11e-06	64423	INF2	intron
chr14	105714229	105714264	Peak_524	5	-	4.18e-03	2972	BRF1	intron
chr14	105944009	105944059	Peak_497	6	+	3.05e-02	1397	CRIP2	intron
chr15	23068134	23068223	Peak_560	5	-	1.42e-03	123606	NIPA1	intron
chr15	28524902	28524969	Peak_561	5	-	2.75e-05	8924	HERC2	intron
chr15	30930026	30930085	Peak_528	12	+	1.05e-09	89839	ARHGAP11B	intron
chr15	38577062	38577129	Peak_529	6	+	3.57e-08	161742	SPRED1	intron
chr15	40248216	40248261	Peak_530	4	+	1.57e-02	440275	EIF2AK4	intron
chr15	40273812	40273869	Peak_531	7	+	1.00e-100	440275	EIF2AK4	intron
chr15	40734150	40734167	Peak_532	4	+	4.38e-02	22893	BAHD1	intron
chr15	42843197	42843272	Peak_535	6	+	2.01e-05	55142	HAUS2	intron
chr15	44124955	44124998	Peak_536	13	+	7.11e-10	79968	WDR76	intron
chr15	45361404	45361470	Peak_538	5	+	2.28e-03	6652	SORD	intron
chr15	55483585	55483639	Peak_564	4	-	2.79e-02	51187	RSL24D1	intron
chr15	57569011	57569127	Peak_541	8	+	1.00e-100	6938	TCF12	intron
chr15	62351056	62351136	Peak_568	4	-	2.17e-02	54832	VPS13C	intron
chr15	64087221	64087276	Peak_569	7	-	3.86e-09	8925	HERC1	intron
chr15	64642091	64642125	Peak_571	7	-	1.07e-08	53944	CSNK1G1	intron
chr15	64656777	64656817	Peak_572	5	-	1.37e-03	53944	CSNK1G1	intron
chr15	67914487	67914549	Peak_546	6	+	2.40e-07	5607	MAP2K5	intron
chr15	72779047	72779095	Peak_548	9	+	1.00e-100	25820	ARIH1	intron
chr15	72816324	72816368	Peak_549	5	+	1.94e-03	25820	ARIH1	intron
chr15	75839585	75839652	Peak_577	9	-	1.00e-100	5780	PTPN9	intron
chr15	75858986	75859030	Peak_578	9	-	1.00e-100	5780	PTPN9	intron
chr15	77345747	77345810	Peak_579	10	-	1.00e-100	10099	TSPAN3	intron
chr15	77910868	77910936	Peak_580	43	-	1.00e-100	84894	LINGO1	intron
chr15	89790005	89790069	Peak_550	5	+	1.52e-03	55215	FANCI	intron
chr15	90415297	90415365	Peak_581	5	-	1.13e-04	10239	AP3S2	intron
chr15	90415297	90415365	Peak_582	5	-	1.53e-04	10239	AP3S2	intron
chr15	90545166	90545231	Peak_551	4	+	3.12e-02	374655	ZNF710	intron
chr15	93432720	93432770	Peak_553	6	+	2.72e-03	1106	CHD2	intron
chr15	93432720	93432770	Peak_554	6	+	2.79e-06	1106	CHD2	intron
chr15	93466801	93466838	Peak_555	6	+	2.79e-06	1106	CHD2	intron
chr15	99799892	99799941	Peak_557	5	+	6.48e-05	123355	LRRC28	intron
chr15	99800160	99800221	Peak_558	9	+	1.00e-100	123355	LRRC28	intron
chr15	100234862	100234896	Peak_559	4	+	1.85e-03	4205	MEF2A	intron
chr16	590543	590544	Peak_583	8	+	6.69e-03	6650	SOLH	intron
chr16	969994	970047	Peak_632	6	-	2.71e-04	64788	LMF1	intron
chr16	1207415	1207457	Peak_584	8	+	3.73e-02	8912	CACNA1H	intron
chr16	1424985	1424997	Peak_633	6	-	1.15e-02	64718	UNKL	intron
chr16	2964916	2964969	Peak_585	8	+	9.39e-09	84256	FLYWCH1	intron
chr16	3753929	3754024	Peak_635	5	-	1.77e-02	10131	TRAP1	intron
chr16	3767176	3767181	Peak_636	7	-	6.99e-07	10131	TRAP1	intron
chr16	3895857	3895901	Peak_637	5	-	6.11e-05	1387	CREBBP	intron
chr16	6362659	6362736	Peak_588	4	+	2.23e-02	54715	RBFOX1	intron
chr16	6467420	6467483	Peak_589	10	+	1.00e-100	54715	RBFOX1	intron
chr16	7267299	7267364	Peak_590	7	+	1.00e-100	54715	RBFOX1	intron
chr16	15700358	15700408	Peak_639	4	-	9.46e-04	9665	KIAA0430	intron
chr16	17558929	17559021	Peak_640	3	-	4.03e-03	64131	XYLT1	intron
chr16	24061818	24061874	Peak_594	7	+	1.53e-06	5579	PRKCB	intron
chr16	25799868	25799955	Peak_598	4	+	6.35e-04	9951	HS3ST4	intron
chr16	52539821	52539894	Peak_654	4	-	2.13e-03	27324	TOX3	intron
chr16	54048765	54048808	Peak_615	4	+	5.21e-04	79068	FTO	intron
chr16	57881631	57881691	Peak_655	9	-	1.00e-100	3801	KIFC3	intron
chr16	58660258	58660329	Peak_656	4	-	4.18e-02	23019	CNOT1	intron
chr16	61813320	61813360	Peak_657	6	-	1.00e-100	1006	CDH8	intron
chr16	64999045	64999120	Peak_658	4	-	2.64e-02	1009	CDH11	intron
chr16	67085829	67085869	Peak_616	9	+	1.23e-09	865	CBFB	intron
chr16	68199304	68199349	Peak_620	5	+	1.08e-03	4775	NFATC3	intron
chr16	70172122	70172150	Peak_622	4	+	3.41e-02	55066	PDPR	intron
chr16	70195362	70195405	Peak_623	4	+	3.41e-02	283971	CLEC18C	intron
chr16	70560120	70560174	Peak_625	7	+	2.13e-05	23450	SF3B3	intron
chr16	71819432	71819496	Peak_661	10	-	1.00e-100	164	AP1G1	intron
chr16	73091659	73091702	Peak_662	5	-	8.43e-04	463	ZFHX3	intron
chr16	74526646	74526735	Peak_664	7	-	1.83e-05	2734	GLG1	intron
chr16	74562665	74562727	Peak_665	14	-	2.74e-09	2734	GLG1	intron
chr16	74601076	74601128	Peak_666	6	-	2.29e-03	2734	GLG1	intron
chr16	74675773	74675834	Peak_667	5	-	2.96e-03	55159	RFWD3	intron
chr16	75415991	75416032	Peak_669	7	-	4.79e-09	10428	CFDP1	intron
chr16	78591596	78591634	Peak_626	8	+	1.91e-08	51741	WWOX	intron
chr16	78830728	78830799	Peak_627	6	+	9.15e-07	51741	WWOX	intron
chr16	81549634	81549649	Peak_628	4	+	1.20e-02	80790	CMIP	intron
chr16	85647808	85647822	Peak_629	7	+	1.10e-02	23199	KIAA0182	intron
chr16	85766205	85766288	Peak_671	6	-	3.49e-05	404550	C16orf74	intron
chr16	89591365	89591418	Peak_630	10	+	1.69e-09	6687	SPG7	intron
chr16	89848036	89848096	Peak_673	6	-	6.02e-05	2175	FANCA	intron
chr16	89898842	89898913	Peak_631	4	+	3.55e-02	84501	SPIRE2	intron
chr17	637572	637637	Peak_674	7	+	2.71e-05	79850	FAM57A	intron
chr17	744728	744737	Peak_716	15	-	1.00e-100	64359	NXN	intron
chr17	882070	882098	Peak_717	7	-	7.85e-06	64359	NXN	intron
chr17	1911537	1911571	Peak_721	9	-	1.00e-100	146760	RTN4RL1	intron
chr17	2292533	2292570	Peak_723	6	-	4.09e-02	4335	MNT	intron
chr17	7477133	7477150	Peak_677	8	+	4.49e-03	100533955	SENP3-EIF4A1	intron
chr17	11180552	11180596	Peak_679	8	+	1.00e-100	388336	SHISA6	intron
chr17	17644411	17644463	Peak_683	7	+	3.02e-06	10743	RAI1	intron
chr17	18770220	18770256	Peak_684	4	+	1.48e-02	5636	PRPSAP2	intron
chr17	19196863	19196941	Peak_685	7	+	4.08e-08	22905	EPN2	intron
chr17	25633247	25633358	Peak_686	5	+	4.67e-02	26118	WSB1	intron
chr17	27722856	27722924	Peak_687	9	+	1.00e-100	57551	TAOK1	intron
chr17	27855994	27856052	Peak_689	6	+	2.98e-04	57551	TAOK1	intron
chr17	28012724	28012818	Peak_725	5	-	7.31e-04	85464	SSH2	intron
chr17	28498979	28499017	Peak_690	9	+	1.00e-100	84081	NSRP1	intron
chr17	29426585	29426663	Peak_691	5	+	1.67e-07	4763	NF1	intron
chr17	30181294	30181395	Peak_726	7	-	4.25e-06	55352	C17orf79	intron
chr17	31519402	31519472	Peak_727	5	-	1.10e-12	40	ASIC2	intron
chr17	34878283	34878346	Peak_728	6	-	4.69e-07	80179	MYO19	intron
chr17	35311369	35311436	Peak_692	6	+	2.77e-08	26574	AATF	intron
chr17	35531105	35531177	Peak_729	5	-	6.46e-07	31	ACACA	intron
chr17	35815463	35815548	Peak_694	4	+	5.06e-03	6871	TADA2A	intron
chr17	36945144	36945208	Peak_730	10	-	1.00e-100	8396	PIP4K2B	intron
chr17	37632985	37633036	Peak_695	7	+	2.75e-08	51755	CDK12	intron
chr17	37637916	37637970	Peak_696	8	+	1.00e-100	51755	CDK12	intron
chr17	38534017	38534049	Peak_697	4	+	8.49e-03	5914	RARA	intron
chr17	40059901	40060016	Peak_731	5	-	2.30e-04	47	ACLY	intron
chr17	40162286	40162353	Peak_732	5	-	1.38e-04	7266	DNAJC7	intron
chr17	41588829	41588885	Peak_698	8	+	1.00e-100	1659	DHX8	intron
chr17	42128697	42128766	Peak_733	8	-	3.38e-09	124801	LSM12	intron
chr17	47412095	47412151	Peak_734	6	-	3.53e-06	22834	ZNF652	intron
chr17	55531805	55531856	Peak_702	12	+	1.00e-100	124540	MSI2	intron
chr17	57011453	57011523	Peak_703	5	+	4.27e-05	22843	PPM1E	intron
chr17	57979946	57980024	Peak_705	8	+	1.00e-100	6198	RPS6KB1	intron
chr17	59882255	59882348	Peak_736	8	-	1.00e-100	83990	BRIP1	intron
chr17	61175810	61175865	Peak_706	3	+	2.50e-02	26115	TANC2	intron
chr17	65412331	65412388	Peak_707	5	+	7.79e-06	26207	PITPNC1	intron
chr17	65450938	65451001	Peak_708	8	+	1.00e-100	26207	PITPNC1	intron
chr17	71574741	71574824	Peak_738	4	-	4.15e-04	54549	SDK2	intron
chr17	73226145	73226202	Peak_711	5	+	8.05e-04	79902	NUP85	intron
chr17	76214688	76214755	Peak_713	6	+	3.10e-03	332	BIRC5	intron
chr17	76766175	76766239	Peak_739	5	-	1.86e-05	9267	CYTH1	intron
chr17	80103340	80103427	Peak_742	6	-	1.25e-06	284001	CCDC57	intron
chr17	80508384	80508457	Peak_714	13	+	1.00e-100	3607	FOXK2	intron
chr17	80891156	80891235	Peak_715	11	+	3.27e-09	6904	TBCD	intron
chr18	667101	667105	Peak_743	6	+	2.72e-03	7298	TYMS	intron
chr18	3638514	3638560	Peak_758	6	-	2.20e-05	9229	DLGAP1	intron
chr18	3740992	3741034	Peak_759	7	-	4.93e-08	9229	DLGAP1	intron
chr18	9493131	9493197	Peak_745	6	+	2.95e-06	10928	RALBP1	intron
chr18	19385867	19385900	Peak_747	6	+	1.51e-06	57534	MIB1	intron
chr18	20591406	20591478	Peak_749	9	+	1.60e-09	5932	RBBP8	intron
chr18	24126138	24126198	Peak_760	7	-	1.00e-100	284252	KCTD1	intron
chr18	33628554	33628615	Peak_761	5	-	1.97e-04	55197	RPRD1A	intron
chr18	45405838	45405894	Peak_762	5	-	2.09e-03	4087	SMAD2	intron
chr18	46067467	46067469	Peak_752	4	+	2.46e-03	9811	CTIF	intron
chr18	49956908	49956978	Peak_754	6	+	2.89e-06	1630	DCC	intron
chr18	50066970	50067038	Peak_755	7	+	1.00e-100	1630	DCC	intron
chr18	54300632	54300693	Peak_764	9	-	8.29e-10	9352	TXNL1	intron
chr18	60428869	60428953	Peak_756	4	+	1.93e-03	23239	PHLPP1	intron
chr18	60959404	60959470	Peak_767	5	-	1.90e-05	596	BCL2	intron
chr18	72426802	72426846	Peak_757	3	+	3.67e-02	55628	ZNF407	intron
chr19	718653	718655	Peak_771	6	+	9.46e-04	5064	PALM	intron
chr19	1411228	1411234	Peak_774	10	+	1.20e-03	26528	DAZAP1	intron
chr19	1412481	1412508	Peak_775	13	+	6.72e-08	26528	DAZAP1	intron
chr19	2010582	2010651	Peak_819	10	-	1.00e-100	55643	BTBD2	intron
chr19	2144023	2144093	Peak_820	20	-	8.67e-10	8943	AP3D1	intron
chr19	2270367	2270373	Peak_776	14	+	1.59e-04	56928	SPPL2B	intron
chr19	2270367	2270373	Peak_777	14	+	1.00e-100	56928	SPPL2B	intron
chr19	2270715	2270730	Peak_778	11	+	1.00e-100	4946	OAZ1	intron
chr19	2271132	2271165	Peak_779	7	+	3.77e-04	4946	OAZ1	intron
chr19	3016480	3016597	Peak_821	7	-	1.10e-12	7089	TLE2	intron
chr19	3372852	3372915	Peak_780	7	+	1.69e-02	4782	NFIC	intron
chr19	4035801	4035829	Peak_784	6	+	3.43e-03	51588	PIAS4	intron
chr19	4709876	4709948	Peak_824	4	-	2.43e-02	91039	DPP9	intron
chr19	4857513	4857589	Peak_825	6	-	1.03e-06	10226	PLIN3	intron
chr19	5083711	5083744	Peak_787	7	+	1.36e-05	23030	KDM4B	intron
chr19	5698253	5698294	Peak_826	5	-	1.40e-02	9361	LONP1	intron
chr19	5708961	5709025	Peak_827	7	-	6.76e-07	9361	LONP1	intron
chr19	8372136	8372180	Peak_829	6	-	1.01e-03	51293	CD320	intron
chr19	12054250	12054285	Peak_788	4	+	6.08e-03	284390	ZNF763	intron
chr19	13912488	13912588	Peak_793	6	+	3.84e-06	65249	ZSWIM4	intron
chr19	15504655	15504722	Peak_831	5	-	3.38e-02	26993	AKAP8L	intron
chr19	15644404	15644491	Peak_794	7	+	4.41e-07	126410	CYP4F22	intron
chr19	16188742	16188782	Peak_795	7	+	2.06e-06	7171	TPM4	intron
chr19	16665586	16665647	Peak_832	9	-	1.00e-100	79939	SLC35E1	intron
chr19	16665586	16665647	Peak_833	9	-	3.86e-10	79939	SLC35E1	intron
chr19	17183724	17183768	Peak_834	7	-	5.28e-07	93323	HAUS8	intron
chr19	18081131	18081192	Peak_798	8	+	8.17e-10	3780	KCNN1	intron
chr19	34897300	34897389	Peak_802	8	+	1.12e-09	84306	PDCD2L	intron
chr19	42757818	42757830	Peak_838	10	-	6.24e-04	2077	ERF	intron
chr19	45159139	45159192	Peak_805	10	+	1.00e-100	5817	PVR	intron
chr19	46360616	46360618	Peak_841	5	-	3.17e-03	8189	SYMPK	intron
chr19	47189672	47189747	Peak_842	6	-	2.93e-08	25865	PRKD2	intron
chr19	47639762	47639827	Peak_809	5	+	1.76e-04	10055	SAE1	intron
chr19	47704637	47704702	Peak_810	6	+	4.55e-07	10055	SAE1	intron
chr19	49492307	49492381	Peak_845	7	-	9.40e-07	2997	GYS1	intron
chr19	51044602	51044638	Peak_846	10	-	8.77e-10	94030	LRRC4B	intron
chr19	51303976	51304020	Peak_847	11	-	2.03e-08	84798	C19orf48	intron
chr19	56632169	56632183	Peak_848	7	-	7.89e-06	126208	ZNF787	intron
chr19	58202520	58202581	Peak_815	5	+	3.28e-05	284309	ZNF776	intron
chr19	58294039	58294101	Peak_816	5	+	5.05e-03	54807	ZNF586	intron
chr19	58294039	58294101	Peak_817	5	+	3.92e-03	54807	ZNF586	intron
chr2	263844	263881	Peak_907	4	-	1.01e-02	26751	SH3YL1	intron
chr2	3329226	3329290	Peak_908	4	-	1.78e-02	7260	TSSC1	intron
chr2	9103300	9103374	Peak_909	4	-	1.97e-03	129642	MBOAT2	intron
chr2	9765314	9765403	Peak_911	5	-	4.39e-03	10971	YWHAQ	intron
chr2	10312454	10312503	Peak_850	4	+	4.98e-02	348738	C2orf48	intron
chr2	11604587	11604657	Peak_912	8	-	7.46e-10	1876	E2F6	intron
chr2	20898312	20898439	Peak_914	4	-	2.39e-03	60526	C2orf43	intron
chr2	23608816	23608883	Peak_852	5	+	2.93e-03	114818	KLHL29	intron
chr2	23608946	23609018	Peak_853	5	+	2.93e-03	114818	KLHL29	intron
chr2	23771203	23771264	Peak_854	6	+	9.97e-06	114818	KLHL29	intron
chr2	24478865	24478936	Peak_915	7	-	1.00e-100	50618	ITSN2	intron
chr2	27133956	27134021	Peak_856	7	+	2.98e-07	56896	DPYSL5	intron
chr2	30112548	30112606	Peak_916	7	-	1.25e-08	238	ALK	intron
chr2	30468831	30468888	Peak_861	12	+	4.88e-10	81606	LBH	intron
chr2	30702104	30702134	Peak_862	6	+	3.71e-08	253558	LCLAT1	intron
chr2	32230339	32230401	Peak_917	6	-	2.94e-08	51072	MEMO1	intron
chr2	32305877	32305996	Peak_864	7	+	8.05e-09	6683	SPAST	intron
chr2	44447166	44447237	Peak_865	4	+	1.45e-02	5495	PPM1B	intron
chr2	61422030	61422093	Peak_919	8	-	1.00e-100	9736	USP34	intron
chr2	61628223	61628292	Peak_920	5	-	1.75e-04	9736	USP34	intron
chr2	62110476	62110563	Peak_921	6	-	1.73e-04	10575	CCT4	intron
chr2	62432158	62432226	Peak_867	4	+	4.35e-02	10678	B3GNT2	intron
chr2	66664006	66664036	Peak_869	4	+	2.15e-02	4211	MEIS1	intron
chr2	72713418	72713509	Peak_923	7	-	2.22e-08	23233	EXOC6B	intron
chr2	72762940	72763006	Peak_924	6	-	1.77e-07	23233	EXOC6B	intron
chr2	77736306	77736367	Peak_925	6	-	1.00e-100	80059	LRRTM4	intron
chr2	86956765	86956824	Peak_874	4	+	1.13e-03	64795	RMND5A	intron
chr2	87781929	87782004	Peak_876	4	+	1.13e-03	112597	LINC00152	intron
chr2	87781929	87782004	Peak_877	4	+	4.22e-02	64795	RMND5A	intron
chr2	98188049	98188116	Peak_927	4	-	6.06e-04	57730	ANKRD36B	intron
chr2	102402195	102402229	Peak_879	6	+	2.63e-07	9448	MAP4K4	intron
chr2	110357010	110357047	Peak_928	9	-	2.45e-09	151011	SEPT10	intron
chr2	111985373	111985431	Peak_929	6	-	1.97e-08	541471	LOC541471	intron
chr2	118724357	118724392	Peak_930	5	-	2.30e-04	54520	CCDC93	intron
chr2	118740286	118740339	Peak_931	6	-	5.96e-07	54520	CCDC93	intron
chr2	121676023	121676085	Peak_884	6	+	3.58e-05	2736	GLI2	intron
chr2	122405155	122405172	Peak_932	4	-	3.99e-02	23332	CLASP1	intron
chr2	128552365	128552414	Peak_934	4	-	1.77e-02	55339	WDR33	intron
chr2	129073705	129073763	Peak_935	6	-	2.86e-02	9394	HS6ST1	intron
chr2	131872923	131872974	Peak_886	5	+	5.97e-08	55041	PLEKHB2	intron
chr2	133818606	133818646	Peak_938	4	-	4.23e-04	344148	NCKAP5	intron
chr2	135902969	135903008	Peak_887	6	+	2.34e-08	22930	RAB3GAP1	intron
chr2	145089559	145089598	Peak_939	4	-	1.09e-04	79712	GTDC1	intron
chr2	153199824	153199882	Peak_889	4	+	1.84e-02	114793	FMNL2	intron
chr2	158724940	158725007	Peak_942	7	-	1.00e-100	90	ACVR1	intron
chr2	166455855	166455894	Peak_892	4	+	1.85e-02	80034	CSRNP3	intron
chr2	166726035	166726101	Peak_944	4	-	3.57e-02	100506124	LOC100506124	intron
chr2	166726035	166726101	Peak_945	4	-	7.01e-03	100506124	LOC100506124	intron
chr2	172707934	172708011	Peak_947	7	-	1.00e-100	8604	SLC25A12	intron
chr2	174101752	174101801	Peak_895	5	+	2.72e-06	51776	ZAK	intron
chr2	175083988	175084018	Peak_948	4	-	2.60e-02	29789	OLA1	intron
chr2	175953278	175953310	Peak_949	4	-	1.86e-02	1386	ATF2	intron
chr2	178128725	178128745	Peak_951	4	-	6.57e-03	4780	NFE2L2	intron
chr2	179299153	179299230	Peak_897	4	+	8.57e-04	100302152	MIR548N	intron
chr2	183048692	183048767	Peak_952	4	-	2.38e-02	5136	PDE1A	intron
chr2	198277666	198277704	Peak_954	8	-	1.47e-09	23451	SF3B1	intron
chr2	203085881	203085959	Peak_957	5	-	6.32e-03	7341	SUMO1	intron
chr2	204375012	204375077	Peak_958	10	-	1.00e-100	65059	RAPH1	intron
chr2	212529006	212529079	Peak_963	7	-	5.98e-08	2066	ERBB4	intron
chr2	213175314	213175361	Peak_964	6	-	1.66e-05	2066	ERBB4	intron
chr2	213251275	213251308	Peak_965	9	-	1.99e-08	2066	ERBB4	intron
chr2	213302177	213302224	Peak_966	7	-	5.98e-08	2066	ERBB4	intron
chr2	213339502	213339553	Peak_967	5	-	5.54e-03	2066	ERBB4	intron
chr2	213353023	213353063	Peak_968	8	-	1.99e-08	2066	ERBB4	intron
chr2	213363974	213364009	Peak_969	6	-	1.66e-05	2066	ERBB4	intron
chr2	217336086	217336142	Peak_903	9	+	1.00e-100	50485	SMARCAL1	intron
chr2	238727266	238727304	Peak_905	4	+	6.48e-03	375316	RBM44	intron
chr2	241963309	241963366	Peak_906	6	+	3.77e-07	25992	SNED1	intron
chr20	2986670	2986742	Peak_975	4	+	3.14e-02	5786	PTPRA	intron
chr20	3488350	3488410	Peak_976	8	+	1.00e-100	8455	ATRN	intron
chr20	5820129	5820191	Peak_979	3	+	4.24e-02	149840	C20orf196	intron
chr20	8490388	8490454	Peak_981	4	+	1.96e-05	23236	PLCB1	intron
chr20	26189084	26189097	Peak_1000	109	-	3.81e-10	284801	LOC284801	intron
chr20	26189348	26189357	Peak_1001	118	-	3.81e-10	284801	LOC284801	intron
chr20	32964221	32964259	Peak_984	5	+	1.84e-03	83737	ITCH	intron
chr20	34306850	34306898	Peak_1004	5	-	2.34e-02	9584	RBM39	intron
chr20	39924404	39924499	Peak_1007	8	-	1.00e-100	23051	ZHX3	intron
chr20	51625102	51625138	Peak_992	6	+	1.00e-100	128553	TSHZ2	intron
chr20	57405315	57405319	Peak_1013	6	-	6.09e-04	149775	GNAS-AS1	intron
chr20	57467451	57467486	Peak_993	5	+	2.74e-04	2778	GNAS	intron
chr20	62531242	62531276	Peak_994	9	+	1.00e-100	80331	DNAJC5	intron
chr21	22823890	22823943	Peak_1015	4	+	7.64e-03	4685	NCAM2	intron
chr21	34968260	34968305	Peak_1025	4	-	5.71e-04	29980	DONSON	intron
chr21	34968260	34968305	Peak_1026	4	-	3.83e-03	29980	DONSON	intron
chr21	38445973	38446014	Peak_1016	6	+	1.95e-05	7267	TTC3	intron
chr21	38740245	38740273	Peak_1017	7	+	2.53e-09	1859	DYRK1A	intron
chr21	44442292	44442346	Peak_1018	4	+	3.03e-02	5316	PKNOX1	intron
chr21	45326921	45326995	Peak_1019	7	+	3.60e-06	56894	AGPAT3	intron
chr21	45463096	45463155	Peak_1020	8	+	1.00e-100	7109	TRAPPC10	intron
chr21	47947249	47947289	Peak_1021	5	+	6.39e-05	23181	DIP2A	intron
chr22	19470502	19470573	Peak_1028	6	+	1.37e-06	8318	CDC45	intron
chr22	24557788	24557824	Peak_1031	4	+	3.06e-02	23523	CABIN1	intron
chr22	24820092	24820158	Peak_1032	4	+	1.65e-02	135	ADORA2A	intron
chr22	24970529	24970541	Peak_1033	5	+	6.50e-03	6634	SNRPD3	intron
chr22	25858060	25858134	Peak_1034	5	+	7.08e-06	1416	CRYBB2P1	intron
chr22	26942012	26942053	Peak_1045	11	-	1.00e-100	8459	TPST2	intron
chr22	28868521	28868573	Peak_1046	7	-	1.00e-100	23331	TTC28	intron
chr22	39761998	39762056	Peak_1036	6	+	1.98e-07	9145	SYNGR1	intron
chr22	39761998	39762056	Peak_1037	6	+	1.13e-05	10454	TAB1	intron
chr22	40944315	40944370	Peak_1051	12	-	3.88e-09	57591	MKL1	intron
chr22	40967885	40967944	Peak_1052	9	-	3.88e-09	57591	MKL1	intron
chr22	41725266	41725326	Peak_1040	11	+	1.00e-100	23264	ZC3H7B	intron
chr22	42229765	42229800	Peak_1041	7	+	3.79e-07	6721	SREBF2	intron
chr22	42235969	42236032	Peak_1042	9	+	1.00e-100	6721	SREBF2	intron
chr22	45627072	45627121	Peak_1055	5	-	3.05e-04	23313	KIAA0930	intron
chr22	46503591	46503611	Peak_1043	8	+	4.51e-04	400931	MIRLET7BHG	intron
chr22	48990700	48990785	Peak_1044	6	+	1.86e-02	25817	FAM19A5	intron
chr22	50669169	50669205	Peak_1056	4	-	5.00e-02	85378	TUBGCP6	intron
chr3	4336266	4336327	Peak_1104	5	-	2.47e-07	285362	SUMF1	intron
chr3	4677579	4677642	Peak_1057	7	+	1.00e-100	3708	ITPR1	intron
chr3	8956766	8956844	Peak_1105	7	-	1.00e-100	56852	RAD18	intron
chr3	12686529	12686611	Peak_1106	10	-	1.00e-100	5894	RAF1	intron
chr3	17648325	17648393	Peak_1107	4	-	2.54e-03	9779	TBC1D5	intron
chr3	20214240	20214296	Peak_1108	7	-	3.37e-07	151648	SGOL1	intron
chr3	23279406	23279469	Peak_1060	3	+	1.68e-02	7325	UBE2E2	intron
chr3	31825275	31825305	Peak_1109	9	-	1.00e-100	114884	OSBPL10	intron
chr3	33634166	33634199	Peak_1111	4	-	1.79e-02	23122	CLASP2	intron
chr3	42254560	42254611	Peak_1064	8	+	2.31e-09	22906	TRAK1	intron
chr3	42615767	42615866	Peak_1112	8	-	1.00e-100	9117	SEC22C	intron
chr3	45775613	45775672	Peak_1065	6	+	7.29e-06	22908	SACM1L	intron
chr3	45777358	45777424	Peak_1066	5	+	1.68e-03	22908	SACM1L	intron
chr3	47948116	47948180	Peak_1116	5	-	5.29e-03	4134	MAP4	intron
chr3	48029610	48029696	Peak_1117	8	-	1.00e-100	4134	MAP4	intron
chr3	48034350	48034406	Peak_1118	5	-	5.29e-03	4134	MAP4	intron
chr3	49886977	49887065	Peak_1121	4	-	1.22e-02	10293	TRAIP	intron
chr3	50007207	50007234	Peak_1067	6	+	2.54e-05	10180	RBM6	intron
chr3	50075261	50075334	Peak_1068	5	+	5.67e-03	10180	RBM6	intron
chr3	52168778	52168826	Peak_1122	9	-	1.00e-100	25886	POC1A	intron
chr3	52605817	52605881	Peak_1123	4	-	4.31e-02	55193	PBRM1	intron
chr3	52664439	52664513	Peak_1124	4	-	4.31e-02	55193	PBRM1	intron
chr3	52725399	52725459	Peak_1069	6	+	1.90e-02	26354	GNL3	intron
chr3	57170658	57170689	Peak_1125	4	-	2.13e-04	54756	IL17RD	intron
chr3	58224098	58224121	Peak_1071	6	+	4.89e-02	57406	ABHD6	intron
chr3	61577655	61577707	Peak_1073	6	+	1.00e-100	5793	PTPRG	intron
chr3	61872589	61872643	Peak_1074	7	+	1.00e-100	5793	PTPRG	intron
chr3	69082341	69082436	Peak_1126	7	-	2.84e-08	7110	TMF1	intron
chr3	77175943	77175982	Peak_1075	11	+	1.00e-100	6092	ROBO2	intron
chr3	77248775	77248837	Peak_1076	8	+	1.00e-100	6092	ROBO2	intron
chr3	89185491	89185521	Peak_1077	6	+	6.41e-09	2042	EPHA3	intron
chr3	99793544	99793603	Peak_1079	9	+	1.00e-100	84319	C3orf26	intron
chr3	105473322	105473388	Peak_1129	5	-	1.87e-06	868	CBLB	intron
chr3	115967308	115967363	Peak_1130	5	-	1.26e-05	4045	LSAMP	intron
chr3	115985680	115985742	Peak_1131	5	-	1.26e-05	4045	LSAMP	intron
chr3	124965131	124965199	Peak_1133	4	-	2.86e-03	7707	ZNF148	intron
chr3	124965131	124965199	Peak_1134	4	-	2.99e-02	84561	SLC12A8	intron
chr3	128036814	128036852	Peak_1083	4	+	2.72e-03	60678	EEFSEC	intron
chr3	129474874	129474953	Peak_1135	7	-	1.00e-100	23023	TMCC1	intron
chr3	130734567	130734648	Peak_1086	4	+	7.81e-03	27032	ATP2C1	intron
chr3	132320071	132320147	Peak_1136	4	-	2.49e-05	100532724	NPHP3-ACAD11	intron
chr3	132320071	132320147	Peak_1137	4	-	1.04e-04	100532724	NPHP3-ACAD11	intron
chr3	136420939	136420983	Peak_1139	28	-	1.00e-100	10274	STAG1	intron
chr3	136432382	136432433	Peak_1140	6	-	1.07e-06	10274	STAG1	intron
chr3	136546683	136546742	Peak_1087	7	+	3.91e-08	80723	SLC35G2	intron
chr3	136586767	136586838	Peak_1088	8	+	1.00e-100	4690	NCK1	intron
chr3	148796584	148796657	Peak_1141	4	-	2.37e-02	6596	HLTF	intron
chr3	149370365	149370431	Peak_1143	5	-	2.99e-04	25937	WWTR1	intron
chr3	159494694	159494767	Peak_1091	3	+	1.89e-03	100505385	IQCJ-SCHIP1	intron
chr3	159494694	159494767	Peak_1092	3	+	3.33e-03	100505385	IQCJ-SCHIP1	intron
chr3	160138727	160138815	Peak_1093	6	+	2.28e-04	10051	SMC4	intron
chr3	167426037	167426068	Peak_1146	5	-	3.19e-06	11235	PDCD10	intron
chr3	169847456	169847490	Peak_1147	7	-	3.71e-08	80012	PHC3	intron
chr3	176897918	176898039	Peak_1148	5	-	4.05e-02	79718	TBL1XR1	intron
chr3	176905149	176905191	Peak_1149	5	-	4.05e-02	79718	TBL1XR1	intron
chr3	179447270	179447366	Peak_1094	6	+	9.33e-09	8975	USP13	intron
chr3	183478109	183478169	Peak_1095	7	+	5.90e-09	55689	YEATS2	intron
chr3	185449687	185449778	Peak_1150	5	-	1.04e-03	10644	IGF2BP2	intron
chr3	185515611	185515695	Peak_1151	8	-	3.11e-09	10644	IGF2BP2	intron
chr3	190280509	190280545	Peak_1099	6	+	4.91e-05	3556	IL1RAP	intron
chr3	196977358	196977447	Peak_1154	7	-	1.00e-100	1739	DLG1	intron
chr4	2418345	2418375	Peak_1191	5	-	6.27e-03	57732	ZFYVE28	intron
chr4	3357789	3357849	Peak_1160	7	+	1.76e-08	6002	RGS12	intron
chr4	4455522	4455556	Peak_1192	5	-	3.00e-06	53407	STX18	intron
chr4	7865721	7865740	Peak_1193	9	-	1.00e-100	60312	AFAP1	intron
chr4	7934671	7934758	Peak_1194	9	-	1.00e-100	60312	AFAP1	intron
chr4	15543164	15543221	Peak_1162	6	+	4.51e-09	57545	CC2D2A	intron
chr4	16697026	16697088	Peak_1195	4	-	4.85e-03	9079	LDB2	intron
chr4	21042840	21042882	Peak_1197	4	-	2.40e-06	80333	KCNIP4	intron
chr4	21530398	21530418	Peak_1198	4	-	2.40e-06	80333	KCNIP4	intron
chr4	24549438	24549499	Peak_1200	5	-	2.11e-05	1665	DHX15	intron
chr4	26727771	26727818	Peak_1164	6	+	2.94e-09	55296	TBC1D19	intron
chr4	30780632	30780665	Peak_1165	7	+	5.84e-08	5099	PCDH7	intron
chr4	37685920	37685982	Peak_1201	5	-	1.40e-03	768211	RELL1	intron
chr4	39732439	39732548	Peak_1167	6	+	3.62e-05	3093	UBE2K	intron
chr4	39862670	39862700	Peak_1202	5	-	7.62e-05	23244	PDS5A	intron
chr4	41942079	41942148	Peak_1168	7	+	4.84e-03	55161	TMEM33	intron
chr4	48779034	48779068	Peak_1203	4	-	3.69e-03	285527	FRYL	intron
chr4	54007791	54007821	Peak_1204	6	-	1.00e-100	152579	SCFD2	intron
chr4	56270777	56270838	Peak_1171	10	+	1.00e-100	55858	TMEM165	intron
chr4	109752815	109752864	Peak_1208	6	-	8.43e-09	84570	COL25A1	intron
chr4	110071177	110071223	Peak_1209	4	-	1.65e-03	84570	COL25A1	intron
chr4	110200455	110200475	Peak_1210	4	-	1.65e-03	84570	COL25A1	intron
chr4	114185998	114186046	Peak_1178	4	+	9.74e-03	287	ANK2	intron
chr4	115938110	115938171	Peak_1212	6	-	4.41e-08	64579	NDST4	intron
chr4	122301287	122301363	Peak_1213	5	-	1.53e-05	84109	QRFPR	intron
chr4	123856630	123856700	Peak_1180	7	+	1.00e-100	166378	SPATA5	intron
chr4	128883763	128883837	Peak_1214	5	-	7.48e-05	256471	MFSD8	intron
chr4	148668947	148668981	Peak_1182	5	+	1.24e-05	79658	ARHGAP10	intron
chr4	148890480	148890526	Peak_1183	11	+	5.83e-09	79658	ARHGAP10	intron
chr4	153702397	153702450	Peak_1184	4	+	3.88e-03	27236	ARFIP1	intron
chr4	154420588	154420639	Peak_1185	9	+	2.92e-09	23240	KIAA0922	intron
chr4	155262470	155262530	Peak_1216	10	-	1.00e-100	54798	DCHS2	intron
chr4	165234444	165234516	Peak_1218	5	-	4.98e-05	55016	MARCH1	intron
chr4	169821022	169821080	Peak_1219	4	-	2.83e-03	84869	CBR4	intron
chr4	174131757	174131807	Peak_1187	6	+	1.49e-06	51809	GALNT7	intron
chr4	185599686	185599745	Peak_1189	9	+	1.00e-100	201973	CCDC111	intron
chr4	189516725	189516796	Peak_1190	5	+	6.01e-05	401164	LOC401164	intron
chr5	375492	375564	Peak_1221	4	+	3.69e-03	57491	AHRR	intron
chr5	21469080	21469144	Peak_1224	6	+	1.00e-100	728411	GUSBP1	intron
chr5	37345957	37346020	Peak_1263	10	-	1.36e-09	9631	NUP155	intron
chr5	53372165	53372261	Peak_1265	4	-	5.86e-04	54622	ARL15	intron
chr5	56473497	56473527	Peak_1226	6	+	6.99e-08	65056	GPBP1	intron
chr5	59277344	59277423	Peak_1266	3	-	1.90e-03	5144	PDE4D	intron
chr5	61852658	61852694	Peak_1227	4	+	8.88e-04	51194	IPO11	intron
chr5	68397109	68397177	Peak_1230	8	+	1.00e-100	64924	SLC30A5	intron
chr5	68611784	68611825	Peak_1267	4	-	3.93e-03	202243	CCDC125	intron
chr5	78241353	78241388	Peak_1269	4	-	4.70e-04	411	ARSB	intron
chr5	93018852	93018877	Peak_1272	18	-	1.00e-100	83989	FAM172A	intron
chr5	93052363	93052406	Peak_1273	4	-	1.74e-02	83989	FAM172A	intron
chr5	94396598	94396656	Peak_1274	6	-	1.00e-100	79772	MCTP1	intron
chr5	98259881	98259977	Peak_1275	6	-	1.14e-06	1105	CHD1	intron
chr5	109072804	109072872	Peak_1236	9	+	3.05e-09	4124	MAN2A1	intron
chr5	122125126	122125188	Peak_1238	4	+	1.61e-03	6643	SNX2	intron
chr5	127627974	127628052	Peak_1280	6	-	1.10e-12	2201	FBN2	intron
chr5	137495028	137495058	Peak_1283	4	-	4.54e-03	10902	BRD8	intron
chr5	137663569	137663637	Peak_1284	4	-	6.87e-03	995	CDC25C	intron
chr5	138481288	138481346	Peak_1286	5	-	1.80e-06	64374	SIL1	intron
chr5	138613931	138613964	Peak_1241	6	+	4.33e-03	724102	SNHG4	intron
chr5	138997568	138997631	Peak_1242	4	+	2.90e-02	7322	UBE2D2	intron
chr5	139660637	139660688	Peak_1287	4	-	2.18e-02	5201	PFDN1	intron
chr5	145444550	145444602	Peak_1246	4	+	1.41e-03	153769	SH3RF2	intron
chr5	159524304	159524358	Peak_1293	10	-	1.00e-100	114825	PWWP2A	intron
chr5	167028942	167029020	Peak_1250	4	+	1.16e-02	57451	ODZ2	intron
chr5	167784478	167784536	Peak_1251	5	+	6.57e-07	23286	WWC1	intron
chr5	167938879	167938935	Peak_1252	6	+	2.26e-06	5917	RARS	intron
chr5	169809986	169810050	Peak_1253	4	+	1.13e-04	30820	KCNIP1	intron
chr5	176359782	176359868	Peak_1295	9	-	1.00e-100	51720	UIMC1	intron
chr5	176374736	176374830	Peak_1296	9	-	1.00e-100	51720	UIMC1	intron
chr6	4888120	4888189	Peak_1298	5	+	2.55e-05	9425	CDYL	intron
chr6	7109200	7109209	Peak_1300	5	+	1.41e-03	6239	RREB1	intron
chr6	12025542	12025607	Peak_1301	6	+	1.83e-08	3096	HIVEP1	intron
chr6	13668023	13668105	Peak_1339	5	-	1.96e-04	10048	RANBP9	intron
chr6	13938250	13938297	Peak_1302	6	+	1.24e-06	221687	RNF182	intron
chr6	15248891	15248898	Peak_1303	6	+	2.98e-07	3720	JARID2	intron
chr6	17699675	17699719	Peak_1340	5	-	1.97e-03	9972	NUP153	intron
chr6	20403650	20403673	Peak_1304	5	+	8.51e-03	1871	E2F3	intron
chr6	20656634	20656675	Peak_1305	4	+	3.24e-03	54901	CDKAL1	intron
chr6	21091027	21091096	Peak_1306	4	+	3.24e-03	54901	CDKAL1	intron
chr6	22120599	22120652	Peak_1307	3	+	1.45e-02	401237	LINC00340	intron
chr6	25341009	25341039	Peak_1308	5	+	1.10e-12	55604	LRRC16A	intron
chr6	27433882	27433938	Peak_1341	7	-	1.57e-08	7738	ZNF184	intron
chr6	35319648	35319703	Peak_1310	8	+	1.47e-09	5467	PPARD	intron
chr6	35843831	35843878	Peak_1344	7	-	3.20e-07	6732	SRPK1	intron
chr6	39662080	39662147	Peak_1347	3	-	4.56e-02	221458	KIF6	intron
chr6	42230199	42230269	Peak_1348	5	-	1.39e-06	55809	TRERF1	intron
chr6	42621355	42621416	Peak_1311	10	+	2.22e-09	23304	UBR2	intron
chr6	43538020	43538064	Peak_1349	5	-	1.15e-03	57510	XPO5	intron
chr6	46702147	46702217	Peak_1350	7	-	1.61e-09	7941	PLA2G7	intron
chr6	64283054	64283082	Peak_1313	4	+	3.73e-02	7803	PTP4A1	intron
chr6	76200354	76200418	Peak_1354	3	-	1.38e-02	27145	FILIP1	intron
chr6	80207635	80207681	Peak_1355	8	-	1.00e-100	167691	LCA5	intron
chr6	84876802	84876881	Peak_1356	4	-	5.68e-03	22832	KIAA1009	intron
chr6	97636813	97636848	Peak_1357	4	-	2.44e-02	253714	MMS22L	intron
chr6	102234140	102234203	Peak_1318	5	+	4.92e-05	2898	GRIK2	intron
chr6	102359942	102360029	Peak_1319	4	+	3.03e-02	2898	GRIK2	intron
chr6	102382903	102382952	Peak_1320	4	+	3.03e-02	2898	GRIK2	intron
chr6	102407663	102407731	Peak_1321	4	+	3.03e-02	2898	GRIK2	intron
chr6	105409283	105409342	Peak_1322	11	+	1.00e-100	389421	LIN28B	intron
chr6	106701451	106701509	Peak_1358	4	-	1.59e-02	9474	ATG5	intron
chr6	107639464	107639528	Peak_1359	4	-	3.48e-03	57107	PDSS2	intron
chr6	107693650	107693691	Peak_1360	4	-	3.48e-03	57107	PDSS2	intron
chr6	110490074	110490115	Peak_1361	4	-	2.36e-02	8936	WASF1	intron
chr6	117055884	117055927	Peak_1323	5	+	8.12e-05	3841	KPNA5	intron
chr6	118006549	118006609	Peak_1324	6	+	8.46e-07	116150	NUS1	intron
chr6	123700202	123700268	Peak_1363	3	-	3.92e-02	10345	TRDN	intron
chr6	128711362	128711428	Peak_1364	4	-	1.81e-03	5796	PTPRK	intron
chr6	131327768	131327817	Peak_1366	11	-	3.84e-09	2037	EPB41L2	intron
chr6	131491103	131491150	Peak_1325	4	+	1.39e-02	9465	AKAP7	intron
chr6	133117553	133117680	Peak_1367	5	-	2.28e-03	116843	SLC18B1	intron
chr6	148742302	148742387	Peak_1330	4	+	2.37e-03	23328	SASH1	intron
chr6	149852636	149852678	Peak_1368	4	-	2.42e-02	85313	PPIL4	intron
chr6	157866137	157866220	Peak_1332	4	+	1.13e-04	79683	ZDHHC14	intron
chr6	167020741	167020772	Peak_1369	4	-	1.33e-04	6196	RPS6KA2	intron
chr6	168231621	168231676	Peak_1334	7	+	2.48e-09	4301	MLLT4	intron
chr7	926754	926803	Peak_1370	5	+	6.96e-03	51608	GET4	intron
chr7	18564477	18564525	Peak_1372	5	+	1.87e-07	9734	HDAC9	intron
chr7	37975604	37975676	Peak_1377	4	+	3.54e-03	54749	EPDR1	intron
chr7	44872504	44872551	Peak_1418	6	-	4.58e-03	94239	H2AFV	intron
chr7	48672369	48672399	Peak_1378	22	+	8.15e-09	154664	ABCA13	intron
chr7	65374142	65374204	Peak_1379	10	+	1.00e-100	154807	VKORC1L1	intron
chr7	66497883	66497995	Peak_1380	9	+	1.00e-100	55253	TYW1	intron
chr7	69961298	69961339	Peak_1381	3	+	1.04e-02	26053	AUTS2	intron
chr7	71263086	71263145	Peak_1420	4	-	3.89e-07	83698	CALN1	intron
chr7	72389749	72389807	Peak_1382	4	+	4.37e-02	9883	POM121	intron
chr7	72442350	72442410	Peak_1421	7	-	1.29e-09	442578	STAG3L3	intron
chr7	75544594	75544645	Peak_1383	5	+	9.56e-05	5447	POR	intron
chr7	76639959	76640036	Peak_1384	6	+	4.74e-08	441263	DTX2P1-UPK3BP1-PMS2P11	intron
chr7	87366213	87366246	Peak_1385	4	+	1.22e-04	154661	RUNDC3B	intron
chr7	90386919	90386974	Peak_1387	4	+	4.71e-02	5218	CDK14	intron
chr7	91490730	91490786	Peak_1423	4	-	2.13e-03	7978	MTERF	intron
chr7	99014639	99014717	Peak_1389	7	+	2.91e-06	8896	BUD31	intron
chr7	99654096	99654151	Peak_1390	7	+	6.01e-08	7589	ZSCAN21	intron
chr7	99770259	99770332	Peak_1424	5	-	2.97e-02	221914	GPC2	intron
chr7	101594815	101594881	Peak_1391	8	+	1.00e-100	1523	CUX1	intron
chr7	101642507	101642565	Peak_1392	7	+	8.02e-09	1523	CUX1	intron
chr7	102530565	102530630	Peak_1426	3	-	7.96e-03	222235	FBXL13	intron
chr7	104940655	104940715	Peak_1427	7	-	1.95e-08	6733	SRPK2	intron
chr7	104981772	104981822	Peak_1428	5	-	1.88e-03	6733	SRPK2	intron
chr7	107410640	107410698	Peak_1429	30	-	1.00e-100	1811	SLC26A3	intron
chr7	110916679	110916709	Peak_1430	8	-	1.54e-08	83943	IMMP2L	intron
chr7	111802563	111802604	Peak_1431	5	-	6.66e-07	9732	DOCK4	intron
chr7	127399117	127399179	Peak_1404	5	+	1.45e-05	27044	SND1	intron
chr7	128975921	128975983	Peak_1405	5	+	1.58e-05	23382	AHCYL2	intron
chr7	130593036	130593121	Peak_1433	6	-	1.11e-04	646329	LOC646329	intron
chr7	130702859	130702923	Peak_1434	4	-	4.29e-02	378805	FLJ43663	intron
chr7	132602568	132602633	Peak_1435	8	-	1.00e-100	54927	CHCHD3	intron
chr7	132648647	132648710	Peak_1436	5	-	7.93e-05	54927	CHCHD3	intron
chr7	133295749	133295815	Peak_1406	4	+	3.14e-04	60412	EXOC4	intron
chr7	133583848	133583888	Peak_1407	4	+	3.14e-04	60412	EXOC4	intron
chr7	135139972	135140033	Peak_1437	6	-	3.76e-07	4850	CNOT4	intron
chr7	149296955	149297006	Peak_1444	7	-	1.00e-100	79970	ZNF767	intron
chr7	149530464	149530542	Peak_1411	8	+	1.00e-100	23145	SSPO	intron
chr7	152482542	152482621	Peak_1412	4	+	1.18e-03	57180	ACTR3B	intron
chr8	6683777	6683845	Peak_1482	5	-	4.09e-04	389610	XKR5	intron
chr8	8668883	8668957	Peak_1483	6	-	1.68e-08	9258	MFHAS1	intron
chr8	10278892	10278959	Peak_1447	4	+	1.23e-02	4482	MSRA	intron
chr8	15556360	15556432	Peak_1450	4	+	1.68e-02	7991	TUSC3	intron
chr8	16961098	16961161	Peak_1451	4	+	3.24e-03	286097	EFHA2	intron
chr8	22755897	22755922	Peak_1486	11	-	1.00e-100	157310	PEBP4	intron
chr8	26368606	26368676	Peak_1487	6	-	3.14e-04	10687	PNMA2	intron
chr8	31510419	31510459	Peak_1461	3	+	3.51e-02	3084	NRG1	intron
chr8	33304888	33304981	Peak_1490	5	-	4.74e-05	84750	FUT10	intron
chr8	35232593	35232661	Peak_1462	4	+	1.51e-03	137970	UNC5D	intron
chr8	37668996	37669057	Peak_1463	8	+	1.00e-100	25960	GPR124	intron
chr8	38663968	38664020	Peak_1464	5	+	2.24e-04	6867	TACC1	intron
chr8	42362492	42362548	Peak_1491	4	-	3.64e-02	6575	SLC20A2	intron
chr8	48736994	48737040	Peak_1492	11	-	3.20e-09	5591	PRKDC	intron
chr8	48921831	48921869	Peak_1467	17	+	1.00e-100	7336	UBE2V2	intron
chr8	48928463	48928554	Peak_1468	8	+	2.74e-09	7336	UBE2V2	intron
chr8	54743085	54743125	Peak_1493	4	-	2.68e-04	51606	ATP6V1H	intron
chr8	56798809	56798878	Peak_1469	4	+	7.06e-03	4067	LYN	intron
chr8	61431259	61431330	Peak_1471	4	+	4.57e-02	5862	RAB2A	intron
chr8	66595377	66595440	Peak_1474	5	+	1.19e-05	9650	MTFR1	intron
chr8	67836833	67836876	Peak_1496	17	-	6.14e-11	641638	SNHG6	intron
chr8	74708268	74708304	Peak_1497	8	-	3.38e-09	55284	UBE2W	intron
chr8	85566106	85566176	Peak_1475	3	+	2.71e-02	138046	RALYL	intron
chr8	107742128	107742189	Peak_1478	3	+	4.45e-02	55074	OXR1	intron
chr8	109232320	109232388	Peak_1507	5	-	2.25e-04	3646	EIF3E	intron
chr8	113854503	113854504	Peak_1508	4	-	1.51e-03	114788	CSMD3	intron
chr8	119019490	119019542	Peak_1509	8	-	1.07e-08	2131	EXT1	intron
chr8	125362687	125362726	Peak_1511	4	-	1.19e-02	157378	TMEM65	intron
chr8	130988900	130988975	Peak_1512	4	-	3.01e-02	51571	FAM49B	intron
chr8	131072294	131072335	Peak_1513	14	-	6.71e-09	50807	ASAP1	intron
chr8	131083246	131083249	Peak_1514	6	-	2.50e-04	50807	ASAP1	intron
chr8	131433083	131433147	Peak_1515	10	-	6.71e-09	50807	ASAP1	intron
chr8	131455350	131455356	Peak_1516	6	-	2.50e-04	50807	ASAP1	intron
chr8	140777587	140777648	Peak_1517	4	-	3.94e-02	83696	TRAPPC9	intron
chr8	141634579	141634626	Peak_1518	7	-	2.40e-05	27161	EIF2C2	intron
chr8	141998785	141998845	Peak_1519	8	-	1.00e-100	5747	PTK2	intron
chr8	144613074	144613138	Peak_1520	7	-	2.44e-03	23144	ZC3H3	intron
chr8	144676575	144676577	Peak_1521	17	-	6.13e-10	1936	EEF1D	intron
chr8	145018220	145018256	Peak_1522	8	-	4.86e-02	5339	PLEC	intron
chr8	145020596	145020627	Peak_1523	10	-	5.25e-05	5339	PLEC	intron
chr8	145826639	145826691	Peak_1524	5	-	1.87e-02	80728	ARHGAP39	intron
chr9	3273800	3273874	Peak_1557	6	-	1.03e-08	5991	RFX3	intron
chr9	5008404	5008502	Peak_1525	3	+	2.67e-02	3717	JAK2	intron
chr9	15934389	15934473	Peak_1526	5	+	1.46e-04	203238	CCDC171	intron
chr9	17164837	17164922	Peak_1527	7	+	1.00e-100	54875	CNTLN	intron
chr9	17311458	17311492	Peak_1528	4	+	1.37e-03	54875	CNTLN	intron
chr9	33353423	33353485	Peak_1529	4	+	3.11e-02	4799	NFX1	intron
chr9	34029466	34029532	Peak_1559	7	-	9.46e-07	55833	UBAP2	intron
chr9	34031223	34031285	Peak_1560	6	-	1.76e-04	55833	UBAP2	intron
chr9	34042419	34042484	Peak_1561	5	-	2.73e-02	55833	UBAP2	intron
chr9	45442427	45442505	Peak_1530	3	+	1.88e-04			intron
chr9	78655248	78655319	Peak_1531	11	+	1.00e-100	5125	PCSK5	intron
chr9	80379986	80380036	Peak_1566	4	-	1.16e-02	2776	GNAQ	intron
chr9	88249065	88249126	Peak_1567	9	-	1.00e-100	23287	AGTPBP1	intron
chr9	88625497	88625549	Peak_1532	8	+	1.00e-100	60560	NAA35	intron
chr9	90113158	90113203	Peak_1533	5	+	5.34e-03	1612	DAPK1	intron
chr9	90307886	90307947	Peak_1534	8	+	3.61e-09	1612	DAPK1	intron
chr9	94629918	94629983	Peak_1569	4	-	2.90e-03	4920	ROR2	intron
chr9	95026598	95026628	Peak_1571	9	-	1.00e-100	3376	IARS	intron
chr9	95299159	95299220	Peak_1535	5	+	9.97e-05	401541	CENPP	intron
chr9	95307003	95307066	Peak_1536	12	+	4.96e-09	401541	CENPP	intron
chr9	96343839	96343904	Peak_1537	4	+	1.98e-02	5253	PHF2	intron
chr9	97026434	97026464	Peak_1538	4	+	1.32e-03	169841	ZNF169	intron
chr9	108295713	108295780	Peak_1540	4	+	1.00e-03	83856	FSD1L	intron
chr9	109654959	109655035	Peak_1542	4	+	1.71e-02	58499	ZNF462	intron
chr9	114691342	114691419	Peak_1545	4	+	1.16e-02	7357	UGCG	intron
chr9	114925629	114925667	Peak_1575	4	-	2.24e-02	100422990	MIR3134	intron
chr9	114925629	114925667	Peak_1578	4	-	7.25e-04	64420	SUSD1	intron
chr9	114966869	114966935	Peak_1576	4	-	2.24e-02	100422990	MIR3134	intron
chr9	115299398	115299460	Peak_1546	6	+	1.40e-07	158405	KIAA1958	intron
chr9	126503152	126503209	Peak_1580	5	-	3.96e-07	57706	DENND1A	intron
chr9	127442357	127442423	Peak_1581	4	-	1.41e-03	2649	NR6A1	intron
chr9	128456550	128456615	Peak_1582	5	-	1.36e-06	79109	MAPKAP1	intron
chr9	131596488	131596541	Peak_1584	4	-	4.73e-03	883	CCBL1	intron
chr9	132672703	132672767	Peak_1585	8	-	1.00e-100	23048	FNBP1	intron
chr9	132699969	132700016	Peak_1586	5	-	1.53e-02	23048	FNBP1	intron
chr9	133599186	133599258	Peak_1552	4	+	2.70e-02	25	ABL1	intron
chr9	139246577	139246586	Peak_1554	8	+	4.65e-05	26086	GPSM1	intron
chr9	140522160	140522228	Peak_1555	5	+	1.34e-02	79813	EHMT1	intron
chr9	140714058	140714069	Peak_1556	6	+	6.73e-05	79813	EHMT1	intron
chrX	3581627	3581683	Peak_1614	9	-	1.00e-100	5613	PRKX	intron
chrX	6144168	6144220	Peak_1615	4	-	1.31e-02	57502	NLGN4X	intron
chrX	11213448	11213483	Peak_1617	4	-	1.84e-06	395	ARHGAP6	intron
chrX	18917645	18917717	Peak_1618	4	-	3.61e-03	5256	PHKA2	intron
chrX	24174780	24174900	Peak_1592	4	+	2.99e-02	7543	ZFX	intron
chrX	24826791	24826855	Peak_1593	4	+	1.62e-02	5422	POLA1	intron
chrX	39969911	39969963	Peak_1620	19	-	2.16e-09	54880	BCOR	intron
chrX	40984919	40984979	Peak_1596	4	+	3.57e-03	8239	USP9X	intron
chrX	46441040	46441115	Peak_1597	4	+	7.29e-03	56548	CHST7	intron
chrX	70278582	70278604	Peak_1624	4	-	4.76e-03	29934	SNX12	intron
chrX	73165761	73165853	Peak_1605	8	+	1.00e-100	554203	JPX	intron
chrX	73463718	73463731	Peak_1626	4	-	3.44e-02	100302692	FTX	intron
chrX	76966409	76966452	Peak_1627	4	-	5.40e-03	546	ATRX	intron
chrX	95942448	95942499	Peak_1607	4	+	1.86e-04	1730	DIAPH2	intron
chrX	100392979	100393043	Peak_1608	6	+	1.28e-06	2491	CENPI	intron
chrX	114876358	114876428	Peak_1609	8	+	1.54e-09	5358	PLS3	intron
chrX	117187770	117187838	Peak_1631	6	-	1.00e-100	90293	KLHL13	intron
chrX	129970412	129970445	Peak_1634	4	-	1.97e-04	10495	ENOX2	intron
chrX	138110747	138110792	Peak_1635	8	-	1.00e-100	2258	FGF13	intron
chrX	138738445	138738526	Peak_1636	3	-	3.41e-02	4168	MCF2	intron
chrX	153245194	153245256	Peak_1612	6	+	2.88e-05	8269	TMEM187	intron
chrX	153738831	153738880	Peak_1637	11	-	1.92e-10	60343	FAM3A	intron
chrX	154308833	154308908	Peak_1613	4	+	2.03e-02	79184	BRCC3	intron

## Sheet: CITS scr
chr	start	end	CITS id	#supporting tags	strand	pval	gene id	gene symbol	region
chr1	1243031	1243052	CITS_12	4	-	7.48e-05	116983	ACAP3	intron
chr1	2240124	2240145	CITS_1	4	+	4.70e-05	6497	SKI	3'UTR
chr1	26227420	26227441	CITS_13	6	-	2.07e-05	3925	STMN1	3'UTR
chr1	52253809	52253830	CITS_2	9	+	9.50e-06	114883	OSBPL9	3'UTR
chr1	60340013	60340034	CITS_3	5	+	4.79e-04	51361	HOOK1	3'UTR
chr1	65326661	65326682	CITS_14	5	-	1.50e-05	3716	JAK1	intron
chr1	84649738	84649759	CITS_4	4	+	9.01e-05	5567	PRKACB	CDS
chr1	89290001	89290022	CITS_5	4	+	1.63e-04	5586	PKN2	CDS
chr1	93618264	93618285	CITS_15	4	-	1.17e-05	50999	TMED5	3'UTR
chr1	109642943	109642964	CITS_6	5	+	7.29e-05	677766	SCARNA2	exon_unclassified
chr1	111143233	111143254	CITS_16	5	-	5.03e-04	3737	KCNA2	intron
chr1	111143235	111143256	CITS_17	6	-	1.26e-05	3737	KCNA2	intron
chr1	111144481	111144502	CITS_18	4	-	1.57e-04	3737	KCNA2	intron
chr1	113213289	113213310	CITS_7	4	+	3.81e-04	829	CAPZA1	3'UTR
chr1	115260742	115260763	CITS_19	5	-	2.93e-06	7812	CSDE1	3'UTR
chr1	116916658	116916679	CITS_8	6	+	1.08e-06	476	ATP1A1	5'UTR
chr1	116947216	116947237	CITS_9	6	+	2.66e-06	476	ATP1A1	3'UTR
chr1	152005037	152005058	CITS_20	3	-	5.25e-04	6282	S100A11	3'UTR
chr1	153779860	153779881	CITS_21	4	-	2.75e-04	57459	GATAD2B	3'UTR
chr1	156712494	156712515	CITS_22	4	-	1.22e-05	3068	HDGF	3'UTR
chr1	168214875	168214896	CITS_10	5	+	4.99e-06	9095	TBX19	intron
chr1	173835843	173835864	CITS_23	4	-	1.06e-04	692196	SNORD76	exon_unclassified
chr1	184660023	184660044	CITS_24	4	-	9.86e-05	80267	EDEM3	3'UTR
chr1	231136059	231136080	CITS_11	4	+	8.09e-05	64801	ARV1	3'UTR
chr10	22611005	22611026	CITS_25	4	+	2.88e-05	100532731	COMMD3-BMI1	intron
chr10	70744538	70744559	CITS_26	4	+	5.51e-04	9188	DDX21	3'UTR
chr10	81273168	81273189	CITS_27	5	+	2.78e-06	143244	EIF5AL1	3'UTR
chr10	90974384	90974405	CITS_30	4	-	2.69e-04	3988	LIPA	3'UTR
chr10	96363156	96363177	CITS_28	4	+	6.49e-05	downstream_10k
chr10	115670516	115670537	CITS_29	4	+	2.30e-04	374354	NHLRC2	3'UTR
chr11	2412002	2412023	CITS_31	3	+	7.26e-04	975	CD81	intron
chr11	3161980	3162001	CITS_64	4	-	1.19e-04	114879	OSBPL5	intron
chr11	10530976	10530997	CITS_65	8	-	2.23e-04			downstream_10k||upstream_10k
chr11	10530988	10531009	CITS_66	11	-	6.43e-08			downstream_10k||upstream_10k
chr11	10530989	10531010	CITS_67	16	-	3.41e-14			downstream_10k||upstream_10k
chr11	10819246	10819267	CITS_68	6	-	3.30e-06	1982	EIF4G2	3'UTR
chr11	10823051	10823072	CITS_69	11	-	3.71e-14	1982	EIF4G2	exon_unclassified
chr11	12964417	12964438	CITS_32	4	+	2.31e-04	7003	TEAD1	3'UTR
chr11	32956869	32956890	CITS_33	6	+	3.11e-05	79832	QSER1	CDS
chr11	35828961	35828982	CITS_34	4	+	1.24e-04	54765	TRIM44	3'UTR
chr11	43365843	43365864	CITS_35	4	+	2.93e-04	8539	API5	3'UTR
chr11	46515744	46515765	CITS_70	4	-	7.79e-04	55626	AMBRA1	CDS
chr11	61567342	61567363	CITS_71	4	-	6.69e-05	3992	FADS1	3'UTR
chr11	61735074	61735095	CITS_72	5	-	5.50e-04	2495	FTH1	5'UTR
chr11	61735085	61735106	CITS_73	5	-	5.50e-04	2495	FTH1	5'UTR
chr11	62392876	62392897	CITS_74	5	-	1.02e-05	23193	GANAB	3'UTR
chr11	62432908	62432929	CITS_36	4	+	2.79e-04	751071	METTL12	exon_unclassified
chr11	62622829	62622850	CITS_75	16	-	9.10e-15	9302	SNORD26	exon_unclassified
chr11	65119371	65119392	CITS_37	4	+	1.33e-04	5977	DPF2	3'UTR
chr11	65190384	65190405	CITS_38	4	+	4.83e-05	283131	NEAT1	exon_unclassified
chr11	65192430	65192451	CITS_39	4	+	7.33e-04	283131	NEAT1	exon_unclassified
chr11	65267112	65267133	CITS_40	9	+	9.56e-08	378938	MALAT1	exon_unclassified
chr11	65267115	65267136	CITS_41	7	+	8.46e-05	378938	MALAT1	exon_unclassified
chr11	65267118	65267139	CITS_42	7	+	8.46e-05	378938	MALAT1	exon_unclassified
chr11	65268972	65268993	CITS_43	6	+	4.94e-05	378938	MALAT1	exon_unclassified
chr11	69466470	69466491	CITS_44	8	+	4.19e-08	595	CCND1	3'UTR
chr11	69466537	69466558	CITS_45	6	+	7.24e-05	595	CCND1	3'UTR
chr11	69467499	69467520	CITS_46	10	+	1.12e-06	595	CCND1	3'UTR
chr11	69467500	69467521	CITS_47	32	+	1.00e-100	595	CCND1	3'UTR
chr11	69467501	69467522	CITS_48	21	+	1.00e-100	595	CCND1	3'UTR
chr11	69467507	69467528	CITS_49	38	+	1.00e-100	595	CCND1	3'UTR
chr11	69467510	69467531	CITS_51	14	+	2.53e-12	595	CCND1	3'UTR
chr11	69467512	69467533	CITS_52	11	+	5.05e-08	595	CCND1	3'UTR
chr11	69467515	69467536	CITS_53	12	+	2.06e-09	595	CCND1	3'UTR
chr11	69467518	69467539	CITS_54	11	+	5.05e-08	595	CCND1	3'UTR
chr11	69467522	69467543	CITS_55	8	+	3.99e-04	595	CCND1	3'UTR
chr11	69467523	69467544	CITS_56	43	+	1.00e-100	595	CCND1	3'UTR
chr11	69467525	69467546	CITS_57	10	+	1.12e-06	595	CCND1	3'UTR
chr11	69467528	69467549	CITS_58	9	+	2.25e-05	595	CCND1	3'UTR
chr11	69467536	69467557	CITS_59	28	+	1.00e-100	595	CCND1	3'UTR
chr11	69467538	69467559	CITS_60	8	+	3.99e-04	595	CCND1	3'UTR
chr11	69467594	69467615	CITS_61	8	+	3.99e-04	595	CCND1	3'UTR
chr11	93465607	93465628	CITS_76	4	-	4.89e-04	654320	SNORA8	exon_unclassified
chr11	93466714	93466735	CITS_77	4	-	9.23e-05	79101	TAF1D	exon_unclassified
chr11	102268134	102268155	CITS_78	4	-	5.50e-05	114908	TMEM123	3'UTR
chr11	107835614	107835635	CITS_62	3	+	7.48e-04			downstream_10k
chr11	111609639	111609660	CITS_79	7	-	1.12e-05	5519	PPP2R1B	3'UTR
chr11	126133600	126133621	CITS_80	5	-	4.95e-05	6734	SRPR	3'UTR
chr11	126227858	126227879	CITS_63	4	+	8.05e-05	6484	ST3GAL4	intron
chr12	968483	968504	CITS_81	4	+	2.53e-05	65125	WNK1	CDS
chr12	6857244	6857265	CITS_92	4	-	1.27e-04	8079	MLF2	3'UTR
chr12	10375517	10375538	CITS_82	4	+	1.35e-04	23710	GABARAPL1	3'UTR
chr12	50157767	50157788	CITS_83	4	+	9.16e-05	7009	TMBIM6	3'UTR
chr12	50158329	50158350	CITS_84	8	+	2.18e-10	7009	TMBIM6	3'UTR
chr12	53873441	53873462	CITS_85	9	+	1.43e-09	5094	PCBP2	3'UTR
chr12	54625255	54625276	CITS_93	5	-	7.14e-05	100616400	MIR3198-2	3'UTR
chr12	54633860	54633881	CITS_94	6	-	1.71e-06	23468	CBX5	3'UTR
chr12	54634663	54634684	CITS_95	4	-	7.32e-05	23468	CBX5	3'UTR
chr12	56634056	56634077	CITS_96	4	-	1.07e-04	283373	ANKRD52	3'UTR
chr12	56665984	56666005	CITS_97	4	-	2.93e-04	1431	CS	3'UTR
chr12	57057932	57057953	CITS_98	4	-	8.91e-04	10728	PTGES3	3'UTR
chr12	66357487	66357508	CITS_87	4	+	0.000621	8091	HMGA2	3'UTR
chr12	66451452	66451473	CITS_99	11	-	1.80e-10			deep_intergenic
chr12	93803596	93803617	CITS_100	4	-	7.74e-05	7334	UBE2N	3'UTR
chr12	96661890	96661911	CITS_88	6	+	8.45e-08			downstream_10k
chr12	104743064	104743085	CITS_89	4	+	9.90e-04	7296	TXNRD1	3'UTR
chr12	109039507	109039528	CITS_101	3	-	8.59e-04	23603	CORO1C	3'UTR
chr12	112946039	112946060	CITS_90	4	+	9.43e-04	5781	PTPN11	3'UTR
chr12	121135220	121135241	CITS_91	4	+	4.99e-05	9761	MLEC	3'UTR
chr13	31034890	31034911	CITS_104	4	-	8.04e-04	3146	HMGB1	3'UTR
chr13	34410830	34410851	CITS_102	4	+	4.84e-05	5983	RFC3	3'UTR
chr13	39917767	39917788	CITS_105	8	-	4.00e-06	10186	LHFP	3'UTR
chr13	39917769	39917790	CITS_106	9	-	1.49e-07	10186	LHFP	3'UTR
chr13	39917770	39917791	CITS_107	7	-	9.40e-05	10186	LHFP	3'UTR
chr13	39917771	39917792	CITS_108	12	-	4.06e-12	10186	LHFP	3'UTR
chr13	39917775	39917796	CITS_109	8	-	4.00e-06	10186	LHFP	3'UTR
chr13	39917777	39917798	CITS_110	7	-	9.40e-05	10186	LHFP	3'UTR
chr13	46542140	46542161	CITS_111	4	-	5.32e-05	23091	ZC3H13	CDS||5'UTR
chr13	48835698	48835719	CITS_103	4	+	9.30e-04	9445	ITM2B	3'UTR
chr14	20811288	20811309	CITS_114	7	-	8.43e-06	85495	RPPH1	exon_unclassified
chr14	20811560	20811581	CITS_115	9	-	5.99e-10	85495	RPPH1	exon_unclassified
chr14	39502129	39502150	CITS_116	4	-	1.37e-04	10484	SEC23A	3'UTR
chr14	62932359	62932380	CITS_117	4	-	2.67e-05			deep_intergenic
chr14	75601048	75601069	CITS_118	4	-	3.99e-04	10972	TMED10	3'UTR
chr14	85999819	85999840	CITS_112	4	+	6.79e-05	23768	FLRT2	intron
chr14	95555748	95555769	CITS_119	4	-	6.20e-05	23405	DICER1	3'UTR
chr14	102549463	102549484	CITS_120	4	-	5.19e-04	3320	HSP90AA1	CDS
chr14	103193247	103193268	CITS_113	4	+	7.74e-05	23186	RCOR1	3'UTR
chr15	24276819	24276840	CITS_121	5	+	3.23e-04			deep_intergenic
chr15	42749348	42749369	CITS_127	4	-	6.49e-05	64397	ZFP106	CDS
chr15	45010144	45010165	CITS_122	12	+	1.11e-16	567	B2M	3'UTR
chr15	58887967	58887988	CITS_128	4	-	2.98e-04			downstream_10k
chr15	62144925	62144946	CITS_129	4	-	5.97e-05	54832	VPS13C	3'UTR
chr15	65869749	65869770	CITS_123	8	+	1.07e-07	51495	PTPLAD1	3'UTR
chr15	65869759	65869780	CITS_124	6	+	1.09e-04	51495	PTPLAD1	3'UTR
chr15	91043605	91043626	CITS_125	4	+	6.80e-04	8826	IQGAP1	3'UTR
chr15	96881337	96881358	CITS_126	4	+	3.19e-04	7026	NR2F2	3'UTR
chr16	1415141	1415162	CITS_135	4	-	3.80e-05	64718	UNKL	3'UTR
chr16	2172655	2172676	CITS_136	4	-	5.03e-05	5310	PKD1	intron
chr16	2205096	2205117	CITS_137	9	-	2.02e-11	26788	SNORD60	exon_unclassified
chr16	18803891	18803912	CITS_138	4	-	1.18e-04	23204	ARL6IP1	3'UTR
chr16	23585097	23585118	CITS_130	4	+	2.19e-04	56061	UBFD1	3'UTR
chr16	29821732	29821753	CITS_131	8	+	5.47e-11	4150	MAZ	3'UTR
chr16	33964906	33964927	CITS_132	4	+	3.42e-06			downstream_10k||upstream_10k
chr16	66648981	66649002	CITS_139	4	-	1.51e-04	146223	CMTM4	3'UTR
chr16	67133113	67133134	CITS_133	4	+	5.86e-05	865	CBFB	3'UTR
chr16	85644664	85644685	CITS_134	4	+	5.49e-05			upstream_10k
chr16	87866249	87866270	CITS_140	6	-	4.44e-06	8140	SLC7A5	3'UTR
chr17	1248046	1248067	CITS_145	6	-	1.72e-05	7531	YWHAE	3'UTR
chr17	1248626	1248647	CITS_146	5	-	9.03e-05	7531	YWHAE	3'UTR
chr17	7216046	7216067	CITS_147	4	-	5.86e-05	84461	NEURL4	3'UTR
chr17	30809062	30809083	CITS_141	4	+	3.44e-04			downstream_10k||upstream_10k
chr17	45760602	45760623	CITS_142	10	+	5.31e-10	3837	KPNB1	3'UTR
chr17	45760627	45760648	CITS_143	7	+	1.48e-05	3837	KPNB1	3'UTR
chr17	56081717	56081738	CITS_148	4	-	2.65e-04	6426	SRSF1	3'UTR
chr17	73314451	73314472	CITS_149	3	-	4.29e-04	2885	GRB2	3'UTR
chr17	74676452	74676473	CITS_150	4	-	5.83e-05	439921	MXRA7	3'UTR
chr17	79477180	79477201	CITS_151	5	-	3.94e-04	71	ACTG1	3'UTR
chr17	79478125	79478146	CITS_152	4	-	5.10e-04	71	ACTG1	CDS
chr17	79668807	79668828	CITS_144	5	+	2.11e-05	9146	HGS	3'UTR
chr17	79801707	79801728	CITS_153	5	-	1.25e-04	5034	P4HB	3'UTR
chr17	79884766	79884787	CITS_154	6	-	2.52e-07	4097	MAFG	intron
chr18	723104	723125	CITS_155	4	-	3.08e-04	7525	YES1	3'UTR
chr18	3499005	3499026	CITS_156	5	-	6.89e-06	9229	DLGAP1	3'UTR
chr18	47018089	47018110	CITS_157	5	-	4.18e-06	26790	SNORD58B	5'UTR
chr18	56997611	56997632	CITS_158	5	-	1.91e-06	3998	LMAN1	3'UTR
chr19	578390	578411	CITS_159	3	+	9.01e-04	682	BSG	intron
chr19	582824	582845	CITS_160	6	+	4.03e-04	682	BSG	3'UTR
chr19	582935	582956	CITS_161	6	+	4.03e-04	682	BSG	3'UTR
chr19	582936	582957	CITS_162	8	+	4.25e-07	682	BSG	3'UTR
chr19	582938	582959	CITS_163	8	+	4.25e-07	682	BSG	3'UTR
chr19	2198331	2198352	CITS_164	4	+	5.27e-04	84444	DOT1L	intron
chr19	3099644	3099665	CITS_165	3	+	9.63e-04	2767	GNA11	intron
chr19	3462958	3462979	CITS_166	4	+	8.53e-04	4782	NFIC	3'UTR
chr19	3976511	3976532	CITS_179	6	-	7.82e-05	1938	EEF2	3'UTR
chr19	3976527	3976548	CITS_180	6	-	7.82e-05	1938	EEF2	3'UTR
chr19	10427233	10427254	CITS_181	4	-	3.80e-05	125950	RAVER1	3'UTR
chr19	12841549	12841570	CITS_182	4	-	6.90e-04	79002	C19orf43	3'UTR
chr19	16187675	16187696	CITS_167	4	+	2.25e-04	7171	TPM4	intron
chr19	16213487	16213508	CITS_168	4	+	3.42e-04	7171	TPM4	3'UTR
chr19	17973445	17973466	CITS_169	7	+	2.44e-08	26780	SNORA68	exon_unclassified
chr19	18535047	18535068	CITS_170	4	+	2.74e-05	170463	SSBP4	intron
chr19	19617513	19617534	CITS_171	5	+	4.74e-06	54815	GATAD2A	3'UTR
chr19	34922751	34922772	CITS_172	4	+	1.56e-04	10054	UBA2	CDS||5'UTR
chr19	39220708	39220729	CITS_173	7	+	1.14e-05	81	ACTN4	3'UTR
chr19	39220712	39220733	CITS_174	8	+	4.26e-07	81	ACTN4	3'UTR
chr19	39220722	39220743	CITS_175	7	+	1.14e-05	81	ACTN4	3'UTR
chr19	41812572	41812593	CITS_176	4	+	7.19e-04	11100	HNRNPUL1	3'UTR
chr19	42758806	42758827	CITS_183	4	-	3.85e-04	2077	ERF	intron
chr19	47222861	47222882	CITS_184	4	-	3.69e-05	29888	STRN4	3'UTR
chr19	48886201	48886222	CITS_185	4	-	3.70e-04	10945	KDELR1	3'UTR
chr19	49469524	49469545	CITS_177	4	+	2.70e-04	2512	FTL	CDS||3'UTR
chr19	50426574	50426595	CITS_186	3	-	9.63e-04	23636	NUP62	intron
chr19	52729493	52729514	CITS_178	4	+	6.13e-04	5518	PPP2R1A	3'UTR
chr2	33141386	33141407	CITS_191	7	-	7.01e-05			deep_intergenic
chr2	61705216	61705237	CITS_192	5	-	2.37e-05	7514	XPO1	3'UTR
chr2	69473589	69473610	CITS_187	4	+	8.63e-04	84168	ANTXR1	3'UTR
chr2	72405393	72405414	CITS_193	4	-	6.92e-04			downstream_10k
chr2	122288443	122288464	CITS_188	6	+	2.90e-04	100151683	RNU4ATAC	exon_unclassified
chr2	122288444	122288465	CITS_189	19	+	1.55e-14	100151683	RNU4ATAC	exon_unclassified
chr2	133015254	133015275	CITS_194	20	-	1.00e-100	554226	ANKRD30BL	exon_unclassified
chr2	203426280	203426301	CITS_190	4	+	6.06e-05	659	BMPR2	3'UTR
chr2	216240078	216240099	CITS_195	4	-	5.10e-04	2335	FN1	CDS
chr2	216300428	216300449	CITS_196	4	-	1.07e-04	2335	FN1	CDS
chr20	2635733	2635754	CITS_197	5	+	1.55e-05	677831	SNORA51	exon_unclassified
chr20	17943579	17943600	CITS_200	6	-	8.78e-06	27131	SNX5	exon_unclassified
chr20	26189044	26189065	CITS_201	10	-	2.35e-06	284801	LOC284801	intron
chr20	26189045	26189066	CITS_202	11	-	1.48e-07	284801	LOC284801	intron
chr20	26189046	26189067	CITS_203	10	-	2.35e-06	284801	LOC284801	intron
chr20	26189047	26189068	CITS_204	22	-	4.00e-14	284801	LOC284801	intron
chr20	26189064	26189085	CITS_205	9	-	3.34e-05	284801	LOC284801	intron
chr20	26189970	26189991	CITS_206	9	-	1.16e-09			upstream_10k
chr20	26189996	26190017	CITS_207	9	-	1.16e-09			upstream_10k
chr20	26190017	26190038	CITS_208	8	-	5.57e-08			upstream_10k
chr20	47896850	47896871	CITS_198	4	+	1.49e-04	441951	ZNFX1-AS1	exon_unclassified
chr20	62513840	62513861	CITS_199	3	+	8.06e-04	7165	TPD52L2	intron
chr21	9825579	9825600	CITS_209	7	+	9.03e-05			downstream_10k||upstream_10k
chr21	9825580	9825601	CITS_210	11	+	1.47e-10			downstream_10k||upstream_10k
chr21	9825924	9825945	CITS_211	14	+	8.22e-11	100500862	MIR3648	exon_unclassified
chr21	9825925	9825946	CITS_212	11	+	5.67e-07	100500862	MIR3648	exon_unclassified
chr21	9825926	9825947	CITS_213	45	+	1.00e-100	100500862	MIR3648	exon_unclassified
chr21	9825929	9825950	CITS_214	12	+	3.25e-08	100500862	MIR3648	exon_unclassified
chr21	9825991	9826012	CITS_215	9	+	1.29e-04	100500862	MIR3648	exon_unclassified
chr21	9825992	9826013	CITS_216	13	+	1.70e-09	100500862	MIR3648	exon_unclassified
chr21	9825993	9826014	CITS_217	11	+	5.67e-07	100500862	MIR3648	exon_unclassified
chr21	9825994	9826015	CITS_218	21	+	1.00e-100	100500862	MIR3648	exon_unclassified
chr21	9825995	9826016	CITS_219	12	+	3.25e-08	100500862	MIR3648	exon_unclassified
chr21	9826176	9826197	CITS_220	13	+	1.70e-09			downstream_10k||upstream_10k
chr21	9826724	9826745	CITS_221	9	+	3.06e-04			downstream_10k
chr21	9826727	9826748	CITS_222	9	+	3.06e-04			downstream_10k
chr21	9826883	9826904	CITS_223	26	+	1.00e-100			downstream_10k
chr21	9826884	9826905	CITS_224	10	+	2.57e-05			downstream_10k
chr21	9826886	9826907	CITS_225	12	+	1.33e-07			downstream_10k
chr21	9826887	9826908	CITS_226	49	+	1.00e-100			downstream_10k
chr21	44265129	44265150	CITS_227	4	-	4.83e-05	10785	WDR4	exon_unclassified
chr21	46190628	46190649	CITS_228	4	-	5.16e-04	7327	UBE2G2	3'UTR
chr22	36139679	36139700	CITS_230	4	-	1.06e-04	23543	RBFOX2	3'UTR
chr22	36678181	36678202	CITS_231	4	-	4.08e-04	4627	MYH9	3'UTR
chr22	46466634	46466655	CITS_229	4	+	1.67e-04	400931	MIRLET7BHG	intron
chr3	23932344	23932365	CITS_232	4	+	2.26e-04	7324	UBE2E1	3'UTR
chr3	33184528	33184549	CITS_233	5	+	1.63e-05	10491	CRTAP	3'UTR
chr3	47628317	47628338	CITS_238	3	-	8.73e-04	6599	SMARCC1	3'UTR
chr3	47629267	47629288	CITS_239	4	-	2.96e-04	6599	SMARCC1	3'UTR
chr3	88044728	88044749	CITS_240	6	-	1.24e-06			deep_intergenic
chr3	120115051	120115072	CITS_241	4	-	1.13e-04	11167	FSTL1	3'UTR
chr3	123212815	123212836	CITS_242	4	-	1.16e-04			downstream_10k
chr3	128532387	128532408	CITS_234	12	+	6.21e-09	7879	RAB7A	3'UTR
chr3	128532399	128532420	CITS_235	8	+	3.39e-04	7879	RAB7A	3'UTR
chr3	160146582	160146603	CITS_236	4	+	3.69e-05	10051	SMC4	CDS
chr3	160232788	160232809	CITS_243	4	-	3.42e-04	677767	SCARNA7	exon_unclassified
chr3	161147373	161147394	CITS_244	4	-	1.06e-04			deep_intergenic
chr3	176739445	176739466	CITS_245	4	-	1.32e-04	79718	TBL1XR1	3'UTR
chr3	186504497	186504518	CITS_237	20	+	1.00e-100	100302143	MIR1248	exon_unclassified
chr3	189675504	189675525	CITS_246	6	-	9.26e-06	55214	LEPREL1	3'UTR
chr4	1019981	1020002	CITS_247	8	+	1.97e-07	53834	FGFRL1	3'UTR
chr4	1239323	1239344	CITS_251	4	-	3.20e-04	1487	CTBP1	intron
chr4	16503823	16503844	CITS_252	4	-	8.35e-05	9079	LDB2	3'UTR
chr4	41957205	41957226	CITS_248	4	+	1.16e-04	55161	TMEM33	3'UTR
chr4	77957102	77957123	CITS_249	6	+	2.58e-07	55752	SEPT11	3'UTR
chr4	129192188	129192209	CITS_254	4	-	1.59e-04	10424	PGRMC2	3'UTR
chr4	187629083	187629104	CITS_255	4	-	1.85e-05	2195	FAT1	CDS
chr5	17276030	17276051	CITS_256	8	+	8.01e-04	10409	BASP1	3'UTR
chr5	17276048	17276069	CITS_257	15	+	3.17e-12	10409	BASP1	3'UTR
chr5	17276050	17276071	CITS_258	10	+	5.19e-06	10409	BASP1	3'UTR
chr5	17276052	17276073	CITS_259	10	+	5.19e-06	10409	BASP1	3'UTR
chr5	36026486	36026507	CITS_271	4	-	8.41e-05			downstream_10k
chr5	36028995	36029016	CITS_272	4	-	2.70e-04			downstream_10k
chr5	36183399	36183420	CITS_260	4	+	1.68e-04	6502	SKP2	3'UTR
chr5	37290334	37290355	CITS_273	5	-	1.92e-06			downstream_10k
chr5	40826668	40826689	CITS_274	4	-	1.03e-04	100506548	LOC100506548	exon_unclassified
chr5	53841210	53841231	CITS_261	4	+	4.19e-04	112574	SNX18	3'UTR
chr5	60628989	60629010	CITS_262	4	+	4.02e-04	57688	ZSWIM6	intron
chr5	70805993	70806014	CITS_263	4	+	6.08e-05	55814	BDP1	CDS
chr5	76029598	76029619	CITS_264	6	+	4.69e-08	2149	F2R	3'UTR
chr5	76029695	76029716	CITS_265	4	+	3.56e-04	2149	F2R	3'UTR
chr5	93018894	93018915	CITS_275	4	-	4.26e-04	83989	FAM172A	intron
chr5	112213697	112213718	CITS_276	6	-	4.64e-04	7905	REEP5	3'UTR
chr5	133291697	133291718	CITS_277	4	-	2.36e-04	56951	C5orf15	3'UTR
chr5	133533424	133533445	CITS_278	3	-	8.19e-04	5515	PPP2CA	3'UTR
chr5	151041883	151041904	CITS_279	5	-	6.94e-04	6678	SPARC	3'UTR
chr5	151042296	151042317	CITS_280	6	-	5.93e-05	6678	SPARC	3'UTR
chr5	151042729	151042750	CITS_281	9	-	2.39e-06	6678	SPARC	3'UTR
chr5	151042730	151042751	CITS_282	8	-	4.75e-05	6678	SPARC	3'UTR
chr5	151042734	151042755	CITS_283	29	-	6.38e-14	6678	SPARC	3'UTR
chr5	151042735	151042756	CITS_284	19	-	6.38e-14	6678	SPARC	3'UTR
chr5	151042736	151042757	CITS_285	7	-	8.25e-04	6678	SPARC	3'UTR
chr5	151042875	151042896	CITS_286	8	-	4.75e-05	6678	SPARC	3'UTR
chr5	151042991	151043012	CITS_287	8	-	4.75e-05	6678	SPARC	3'UTR
chr5	154194249	154194270	CITS_266	4	+	1.41e-04	23367	LARP1	3'UTR
chr5	174956491	174956512	CITS_267	3	+	9.63e-04			downstream_10k
chr5	179151736	179151757	CITS_268	4	+	2.88e-05	821	CANX	CDS
chr5	179156540	179156561	CITS_269	4	+	6.62e-04	821	CANX	3'UTR
chr5	179157287	179157308	CITS_270	5	+	2.56e-04	821	CANX	3'UTR
chr6	30692513	30692534	CITS_288	8	+	7.23e-08	203068	TUBB	3'UTR
chr6	34213542	34213563	CITS_289	13	+	9.58e-12	3159	HMGA1	3'UTR
chr6	34213545	34213566	CITS_290	8	+	4.01e-05	3159	HMGA1	3'UTR
chr6	40554649	40554670	CITS_295	4	-	8.87e-05	57497	LRFN2	intron
chr6	42855917	42855938	CITS_291	4	+	1.43e-04			exon_unclassified
chr6	86387076	86387097	CITS_296	6	-	4.29e-06	387066	SNHG5	exon_unclassified
chr6	122765235	122765256	CITS_297	5	-	9.04e-05	57515	SERINC1	3'UTR
chr6	124607836	124607857	CITS_298	4	-	1.79e-04			deep_intergenic
chr6	133137931	133137952	CITS_292	8	+	2.64e-09	6206	RPS12	3'UTR
chr6	133138346	133138367	CITS_293	8	+	1.10e-08	594839	SNORA33	3'UTR
chr6	133138409	133138430	CITS_294	5	+	5.28e-04	6206	RPS12	3'UTR
chr6	160200993	160201014	CITS_299	4	-	3.67e-04	6950	TCP1	CDS
chr7	2164390	2164411	CITS_313	4	-	2.54e-04	8379	MAD1L1	intron
chr7	2701682	2701703	CITS_300	6	+	5.59e-06	80727	TTYH3	3'UTR
chr7	5569351	5569372	CITS_314	3	-	6.39e-04	60	ACTB	exon_unclassified
chr7	26251921	26251942	CITS_301	3	+	9.97e-04	11335	CBX3	3'UTR
chr7	44872563	44872584	CITS_315	6	-	1.37e-07	94239	H2AFV	intron
chr7	48672356	48672377	CITS_302	11	+	3.34e-06	154664	ABCA13	intron
chr7	94296194	94296215	CITS_303	5	+	3.99e-05	23089	PEG10	3'UTR
chr7	114658069	114658090	CITS_304	4	+	1.73e-04	29969	MDFIC	3'UTR
chr7	116147061	116147082	CITS_305	6	+	2.16e-05	857	CAV1	3'UTR
chr7	116199957	116199978	CITS_306	8	+	1.18e-05	857	CAV1	3'UTR
chr7	116200774	116200795	CITS_307	7	+	2.77e-04	857	CAV1	3'UTR
chr7	116200800	116200821	CITS_308	9	+	4.43e-07	857	CAV1	3'UTR
chr7	116200827	116200848	CITS_309	9	+	4.43e-07	857	CAV1	3'UTR
chr7	128409624	128409645	CITS_310	4	+	5.23e-04	813	CALU	3'UTR
chr7	137563719	137563740	CITS_316	5	-	7.91e-06	64764	CREB3L2	3'UTR
chr7	148117817	148117838	CITS_311	4	+	2.54e-05	26047	CNTNAP2	3'UTR
chr7	150812854	150812875	CITS_312	3	+	5.32e-04	116988	AGAP3	intron
chr8	11701939	11701960	CITS_319	3	-	7.48e-04	1508	CTSB	3'UTR
chr8	26514773	26514794	CITS_317	4	+	6.70e-04	1808	DPYSL2	3'UTR
chr8	26515001	26515022	CITS_318	5	+	3.84e-04	1808	DPYSL2	3'UTR
chr8	38175214	38175235	CITS_320	4	-	2.30e-05	54904	WHSC1L1	3'UTR
chr8	97171012	97171033	CITS_321	4	-	3.97e-04	392255	GDF6	intron
chr8	99054372	99054393	CITS_322	5	-	1.95e-05	26775	SNORA72	exon_unclassified
chr8	101931423	101931444	CITS_323	4	-	2.11e-04	7534	YWHAZ	3'UTR
chr8	101931893	101931914	CITS_324	6	-	4.90e-07	7534	YWHAZ	3'UTR
chr8	131064700	131064721	CITS_325	4	-	1.74e-04	50807	ASAP1	3'UTR
chr8	144576779	144576800	CITS_326	4	-	2.69e-04	23144	ZC3H3	intron
chr8	144989793	144989814	CITS_327	4	-	1.10e-04	5339	PLEC	3'UTR
chr8	145018726	145018747	CITS_328	4	-	5.40e-05	5339	PLEC	intron
chr9	33030558	33030579	CITS_329	4	+	1.15e-05	3301	DNAJA1	CDS
chr9	34634830	34634851	CITS_331	22	-	2.84e-14	10280	SIGMAR1	3'UTR
chr9	34634839	34634860	CITS_332	14	-	1.26e-08	10280	SIGMAR1	3'UTR
chr9	34634840	34634861	CITS_333	11	-	1.84e-05	10280	SIGMAR1	3'UTR
chr9	34634842	34634863	CITS_334	16	-	6.64e-11	10280	SIGMAR1	3'UTR
chr9	35657802	35657823	CITS_335	17	-	7.01e-11	6023	RMRP	exon_unclassified
chr9	35657814	35657835	CITS_336	46	-	1.00e-100	6023	RMRP	exon_unclassified
chr9	35657946	35657967	CITS_337	16	-	9.39e-10	6023	RMRP	exon_unclassified
chr9	35657947	35657968	CITS_338	27	-	1.00e-100	6023	RMRP	exon_unclassified
chr9	35657949	35657970	CITS_339	11	-	1.38e-04	6023	RMRP	exon_unclassified
chr9	35657961	35657982	CITS_340	18	-	4.89e-12	6023	RMRP	exon_unclassified
chr9	117783152	117783173	CITS_341	4	-	5.94e-04	3371	TNC	3'UTR
chr9	130210842	130210863	CITS_342	7	-	1.10e-07	6136	RPL12	exon_unclassified
chr9	134372291	134372312	CITS_330	4	+	1.40e-05	84726	PRRC2B	3'UTR
chr9	136229072	136229093	CITS_343	4	-	5.29e-05	6836	SURF4	3'UTR
chrM	638	659	CITS_344	5	+	8.93e-05			exon_unclassified
chrM	910	931	CITS_345	25	+	1.00e-100			downstream_10k||upstream_10k
chrM	1695	1716	CITS_346	41	+	1.00e-100			downstream_10k||upstream_10k
chrM	1814	1835	CITS_348	31	+	1.00e-100			exon_unclassified
chrM	1838	1859	CITS_349	36	+	1.00e-100			exon_unclassified
chrM	1839	1860	CITS_350	42	+	1.00e-100			exon_unclassified
chrM	1843	1864	CITS_351	23	+	9.36e-09			exon_unclassified
chrM	1844	1865	CITS_352	21	+	4.26e-07			exon_unclassified
chrM	1857	1878	CITS_354	22	+	6.47e-08			exon_unclassified
chrM	1864	1885	CITS_355	34	+	1.00e-100			exon_unclassified
chrM	2029	2050	CITS_356	47	+	1.00e-100			exon_unclassified
chrM	2062	2083	CITS_357	25	+	1.71e-10			exon_unclassified
chrM	2102	2123	CITS_359	22	+	6.47e-08			exon_unclassified
chrM	2116	2137	CITS_360	26	+	2.17e-11			exon_unclassified
chrM	2196	2217	CITS_361	29	+	1.00e-100			exon_unclassified
chrM	2203	2224	CITS_362	21	+	4.26e-07			exon_unclassified
chrM	2206	2227	CITS_363	25	+	1.71e-10			exon_unclassified
chrM	2210	2231	CITS_364	47	+	1.00e-100			exon_unclassified
chrM	2213	2234	CITS_365	32	+	1.00e-100			exon_unclassified
chrM	2216	2237	CITS_366	35	+	1.00e-100			exon_unclassified
chrM	2217	2238	CITS_367	96	+	1.00e-100			exon_unclassified
chrM	2218	2239	CITS_368	23	+	9.36e-09			exon_unclassified
chrM	2222	2243	CITS_369	21	+	4.26e-07			exon_unclassified
chrM	2223	2244	CITS_370	34	+	1.00e-100			exon_unclassified
chrM	2226	2247	CITS_371	36	+	1.00e-100			exon_unclassified
chrM	2227	2248	CITS_372	17	+	4.76e-04			exon_unclassified
chrM	2231	2252	CITS_373	147	+	1.00e-100			exon_unclassified
chrM	2233	2254	CITS_374	63	+	1.00e-100			exon_unclassified
chrM	2248	2269	CITS_375	33	+	1.00e-100			exon_unclassified
chrM	2254	2275	CITS_376	18	+	8.96e-05			exon_unclassified
chrM	2342	2363	CITS_377	21	+	4.26e-07			exon_unclassified
chrM	2388	2409	CITS_378	26	+	2.17e-11			exon_unclassified
chrM	2391	2412	CITS_379	18	+	8.96e-05			exon_unclassified
chrM	2394	2415	CITS_380	38	+	1.00e-100			exon_unclassified
chrM	2396	2417	CITS_381	71	+	1.00e-100			exon_unclassified
chrM	2399	2420	CITS_382	20	+	2.67e-06			exon_unclassified
chrM	2814	2835	CITS_383	10	+	1.47e-06			exon_unclassified
chrM	3123	3144	CITS_385	9	+	2.45e-05			exon_unclassified
chrM	4661	4682	CITS_386	8	+	3.40e-04			downstream_10k||upstream_10k
chrM	4670	4691	CITS_387	15	+	8.81e-13			downstream_10k||upstream_10k
chrM	14528	14549	CITS_388	6	-	1.22e-06			intron
chrX	24721356	24721377	CITS_389	4	+	1.63e-04	5422	POLA1	CDS
chrX	44310136	44310157	CITS_390	7	+	1.00e-03			deep_intergenic
chrX	77381783	77381804	CITS_391	4	+	3.46e-05	5230	PGK1	3'UTR
chrX	118751096	118751117	CITS_393	7	-	3.81e-05	23157	SEPT6	3'UTR
chrX	118751098	118751119	CITS_394	7	-	3.81e-05	23157	SEPT6	3'UTR
chrX	135046452	135046473	CITS_395	4	-	5.55e-05	93380	MMGT1	3'UTR
chrX	153628660	153628681	CITS_392	4	+	1.70e-05	26778	SNORA70	exon_unclassified
chrX	153760104	153760125	CITS_396	4	-	6.30e-05	2539	G6PD	3'UTR
chrY	10037835	10037856	CITS_397	8	+	3.27e-08			exon_unclassified

## Sheet: CITS sh4
chr	start	end	CITS id	#supporting tags	strand	pval	gene id	gene symbol	region
chr1	44456582	44456603	CITS_1	4	+	4.99e-05	8704	B4GALT2	3'UTR
chr1	45244050	45244071	CITS_2	8	+	4.79e-08	6202	RPS8	exon_unclassified
chr1	150193054	150193075	CITS_4	3	-	7.26e-04	81611	ANP32E	CDS
chr1	168214875	168214896	CITS_3	5	+	3.07e-05	9095	TBX19	intron
chr1	173833562	173833583	CITS_5	5	-	2.93e-05	60674	GAS5	exon_unclassified
chr10	17279358	17279379	CITS_6	4	+	4.12e-04	7431	VIM	3'UTR
chr11	8706974	8706995	CITS_7	5	+	7.52e-05	677826	SNORA45	exon_unclassified
chr11	32956863	32956884	CITS_8	4	+	9.76e-04	79832	QSER1	CDS
chr11	44955896	44955917	CITS_15	5	-	8.51e-04	9537	TP53I11	3'UTR
chr11	57067322	57067343	CITS_16	3	-	8.87e-04	85456	TNKS1BP1	3'UTR
chr11	62622829	62622850	CITS_17	7	-	1.04e-06	9302	SNORD26	exon_unclassified
chr11	65267113	65267134	CITS_9	6	+	2.56e-04	378938	MALAT1	exon_unclassified
chr11	65267120	65267141	CITS_10	6	+	2.56e-04	378938	MALAT1	exon_unclassified
chr11	65267198	65267219	CITS_11	6	+	2.56e-04	378938	MALAT1	exon_unclassified
chr11	69467507	69467528	CITS_12	11	+	6.57e-11	595	CCND1	3'UTR
chr11	69467523	69467544	CITS_13	7	+	7.03e-05	595	CCND1	3'UTR
chr11	69467536	69467557	CITS_14	18	+	1.00e-100	595	CCND1	3'UTR
chr11	74972251	74972272	CITS_18	7	-	1.55e-04	408	ARRB1	3'UTR
chr12	66451449	66451470	CITS_21	10	-	4.77e-04			deep_intergenic
chr12	66451451	66451472	CITS_22	15	-	5.29e-09			deep_intergenic
chr12	66451452	66451473	CITS_23	52	-	1.13e-14			deep_intergenic
chr12	66451453	66451474	CITS_24	13	-	6.54e-07			deep_intergenic
chr12	94902395	94902416	CITS_19	4	+	7.24e-04			deep_intergenic
chr12	113827872	113827893	CITS_20	5	+	4.26e-04			downstream_10k
chr13	21949249	21949270	CITS_25	6	-	9.43e-04	253832	ZDHHC20	3'UTR
chr13	21949262	21949283	CITS_26	7	-	5.44e-05	253832	ZDHHC20	3'UTR
chr14	20811560	20811581	CITS_27	14	-	3.83e-14	85495	RPPH1	exon_unclassified
chr14	95999745	95999766	CITS_28	4	-	4.30e-04	677768	SCARNA13	exon_unclassified
chr14	99712080	99712101	CITS_29	4	-	4.15e-05	64919	BCL11B	intron
chr15	41672507	41672528	CITS_30	4	+	3.06e-05	51203	NUSAP1	3'UTR
chr15	45010151	45010172	CITS_31	5	+	2.06e-04	567	B2M	3'UTR
chr15	77910937	77910958	CITS_32	7	-	2.18e-05	84894	LINGO1	intron
chr16	1204195	1204216	CITS_33	3	+	7.05e-04	8912	CACNA1H	intron
chr16	18803413	18803434	CITS_38	4	-	9.52e-04	23204	ARL6IP1	3'UTR
chr16	33961261	33961282	CITS_34	7	+	5.05e-06			upstream_10k
chr16	67133789	67133810	CITS_35	4	+	3.80e-04	865	CBFB	3'UTR
chr16	69336763	69336784	CITS_36	4	+	7.58e-05	6645	SNTB2	3'UTR
chr16	81119757	81119778	CITS_37	6	+	1.02e-04			deep_intergenic
chr17	65335491	65335512	CITS_39	4	-	3.49e-05			downstream_10k
chr17	79477186	79477207	CITS_40	5	-	2.33e-04	71	ACTG1	3'UTR
chr18	49956897	49956918	CITS_41	4	+	6.49e-05	1630	DCC	intron
chr19	582938	582959	CITS_42	8	+	3.52e-07	682	BSG	3'UTR
chr19	3976311	3976332	CITS_44	4	-	5.47e-04	1938	EEF2	3'UTR
chr19	17973446	17973467	CITS_43	4	+	2.19e-04	26780	SNORA68	exon_unclassified
chr2	9725118	9725139	CITS_47	4	-	4.81e-05	10971	YWHAQ	3'UTR
chr2	27170893	27170914	CITS_45	4	+	9.16e-04	56896	DPYSL5	3'UTR
chr2	33141386	33141407	CITS_48	7	-	2.26e-08			deep_intergenic
chr2	75120104	75120125	CITS_46	4	+	7.78e-04	3099	HK2	3'UTR
chr2	133015254	133015275	CITS_49	17	-	2.63e-14	554226	ANKRD30BL	exon_unclassified
chr2	232325267	232325288	CITS_50	9	-	1.67e-10	4691	NCL	CDS
chr20	4681128	4681149	CITS_51	6	+	1.42e-07	5621	PRNP	3'UTR
chr20	5975097	5975118	CITS_52	4	+	4.70e-04	84515	MCM8	3'UTR
chr20	26189045	26189066	CITS_53	9	-	1.56e-07	284801	LOC284801	intron
chr20	26189047	26189068	CITS_54	15	-	1.00e-100	284801	LOC284801	intron
chr20	26189389	26189410	CITS_55	7	-	4.60e-11	284801	LOC284801	intron
chr20	26189970	26189991	CITS_56	5	-	9.42e-05			upstream_10k
chr20	26190017	26190038	CITS_57	6	-	1.51e-06			upstream_10k
chr21	9825924	9825945	CITS_58	15	+	1.00e-100	100500862	MIR3648	exon_unclassified
chr21	9825925	9825946	CITS_59	8	+	2.33e-05	100500862	MIR3648	exon_unclassified
chr21	9825926	9825947	CITS_60	31	+	1.00e-100	100500862	MIR3648	exon_unclassified
chr21	9825993	9826014	CITS_61	7	+	4.81e-04	100500862	MIR3648	exon_unclassified
chr21	9825994	9826015	CITS_62	23	+	1.00e-100	100500862	MIR3648	exon_unclassified
chr21	9825995	9826016	CITS_63	9	+	9.86e-07	100500862	MIR3648	exon_unclassified
chr21	9826006	9826027	CITS_64	12	+	3.82e-11	100500862	MIR3648	exon_unclassified
chr21	9826202	9826223	CITS_65	7	+	4.81e-04	100500815	MIR3687	exon_unclassified
chr21	9826728	9826749	CITS_66	7	+	5.72e-04			downstream_10k
chr21	9826860	9826881	CITS_67	8	+	3.42e-05			downstream_10k
chr21	9826880	9826901	CITS_68	8	+	3.42e-05			downstream_10k
chr21	9826883	9826904	CITS_69	8	+	3.42e-05			downstream_10k
chr21	9826887	9826908	CITS_70	9	+	1.78e-06			downstream_10k
chr22	43011299	43011320	CITS_71	9	+	1.53e-08	267010	RNU12	exon_unclassified
chr22	43011314	43011335	CITS_72	6	+	2.89e-04	267010	RNU12	exon_unclassified
chr22	44518423	44518444	CITS_73	3	-	9.32e-04			deep_intergenic
chr3	136420981	136421002	CITS_75	7	-	5.89e-07	10274	STAG1	intron
chr3	186504497	186504518	CITS_74	23	+	1.00e-100	100302143	MIR1248	exon_unclassified
chr4	1019610	1019631	CITS_76	6	+	1.48e-05	53834	FGFRL1	3'UTR
chr4	15543153	15543174	CITS_77	4	+	1.19e-04	57545	CC2D2A	intron
chr4	49275699	49275720	CITS_78	7	+	4.36e-08			deep_intergenic
chr4	177252189	177252210	CITS_79	4	+	3.62e-04	60559	SPCS3	3'UTR
chr5	17276042	17276063	CITS_80	7	+	6.59e-05	10409	BASP1	3'UTR
chr5	36026711	36026732	CITS_83	4	-	7.91e-05			downstream_10k
chr5	36035687	36035708	CITS_84	5	-	7.56e-06	167127	UGT3A2	3'UTR
chr5	71505093	71505114	CITS_81	4	+	1.41e-04	4131	MAP1B	3'UTR
chr5	82349890	82349911	CITS_85	3	-	5.59e-04	153339	TMEM167A	3'UTR
chr5	151042734	151042755	CITS_86	10	-	4.66e-11	6678	SPARC	3'UTR
chr5	179157187	179157208	CITS_82	4	+	1.19e-04	821	CANX	3'UTR
chr6	133138409	133138430	CITS_87	6	+	3.97e-08	6206	RPS12	3'UTR
chr8	24774900	24774921	CITS_88	3	+	5.38e-04	4741	NEFM	CDS
chr8	101715550	101715571	CITS_89	9	-	2.41e-09	26986	PABPC1	3'UTR
chr8	101931682	101931703	CITS_90	4	-	2.69e-04	7534	YWHAZ	3'UTR
chr8	131083239	131083260	CITS_91	4	-	1.67e-04	50807	ASAP1	intron
chr9	34634830	34634851	CITS_93	14	-	5.59e-13	10280	SIGMAR1	3'UTR
chr9	34634840	34634861	CITS_94	7	-	6.41e-04	10280	SIGMAR1	3'UTR
chr9	34635563	34635584	CITS_95	4	-	3.02e-04	10280	SIGMAR1	3'UTR
chr9	35657814	35657835	CITS_96	23	-	1.00e-100	6023	RMRP	exon_unclassified
chr9	35657946	35657967	CITS_97	36	-	1.00e-100	6023	RMRP	exon_unclassified
chr9	35657947	35657968	CITS_98	23	-	1.00e-100	6023	RMRP	exon_unclassified
chr9	35657949	35657970	CITS_99	15	-	1.53e-09	6023	RMRP	exon_unclassified
chr9	35657960	35657981	CITS_100	10	-	3.13e-04	6023	RMRP	exon_unclassified
chr9	35657961	35657982	CITS_101	18	-	3.65e-13	6023	RMRP	exon_unclassified
chr9	90113147	90113168	CITS_92	4	+	1.86e-05	1612	DAPK1	intron
chr9	130210842	130210863	CITS_102	4	-	6.16e-04	26783	SNORA65	exon_unclassified
chr9	139621255	139621276	CITS_103	11	-	1.00e-100	84973	SNHG7	exon_unclassified
chrM	910	931	CITS_104	6	+	2.28e-05			downstream_10k||upstream_10k
chrM	1695	1716	CITS_105	30	+	1.00e-100			downstream_10k||upstream_10k
chrM	1706	1727	CITS_106	16	+	7.34e-05			downstream_10k||upstream_10k
chrM	1814	1835	CITS_107	18	+	1.61e-06			exon_unclassified
chrM	1838	1859	CITS_108	16	+	7.34e-05			exon_unclassified
chrM	1839	1860	CITS_109	30	+	1.00e-100			exon_unclassified
chrM	1844	1865	CITS_110	25	+	3.02e-13			exon_unclassified
chrM	1851	1872	CITS_111	15	+	4.49e-04			exon_unclassified
chrM	1857	1878	CITS_112	19	+	2.19e-07			exon_unclassified
chrM	2029	2050	CITS_113	25	+	3.02e-13			exon_unclassified
chrM	2061	2082	CITS_114	22	+	3.97e-10			exon_unclassified
chrM	2062	2083	CITS_115	15	+	4.49e-04			exon_unclassified
chrM	2102	2123	CITS_116	19	+	2.19e-07			exon_unclassified
chrM	2116	2137	CITS_117	26	+	1.00e-100			exon_unclassified
chrM	2196	2217	CITS_118	23	+	4.38e-11			exon_unclassified
chrM	2203	2224	CITS_119	34	+	1.00e-100			exon_unclassified
chrM	2206	2227	CITS_120	29	+	1.00e-100			exon_unclassified
chrM	2210	2231	CITS_121	57	+	1.00e-100			exon_unclassified
chrM	2213	2234	CITS_122	28	+	1.00e-100			exon_unclassified
chrM	2216	2237	CITS_123	40	+	1.00e-100			exon_unclassified
chrM	2217	2238	CITS_124	69	+	1.00e-100			exon_unclassified
chrM	2218	2239	CITS_125	15	+	4.49e-04			exon_unclassified
chrM	2221	2242	CITS_126	18	+	1.61e-06			exon_unclassified
chrM	2226	2247	CITS_127	16	+	7.34e-05			exon_unclassified
chrM	2231	2252	CITS_128	134	+	1.00e-100			exon_unclassified
chrM	2233	2254	CITS_129	60	+	1.00e-100			exon_unclassified
chrM	2248	2269	CITS_130	27	+	1.00e-100			exon_unclassified
chrM	2253	2274	CITS_131	19	+	2.19e-07			exon_unclassified
chrM	2342	2363	CITS_132	57	+	1.00e-100			exon_unclassified
chrM	2343	2364	CITS_133	15	+	4.49e-04			exon_unclassified
chrM	2354	2375	CITS_134	15	+	4.49e-04			exon_unclassified
chrM	2388	2409	CITS_135	16	+	7.34e-05			exon_unclassified
chrM	2394	2415	CITS_136	22	+	3.97e-10			exon_unclassified
chrM	2395	2416	CITS_137	15	+	4.49e-04			exon_unclassified
chrM	2396	2417	CITS_138	32	+	1.00e-100			exon_unclassified
chrM	3099	3120	CITS_139	9	+	9.72e-08			exon_unclassified
chrM	4670	4691	CITS_140	7	+	3.73e-05			downstream_10k||upstream_10k
chrX	44310136	44310157	CITS_141	12	+	9.29e-07			deep_intergenic
chrX	44310137	44310158	CITS_142	10	+	8.20e-05			deep_intergenic
