# Supplementary material for: The transcribed pseudogene RPSAP52 enhances the oncofetal HMGA2-IGF2BP2-RAS axis through LIN28B-dependent and independent let-7 inhibition
Source: Nat Commun. 2019 Sep 4;10:3979. doi: 10.1038/s41467-019-11910-6 (PMC6726650; doi:10.1038/s41467-019-11910-6)
Supplement: Supplementary file 5 — Supplementary Data 2 [file 41467_2019_11910_MOESM5_ESM.xlsx]

## Sheet: up_A673_sh4_vs_A673_scr
# Fold Change cut-off: 2.0 # P-value cut-off: 0.05 # Condition pairs: A673_sh4_vs_A673_scr # Column A: ProbeName it represents probe name. # Column B: P-value, P-value calculated from unpaired t-test. # Column C: FDR, FDR is calculated from Benjamini Hochberg FDR. # Column D: Fold change, the absolute ratio (no log scale) of normalized intensities between two conditions. # Column E: Regulation, i…
A673_sh4_vs_A673_scr 2.0 fold up regulated genes
	P-value and FDR		Fold change and Regulation		Annotations								Group--Raw Intensity		Group--Normalized Intensity		Raw Intensity						Normalized Intensity
ProbeName	P-value	FDR	Fold Change	Regulation	GenbankAccession	GenomicCoordinates	GeneSymbol	Description	Go	RefSeqAccession	UniGeneID	EntrezGeneID	group-A673_sh4(raw)	group-A673_scr(raw)	group-A673_sh4(normalized)	group-A673_scr(normalized)	[A673_sh4_1, A673_sh4](raw)	[A673_sh4_2, A673_sh4](raw)	[A673_sh4_3, A673_sh4](raw)	[A673_scr1, A673_scr](raw)	[A673_scr2, A673_scr](raw)	[A673_scr3, A673_scr](raw)	[A673_sh4_1, A673_sh4](normalized)	[A673_sh4_2, A673_sh4](normalized)	[A673_sh4_3, A673_sh4](normalized)	[A673_scr1, A673_scr](normalized)	[A673_scr2, A673_scr](normalized)	[A673_scr3, A673_scr](normalized)
A_32_P141418	0.022503	0.565244	14.5756	up	NM_018076	chr10:28101158-28101099	ARMC4	Homo sapiens armadillo repeat containing 4 (ARMC4), mRNA [NM_018076]		NM_018076	Hs.127530	55130	159.793	18.7337	7.23606	3.37057	149.919	109.331	220.13	46.2011	5	5	7.09432	6.87029	7.74356	5.44545	2.32967	2.3366
A_23_P134663	0.0207638	0.562512	9.77446	up	NM_024812	chr8:104242447-104242506	BAALC	Homo sapiens brain and acute leukemia, cytoplasmic (BAALC), transcript variant 1, mRNA [NM_024812]	GO:0005813|GO:0005737|GO:0016020|GO:0005730|GO:0005634	NM_024812	Hs.533446	79870	152.125	17.572	7.01523	3.72621	241.279	61.6445	153.451	30.7221	16.9939	5	7.75971	6.04395	7.24203	4.79878	4.04327	2.3366
A_33_P3294509	0.0120204	0.496995	9.55765	up	NM_000610	chr11:35253812-35253871	CD44	Homo sapiens CD44 molecule (Indian blood group) (CD44), transcript variant 1, mRNA [NM_000610]	GO:0005515|GO:0001658|GO:0005886|GO:0051216|GO:0005518|GO:0019221|GO:0050731|GO:0044281|GO:0016323|GO:0016337|GO:0033138|GO:0005540|GO:0030198|GO:0034116|GO:0070374|GO:0043154|GO:0016055|GO:1900625|GO:0030203|GO:0060333|GO:0043066|GO:0009986|GO:0005975|GO:0002246|GO:0044344|GO:0060442|GO:0010628|GO:0007160|GO:0005887|GO:0070487|GO:0043518|GO:0030212|GO:0004415|GO:0030214|GO:0009897|GO:0004888	NM_000610	Hs.502328	960	942.766	119.927	9.76363	6.50698	1199.31	1000.93	628.061	249.118	63.181	47.4817	10.0711	9.97807	9.24176	7.90399	5.82247	5.79446
A_23_P216307	0.0114082	0.495657	8.44615	up	NM_004349	chr8:92972310-92972251	RUNX1T1	Homo sapiens runt-related transcription factor 1; translocated to, 1 (cyclin D-related) (RUNX1T1), transcript variant 1, mRNA [NM_004349]	GO:0005515|GO:0003700|GO:0051101|GO:0045444|GO:0006091|GO:0003677|GO:0046872|GO:0042803|GO:0016363|GO:0006351|GO:0042802	NM_004349	Hs.368431	862	69.9673	9.7293	5.99358	2.91528	100.52	35.8425	73.5393	19.1879	5	5	6.52884	5.26126	6.19064	4.07959	2.32967	2.3366
A_33_P3293858	0.0243721	0.568771	7.8289	up	NM_001033602	chr13:30080017-30080076	MTUS2	Homo sapiens microtubule associated tumor suppressor candidate 2 (MTUS2), transcript variant 1, mRNA [NM_001033602]	GO:0008017|GO:0005515|GO:0005881|GO:0005813|GO:0042803	NM_001033602	Hs.22287	23281	135.87	16.7309	6.83359	3.86478	189.211	48.1415	170.258	14.3524	7.46455	28.3758	7.41829	5.69639	7.38611	3.62643	2.9271	5.04082
A_24_P315056	0.0024512	0.36105	6.83223	up	NM_001128202	chr10:127344608-127344549	TEX36	Homo sapiens testis expressed 36 (TEX36), mRNA [NM_001128202]		NM_001128202	Hs.148259	387718	58.315	9.71666	5.84448	3.07213	65.9358	46.4219	62.5873	14.9828	9.16722	5	5.92457	5.64491	5.96397	3.69192	3.18787	2.3366
A_23_P140434	0.00679571	0.434781	6.80887	up	NM_018728	chr15:52484703-52484644	MYO5C	Homo sapiens myosin VC (MYO5C), mRNA [NM_018728]	GO:0005516|GO:0003774|GO:0003779|GO:0016459|GO:0005524	NM_018728	Hs.487036	55930	50.1772	9.00695	5.62186	2.85444	63.902	43.4794	43.1502	17.0208	5	5	5.88248	5.55254	5.43055	3.89706	2.32967	2.3366
A_23_P148584	0.0424032	0.618136	6.77879	up	NM_144658	chrX:117819952-117820011	DOCK11	Homo sapiens dedicator of cytokinesis 11 (DOCK11), mRNA [NM_144658]	GO:0005543|GO:0007596|GO:0007264|GO:0017048|GO:0005089|GO:0005829	NM_144658	Hs.368203	139818	488.243	105.683	8.84287	6.08184	496.418	366.871	601.439	246.796	31.865	38.389	8.78891	8.55647	9.18323	7.89204	4.8793	5.47418
A_23_P202269	0.00777606	0.447429	6.45819	up	NM_020987	chr10:61788365-61788306	ANK3	Homo sapiens ankyrin 3, node of Ranvier (ankyrin G) (ANK3), transcript variant 1, mRNA [NM_020987]	GO:0008092|GO:0007009|GO:0005515|GO:0072660|GO:2000651|GO:0005886|GO:0043001|GO:0072661|GO:0043266|GO:0007409|GO:0005764|GO:0019228|GO:0045184|GO:0043194|GO:0016323|GO:0009925|GO:0014704|GO:0007411|GO:0010765|GO:0045211|GO:0030674|GO:0045296|GO:0009986|GO:0000281|GO:0071709|GO:0030315|GO:0030507|GO:0033270|GO:0014731|GO:0072659|GO:0016328|GO:0044325|GO:0045838|GO:0042383|GO:0010628|GO:0007165|GO:…	NM_020987	Hs.499725	288	541.393	94.7054	9.01363	6.3225	625.873	497.427	500.88	173.443	67.564	43.109	9.13152	8.98629	8.92308	7.39231	5.92126	5.65392
A_33_P3825869	0.00431337	0.391846	6.40509	up	NM_199460	chr12:2801250-2801309	CACNA1C	Homo sapiens calcium channel, voltage-dependent, L type, alpha 1C subunit (CACNA1C), transcript variant 1, mRNA [NM_199460]	GO:0005515|GO:0035585|GO:0005516|GO:0030018|GO:0060402|GO:0005886|GO:0007268|GO:0044281|GO:0007204|GO:0046872|GO:0019229|GO:0005737|GO:0043198|GO:0007411|GO:0017156|GO:0043025|GO:0007628|GO:0030252|GO:0046620|GO:0005245|GO:0008331|GO:0010881|GO:0014069|GO:0042593|GO:0086064|GO:0005891|GO:0060083|GO:0006112|GO:0002095|GO:0050796|GO:0051393|GO:0008542|GO:0008217|GO:0016021|GO:0030073	NM_199460	Hs.118262	775	105.13	17.815	6.66374	3.98453	113.099	73.7644	128.527	29.4219	15.3066	8.71645	6.68931	6.30946	6.99247	4.73797	3.90905	3.30655
A_33_P3250348	0.0242655	0.568039	6.31824	up	NM_019035	chr4:138440160-138440101	PCDH18	Homo sapiens protocadherin 18 (PCDH18), mRNA [NM_019035]	GO:0005886|GO:0007420|GO:0005509|GO:0016021|GO:0007156	NM_019035	Hs.591691	54510	101.097	19.4297	6.55081	3.89129	133.873	55.8794	113.539	40.3067	10.9329	7.04935	6.93718	5.90308	6.81216	5.22956	3.42857	3.01573
A_32_P58614	0.0238151	0.565383	5.78745	up	NM_020802	chr11:101871701-101871760	KIAA1377	Homo sapiens KIAA1377 (KIAA1377), mRNA [NM_020802]	GO:0005515|GO:0030496	NM_020802	Hs.156352	57562	77.2549	15.4061	6.15647	3.62354	79.0941	42.5078	110.163	31.0884	6.56711	8.56277	6.18038	5.51606	6.77297	4.81626	2.77107	3.28331
A_33_P3301940	0.0244915	0.568918	5.53436	up	NM_018945	chr6:136516635-136516694	PDE7B	Homo sapiens phosphodiesterase 7B (PDE7B), mRNA [NM_018945]	GO:0007165|GO:0004115|GO:0007268|GO:0046872|GO:0006198|GO:0005829	NM_018945	Hs.744230	27115	35.4981	5.21474	4.80824	2.33982	32.4489	10.9811	63.0643	5.64423	5	5	4.89449	3.55222	5.97801	2.35321	2.32967	2.3366
A_23_P76749	0.00292609	0.36726	5.49509	up	NM_020692	chr14:69821071-69821130	GALNT16	Homo sapiens UDP-N-acetyl-alpha-D-galactosamine:polypeptide N-acetylgalactosaminyltransferase 16 (GALNT16), transcript variant 2, mRNA [NM_020692]	GO:0004653|GO:0000139|GO:0006486|GO:0016021	NM_020692	Hs.21035	57452	162.891	30.2775	7.28022	4.82208	213.373	153.99	121.31	46.8691	25.1221	18.8412	7.58542	7.34941	6.90584	5.46394	4.56359	4.43872
A_32_P75581	0.00272627	0.364951	5.42144	up	NM_152414	chr8:65496092-65496151	BHLHE22	Homo sapiens basic helix-loop-helix family, member e22 (BHLHE22), mRNA [NM_152414]	GO:0021960|GO:0021540|GO:0060040|GO:0021957|GO:0003682|GO:0000981|GO:0005634|GO:0045892|GO:0042803	NM_152414	Hs.591870	27319	480.852	88.4807	8.8421	6.40343	482.019	417.478	543.059	125.875	59.3489	80.2187	8.74163	8.74398	9.04069	6.93497	5.72809	6.54721
A_24_P255218	0.0271568	0.579398	5.29227	up	NM_000259	chr15:52643522-52643463	MYO5A	Homo sapiens myosin VA (heavy chain 12, myoxin) (MYO5A), transcript variant 1, mRNA [NM_000259]	GO:0005882|GO:0043005|GO:0005516|GO:0042641|GO:0042640|GO:0007268|GO:0035371|GO:0016459|GO:0006887|GO:0015031|GO:0032402|GO:0030426|GO:0005737|GO:0000146|GO:0051643|GO:0042438|GO:0043025|GO:0042476|GO:0006810|GO:0016192|GO:0030048|GO:0042470|GO:0032869|GO:0017137|GO:0005794|GO:0031585|GO:0042552|GO:0031987|GO:0005509|GO:0003779|GO:0030318|GO:0032252|GO:0072659|GO:0005524|GO:0001726|GO:0050808|GO:…	NM_000259	Hs.21213	4644	281.893	65.3294	8.08385	5.67996	291.327	297.418	256.935	133.386	27.5525	35.0497	8.01884	8.27105	7.96165	7.02795	4.68114	5.33078
A_23_P204304	0.00179858	0.349948	5.0612	up	NM_030667	chr12:15749688-15749747	PTPRO	Homo sapiens protein tyrosine phosphatase, receptor type, O (PTPRO), transcript variant 1, mRNA [NM_030667]	GO:0005515|GO:0072112|GO:0043005|GO:0017147|GO:0030424|GO:0090260|GO:0036060|GO:0005886|GO:0030032|GO:0010812|GO:0042803|GO:0032835|GO:0035335|GO:0030426|GO:0016791|GO:0016324|GO:0006470|GO:0043197|GO:0007411|GO:0005001|GO:0090090|GO:0004725|GO:0003105|GO:0016328|GO:0030027|GO:0002548|GO:0000902|GO:0005887|GO:0003093|GO:0010977|GO:0016021	NM_030667	Hs.160871	5800	97.1472	18.7195	6.53186	4.19238	135.592	91.5119	64.338	24.8319	15.9357	15.3908	6.95868	6.62865	6.00826	4.47686	3.96034	4.13995
A_33_P3273068	0.0267315	0.579398	4.82389	up	AB058691	chr11:44282055-44281996	ALX4	ALX homeobox 4 [Source:HGNC Symbol;Acc:450] [ENST00000329255]	GO:0005667|GO:0003700|GO:0046982|GO:0048704|GO:0048565|GO:0042981|GO:0005634|GO:0009791|GO:0009952|GO:0003677|GO:0006351|GO:0043565|GO:0001501|GO:0007517|GO:0045944|GO:0035116|GO:0071837|GO:0060021|GO:0035115|GO:0001942|GO:0042733		Hs.436055	60529	6224.76	1536.37	12.5327	10.2625	6084.43	5138.07	7451.79	2874.29	1160.96	573.852	12.4282	12.283	12.8869	11.4819	9.97807	9.32753
A_24_P248185	0.0184516	0.544716	4.80831	up	NM_153685	chr12:6803073-6803014	PIANP	Homo sapiens PILR alpha associated neural protein (PIANP), transcript variant 1, mRNA [NM_153685]	GO:0016021	NM_153685	Hs.44067	196500	225.549	47.7819	7.66215	5.39663	198.468	127.816	350.362	74.6404	47.6065	21.0988	7.48602	7.09819	8.40226	6.15661	5.41958	4.61369
A_23_P53126	0.0217945	0.565244	4.60463	up	NM_005574	chr11:33880302-33880243	LMO2	Homo sapiens LIM domain only 2 (rhombotin-like 1) (LMO2), transcript variant 1, mRNA [NM_005574]	GO:0005515|GO:0001102|GO:0005667|GO:0097067|GO:0048037|GO:0000977|GO:0001190|GO:0000981|GO:0043425|GO:0070888|GO:0005634|GO:0007275|GO:0001228|GO:0045647|GO:0045944|GO:0003682|GO:0008270|GO:0042789|GO:0035162	NM_005574	Hs.34560	4005	8342.62	1896.64	12.8917	10.6887	8193.7	5027.37	11806.8	2966.66	1873.06	850.197	12.8734	12.2637	13.5382	11.5321	10.659	9.87484
A_23_P369994	0.0124267	0.502357	4.60336	up	NM_004734	chr13:36345567-36345508	DCLK1	Homo sapiens doublecortin-like kinase 1 (DCLK1), transcript variant 1, mRNA [NM_004734]	GO:0048675|GO:0021952|GO:0007417|GO:0009615|GO:0005524|GO:0007399|GO:0035556|GO:0048813|GO:0004672|GO:0004674|GO:0005887|GO:0016197|GO:0006468|GO:0005057|GO:0030900|GO:0001764	NM_004734	Hs.507755	9201	1160.88	283.961	10.1179	7.91521	1168.57	1090.7	1223.38	494.363	229.289	128.23	10.0339	10.1016	10.2182	8.90184	7.62288	7.22091
A_33_P3292769	0.0021827	0.358224	4.51164	up	NM_145912	chr22:42776472-42776413	NFAM1	Homo sapiens NFAT activating protein with ITAM motif 1 (NFAM1), mRNA [NM_145912]	GO:0050853|GO:0045577|GO:0005886|GO:0009986|GO:0001819|GO:0050861|GO:0035556|GO:0007165|GO:0051091|GO:0006954|GO:0030183|GO:0045121|GO:0016021|GO:0004888	NM_145912	Hs.436677	150372	181.947	38.9853	7.4207	5.24705	163.175	128.279	254.387	48.9312	40.8346	27.1901	7.20855	7.10302	7.95054	5.52862	5.23203	4.9805
A_32_P194312	0.0206597	0.562512	4.47583	up	NM_001144952	chr17:71330743-71330684	SDK2	Homo sapiens sidekick cell adhesion molecule 2 (SDK2), mRNA [NM_001144952]	GO:0016021|GO:0007155	NM_001144952	Hs.435719	54549	259.494	64.9822	7.93206	5.7699	325.82	184.129	268.534	104.664	67.1084	23.1744	8.1812	7.59384	8.02113	6.6548	5.91023	4.74467
A_33_P3270668	0.00210962	0.358224	4.47272	up	NM_001031690	chr7:143051036-143050977	FAM131B	Homo sapiens family with sequence similarity 131, member B (FAM131B), transcript variant a, mRNA [NM_001031690]		NM_001031690	Hs.648908	9715	47.3535	11.4414	5.56021	3.39906	49.3795	43.0326	49.6485	18.0754	9.33243	6.91643	5.5043	5.53552	5.64082	3.99077	3.2148	2.99161
A_23_P326319	0.0228756	0.565244	4.4249	up	NM_033201	chr16:15681608-15681667	C16orf45	Homo sapiens chromosome 16 open reading frame 45 (C16orf45), transcript variant 1, mRNA [NM_033201]		NM_033201	Hs.401798	89927	336.589	87.8668	8.32217	6.17652	407.024	319.6	283.144	161.603	67.2737	34.7234	8.49422	8.37381	8.09846	7.29602	5.91344	5.32011
A_33_P3237379	0.0229214	0.565244	4.4093	up	NM_004976	chr11:17799241-17799300	KCNC1	Homo sapiens potassium voltage-gated channel, Shaw-related subfamily, member 1 (KCNC1), transcript variant B, mRNA [NM_004976]	GO:0005251|GO:0005886|GO:0008076|GO:0005249|GO:0007268|GO:0051260|GO:0006813	NM_004976	Hs.552896	3746	64.4912	17.0308	5.94977	3.80922	89.6694	45.4139	58.3902	33.0718	9.8379	8.18282	6.36771	5.61363	5.86797	4.91526	3.28299	3.22942
A_33_P3398156	0.0432474	0.61895	4.27462	up	NM_001037160	chr2:10197031-10196972	CYS1	Homo sapiens cystin 1 (CYS1), mRNA [NM_001037160]	GO:0005515|GO:0060170|GO:0048839|GO:0001822|GO:0045121|GO:0005932|GO:0035085	NM_001037160	Hs.27092	192668	110.603	23.9781	6.5099	4.4141	90.39	43.4703	197.95	32.9923	28.2156	10.7263	6.37807	5.55197	7.59965	4.9114	4.71205	3.61884
A_32_P108889	0.00767773	0.447429	4.23104	up	NM_004734	chr13:36343328-36343269	DCLK1	Homo sapiens doublecortin-like kinase 1 (DCLK1), transcript variant 1, mRNA [NM_004734]	GO:0048675|GO:0021952|GO:0007417|GO:0009615|GO:0005524|GO:0007399|GO:0035556|GO:0048813|GO:0004672|GO:0004674|GO:0005887|GO:0016197|GO:0006468|GO:0005057|GO:0030900|GO:0001764	NM_004734	Hs.507755	9201	133.799	34.6959	7.0385	4.95748	141.009	113.296	147.091	57.7997	27.9839	18.304	7.00614	6.92661	7.18274	5.76453	4.69993	4.40799
A_23_P425990	0.0257396	0.575877	4.23025	up	NM_001033602	chr13:30066785-30066844	MTUS2	Homo sapiens microtubule associated tumor suppressor candidate 2 (MTUS2), transcript variant 1, mRNA [NM_001033602]	GO:0008017|GO:0005515|GO:0005881|GO:0005813|GO:0042803	NM_001033602	Hs.22287	23281	25.2531	5	4.41021	2.32947	37.0858	8.58343	30.09	5	5	5	5.09129	3.21241	4.92694	2.32214	2.32967	2.3366
A_23_P156708	0.015425	0.531427	4.16663	up	NM_032470	chr6:32009022-32008964	TNXB	Homo sapiens tenascin XB (TNXB), transcript variant XB-S, mRNA [NM_032470]	GO:0030036|GO:0005518|GO:0005578|GO:0005583|GO:0005615|GO:0031012|GO:0005622|GO:0016337|GO:0005178|GO:0007160|GO:0030199|GO:0032963|GO:0006631|GO:0006641|GO:0043506|GO:0043206|GO:0007155|GO:0008201|GO:0048251	NM_032470	Hs.485104	7148	1494.94	398.128	10.4827	8.42379	1497.39	1468.44	1519	703.058	256.722	234.604	10.3888	10.5282	10.531	9.42062	7.77732	8.07342
A_24_P226970	0.00847321	0.458974	4.15	up	NM_014951	chr10:64161908-64161967	ZNF365	Homo sapiens zinc finger protein 365 (ZNF365), transcript variant A, mRNA [NM_014951]	GO:0005515|GO:0005737|GO:0005815	NM_014951	Hs.22653	22891	48.8943	12.9682	5.58897	3.53586	60.1355	45.0506	41.4968	22.3954	7.65706	8.85207	5.79077	5.6017	5.37443	4.32276	2.95632	3.32849
A_24_P297551	0.0136054	0.514471	4.13585	up	NM_178539	chr12:62102619-62102560	FAM19A2	Homo sapiens family with sequence similarity 19 (chemokine (C-C motif)-like), member A2 (FAM19A2), mRNA [NM_178539]	GO:0005737	NM_178539	Hs.269745	338811	650.094	150.253	9.18702	7.13884	545.816	408.017	996.449	224.933	130.619	95.207	8.92835	8.71123	9.92149	7.76474	6.84767	6.80412
A_23_P203439	0.0373103	0.608824	4.07135	up	NM_004976	chr11:17793938-17793997	KCNC1	Homo sapiens potassium voltage-gated channel, Shaw-related subfamily, member 1 (KCNC1), transcript variant B, mRNA [NM_004976]	GO:0005251|GO:0005886|GO:0008076|GO:0005249|GO:0007268|GO:0051260|GO:0006813	NM_004976	Hs.552896	3746	90.2443	24.5941	6.38662	4.36111	132.382	53.8933	84.4576	47.2144	11.5875	14.9804	6.92138	5.84525	6.39323	5.47364	3.5074	4.10229
A_23_P156327	0.00404081	0.388149	3.99507	up	NM_000358	chr5:135399343-135399402	TGFBI	Homo sapiens transforming growth factor, beta-induced, 68kDa (TGFBI), mRNA [NM_000358]	GO:0005886|GO:0008283|GO:0005578|GO:0050840|GO:0005576|GO:0001525|GO:0005615|GO:0031012|GO:0007162|GO:0005178|GO:0030198|GO:0007155|GO:0007601|GO:0050896|GO:0070062	NM_000358	Hs.369397	7045	500.131	122.249	8.86683	6.86861	508.762	358.383	633.246	173.19	107.526	86.0326	8.82433	8.52341	9.25276	7.39073	6.57167	6.64344
A_23_P64121	0.0286068	0.585277	3.98651	up	NM_012194	chr11:33695366-33695425	KIAA1549L	Homo sapiens KIAA1549-like (KIAA1549L), mRNA [NM_012194]	GO:0016021	NM_012194	Hs.502266	25758	52.476	14.0018	5.62917	3.63404	70.7879	55.6814	30.9588	23.7993	6.25656	11.9496	6.0242	5.89618	4.96713	4.41224	2.71771	3.77217
A_23_P11800	0.00176589	0.349948	3.94664	up	NM_018584	chr1:20809460-20809401	CAMK2N1	Homo sapiens calcium/calmodulin-dependent protein kinase II inhibitor 1 (CAMK2N1), mRNA [NM_018584]	GO:0030054|GO:0019901|GO:0045211|GO:0043025|GO:0008427|GO:0014069|GO:0030425	NM_018584	Hs.731383	55450	41.268	10.0531	5.28743	3.30681	57.0885	26.2075	40.5081	11.3828	9.54573	9.23087	5.71564	4.80695	5.3397	3.29169	3.24064	3.38809
A_24_P162173	0.00354963	0.377589	3.87494	up	NM_001149	chr10:61843293-61842480	ANK3	Homo sapiens ankyrin 3, node of Ranvier (ankyrin G) (ANK3), transcript variant 2, mRNA [NM_001149]	GO:0008092|GO:0007009|GO:0005515|GO:0072660|GO:2000651|GO:0005886|GO:0043001|GO:0072661|GO:0043266|GO:0007409|GO:0005764|GO:0019228|GO:0045184|GO:0043194|GO:0016323|GO:0009925|GO:0014704|GO:0007411|GO:0010765|GO:0045211|GO:0030674|GO:0045296|GO:0009986|GO:0000281|GO:0071709|GO:0030315|GO:0030507|GO:0033270|GO:0014731|GO:0072659|GO:0016328|GO:0044325|GO:0045838|GO:0042383|GO:0010628|GO:0007165|GO:…	NM_001149	Hs.499725	288	23.9506	6.65452	4.53785	2.58368	33.1105	19.4627	19.2786	9.96358	5	5	4.92562	4.38833	4.2996	3.08476	2.32967	2.3366
A_33_P3381338	0.0117904	0.496995	3.85332	up	NM_019105	chr6:32009196-32009137	TNXB	Homo sapiens tenascin XB (TNXB), transcript variant XB, mRNA [NM_019105]	GO:0030036|GO:0005518|GO:0005578|GO:0005583|GO:0005615|GO:0031012|GO:0005622|GO:0016337|GO:0005178|GO:0007160|GO:0030199|GO:0032963|GO:0006631|GO:0006641|GO:0043506|GO:0043206|GO:0007155|GO:0008201|GO:0048251	NM_019105	Hs.485104	7148	486.247	137.25	8.86583	6.91973	512.646	467.41	478.686	221.712	125.755	64.2826	8.83556	8.90513	8.85681	7.74317	6.7908	6.22522
A_33_P3386562	0.0101413	0.483318	3.80639	up	NM_032785	chr1:49511326-49511267	AGBL4	Homo sapiens ATP/GTP binding protein-like 4 (AGBL4), mRNA [NM_032785]	GO:0035610|GO:0015631|GO:0006508|GO:0008270|GO:0035609|GO:0005829|GO:0004181	NM_032785	Hs.679809	84871	21.0442	5	4.25789	2.32947	29.233	9.95519	23.9444	5	5	5	4.74532	3.42059	4.60777	2.32214	2.32967	2.3366
A_33_P3284132	0.00202603	0.358224	3.77474	up	NM_001004298	chr10:128192630-128192571	C10orf90	Homo sapiens chromosome 10 open reading frame 90 (C10orf90), mRNA [NM_001004298]	GO:0007095|GO:0030308|GO:0005813|GO:0005737|GO:0042826|GO:0010212|GO:0050821|GO:0015629|GO:0009411	NM_001004298	Hs.587663	118611	22.3525	5.82923	4.44568	2.5293	30.0923	19.223	17.7423	5	7.48769	5	4.78503	4.37225	4.17975	2.32214	2.92915	2.3366
A_33_P3244793	0.0422904	0.618136	3.70598	up	NM_207359	chr3:30767791-30767732	GADL1	Homo sapiens glutamate decarboxylase-like 1 (GADL1), mRNA [NM_207359]	GO:0030170|GO:0016831|GO:0019752	NM_207359	Hs.657052	339896	1419.91	440.686	10.3746	8.48473	1349.21	1036.46	1874.07	789.759	370.676	161.623	10.2529	10.027	10.8439	9.58985	8.31126	7.55307
A_33_P3234580	0.0429015	0.618417	3.69575	up	NM_000050	chr9:133376601-133376660	ASS1	Homo sapiens argininosuccinate synthase 1 (ASS1), transcript variant 1, mRNA [NM_000050]	GO:0005515|GO:0034641|GO:0005737|GO:0006526|GO:0000050|GO:0044281|GO:0005524|GO:0005829|GO:0004055	NM_000050	Hs.160786	445	59.3912	19.9146	5.86103	3.97516	74.9541	52.8924	50.3271	40.3308	11.1754	8.23771	6.10282	5.82086	5.65942	5.2307	3.45655	3.23824
A_24_P344961	0.0404965	0.617048	3.6674	up	NM_133265	chrX:112018573-112018514	AMOT	Homo sapiens angiomotin (AMOT), transcript variant 2, mRNA [NM_133265]	GO:0005515|GO:0030036|GO:0005884|GO:0030139|GO:0005829|GO:0042074|GO:0005737|GO:0006935|GO:0008180|GO:0040019|GO:0004872|GO:0034260|GO:0030334|GO:0051056|GO:0003365|GO:0001725|GO:0009986|GO:0035329|GO:0001726|GO:0001701|GO:0001702|GO:0030027|GO:0045793|GO:0043536|GO:0043534|GO:0043532|GO:0051496|GO:0016525|GO:0007043|GO:0005923|GO:0016021|GO:0034613|GO:0001570|GO:0043116|GO:0009897	NM_133265	Hs.528051	154796	733.31	235.655	9.44369	7.56893	698.961	633.875	867.094	460.276	138.915	107.773	9.29277	9.32753	9.71077	8.79546	6.93355	6.9778
A_33_P3418681	0.0267197	0.579398	3.64195	up	NM_005477	chr15:73612288-73612229	HCN4	Homo sapiens hyperpolarization activated cyclic nucleotide-gated potassium channel 4 (HCN4), mRNA [NM_005477]	GO:0005261|GO:0005886|GO:0005272|GO:0008015|GO:0005222|GO:0008016|GO:0007268|GO:0001701|GO:0042802|GO:0006936|GO:0030552|GO:0005887|GO:0043195|GO:0005249|GO:0042391|GO:0071805|GO:0006812	NM_005477	Hs.86941	10021	34.889	11.2618	5.11094	3.24623	39.6404	32.5914	32.4353	20.8058	5	7.97971	5.18099	5.12447	5.02736	4.20896	2.32967	3.20006
A_24_P355626	0.0324078	0.598405	3.63424	up	NM_022169	chr11:119033297-119033356	ABCG4	Homo sapiens ATP-binding cassette, sub-family G (WHITE), member 4 (ABCG4), transcript variant 1, mRNA [NM_022169]	GO:0005515|GO:0033344|GO:0046982|GO:0005886|GO:0017127|GO:0016021|GO:0055085|GO:0016887|GO:0005524|GO:0042803	NM_022169	Hs.126378	64137	185.729	55.2174	7.42936	5.5677	177.945	116.311	262.932	90.7957	51.8743	22.9822	7.32793	6.96477	7.99536	6.44234	5.52836	4.73241
A_23_P76136	0.0496291	0.626281	3.62675	up	NM_001080509	chr12:31149400-31149459	TSPAN11	Homo sapiens tetraspanin 11 (TSPAN11), mRNA [NM_001080509]	GO:0016021	NM_001080509	Hs.505141	441631	2983.83	811.636	11.3362	9.47757	2700.99	1464.43	4786.06	1354.31	619.244	461.349	11.2493	10.5241	12.2354	10.3718	9.03418	9.02676
A_23_P126844	0.00678869	0.434781	3.54067	up	NM_148965	chr1:6521304-6521245	TNFRSF25	Homo sapiens tumor necrosis factor receptor superfamily, member 25 (TNFRSF25), transcript variant 1, mRNA [NM_148965]	GO:0007165|GO:0005031|GO:0005886|GO:0005887|GO:0006915|GO:0042981|GO:0005576|GO:0004872|GO:0097190|GO:0033209|GO:0007166|GO:0005829	NM_148965	Hs.462529	8718	963.154	258.529	9.78347	7.95944	1046.37	579.796	1263.29	327.903	251.176	196.508	9.87405	9.21141	10.2649	8.31084	7.74548	7.82201
A_33_P3213665	0.0390669	0.61381	3.532	up	NR_038385	chr12:89406959-89406900	LOC728084	Homo sapiens uncharacterized LOC728084 (LOC728084), long non-coding RNA [NR_038385]		NR_038385	Hs.132563	728084	77.7123	22.1895	6.11193	4.29144	130.292	42.8135	60.031	36.6539	19.6363	10.2784	6.89976	5.52699	5.90904	5.08212	4.23881	3.55339
A_33_P3383975	2.12961e-05	0.0743026	3.53059	up		chr8:056047940-056047881							33.1367	9.3852	5.0292	3.20929	38.1935	28.0562	33.1605	10.2549	9.85707	8.04364	5.12706	4.90682	5.05372	3.12932	3.28754	3.21102
A_33_P3495783	0.0198331	0.553763	3.51084	up	AK126867	chr8:56454444-56454503		Homo sapiens cDNA FLJ44919 fis, clone BRAMY3010902. [AK126867]			Hs.103535		469.415	124.476	8.71152	6.89971	380.723	294.463	733.06	180.35	99.8739	93.2027	8.40508	8.2568	9.4727	7.4592	6.4682	6.77172
A_23_P904	0.0113817	0.495657	3.47468	up	NM_024603	chr1:49201921-49193667	BEND5	Homo sapiens BEN domain containing 5 (BEND5), mRNA [NM_024603]	GO:0005794	NM_024603	Hs.475348	79656	1188.84	364.66	10.1488	8.3519	1177.99	1089.64	1298.87	576.004	325.003	192.972	10.0411	10.0992	10.306	9.12414	8.12676	7.80481
A_33_P3218783	0.00505231	0.409392	3.44388	up	NM_001204404	chr10:61842434-61842375	ANK3	Homo sapiens ankyrin 3, node of Ranvier (ankyrin G) (ANK3), transcript variant 4, mRNA [NM_001204404]	GO:0008092|GO:0007009|GO:0005515|GO:0072660|GO:2000651|GO:0005886|GO:0043001|GO:0072661|GO:0043266|GO:0007409|GO:0005764|GO:0019228|GO:0045184|GO:0043194|GO:0016323|GO:0009925|GO:0014704|GO:0007411|GO:0010765|GO:0045211|GO:0030674|GO:0045296|GO:0009986|GO:0000281|GO:0071709|GO:0030315|GO:0030507|GO:0033270|GO:0014731|GO:0072659|GO:0016328|GO:0044325|GO:0045838|GO:0042383|GO:0010628|GO:0007165|GO:…	NM_001204404	Hs.499725	288	54.5269	16.4375	5.72947	3.94543	71.4476	48.4733	43.6599	24.3844	14.857	10.0712	6.0348	5.70606	5.44755	4.44999	3.86325	3.52305
A_24_P133253	0.0302936	0.592425	3.44342	up	NM_000899	chr12:88886712-88886653	KITLG	Homo sapiens KIT ligand (KITLG), transcript variant b, mRNA [NM_000899]	GO:0005515|GO:0033026|GO:0005886|GO:0008283|GO:0001755|GO:0050731|GO:0046579|GO:0005615|GO:0035234|GO:0005737|GO:0007173|GO:0043406|GO:0045636|GO:0007155|GO:0005856|GO:0035162|GO:0030097|GO:0048011|GO:0048015|GO:0045740|GO:0005576|GO:0005125|GO:0007165|GO:0008543|GO:0045087|GO:0002763|GO:0016021|GO:0008083|GO:0070668|GO:0005173|GO:0008584|GO:0038095	NM_000899	Hs.1048	4254	94.9985	27.986	6.44172	4.65788	143.556	54.8084	86.6309	48.358	18.8492	16.7508	7.0285	5.87326	6.42341	5.51241	4.18751	4.27371
A_24_P751074	0.0413572	0.617048	3.43182	up	NM_005238	chr11:128328679-128328656	ETS1	Homo sapiens v-ets avian erythroblastosis virus E26 oncogene homolog 1 (ETS1), transcript variant 2, mRNA [NM_005238]	GO:0005515|GO:0008284|GO:0070301|GO:0003700|GO:0008285|GO:0006366|GO:0030262|GO:0021983|GO:0005634|GO:0060206|GO:0010715|GO:0006955|GO:0005737|GO:0030578|GO:0048870|GO:0045944|GO:0032355|GO:0070555|GO:0046677|GO:0005667|GO:0001666|GO:0007565|GO:0060055|GO:0097194|GO:0045765|GO:0045786|GO:0021854|GO:0003677|GO:0045766|GO:0006351|GO:0009612|GO:0010595|GO:0043565|GO:0045648|GO:0034616|GO:0045893|GO:…	NM_005238	Hs.369438	2113	42.4997	14.9073	5.38354	3.60457	46.3028	49.0791	32.1171	29.2526	8.666	6.80327	5.4133	5.72108	5.01624	4.73003	3.11425	2.96941
A_33_P3363420	0.0374812	0.608824	3.43017	up	NM_174938	chr9:85862416-85862357	FRMD3	Homo sapiens FERM domain containing 3 (FRMD3), transcript variant 1, mRNA [NM_174938]	GO:0008092|GO:0005737|GO:0016021|GO:0005856|GO:0019898	NM_174938	Hs.127535	257019	2167.22	710.548	11.0119	9.23362	2364.44	1977.56	2159.67	1269.45	363.116	499.076	11.0635	10.9262	11.0459	10.2829	8.28638	9.13152
A_23_P213336	0.0370037	0.608824	3.42348	up	NM_000800	chr5:141974871-141974812	FGF1	Homo sapiens fibroblast growth factor 1 (acidic) (FGF1), transcript variant 1, mRNA [NM_000800]	GO:0005515|GO:0008286|GO:0008284|GO:0030324|GO:0001759|GO:0005615|GO:0009653|GO:0005829|GO:0034605|GO:0007173|GO:0045944|GO:0051781|GO:0005938|GO:0008201|GO:0050679|GO:0010740|GO:0048011|GO:0030335|GO:0060681|GO:0048015|GO:0005730|GO:0005578|GO:0005576|GO:0005104|GO:0007275|GO:0001525|GO:0045766|GO:0044548|GO:0007165|GO:0008543|GO:0045087|GO:0001934|GO:0030544|GO:0072163|GO:0008083|GO:0045542|GO:…	NM_000800	Hs.483635	2246	76.5492	24.5457	6.17019	4.39473	59.545	56.4808	113.622	28.6707	35.296	9.67027	5.77853	5.91786	6.8142	4.69714	5.02691	3.46014
A_24_P160413	0.0479266	0.626281	3.42152	up	NR_026850	chr1:32697338-32697279	MTMR9LP	Homo sapiens myotubularin related protein 9-like, pseudogene (MTMR9LP), non-coding RNA [NR_026850]		NR_026850	Hs.471067	339483	289.715	85.3475	8.00432	6.22969	427.941	293.301	147.904	144.755	70.683	40.6048	8.5692	8.2531	7.19068	7.14167	5.98465	5.56274
A_24_P941896	0.00022954	0.223601	3.41109	up	NM_017551	chr10:87360298-87360239	GRID1	Homo sapiens glutamate receptor, ionotropic, delta 1 (GRID1), mRNA [NM_017551]	GO:0030054|GO:0045211|GO:0005234|GO:0004970|GO:0016021	NM_017551	Hs.530653	2894	17.1792	5	4.0997	2.32947	15.7137	18.7506	17.0731	5	5	5	3.84439	4.32948	4.12523	2.32214	2.32967	2.3366
A_33_P3224730	0.0106932	0.488137	3.39159	up	XM_001726942	chr9:133309442-133309501		hemicentin 2 [Source:HGNC Symbol;Acc:21293] [ENST00000302481]		XM_001726942	Hs.32194		128.504	38.756	6.94064	5.17868	175.544	99.1572	110.812	60.9986	28.3329	26.9364	7.30711	6.73559	6.77922	5.85202	4.71754	4.96648
A_23_P1331	0.00469384	0.40383	3.36291	up	NM_080801	chr10:71718811-71718870	COL13A1	Homo sapiens collagen, type XIII, alpha 1 (COL13A1), transcript variant 5, mRNA [NM_080801]	GO:0005515|GO:0005886|GO:0005576|GO:0005600|GO:0030154|GO:0001958|GO:0016337|GO:0022617|GO:0007160|GO:0030198|GO:0005911|GO:0030574|GO:0005788|GO:0016021|GO:0008201|GO:0001763|GO:0005201	NM_080801	Hs.695934	1305	908.396	277.082	9.75975	8.01004	915.484	931.326	878.378	405.603	245.387	180.254	9.68304	9.86813	9.72809	8.61416	7.71509	7.70087
A_23_P303810	0.0168532	0.538202	3.34628	up	NM_153605	chr3:97663710-97663769	CRYBG3	Homo sapiens beta-gamma crystallin domain containing 3 (CRYBG3), mRNA [NM_153605]		NM_153605	Hs.733378	131544	875.646	274.57	9.67911	7.93655	1158.24	736.954	731.746	444.033	228.759	150.919	10.0184	9.54783	9.4711	8.74435	7.61851	7.44679
A_33_P3321007	0.00195596	0.354683	3.27847	up	NR_015374	chr8:65487033-65486974	LOC401463	Homo sapiens uncharacterized LOC401463 (LOC401463), long non-coding RNA [NR_015374]		NR_015374	Hs.651960	401463	17.0829	5.1232	4.04811	2.33509	17.6012	11.8154	21.8322	5.36962	5	5	4.00497	3.66022	4.47914	2.339	2.32967	2.3366
A_32_P40288	0.0247952	0.570825	3.27371	up	NM_052913	chr6:130763993-130764052	TMEM200A	Homo sapiens transmembrane protein 200A (TMEM200A), transcript variant 4, mRNA [NM_052913]	GO:0016021	NM_052913	Hs.591341	114801	635.878	181.738	9.12584	7.41491	977.618	586.675	343.34	250.814	182.686	111.714	9.78014	9.22823	8.36914	7.9181	7.30315	7.02347
A_33_P3363425	0.039367	0.61485	3.22675	up	NM_174938	chr9:85859651-85859592	FRMD3	Homo sapiens FERM domain containing 3 (FRMD3), transcript variant 1, mRNA [NM_174938]	GO:0008092|GO:0005737|GO:0016021|GO:0005856|GO:0019898	NM_174938	Hs.127535	257019	1055.95	362.11	9.97958	8.28949	1137.05	991.767	1039.04	633.355	185.797	267.179	9.99032	9.96182	9.98659	9.27318	7.33195	8.26334
A_24_P387321	0.0206656	0.562512	3.22597	up	NM_016264	chr19:12383626-12383567	ZNF44	Homo sapiens zinc finger protein 44 (ZNF44), transcript variant 2, mRNA [NM_016264]	GO:0006355|GO:0005737|GO:0015630|GO:0005730|GO:0005634|GO:0003677|GO:0046872|GO:0006351	NM_016264	Hs.296731	51710	101.254	34.7001	6.63235	4.94262	126.606	85.976	91.1794	59.8421	25.8626	18.3958	6.85695	6.53863	6.50148	5.81921	4.59399	4.41465
A_23_P154605	0.0397032	0.61485	3.22137	up	NM_018837	chr20:46286483-46286424	SULF2	Homo sapiens sulfatase 2 (SULF2), transcript variant 1, mRNA [NM_018837]	GO:0005795|GO:0005886|GO:0009986|GO:0051216|GO:0001822|GO:0005783|GO:0005509|GO:0048706|GO:0035860|GO:0030177|GO:0008449|GO:0032836|GO:0005615|GO:0010575|GO:0060384|GO:0060348|GO:0002063|GO:0003094|GO:0040037|GO:0004065|GO:0030201|GO:0014846	NM_018837	Hs.162016	55959	92.5226	24.3221	6.25314	4.56546	165.14	37.0587	75.3695	28.5532	26.4171	17.9959	7.22453	5.3077	6.22719	4.69263	4.62182	4.38195
A_33_P3209869	0.0392757	0.61485	3.15195	up	NM_018393	chr11:33094138-33094197	TCP11L1	Homo sapiens t-complex 11, testis-specific-like 1 (TCP11L1), transcript variant 1, mRNA [NM_018393]	GO:0005874	NM_018393	Hs.655341	55346	2655.65	941.187	11.2957	9.63946	2286.51	2457.27	3223.16	1658.57	712.359	452.632	11.0085	11.2434	11.6353	10.664	9.25554	8.99881
A_33_P3306898	0.0226198	0.565244	3.13756	up	NM_012194	chr11:33689641-33689700	KIAA1549L	Homo sapiens KIAA1549-like (KIAA1549L), mRNA [NM_012194]	GO:0016021	NM_012194	Hs.502266	25758	27.1971	9.7895	4.72799	3.07835	32.7823	29.5385	19.2704	15.2986	9.06989	5	4.90978	4.97594	4.29825	3.72362	3.17483	2.3366
A_23_P3312	0.0335125	0.599317	3.12799	up	NM_005545	chr15:74469121-74469180	ISLR	Homo sapiens immunoglobulin superfamily containing leucine-rich repeat (ISLR), transcript variant 1, mRNA [NM_005545]	GO:0005576|GO:0007155	NM_005545	Hs.745166	3671	1055.56	334.048	9.89388	8.24865	680.178	906.602	1579.91	481.902	342.647	177.594	9.2562	9.83546	10.59	8.86771	8.19973	7.67851
A_23_P156861	0.0155886	0.532628	3.1265	up	NM_012419	chr6:153332781-153332722	RGS17	Homo sapiens regulator of G-protein signaling 17 (RGS17), mRNA [NM_012419]	GO:0043547|GO:0005737|GO:0005886|GO:0038032|GO:0005634|GO:0005096	NM_012419	Hs.166313	26575	310.241	102.939	8.20911	6.56456	345.019	338.125	247.578	163.652	83.5816	61.583	8.2673	8.44928	7.91074	7.31412	6.20951	6.17004
A_24_P179585	0.0295509	0.590425	3.1244	up	NM_018650	chr1:220836938-220836997	MARK1	Homo sapiens MAP/microtubule affinity-regulating kinase 1 (MARK1), transcript variant 2, mRNA [NM_018650]	GO:0070300|GO:0000287|GO:0005886|GO:0050321|GO:0000226|GO:0005546|GO:0005524|GO:0007243|GO:0005737|GO:0004674|GO:0015630|GO:0007010|GO:0001786|GO:0006468|GO:0016055|GO:0001764|GO:0005856	NM_018650	Hs.497806	4139	22.3249	8.34401	4.43141	2.78783	30.7224	16.8677	19.3845	15.032	5	5	4.81938	4.16778	4.30708	3.69724	2.32967	2.3366
A_33_P3372979	0.0372075	0.608824	3.11775	up	NR_015451	chr11:33100907-33100966	LINC00294	Homo sapiens long intergenic non-protein coding RNA 294 (LINC00294), long non-coding RNA [NR_015451]		NR_015451	Hs.533701	283267	6954.75	2257.42	12.6356	10.9951	6171.65	4761.08	9931.53	3574.16	1557.79	1640.29	12.4468	12.1866	13.2734	11.8074	10.3931	10.7848
A_33_P3387110	0.00924108	0.479468	3.0948	up	NR_015419	chr15:57178455-57178396	LOC145783	Homo sapiens uncharacterized LOC145783 (LOC145783), long non-coding RNA [NR_015419]		NR_015419	Hs.620525	145783	16.287	5	3.95932	2.32947	11.109	15.3987	22.3533	5	5	5	3.32458	4.03784	4.51552	2.32214	2.32967	2.3366
A_33_P3431595	0.0180835	0.544273	3.07352	up	NM_173687	chr8:144134801-144134860	C8orf31	Homo sapiens chromosome 8 open reading frame 31 (C8orf31), mRNA [NM_173687]		NM_173687	Hs.660382	286122	2572.04	881.487	11.2553	9.63538	2516.1	2143.57	3056.45	1377.79	763.17	503.505	11.1505	11.0401	11.5751	10.3977	9.36183	9.14661
A_32_P74409	0.0199186	0.553877	3.07256	up	NM_001145033	chr11:43965338-43965397	C11orf96	Homo sapiens chromosome 11 open reading frame 96 (C11orf96), mRNA [NM_001145033]		NM_001145033	Hs.530443	387763	1146.5	389.133	10.0686	8.44919	1408.46	795.039	1236	550.177	430.256	186.966	10.3094	9.6584	10.2381	9.06582	8.52341	7.75835
A_32_P134007	0.0342565	0.59935	3.03255	up	NM_052898	chr8:56438571-56438630	XKR4	Homo sapiens XK, Kell blood group complex subunit-related family, member 4 (XKR4), mRNA [NM_052898]	GO:0016021	NM_052898	Hs.130197	114786	2123.16	717.79	10.9402	9.33966	2007.62	1429.09	2932.76	1154.74	540.974	457.659	10.829	10.4876	11.504	10.1534	8.85187	9.01372
A_23_P203773	0.007974	0.452629	3.01405	up	NM_080654	chr11:27371039-27370980	CCDC34	Homo sapiens coiled-coil domain containing 34 (CCDC34), transcript variant 2, mRNA [NM_080654]		NM_080654	Hs.143733	91057	259.24	87.4679	7.96586	6.37416	296.945	244.195	236.581	131.523	72.4873	58.3933	8.05189	7.998	7.84769	7.00942	6.023	6.09006
A_24_P784765	0.0156612	0.532628	3.01302	up	NM_203330	chr11:33724805-33724746	CD59	Homo sapiens CD59 molecule, complement regulatory protein (CD59), transcript variant 1, mRNA [NM_203330]	GO:0005515|GO:0030449|GO:0043066|GO:0001848|GO:0005886|GO:0009986|GO:0005576|GO:0005615|GO:0031362|GO:0042383|GO:0016020|GO:0007596|GO:0045087|GO:0043218|GO:0001971|GO:0042102|GO:0001775|GO:0007166	NM_203330	Hs.278573	966	190.553	66.1601	7.53724	5.94603	198.235	168.879	204.545	104.882	43.6316	49.9663	7.48544	7.48256	7.64373	6.65797	5.31121	5.8689
A_33_P3252939	0.0367588	0.608824	2.99701	up	NM_001012418	chr6:2664080-2664021	MYLK4	Homo sapiens myosin light chain kinase family, member 4 (MYLK4), mRNA [NM_001012418]	GO:0004674|GO:0005524	NM_001012418	Hs.127830	340156	26.4481	8.71119	4.59563	3.0121	23.7455	15.1365	40.4623	14.4557	5.20695	6.47092	4.43361	4.01577	5.33749	3.63674	2.49614	2.90342
A_24_P176079	0.00167377	0.349948	2.97225	up	NM_006646	chr13:27262694-27262753	WASF3	Homo sapiens WAS protein family, member 3 (WASF3), mRNA [NM_006646]	GO:0005737|GO:0006461|GO:0014003|GO:0008360|GO:0030032|GO:0007010|GO:0030041|GO:0003779|GO:0005856|GO:0030027|GO:0031643	NM_006646	Hs.618732	10810	633.353	207.162	9.22991	7.65835	748.632	499.446	651.98	169.991	236.108	215.386	9.39706	8.99143	9.30123	7.36423	7.65986	7.95097
A_23_P40096	0.0123263	0.502332	2.93869	up	NM_000312	chr2:128186633-128186692	PROC	Homo sapiens protein C (inactivator of coagulation factors Va and VIIIa) (PROC), mRNA [NM_000312]	GO:0005515|GO:0043066|GO:0004252|GO:0005886|GO:0005796|GO:0005509|GO:0005576|GO:0050900|GO:0017187|GO:0007596|GO:0030195|GO:0006508|GO:0005788|GO:0044267|GO:0043687	NM_000312	Hs.224698	5624	77.885	28.0726	6.24711	4.69194	97.9664	63.6878	72.0007	42.6572	25.9467	15.6139	6.48924	6.08886	6.16324	5.31715	4.59852	4.16014
A_33_P3406072	0.0441072	0.619509	2.91939	up	NM_001244959	chr9:85863178-85863119	FRMD3	Homo sapiens FERM domain containing 3 (FRMD3), transcript variant 2, mRNA [NM_001244959]	GO:0008092|GO:0005737|GO:0016021|GO:0005856|GO:0019898	NM_001244959	Hs.127535	257019	205.925	80.2626	7.64501	6.09934	219.754	197.637	200.385	147.074	51.4643	42.2497	7.62128	7.69556	7.61818	7.16228	5.51503	5.62071
A_23_P19182	0.00762008	0.447429	2.88911	up	NM_016606	chr5:137782577-137782636	REEP2	Homo sapiens receptor accessory protein 2 (REEP2), transcript variant 2, mRNA [NM_016606]	GO:0005881|GO:0050913|GO:0005887|GO:0031883|GO:0050916|GO:0032596	NM_016606	Hs.416090	51308	7544.69	2593.23	12.8038	11.2732	7326.02	5960.94	9347.11	3363.34	2269.79	2146.57	12.7096	12.5104	13.1915	11.7208	10.9447	11.1542
A_23_P315571	0.00306237	0.367592	2.88393	up	NM_015150	chr3:16357514-16357455	RFTN1	Homo sapiens raftlin, lipid raft linker 1 (RFTN1), mRNA [NM_015150]	GO:0003725|GO:0043234|GO:0005737|GO:0005886|GO:0045121|GO:0043330|GO:0034138|GO:0033227|GO:0005768	NM_015150	Hs.98910	23180	780.344	256.266	9.50013	7.9721	987.2	515.889	837.943	259.082	274.18	235.537	9.7938	9.04438	9.66223	7.96811	7.86956	8.07864
A_33_P3238171	0.0362391	0.606354	2.87316	up	NM_013373	chr22:20135467-20135526	ZDHHC8	Homo sapiens zinc finger, DHHC-type containing 8 (ZDHHC8), transcript variant 2, mRNA [NM_013373]	GO:0005739|GO:0007610|GO:0008270|GO:0016021|GO:0030659|GO:0019706	NM_013373	Hs.63128	29801	559.314	205.844	9.0285	7.50586	510.241	426.614	741.087	331.019	189.311	97.2013	8.83157	8.77149	9.48244	8.3245	7.3533	6.83979
A_23_P128574	0.00931749	0.479468	2.86764	up	NM_017993	chr13:43787918-43787859	ENOX1	Homo sapiens ecto-NOX disulfide-thiol exchanger 1 (ENOX1), transcript variant 1, mRNA [NM_017993]	GO:0005886|GO:0000166|GO:0016491|GO:0048511|GO:0003676|GO:0005615	NM_017993	Hs.128258	55068	1062.69	379.291	9.98153	8.46166	1272.5	911.19	1004.38	554.915	341.998	240.961	10.1669	9.84106	9.9366	9.07713	8.19552	8.11233
A_23_P99942	0.0336336	0.599317	2.86347	up	NM_024652	chr15:101609711-101609770	LRRK1	Homo sapiens leucine-rich repeat kinase 1 (LRRK1), mRNA [NM_024652]	GO:0005739|GO:0005515|GO:0005737|GO:0007264|GO:0004674|GO:0005525|GO:0005524|GO:0046872|GO:0042802	NM_024652	Hs.407918	79705	113.417	44.1263	6.7956	5.27784	138.417	103.574	98.2606	75.0232	36.5151	20.8405	6.9852	6.79727	6.60434	6.16511	5.07506	4.59334
A_33_P3379381	0.0168931	0.538202	2.84555	up	NM_207014	chr1:67337127-67337068	WDR78	Homo sapiens WD repeat domain 78 (WDR78), transcript variant 2, mRNA [NM_207014]		NM_207014	Hs.49421	79819	83.1946	29.5122	6.33269	4.82398	59.0043	85.307	105.272	42.8946	24.5365	21.1056	5.76532	6.53011	6.70262	5.32499	4.53212	4.61482
A_23_P420293	0.0380012	0.608824	2.82325	up	NM_145013	chr11:128769709-128769650	C11orf45	Homo sapiens chromosome 11 open reading frame 45 (C11orf45), transcript variant 2, mRNA [NM_145013]	GO:0005576	NM_145013	Hs.689860	219833	20.004	8.23586	4.27428	2.77693	24.6842	13.5531	21.7746	14.7076	5	5	4.49089	3.8551	4.47686	3.66452	2.32967	2.3366
A_33_P3227472	0.0412817	0.617048	2.80367	up	NM_138432	chr12:113876021-113876080	SDSL	Homo sapiens serine dehydratase-like (SDSL), mRNA [NM_138432]	GO:0005739|GO:0003941|GO:0008150|GO:0006520|GO:0003674|GO:0030170|GO:0005575|GO:0004794	NM_138432	Hs.337594	113675	508.231	200.898	8.91949	7.43217	565.878	404.152	554.663	340.893	172.114	89.6859	8.98748	8.69735	9.07364	8.36469	7.21691	6.71492
A_23_P146066	0.0141647	0.517599	2.79596	up	NM_003114	chr8:101252969-101253147	SPAG1	Homo sapiens sperm associated antigen 1 (SPAG1), transcript variant 1, mRNA [NM_003114]	GO:0007338|GO:0005737|GO:0016787|GO:0005525	NM_003114	Hs.591866	6674	30.379	11.5354	4.88313	3.39978	40.2053	24.4331	26.4986	17.9851	10.2823	6.33879	5.20056	4.70766	4.74116	3.98173	3.33663	2.88099
A_23_P119478	0.0438373	0.619509	2.77603	up	NM_005755	chr19:4237260-4237319	EBI3	Homo sapiens Epstein-Barr virus induced 3 (EBI3), mRNA [NM_005755]	GO:0005515|GO:0004896|GO:0005886|GO:0045078|GO:0006959|GO:0019221|GO:0046641|GO:0045523|GO:0042088|GO:0005615|GO:0005125	NM_005755	Hs.501452	10148	219.514	86.6922	7.71561	6.24259	196.625	188.758	273.16	139.95	82.3507	37.7765	7.47131	7.62647	8.04905	7.09269	6.19064	5.44443
A_23_P75310	0.00485406	0.408689	2.76827	up	NM_021226	chr10:49654256-49654197	ARHGAP22	Homo sapiens Rho GTPase activating protein 22 (ARHGAP22), transcript variant 3, mRNA [NM_021226]	GO:0005515|GO:0051056|GO:0006355|GO:0005543|GO:0007264|GO:0005634|GO:0001525|GO:0030154|GO:0006351|GO:0005829|GO:0005096	NM_021226	Hs.655672	58504	80.7421	31.0448	6.32779	4.85881	75.691	82.6147	83.9207	31.2541	42.6452	19.2351	6.11284	6.48649	6.38404	4.82501	5.28206	4.46935
A_33_P3531373	0.00275544	0.364951	2.75651	up	XR_252283	chr7:106423149-106423208		PREDICTED: Homo sapiens uncharacterized LOC340340 (LOC340340), misc_RNA [XR_252283]		XR_252283	Hs.649292		38.6752	14.2484	5.24369	3.78084	48.4402	36.9089	30.6763	19.383	12.9128	10.4495	5.47455	5.30188	4.95463	4.09912	3.6664	3.577
A_23_P103011	0.0137568	0.514782	2.75125	up	NM_004914	chr22:23506428-23506487	RAB36	Homo sapiens RAB36, member RAS oncogene family (RAB36), mRNA [NM_004914]	GO:0005794|GO:0000139|GO:0007264|GO:0015031|GO:0005525	NM_004914	Hs.369557	9609	523.388	184.926	8.93648	7.47639	628.536	572.612	369.016	250.593	147.678	156.508	9.13813	9.19012	8.48118	7.91566	7.00645	7.50706
A_23_P374689	0.02654	0.579398	2.75101	up	NM_000817	chr2:171717173-171717232	GAD1	Homo sapiens glutamate decarboxylase 1 (brain, 67kDa) (GAD1), transcript variant GAD67, mRNA [NM_000817]	GO:0005515|GO:0012506|GO:0046982|GO:0005886|GO:0042493|GO:0006538|GO:0007268|GO:0018352|GO:0007269|GO:0005622|GO:0047485|GO:0004351|GO:0030170|GO:0061202|GO:0042136|GO:0016595|GO:0006540|GO:0009449	NM_000817	Hs.420036	2571	31.917	11.4311	4.93731	3.47735	21.333	35.7953	38.6227	11.9034	8.42505	13.9648	4.28306	5.25911	5.26978	3.35968	3.07562	3.99676
A_32_P188860	0.00244036	0.36105	2.7394	up	NM_017563	chr3:57124128-57124069	IL17RD	Homo sapiens interleukin 17 receptor D (IL17RD), mRNA [NM_017563]	GO:0007165|GO:0005886|GO:0000139|GO:0016021	NM_017563	Hs.150725	54756	1279.06	465.132	10.2572	8.80335	1385.91	1140.86	1310.42	604.336	423.096	367.966	10.2904	10.1607	10.3205	9.201	8.49849	8.71057
A_32_P217390	0.0436766	0.619509	2.72595	up	NM_173499	chr15:97328649-97328708	SPATA8	Homo sapiens spermatogenesis associated 8 (SPATA8), mRNA [NM_173499]		NM_173499	Hs.326528	145946	118.549	46.726	6.80353	5.35677	133.394	71.7999	150.453	43.8312	74.8211	21.5256	6.93046	6.26887	7.21126	5.36153	6.0667	4.64208
A_24_P98047	0.021483	0.565244	2.71527	up	NM_018593	chr6:111543660-111543716	SLC16A10	Homo sapiens solute carrier family 16 (aromatic amino acid transporter), member 10 (SLC16A10), mRNA [NM_018593]	GO:0016323|GO:0015801|GO:0005886|GO:0006865|GO:0016021|GO:0055085|GO:0006811	NM_018593	Hs.591327	117247	96.4768	37.6628	6.54859	5.10749	128.931	83.2234	77.2757	52.1328	42.0003	18.8554	6.88554	6.4946	6.26561	5.61701	5.26603	4.43942
A_33_P3842551	0.0103286	0.484805	2.69795	up	NM_001079526	chr2:213870837-213870778	IKZF2	Homo sapiens IKAROS family zinc finger 2 (Helios) (IKZF2), transcript variant 2, mRNA [NM_001079526]	GO:0005515|GO:0008150|GO:0003674|GO:0046982|GO:0045944|GO:0005634|GO:0003677|GO:0046872|GO:0042803|GO:0006351	NM_001079526	Hs.604950	22807	32.7261	12.3421	5.00965	3.57778	38.6477	31.9549	27.5757	13.7376	8.40745	14.8812	5.1414	5.09396	4.79358	3.56887	3.07235	4.09213
A_33_P3313801	0.0164674	0.538202	2.69345	up	NM_080654	chr11:27371878-27371819	CCDC34	Homo sapiens coiled-coil domain containing 34 (CCDC34), transcript variant 2, mRNA [NM_080654]		NM_080654	Hs.143733	91057	234.35	90.0671	7.81519	6.38574	276.063	207.523	219.464	139.021	78.6983	52.4819	7.94412	7.76235	7.7391	7.08439	6.1325	5.94032
A_33_P3317618	0.025364	0.574608	2.6927	up	NM_003178	chr3:12227160-12227219	SYN2	Homo sapiens synapsin II (SYN2), transcript variant IIb, mRNA [NM_003178]	GO:0030054|GO:0007268|GO:0003824|GO:0005524|GO:0007269|GO:0008021	NM_003178	Hs.445503	6854	56.6061	19.7329	5.71764	4.28859	51.456	34.5773	83.785	21.9011	15.296	22.0016	5.56139	5.2113	6.38023	4.28469	3.90827	4.6728
A_23_P372308	0.0396573	0.61485	2.66973	up	NM_020211	chr15:93586835-93586776	RGMA	Homo sapiens repulsive guidance molecule family member a (RGMA), transcript variant 4, mRNA [NM_020211]	GO:0005886|GO:0007411|GO:0005783|GO:0031225	NM_020211	Hs.271277	56963	535.681	221.631	8.99454	7.57785	569.819	435.411	601.812	265.58	312.396	86.915	8.99881	8.80091	9.18391	8.00038	8.07029	6.66288
A_24_P166397	0.0317387	0.596899	2.66479	up	NM_014809	chr6:24544895-24544836	KIAA0319	Homo sapiens KIAA0319 (KIAA0319), transcript variant 1, mRNA [NM_014809]	GO:0005515|GO:0005886|GO:0031901|GO:0016021|GO:0001764|GO:2000171|GO:0005769	NM_014809	Hs.26441	9856	23.1391	8.43057	4.45329	3.03927	32.2523	23.1139	14.051	9.22941	5.4901	10.5722	4.88914	4.63237	3.83837	2.96459	2.55902	3.5942
A_33_P3332937	0.010892	0.491655	2.65529	up	BX648740	chr13:21875951-21876010	MIPEPP3	Homo sapiens mRNA; cDNA DKFZp686C1238 (from clone DKFZp686C1238). [BX648740]			Hs.147563	650794	92.1711	34.8663	6.48871	5.07984	69.1478	95.6339	111.732	46.5953	32.8443	25.1592	5.99142	6.68425	6.79045	5.45573	4.92179	4.86199
A_33_P3369716	0.000878891	0.304151	2.64778	up	XR_246000	chr12:68825700-68825641	LOC100507195	PREDICTED: Homo sapiens uncharacterized LOC101927981 (LOC101927981), misc_RNA [XR_246000]		XR_246000		100507195	15.4813	6.00779	3.92148	2.51669	19.4777	14.0786	12.8875	7.17437	5.84901	5	4.14973	3.9077	3.70699	2.57238	2.64111	2.3366
A_23_P32165	0.039619	0.61485	2.64503	up	NM_004789	chr9:126795257-126795316	LHX2	Homo sapiens LIM homeobox 2 (LHX2), mRNA [NM_004789]	GO:0003700|GO:0001843|GO:0005634|GO:0009953|GO:0021978|GO:2000678|GO:0043565|GO:0001076|GO:0007411|GO:0045944|GO:0007498|GO:0008270|GO:0045893	NM_004789	Hs.696425	9355	422.892	156.142	8.62111	7.21782	407.432	297.568	563.676	204.118	96.9939	167.314	8.49535	8.2715	9.09647	7.63413	6.42587	7.59347
A_23_P17503	0.0226722	0.565244	2.61035	up	NM_024704	chr20:16253014-16252955	KIF16B	Homo sapiens kinesin family member 16B (KIF16B), transcript variant 2, mRNA [NM_024704]	GO:0001704|GO:0008017|GO:0017137|GO:0005871|GO:0043325|GO:0005874|GO:0080025|GO:0005547|GO:0032266|GO:0045022|GO:0005524|GO:0006895|GO:0001919|GO:0007173|GO:0007492|GO:0008543|GO:0032801|GO:0031901|GO:0008574|GO:0005769|GO:0005768|GO:0007018	NM_024704	Hs.101774	55614	94.5345	39.0624	6.54303	5.15878	88.433	81.6039	113.567	57.4439	39.8315	19.9117	6.34915	6.46702	6.81291	5.75742	5.1995	4.51943
A_33_P3286352	0.0338297	0.599317	2.60361	up	NR_027428	chr10:81813290-81813231	TMEM254-AS1	Homo sapiens TMEM254 antisense RNA 1 (TMEM254-AS1), transcript variant 1, long non-coding RNA [NR_027428]		NR_027428	Hs.524453	219347	17.4052	7.6393	4.09538	2.71487	15.2162	14.8944	22.1051	12.9179	5	5	3.79593	3.99167	4.49854	3.47833	2.32967	2.3366
A_23_P142872	0.00849464	0.458974	2.60126	up	NM_031283	chr2:85536678-85536737	TCF7L1	Homo sapiens transcription factor 7-like 1 (T-cell specific, HMG-box) (TCF7L1), mRNA [NM_031283]	GO:0048319|GO:0046022|GO:0005667|GO:0006355|GO:0003700|GO:0044212|GO:0006357|GO:0008013|GO:0030111|GO:0048699|GO:0006325|GO:0005634|GO:0003677|GO:2000036|GO:0006351|GO:0043565|GO:0007420|GO:0003682|GO:0043588|GO:0008595|GO:0060070|GO:0045892|GO:0035019	NM_031283	Hs.516297	83439	1112.11	430.072	10.0458	8.66663	1188.68	913.791	1233.86	599.411	380.658	310.147	10.0569	9.8454	10.2352	9.18819	8.35044	8.46126
A_23_P6099	0.0406698	0.617048	2.59231	up	NM_015192	chr20:8755212-8755271	PLCB1	Homo sapiens phospholipase C, beta 1 (phosphoinositide-specific) (PLCB1), transcript variant 1, mRNA [NM_015192]	GO:0005516|GO:0000790|GO:0021987|GO:1900087|GO:0043647|GO:0046330|GO:0007268|GO:2000438|GO:0005634|GO:0032735|GO:0044281|GO:0042803|GO:0005829|GO:0035556|GO:0005737|GO:0000086|GO:0040019|GO:0035723|GO:0045444|GO:0007613|GO:0004871|GO:2000560|GO:0070498|GO:0005521|GO:0035722|GO:0031965|GO:0080154|GO:0046488|GO:0005509|GO:0005546|GO:0007215|GO:0007213|GO:2000344|GO:0043547|GO:0016042|GO:0007165|GO:…	NM_015192	Hs.431173	23236	287.466	114.026	8.06417	6.68993	400.782	246.691	214.925	179.851	104.113	58.1138	8.4746	8.01055	7.70737	7.45399	6.53174	6.08407
A_23_P357284	0.0321184	0.597862	2.58148	up	NM_005282	chr19:46093270-46093211	GPR4	Homo sapiens G protein-coupled receptor 4 (GPR4), mRNA [NM_005282]	GO:0007186|GO:0005886|GO:0005887|GO:0004930	NM_005282	Hs.17170	2828	16.5655	6.78914	3.97216	2.60397	13.4725	11.9951	24.229	10.3674	5	5	3.61125	3.68134	4.62389	3.14563	2.32967	2.3366
A_33_P3254590	0.0097141	0.479468	2.56954	up	NR_033868	chr11:43283141-43283082	HNRNPKP3	Homo sapiens heterogeneous nuclear ribonucleoprotein K pseudogene 3 (HNRNPKP3), non-coding RNA [NR_033868]		NR_033868	Hs.446761	399881	15.0606	6.16962	3.86174	2.50022	17.721	9.7212	17.7396	8.50887	5	5	4.01691	3.38897	4.17933	2.83441	2.32967	2.3366
A_23_P115785	0.0349345	0.601645	2.55143	up	NM_145235	chr10:127697791-127697956	FANK1	Homo sapiens fibronectin type III and ankyrin repeat domains 1 (FANK1), mRNA [NM_145235]	GO:0005737|GO:0005730|GO:0005634	NM_145235	Hs.352591	92565	41.2041	16.7015	5.29288	3.94157	35.3803	29.8933	58.3387	25.9859	14.5327	9.58608	5.02203	4.98969	5.86692	4.54293	3.83559	3.4462
A_33_P3220738	0.0336953	0.599317	2.5405	up	NM_207108	chr1:176838044-176837985	ASTN1	Homo sapiens astrotactin 1 (ASTN1), transcript variant 2, mRNA [NM_207108]	GO:0016477|GO:0007626|GO:0016021|GO:0005575|GO:0001764|GO:0009897|GO:0007158|GO:0005768	NM_207108	Hs.495897	460	24.6815	10.0965	4.57062	3.22551	25.1549	32.2762	16.6135	16.2941	7.0856	6.90986	4.51737	5.10964	4.08484	3.82503	2.86095	2.99054
A_23_P166508	0.00884099	0.468386	2.53917	up	BC038245	chr22:42760626-42760567		Homo sapiens, clone IMAGE:5241654, mRNA. [BC038245]			Hs.335413		2472.38	982.68	11.202	9.8576	2329.66	2250.04	2837.45	1324.59	968.394	655.056	11.0411	11.1056	11.4592	10.3433	9.71848	9.51108
A_33_P3278313	0.00589635	0.421984	2.5315	up	NM_001193460	chr12:65860358-65860417	MSRB3	Homo sapiens methionine sulfoxide reductase B3 (MSRB3), transcript variant 3, mRNA [NM_001193460]	GO:0005739|GO:0005783|GO:0030091|GO:0033743|GO:0008270	NM_001193460	Hs.339024	253827	657.581	254.11	9.27465	7.93465	825.616	526.923	620.204	333.984	229.451	198.895	9.52738	9.07191	9.22465	8.33943	7.62377	7.84076
A_23_P310460	0.0453272	0.621585	2.51956	up	NM_153487	chr6:37600354-37600295	MDGA1	Homo sapiens MAM domain containing glycosylphosphatidylinositol anchor 1 (MDGA1), mRNA [NM_153487]	GO:0003674|GO:0007420|GO:0001764|GO:0046658|GO:0021527	NM_153487	Hs.437993	266727	99.2653	38.9802	6.51578	5.18261	121.564	53.0628	123.169	55.8305	39.4905	21.6194	6.79727	5.82466	6.92542	5.71315	5.18661	4.64808
A_23_P57277	0.0112569	0.495657	2.5168	up	NM_020152	chr21:30547359-30547418	MAP3K7CL	Homo sapiens MAP3K7 C-terminal like (MAP3K7CL), transcript variant 1, mRNA [NM_020152]	GO:0005515|GO:0005634|GO:0005829	NM_020152	Hs.222802	56911	14.4541	5.34531	3.79601	2.46441	17.0932	8.89941	17.3697	5.3762	5	5.65973	3.96899	3.2672	4.15184	2.33928	2.32967	2.72429
A_24_P88801	0.0158843	0.533486	2.50374	up	NM_000272	chr2:110881447-110881388	NPHP1	Homo sapiens nephronophthisis 1 (juvenile) (NPHP1), transcript variant 1, mRNA [NM_000272]	GO:0005515|GO:0007588|GO:0030036|GO:0060041|GO:0031514|GO:0007632|GO:0048515|GO:0035085|GO:0035845|GO:0007165|GO:0016337|GO:0005912|GO:0016020|GO:0005198|GO:0005911|GO:0030030|GO:0032391|GO:0034613|GO:0005923|GO:0005856	NM_000272	Hs.280388	4867	94.2052	37.1823	6.49406	5.16998	84.6276	69.1436	128.845	51.1997	32.5749	27.7724	6.2783	6.20887	6.99502	5.59243	4.90942	5.00808
A_33_P3276997	0.0101935	0.484001	2.49608	up	NM_207577	chr11:75313987-75313928	MAP6	Homo sapiens microtubule-associated protein 6 (MAP6), transcript variant 2, mRNA [NM_207577]	GO:0008017|GO:0005516|GO:0048471|GO:0005794|GO:0005874|GO:0000226	NM_207577	Hs.585540	4135	25.1834	10.244	4.61918	3.29952	33.4454	22.3655	19.7394	14.1715	7.03474	9.52569	4.93881	4.5809	4.33784	3.60836	2.85136	3.43884
A_23_P30315	0.0120307	0.496995	2.48772	up	NM_033342	chr5:180630267-180630208	TRIM7	Homo sapiens tripartite motif containing 7 (TRIM7), transcript variant 6, mRNA [NM_033342]	GO:0005737|GO:0005730|GO:0008270|GO:0005634|GO:0043231	NM_033342	Hs.487412	81786	911.256	367.932	9.74387	8.42904	786.35	1146.84	800.58	385.363	491.603	226.831	9.46257	10.169	9.60007	8.54143	8.72311	8.02258
A_33_P3341299	0.00902692	0.47559	2.48154	up	NM_014405	chr17:65028139-65028198	CACNG4	Homo sapiens calcium channel, voltage-dependent, gamma subunit 4 (CACNG4), mRNA [NM_014405]	GO:0030666|GO:0051899|GO:0005886|GO:0005245|GO:0005887|GO:0032281|GO:2000311|GO:0006810|GO:0007268|GO:0005891	NM_014405	Hs.514423	27092	38.798	15.8715	5.24194	3.93071	47.2595	41.4027	27.7318	18.5046	18.4854	10.6245	5.44404	5.47845	4.80335	4.02823	4.16074	3.60317
A_33_P3302777	0.0260432	0.576977	2.48	up	NM_004734	chr13:36686066-36686007	DCLK1	Homo sapiens doublecortin-like kinase 1 (DCLK1), transcript variant 1, mRNA [NM_004734]	GO:0048675|GO:0021952|GO:0007417|GO:0009615|GO:0005524|GO:0007399|GO:0035556|GO:0048813|GO:0004672|GO:0004674|GO:0005887|GO:0016197|GO:0006468|GO:0005057|GO:0030900|GO:0001764	NM_004734	Hs.507755	9201	184.139	78.5432	7.48538	6.17504	198.851	192.068	161.499	119.911	73.7768	41.942	7.48832	7.65309	7.31474	6.86397	6.04979	5.61137
A_33_P3266010	0.0394761	0.61485	2.47914	up	NM_004292	chr11:66099619-66099560	RIN1	Homo sapiens Ras and Rab interactor 1 (RIN1), mRNA [NM_004292]	GO:0005515|GO:0007165|GO:0005737|GO:0005886|GO:0005856|GO:0006897|GO:0005096	NM_004292	Hs.1030	9610	3032.35	1291.46	11.4948	10.1849	2838.17	3455.92	2802.96	2088.96	984.889	800.527	11.3212	11.7249	11.4382	11.0206	9.74624	9.78787
A_23_P403398	0.0237646	0.565244	2.47354	up	NR_002186	chr7:30411448-30411507	DKFZP586I1420	Homo sapiens uncharacterized protein DKFZp586I1420 (DKFZP586I1420), non-coding RNA [NR_002186]		NR_002186	Hs.112423	222161	404.983	170.521	8.59205	7.28547	433.868	370.093	410.987	268.871	143.164	99.5286	8.59092	8.56967	8.61556	8.01884	6.96477	6.8728
A_23_P113393	0.019742	0.553763	2.46806	up	NM_017413	chrX:128779470-128779411	APLN	Homo sapiens apelin (APLN), mRNA [NM_017413]	GO:0048471|GO:0008284|GO:0005102|GO:0005576|GO:0045776|GO:0005615|GO:0031704|GO:0007165|GO:0043576|GO:0006955|GO:0005179|GO:0007595|GO:0045906|GO:0002026|GO:0042756|GO:0045909|GO:0051461|GO:0031652|GO:0051466|GO:0042327	NM_017413	Hs.303084	8862	326.416	132.035	8.27109	6.96771	312.944	405.091	261.214	180.096	136.675	79.3346	8.12493	8.7024	7.98593	7.45686	6.91369	6.53258
A_33_P3325502	0.0141076	0.517015	2.45337	up	NM_004815	chr1:94634524-94634465	ARHGAP29	Homo sapiens Rho GTPase activating protein 29 (ARHGAP29), mRNA [NM_004815]	GO:0051056|GO:0032321|GO:0007264|GO:0007266|GO:0046872|GO:0005100|GO:0005829	NM_004815	Hs.483238	9411	23.8565	9.85949	4.52855	3.23379	28.3329	16.6134	26.6233	14.2653	6.6009	8.7123	4.69263	4.14719	4.74584	3.61823	2.7779	3.30523
A_33_P3292840	0.0412678	0.617048	2.4411	up	NM_001003678	chr11:47185868-47185927	C11orf49	Homo sapiens chromosome 11 open reading frame 49 (C11orf49), transcript variant 4, mRNA [NM_001003678]	GO:0005730|GO:0005634	NM_001003678	Hs.368296	79096	290.83	123.974	8.11654	6.82901	264.11	247.452	360.928	201.251	88.7536	81.9159	7.89204	8.01459	8.44299	7.61381	6.29756	6.57565
A_33_P3302453	0.011434	0.495657	2.4404	up	NR_026781	chr6:170189004-170188945	LINC00242	Homo sapiens long intergenic non-protein coding RNA 242 (LINC00242), long non-coding RNA [NR_026781]		NR_026781	Hs.556095	401288	14.2642	5.36095	3.77733	2.49022	18.8384	9.16872	14.7855	5	5	6.08285	4.10624	3.31079	3.91497	2.32214	2.32967	2.81884
A_24_P316430	0.00937088	0.479468	2.43533	up	NM_002526	chr6:86176992-86181005	NT5E	Homo sapiens 5'-nucleotidase, ecto (CD73) (NT5E), transcript variant 1, mRNA [NM_002526]	GO:0005886|GO:0055086|GO:0006259|GO:0031225|GO:0044281|GO:0046086|GO:0046872|GO:0006196|GO:0046135|GO:0005737|GO:0006195|GO:0000166|GO:0016020|GO:0006144|GO:0050728|GO:0008253|GO:0006206|GO:0070062	NM_002526	Hs.153952	4907	353.961	147.982	8.40623	7.12211	391.936	317.636	352.311	202.714	152.823	88.4097	8.4456	8.3658	8.40728	7.62457	7.05489	6.68687
A_24_P339429	0.0489643	0.626281	2.42787	up	NM_021012	chr17:21323091-21323150	KCNJ12	Homo sapiens potassium inwardly-rectifying channel, subfamily J, member 12 (KCNJ12), mRNA [NM_021012]	GO:0005242|GO:0006936|GO:0005886|GO:0051289|GO:0008016|GO:0007268|GO:0031224|GO:0016021|GO:0006813	NM_021012	Hs.200629	3768	780.694	334.776	9.52092	8.24123	670.388	986.363	685.33	539.018	255.878	209.432	9.23479	9.95621	9.37176	9.03804	7.77186	7.91379
A_24_P366607	0.00257142	0.36105	2.41174	up	NM_203451	chr13:37271323-37271382	SERTM1	Homo sapiens serine-rich and transmembrane domain containing 1 (SERTM1), mRNA [NM_203451]	GO:0016021	NM_203451	Hs.422375	400120	1682.46	694.551	10.6526	9.38248	1915.19	1454.58	1677.62	860.246	656.922	566.486	10.7645	10.5155	10.6777	9.71527	9.12367	9.3085
A_32_P226186	0.0114174	0.495657	2.41118	up	NM_001164665	chr7:138516363-138516304	KIAA1549	Homo sapiens KIAA1549 (KIAA1549), transcript variant 2, mRNA [NM_001164665]	GO:0016021	NM_001164665	Hs.605380	57670	237.581	96.4886	7.8175	6.54776	241.431	178.118	293.195	130.867	87.808	70.7907	7.76121	7.54723	8.14407	6.99945	6.27777	6.36606
A_23_P109286	0.0214871	0.565244	2.40937	up	NM_000830	chr21:30927622-30927563	GRIK1	Homo sapiens glutamate receptor, ionotropic, kainate 1 (GRIK1), transcript variant 1, mRNA [NM_000830]	GO:0051966|GO:0030054|GO:0005886|GO:0051967|GO:0005234|GO:0060079|GO:0035249|GO:0007268|GO:0007215|GO:0014054|GO:0007417|GO:0032230|GO:0030425|GO:0007399|GO:0042734|GO:0060080|GO:0032983|GO:0005887|GO:0045211|GO:0006810|GO:0015277|GO:0030534|GO:0048266	NM_000830	Hs.664641	2897	15.3896	6.50336	3.87801	2.60935	15.5741	9.60069	20.9941	8.876	5.63408	5	3.83236	3.37365	4.42801	2.90131	2.59014	2.3366
A_23_P398566	0.0345654	0.600234	2.3983	up	NM_173200	chr9:102628985-102629044	NR4A3	Homo sapiens nuclear receptor subfamily 4, group A, member 3 (NR4A3), transcript variant 3, mRNA [NM_173200]	GO:0010467|GO:0006367|GO:0031100|GO:0003707|GO:0043434|GO:0005634|GO:0048752|GO:0043524|GO:0007411|GO:0060005|GO:0050885|GO:0030534|GO:0005667|GO:0001707|GO:0033554|GO:0003677|GO:0045787|GO:0043565|GO:0008150|GO:0021766|GO:0001077|GO:2000108|GO:0008270|GO:0005654|GO:0004887	NM_173200	Hs.279522	8013	429.324	179.393	8.65709	7.39508	365.837	351.841	570.294	270.422	139.807	127.95	8.35375	8.5028	9.11473	8.02808	6.94123	7.21592
A_24_P234415	0.00592221	0.421984	2.39497	up	NM_003149	chr3:36588779-36588838	STAC	Homo sapiens SH3 and cysteine rich domain (STAC), mRNA [NM_003149]	GO:0035556|GO:0034605|GO:0005515|GO:0007165|GO:0046872|GO:0005829	NM_003149	Hs.56045	6769	431.769	174.75	8.6843	7.42429	462.805	452.451	380.051	204.962	146.664	172.623	8.67769	8.85713	8.51809	7.63952	6.99502	7.63834
A_23_P147605	0.0483838	0.626281	2.3922	up	NM_001003676	chr11:47183448-47183507	C11orf49	Homo sapiens chromosome 11 open reading frame 49 (C11orf49), transcript variant 1, mRNA [NM_001003676]	GO:0005730|GO:0005634	NM_001003676	Hs.368296	79096	1239.7	553.463	10.1969	8.93859	1369.48	945.194	1404.41	856.309	536.417	267.662	10.2757	9.89142	10.4237	9.70779	8.84202	8.26598
A_33_P3287348	0.0217201	0.565244	2.39032	up	NM_004067	chr7:29553778-29553837	CHN2	Homo sapiens chimerin 2 (CHN2), transcript variant 2, mRNA [NM_004067]	GO:0043547|GO:0005515|GO:0051056|GO:0016020|GO:0007264|GO:0005070|GO:0046872|GO:0005829|GO:0005096	NM_004067	Hs.654611	1124	1482.59	625.114	10.4546	9.19744	1669.08	1130.72	1647.98	899.555	497.544	478.243	10.5594	10.1485	10.656	9.78073	8.73968	9.07191
A_33_P3258003	0.0178667	0.541162	2.38962	up	NM_152788	chr12:99129397-99129338	ANKS1B	Homo sapiens ankyrin repeat and sterile alpha motif domain containing 1B (ANKS1B), transcript variant 1, mRNA [NM_152788]	GO:0005737|GO:0030054|GO:0015030|GO:0046875|GO:0043197|GO:0045211|GO:0014069	NM_152788	Hs.506458	56899	27.6219	12.1096	4.7474	3.49062	35.5727	20.5785	26.7145	18.4972	10.4483	7.38314	5.02917	4.46249	4.75054	4.02739	3.35878	3.08567
A_33_P3230166	0.0372636	0.608824	2.37023	up	NM_052867	chr13:101706223-101706164	NALCN	Homo sapiens sodium leak channel, non-selective (NALCN), mRNA [NM_052867]	GO:0005515|GO:0034220|GO:0005244|GO:0005886|GO:0005272|GO:0035725|GO:0016021|GO:0055085	NM_052867	Hs.525146	259232	13.1891	5	3.57449	2.32947	20.0541	6.4516	13.0615	5	5	5	4.18622	2.80773	3.72953	2.32214	2.32967	2.3366
A_33_P3273073	0.0357668	0.602915	2.36583	up	NM_021926	chr11:44289128-44289069	ALX4	Homo sapiens ALX homeobox 4 (ALX4), mRNA [NM_021926]	GO:0005667|GO:0003700|GO:0046982|GO:0048704|GO:0048565|GO:0042981|GO:0005634|GO:0009791|GO:0009952|GO:0003677|GO:0006351|GO:0043565|GO:0001501|GO:0007517|GO:0045944|GO:0035116|GO:0071837|GO:0060021|GO:0035115|GO:0001942|GO:0042733	NM_021926	Hs.436055	60529	95.2916	44.4974	6.56692	5.32457	99.8796	89.8542	96.1409	67.5427	44.6749	21.2746	6.52215	6.60062	6.57799	6.00475	5.3439	4.62507
A_23_P79803	0.0362632	0.606354	2.36557	up	NM_080607	chr20:36573562-36573621	VSTM2L	Homo sapiens V-set and transmembrane domain containing 2 like (VSTM2L), mRNA [NM_080607]	GO:0005515	NM_080607	Hs.517029	128434	1266.84	560.738	10.216	8.97384	1253.96	950.993	1595.56	576.025	827.963	278.226	10.1418	9.9031	10.6032	9.12449	9.48021	8.3168
A_32_P185637	0.0375636	0.608824	2.36492	up	NM_020882	chr20:61962227-61962285	COL20A1	Homo sapiens collagen, type XX, alpha 1 (COL20A1), mRNA [NM_020882]	GO:0031012|GO:0005581|GO:0030198|GO:0005788|GO:0005576|GO:0005615	NM_020882	Hs.271285	57642	39.4828	16.4423	5.23648	3.99469	36.5722	27.4735	54.4027	12.1814	19.2769	17.8685	5.07376	4.87335	5.76234	3.39513	4.21587	4.37307
A_23_P362148	0.00973852	0.479468	2.36086	up	NM_139072	chr2:230222968-230222909	DNER	Homo sapiens delta/notch-like EGF repeat containing (DNER), mRNA [NM_139072]	GO:0005515|GO:0007220|GO:0005886|GO:0005509|GO:0048741|GO:0005112|GO:0007417|GO:0007416|GO:0030425|GO:0006897|GO:0007219|GO:0030276|GO:0043025|GO:0010001|GO:0016021|GO:0001764|GO:0005769|GO:0004888	NM_139072	Hs.234074	92737	447.736	187.394	8.72373	7.48442	543.952	445.66	353.596	250.34	175.03	136.814	8.92509	8.83443	8.41169	7.91356	7.24037	7.29934
A_23_P2041	0.0220988	0.565244	2.35529	up	NM_032867	chr11:12380556-12380615	MICALCL	Homo sapiens MICAL C-terminal like (MICALCL), mRNA [NM_032867]	GO:0008150|GO:0005737|GO:0007275|GO:0007283|GO:0030154|GO:0051019	NM_032867	Hs.128196	84953	19.109	8.83113	4.24943	3.01353	21.4902	17.8761	17.9607	14.9706	6.07909	5.44373	4.29353	4.25683	4.19793	3.69147	2.68615	2.66297
A_33_P3406778	0.0265183	0.579398	2.3403	up	AK023843	chr14:75413496-75413437	PGF	placental growth factor [Source:HGNC Symbol;Acc:8893] [ENST00000405431]	GO:0048010|GO:0001666|GO:0001658|GO:0007565|GO:0008284|GO:0046982|GO:0042493|GO:0031100|GO:0007267|GO:0002040|GO:0005576|GO:0060688|GO:0005615|GO:0045766|GO:0042803|GO:0032870|GO:0030154|GO:0007165|GO:0001938|GO:0016020|GO:0051781|GO:0008083|GO:0008201		Hs.252820	5228	188.16	81.1742	7.49014	6.26345	190.678	135.159	238.642	118.907	74.0687	50.5467	7.43012	7.17855	7.86176	6.84861	6.05658	5.88516
A_33_P3728698	0.0171114	0.538202	2.33901	up	AK127183	chr8:103822140-103822199	FLJ45248	Homo sapiens cDNA FLJ45248 fis, clone BRHIP2006819. [AK127183]			Hs.224506	401472	605.601	256.682	9.17513	7.94923	619.614	513.764	683.425	233.075	214.567	322.405	9.11733	9.03921	9.36887	7.81263	7.51921	8.51586
A_23_P216812	0.000405188	0.27008	2.33725	up	NM_004936	chr9:22009038-22008979	CDKN2B	Homo sapiens cyclin-dependent kinase inhibitor 2B (p15, inhibits CDK4) (CDKN2B), transcript variant 1, mRNA [NM_004936]	GO:0005515|GO:0031670|GO:0010467|GO:0014070|GO:0007093|GO:0006367|GO:0008285|GO:0050680|GO:0005634|GO:0000079|GO:0048536|GO:0005829|GO:0005737|GO:0030858|GO:0000086|GO:0031668|GO:0045944|GO:0007179|GO:0007050|GO:0034097|GO:0030511|GO:0019901|GO:2000134|GO:0006351|GO:0042326|GO:0030219|GO:0004861|GO:0000278	NM_004936	Hs.72901	1030	12.6458	5.77856	3.64911	2.42429	13.1213	11.3049	13.5113	7.33569	5	5	3.56887	3.5984	3.78007	2.60662	2.32967	2.3366
A_23_P363826	0.0328224	0.599317	2.33566	up	NM_033406	chr11:33768335-33768289	FBXO3	Homo sapiens F-box protein 3 (FBXO3), transcript variant 2, mRNA [NM_033406]	GO:0005515|GO:0004842|GO:0016567|GO:0006508|GO:0005634	NM_033406	Hs.406787	26273	517.289	233.41	8.94598	7.72215	565.508	414.072	572.286	357.309	215.346	127.575	8.98515	8.73502	9.11777	8.43001	7.52488	7.21157
A_23_P127584	0.0288806	0.586388	2.33074	up	NM_006169	chr11:114183072-114183131	NNMT	Homo sapiens nicotinamide N-methyltransferase (NNMT), mRNA [NM_006169]	GO:0008112|GO:0006805|GO:0042493|GO:0031100|GO:0010243|GO:0044281|GO:0032259|GO:0005829	NM_006169	Hs.503911	4837	46.6532	21.2476	5.507	4.28621	60.3993	38.941	40.6194	31.7478	20.6646	11.3303	5.79799	5.3805	5.34251	4.85597	4.30767	3.69499
A_23_P35617	0.027288	0.579398	2.31864	up	NM_016341	chr10:96087933-96087992	PLCE1	Homo sapiens phospholipase C, epsilon 1 (PLCE1), transcript variant 1, mRNA [NM_016341]	GO:0045859|GO:0005515|GO:0019722|GO:0043647|GO:0005886|GO:0008283|GO:0007200|GO:0007265|GO:0046578|GO:0044281|GO:0006940|GO:0001558|GO:0007204|GO:0032835|GO:0007205|GO:0005829|GO:0005085|GO:0007507|GO:0004629|GO:0000187|GO:0005737|GO:0007173|GO:0007010|GO:0006651|GO:0017016|GO:0048016|GO:0005509|GO:0016042|GO:0008277|GO:0000139|GO:0004435|GO:0005057|GO:0019899|GO:0006644	NM_016341	Hs.655033	51196	46.3209	19.0353	5.43034	4.21706	71.4986	35.0835	32.3806	25.5765	15.2353	16.294	6.03551	5.22978	5.02571	4.52237	3.89974	4.22906
A_23_P17190	0.0287721	0.586275	2.30954	up	NM_006063	chr2:170382120-170382179	KLHL41	Homo sapiens kelch-like family member 41 (KLHL41), mRNA [NM_006063]	GO:0005515|GO:0005813|GO:0016567|GO:2000291|GO:0005886|GO:0031275|GO:0005730|GO:0006941|GO:0005634|GO:0035914|GO:0031430|GO:0001726|GO:0045661|GO:0031143|GO:0005737|GO:0030239|GO:0031463|GO:2001014|GO:0005856	NM_006063	Hs.50550	10324	21.2698	9.86108	4.40034	3.19273	24.9048	19.6335	19.271	15.7572	5.43063	8.39547	4.50356	4.39893	4.29854	3.77385	2.54464	3.25971
A_33_P3312842	0.00448463	0.397146	2.29707	up	NM_147128	chr7:30407227-30407286	ZNRF2	Homo sapiens zinc and ring finger 2 (ZNRF2), mRNA [NM_147128]	GO:0042734|GO:0030054|GO:0016567|GO:0016874|GO:0008270|GO:0005765|GO:0010008	NM_147128	Hs.263912	223082	34.8927	15.0227	5.0834	3.88361	45.7893	32.8541	26.0346	18.2814	14.5314	12.2554	5.39559	5.13905	4.71557	4.00844	3.83512	3.80727
A_24_P472007	0.0204107	0.561351	2.29206	up	NM_001080421	chr19:17712642-17712583	UNC13A	Homo sapiens unc-13 homolog A (C. elegans) (UNC13A), mRNA [NM_001080421]	GO:0016081|GO:0016082|GO:0030054|GO:0031594|GO:0035249|GO:0050435|GO:0046872|GO:0019992|GO:0060384|GO:0035556|GO:0042734|GO:0005737|GO:0007528|GO:0016188|GO:0001956|GO:0048172	NM_001080421	Hs.164502	23025	25.855	11.9688	4.66744	3.47079	30.8298	20.0528	26.6825	14.8133	14.7246	6.36856	4.82472	4.42857	4.74902	3.67529	3.85253	2.88456
A_23_P138352	0.0172103	0.538202	2.26947	up	NM_004185	chr1:113063369-113063428	WNT2B	Homo sapiens wingless-type MMTV integration site family, member 2B (WNT2B), transcript variant WNT-2B1, mRNA [NM_004185]	GO:0090263|GO:0005578|GO:0061072|GO:0005576|GO:0005615|GO:0021871|GO:0061303|GO:0005109|GO:0071425|GO:0045165|GO:0060638|GO:0002062|GO:0002088|GO:0030182|GO:0060492|GO:0016055|GO:0060070|GO:0090190|GO:0008584	NM_004185	Hs.258575	7482	18.2418	8.52692	4.18748	3.00512	16.6416	18.8189	19.265	13.5342	6.2257	5.82088	3.92964	4.33535	4.29744	3.54908	2.71237	2.75392
A_32_P135348	0.0290627	0.586388	2.25263	up	NM_033394	chr2:160088949-160089008	TANC1	Homo sapiens tetratricopeptide repeat, ankyrin repeat and coiled-coil containing 1 (TANC1), transcript variant 1, mRNA [NM_033394]	GO:0097062|GO:0030054|GO:0045211|GO:0008542|GO:0043025|GO:0014069|GO:0043679|GO:0007520|GO:0030425	NM_033394	Hs.61590	85461	1070.9	491.993	9.99147	8.81987	1288.26	880.023	1044.41	721.945	470.923	283.111	10.1863	9.79542	9.99272	9.46072	8.65691	8.34197
A_23_P109881	0.0150693	0.528431	2.24899	up	NM_002218	chr3:52847378-52847319	ITIH4	Homo sapiens inter-alpha-trypsin inhibitor heavy chain family, member 4 (ITIH4), transcript variant 1, mRNA [NM_002218]	GO:0010951|GO:0005515|GO:0005737|GO:0005886|GO:0004866|GO:0004867|GO:0030212|GO:0005576|GO:0006953|GO:0034097	NM_002218	Hs.709406	3700	406.805	178.554	8.59577	7.4265	435.395	363.85	421.171	242.177	134.497	158.987	8.5937	8.54363	8.64998	7.86176	6.89076	7.52698
A_33_P3241150	0.0125165	0.502422	2.24596	up		chr14:024977835-024977894							13.1294	5.71413	3.66577	2.49844	13.6058	8.85367	16.9288	6.53069	5	5.61171	3.62702	3.25971	4.11058	2.45523	2.32967	2.71041
A_24_P282343	0.0135802	0.514471	2.24236	up	NM_003159	chrX:18638000-18638059	CDKL5	Homo sapiens cyclin-dependent kinase-like 5 (CDKL5), transcript variant I, mRNA [NM_003159]	GO:0045773|GO:0005730|GO:0005634|GO:0032587|GO:0032839|GO:0044294|GO:0005524|GO:0032855|GO:0048365|GO:0005737|GO:0046777|GO:0004672|GO:0004674|GO:0016301|GO:0050775|GO:0050773|GO:0006468|GO:0001764|GO:0004693	NM_003159	Hs.659851	6792	578.22	253.902	9.10174	7.93672	701.62	468.404	564.634	325.716	204.267	231.724	9.29813	8.9078	9.09928	8.30286	7.45193	8.05537
A_33_P3237899	0.0011262	0.317841	2.24165	up	NM_004067	chr7:29440292-29440351	CHN2	Homo sapiens chimerin 2 (CHN2), transcript variant 2, mRNA [NM_004067]	GO:0043547|GO:0005515|GO:0051056|GO:0016020|GO:0007264|GO:0005070|GO:0046872|GO:0005829|GO:0005096	NM_004067	Hs.654611	1124	598.273	261.746	9.15687	7.99231	709.074	538.291	547.455	305.874	266.206	213.159	9.31358	9.10354	9.05351	8.21295	7.82863	7.93536
A_23_P169092	0.00505562	0.409392	2.23681	up	NM_004820	chr8:65527626-65517399	CYP7B1	Homo sapiens cytochrome P450, family 7, subfamily B, polypeptide 1 (CYP7B1), mRNA [NM_004820]	GO:0050679|GO:0008219|GO:0006805|GO:0005506|GO:0006699|GO:0008396|GO:0060740|GO:0044281|GO:0005789|GO:0008206|GO:0033783|GO:0016125|GO:0033147|GO:0008203|GO:0020037	NM_004820	Hs.667720	9420	58.1797	26.1841	5.82332	4.66188	75.9527	47.218	51.3683	33.4634	26.3676	18.7214	6.1178	5.66864	5.68353	4.93548	4.61842	4.43174
A_24_P342829	0.0198053	0.553763	2.23204	up	NM_152527	chr2:230900056-230899997	SLC16A14	Homo sapiens solute carrier family 16, member 14 (SLC16A14), mRNA [NM_152527]	GO:0005886|GO:0016021|GO:0015293	NM_152527	Hs.504317	151473	16.4822	8.16333	4.04041	2.88205	15.8145	16.6074	17.0247	11.7843	7.7057	5	3.85462	4.14607	4.12054	3.34401	2.96555	2.3366
A_23_P113161	0.0112289	0.495657	2.22848	up	NM_030806	chr1:184597996-184598055	C1orf21	Homo sapiens chromosome 1 open reading frame 21 (C1orf21), mRNA [NM_030806]		NM_030806	Hs.744936	81563	254.006	111.075	7.92949	6.77343	257.662	208.771	295.584	143.663	91.6178	97.9452	7.86019	7.76944	8.15883	7.13027	6.33952	6.85049
A_23_P135239	0.00404232	0.388149	2.22645	up	NM_005077	chr9:84199177-84199118	TLE1	Homo sapiens transducin-like enhancer of split 1 (E(sp1) homolog, Drosophila) (TLE1), mRNA [NM_005077]	GO:0005515|GO:0005667|GO:0001106|GO:0030178|GO:0005634|GO:0007275|GO:2000811|GO:0005829|GO:0010628|GO:0007165|GO:0007219|GO:0003682|GO:0009887|GO:0005654|GO:0016055|GO:0045892|GO:0043124|GO:0008134	NM_005077	Hs.197320	7088	981.876	421.641	9.84633	8.69159	1253.67	760.51	931.454	417.484	429.704	417.735	10.141	9.58662	9.8114	8.65773	8.52144	8.89558
A_33_P3277373	0.000906472	0.304151	2.22563	up	NM_020530	chr22:30660206-30660147	OSM	Homo sapiens oncostatin M (OSM), mRNA [NM_020530]	GO:0042506|GO:0008284|GO:0008285|GO:0042503|GO:0009408|GO:0008283|GO:0042508|GO:0050731|GO:0005615|GO:0046888|GO:0006955|GO:0033138|GO:0002675|GO:0045944|GO:0051781|GO:0005147|GO:0006915|GO:0007275|GO:0005125|GO:0007422|GO:0005900|GO:0043410|GO:0008083|GO:0045835|GO:0048266|GO:0040008	NM_020530	Hs.248156	5008	27.9356	12.5059	4.7818	3.62759	32.4557	22.445	28.9061	12.6749	13.3586	11.4842	4.89551	4.58816	4.86175	3.45322	3.71478	3.71478
A_33_P3354256	0.00424355	0.391846	2.21595	up	NM_001282971	chr8:125565128-125565069	MTSS1	Homo sapiens metastasis suppressor 1 (MTSS1), transcript variant 1, mRNA [NM_001282971]	GO:0072160|GO:0005515|GO:0017124|GO:0030036|GO:0072102|GO:0030035|GO:0050680|GO:0005102|GO:0006928|GO:0030139|GO:0015629|GO:0001726|GO:0071498|GO:0042802|GO:0061333|GO:0003785|GO:0005737|GO:2001013|GO:0030041|GO:0046847|GO:0007155|GO:0007169|GO:0008093	NM_001282971	Hs.336994	9788	65.6259	29.5618	6.01355	4.86563	65.8599	54.7898	76.228	37.2403	25.2769	26.1681	5.92324	5.87287	6.24454	5.106	4.56854	4.92235
A_23_P46131	0.00507073	0.409392	2.20133	up	NM_024869	chr1:26488994-26489053	FAM110D	Homo sapiens family with sequence similarity 110, member D (FAM110D), mRNA [NM_024869]		NM_024869	Hs.694119	79927	2385.87	1062.81	11.1416	10.0032	2444.72	2627.87	2085.01	1320.96	975.418	892.061	11.1093	11.3233	10.9922	10.3411	9.72835	9.9402
A_33_P3297978	0.0274052	0.579398	2.1977	up	NM_004998	chr15:59428708-59428649	MYO1E	Homo sapiens myosin IE (MYO1E), mRNA [NM_004998]	GO:0030048|GO:0005515|GO:0005516|GO:0072015|GO:0042623|GO:0016459|GO:0015629|GO:0032836|GO:0001701|GO:0005524|GO:0006897|GO:0000146|GO:0003774|GO:0005737|GO:0051015|GO:0045334|GO:0005912|GO:0003094|GO:0005911|GO:0035166|GO:0048008|GO:0035091|GO:0005856|GO:0001570	NM_004998	Hs.654506	4643	409.688	180.666	8.59741	7.46142	509.086	365.909	354.07	200.781	132.108	209.109	8.82606	8.55231	8.41385	7.61156	6.86195	7.91074
A_33_P3283824	0.0161479	0.537043	2.19757	up	NM_001135147	chr4:103172475-103172416	SLC39A8	Homo sapiens solute carrier family 39 (zinc transporter), member 8 (SLC39A8), transcript variant 3, mRNA [NM_001135147]	GO:0005886|GO:0046873|GO:0031090|GO:0006829|GO:0016021|GO:0055085	NM_001135147	Hs.288034	64116	12.7057	6.04286	3.61024	2.47433	15.7272	8.05682	14.3332	8.12858	5	5	3.84658	3.1174	3.86674	2.75672	2.32967	2.3366
A_33_P3393170	0.0333851	0.599317	2.19372	up	NM_004055	chr11:76837137-76837196	CAPN5	Homo sapiens calpain 5 (CAPN5), mRNA [NM_004055]	GO:0005622|GO:0007165|GO:0004198|GO:0009986|GO:0006508	NM_004055	Hs.248153	726	555.582	259.575	9.03267	7.89929	588.158	417.443	661.145	375.276	253.731	149.719	9.0333	8.74347	9.32124	8.50014	7.75931	7.43842
A_23_P422245	0.0328777	0.599317	2.18622	up	NM_173665	chr5:93855438-93855379	KIAA0825	Homo sapiens KIAA0825 (KIAA0825), transcript variant 2, mRNA [NM_173665]		NM_173665	Hs.425123	285600	15.2453	7.32247	3.92488	2.79645	14.6583	14.5089	16.5686	7.33547	5	9.63195	3.73896	3.95367	4.08202	2.60624	2.32967	3.45343
A_24_P173823	0.00600492	0.423134	2.18592	up	NM_002585	chr1:164820976-164821035	PBX1	Homo sapiens pre-B-cell leukemia homeobox 1 (PBX1), transcript variant 1, mRNA [NM_002585]	GO:0005515|GO:0008284|GO:0006694|GO:0001658|GO:0003700|GO:0030325|GO:0048706|GO:0048538|GO:0005634|GO:0009954|GO:0030326|GO:0048536|GO:0009952|GO:0043433|GO:0005737|GO:0030278|GO:0009887|GO:0007548|GO:0035162|GO:0005667|GO:0046982|GO:0005730|GO:0003677|GO:0043565|GO:0001077|GO:0010971|GO:0045665|GO:0008134	NM_002585	Hs.557097	5087	1182.37	535.398	10.1245	8.99628	1212.27	918.468	1416.35	538.365	689.197	378.632	10.086	9.85338	10.4342	9.03574	9.1963	8.75681
A_24_P405205	0.0214739	0.565244	2.18356	up	NM_001001396	chr1:203713041-203713100	ATP2B4	Homo sapiens ATPase, Ca++ transporting, plasma membrane 4 (ATP2B4), transcript variant 1, mRNA [NM_001001396]	GO:0005515|GO:0005516|GO:0005886|GO:0005524|GO:0055085|GO:0046872|GO:0005388|GO:0043234|GO:0034220|GO:0005887|GO:0007596|GO:0097110|GO:0006810|GO:0017080	NM_001001396	Hs.343522	493	1599.07	751.41	10.5799	9.45322	1671.34	1323.4	1802.47	1065.11	656.736	532.383	10.5603	10.3857	10.7937	10.018	9.12326	9.21835
A_33_P3302115	0.0226238	0.565244	2.1811	up	NM_005898	chr11:34124059-34124118	CAPRIN1	Homo sapiens cell cycle associated protein 1 (CAPRIN1), transcript variant 1, mRNA [NM_005898]	GO:0017148|GO:0005737|GO:0010494|GO:0005887|GO:0000932|GO:0050775|GO:0003723|GO:0061003|GO:0030425|GO:0005829	NM_005898	Hs.471818	4076	1608.88	752.499	10.5814	9.45636	1627.05	1298.64	1900.94	981.344	838.6	437.553	10.516	10.3621	10.8661	9.90486	9.50477	8.95944
A_33_P3319815	0.0039514	0.387988	2.18036	up	NR_038428	chrX:3202585-3202644	CXorf28	Homo sapiens chromosome X open reading frame 28 (CXorf28), long non-coding RNA [NR_038428]		NR_038428	Hs.187816	100129464	20.0146	9.29715	4.29972	3.17515	21.3559	15.4865	23.2013	10.1173	10.7024	7.07175	4.28554	4.04673	4.5669	3.10735	3.39656	3.02155
A_33_P3442605	0.0277569	0.579788	2.18022	up	NR_033928	chr8:23088374-23088433	LOC389641	Homo sapiens uncharacterized LOC389641 (LOC389641), long non-coding RNA [NR_033928]		NR_033928	Hs.591835	389641	46.8854	22.8799	5.53778	4.41331	53.3802	40.942	46.3339	36.4046	17.0221	15.213	5.61548	5.46164	5.53621	5.07094	4.04523	4.12376
A_23_P308974	0.017777	0.540363	2.1777	up	NM_207517	chr15:84708037-84708096	ADAMTSL3	Homo sapiens ADAMTS-like 3 (ADAMTSL3), mRNA [NM_207517]	GO:0005578|GO:0008270|GO:0008237	NM_207517	Hs.459162	57188	63.5015	28.2085	5.92683	4.80403	50.1458	52.5406	87.818	30.8625	26.6862	27.0766	5.52332	5.81178	6.4454	4.80394	4.63618	4.97197
A_24_P71700	0.00845371	0.458974	2.17682	up	NM_145166	chr3:42708933-42708992	ZBTB47	Homo sapiens zinc finger and BTB domain containing 47 (ZBTB47), mRNA [NM_145166]	GO:0006355|GO:0005634|GO:0003677|GO:0046872|GO:0006351	NM_145166	Hs.409561	92999	1451.02	663.19	10.4382	9.31601	1499.68	1293.26	1560.1	829.003	559.461	601.108	10.3905	10.3538	10.5704	9.65995	8.89967	9.38841
A_32_P62211	0.0184205	0.544716	2.17096	up	XR_241982	chr6:16763019-16763078	LOC101928433	PREDICTED: Homo sapiens uncharacterized LOC101928433 (LOC101928433), misc_RNA [XR_241982]		XR_241982	Hs.408455	101928433	40.1511	19.2784	5.29878	4.18045	46.2029	31.3165	42.9338	28.0301	18.0619	11.7431	5.41018	5.06371	5.42246	4.66376	4.1323	3.74528
A_33_P3379775	0.00650106	0.425063	2.16756	up		chr9:84248423-84248384	TLE1	transducin-like enhancer of split 1 (E(sp1) homolog, Drosophila) [Source:HGNC Symbol;Acc:11837] [ENST00000376463]	GO:0005515|GO:0005667|GO:0001106|GO:0030178|GO:0005634|GO:0007275|GO:2000811|GO:0005829|GO:0010628|GO:0007165|GO:0007219|GO:0003682|GO:0009887|GO:0005654|GO:0016055|GO:0045892|GO:0043124|GO:0008134			7088	89.0753	40.0117	6.43093	5.31486	113.637	67.7476	85.8418	36.8086	41.356	41.8706	6.69753	6.18073	6.41453	5.08869	5.24716	5.60872
A_33_P3373259	0.00361115	0.377589	2.1655	up	NM_018398	chr3:54913050-54913109	CACNA2D3	Homo sapiens calcium channel, voltage-dependent, alpha 2/delta subunit 3 (CACNA2D3), mRNA [NM_018398]	GO:0005245|GO:0016021|GO:0046872	NM_018398	Hs.656687	55799	11.2662	5.23247	3.45581	2.34112	12.3645	8.12037	13.3136	5.69741	5	5	3.47983	3.12932	3.75829	2.35708	2.32967	2.3366
A_33_P3306654	0.00604883	0.423134	2.16043	up	NR_024480	chr3:194019117-194019058	LINC00887	Homo sapiens long intergenic non-protein coding RNA 887 (LINC00887), long non-coding RNA [NR_024480]		NR_024480	Hs.128066	100131551	28.4848	13.3291	4.81034	3.69902	28.7539	23.6242	33.0763	16.834	10.4352	12.718	4.71692	4.66346	5.05065	3.87682	3.35773	3.86251
A_23_P102950	0.0278524	0.580253	2.15739	up	NM_080860	chr21:43892680-43892621	RSPH1	Homo sapiens radial spoke head 1 homolog (Chlamydomonas) (RSPH1), transcript variant 1, mRNA [NM_080860]	GO:0007126|GO:0005634|GO:0005829	NM_080860	Hs.661069	89765	23.0828	10.4392	4.44608	3.33679	21.2858	15.1419	32.8206	13.1918	10.5775	7.54824	4.27927	4.0163	5.04267	3.5126	3.37625	3.12153
A_23_P416581	0.0163726	0.538202	2.15611	up	NM_002073	chr22:23467137-23467196	GNAZ	Homo sapiens guanine nucleotide binding protein (G protein), alpha z polypeptide (GNAZ), mRNA [NM_002073]	GO:0005886|GO:0005783|GO:0005834|GO:0003924|GO:0005635|GO:0031683|GO:0005525|GO:0007193|GO:0046872|GO:0005829|GO:0031234|GO:0007186|GO:0031821|GO:0007188|GO:0004871|GO:0005057	NM_002073	Hs.584760	2781	2112.21	973.77	10.9721	9.86368	2391.49	2058.09	1887.05	1236.47	751.206	933.638	11.0797	10.9804	10.8563	10.2446	9.33992	10.0066
A_33_P3313796	0.0273572	0.579398	2.15327	up	NM_030771	chr11:27360176-27360117	CCDC34	Homo sapiens coiled-coil domain containing 34 (CCDC34), transcript variant 1, mRNA [NM_030771]		NM_030771	Hs.143733	91057	2986.83	1406.4	11.4674	10.3609	2873.35	2664.99	3422.16	2009.29	1259.12	950.8	11.3392	11.3444	11.7186	10.961	10.0916	10.0301
A_32_P17635	0.003983	0.387988	2.15195	up	NM_032102	chr11:94804156-94804215	SRSF8	Homo sapiens serine/arginine-rich splicing factor 8 (SRSF8), transcript variant 1, mRNA [NM_032102]	GO:0008380|GO:0006397|GO:0005515|GO:0000166|GO:0003723|GO:0005634	NM_032102	Hs.476680	10929	1053.29	485.289	9.9703	8.86466	1168.28	1028.19	963.41	611.961	487.984	355.921	10.0331	10.0138	9.86399	9.21881	8.7134	8.66177
A_33_P3423854	0.000145692	0.19259	2.13952	up	NM_001278543	chr1:57394968-57394909	C8B	Homo sapiens complement component 8, beta polypeptide (C8B), transcript variant 2, mRNA [NM_001278543]	GO:0006957|GO:0030449|GO:0006956|GO:0006955|GO:0016020|GO:0005579|GO:0045087|GO:0019835|GO:0006958|GO:0005576|GO:0032403|GO:0005615	NM_001278543	Hs.391835	732	21.2366	10.0766	4.40084	3.30355	23.9906	20.3844	19.3347	10.9239	10.881	8.42492	4.4492	4.44956	4.30376	3.22375	3.42252	3.26438
A_23_P415395	0.00486875	0.408689	2.13203	up	NM_145208	chr19:8953627-8953686	MBD3L1	Homo sapiens methyl-CpG binding domain protein 3-like 1 (MBD3L1), mRNA [NM_145208]	GO:0006355|GO:0005634|GO:0006351	NM_145208	Hs.133912	85509	12.1246	5.61146	3.58498	2.49275	11.6249	12.4659	12.2829	5	6.83438	5	3.38567	3.73598	3.63328	2.32214	2.8195	2.3366
A_32_P34920	0.00396269	0.387988	2.12962	up	NM_004472	chr5:72742495-72742436	FOXD1	Homo sapiens forkhead box D1 (FOXD1), mRNA [NM_004472]	GO:0003700|GO:0090184|GO:0008301|GO:0005634|GO:0003677|GO:0006351|GO:0060678|GO:0072213|GO:0010628|GO:0043565|GO:0030513|GO:0072267|GO:0045892	NM_004472	Hs.519385	2297	1007.36	461.616	9.88836	8.79777	1174.22	1078.63	769.228	453.993	563.659	367.197	10.0377	10.0834	9.54403	8.77653	8.91059	8.70618
A_33_P3353372	0.0376955	0.608824	2.1296	up		chr7:156461704-156461646		Q94CS5_ORYSA (Q94CS5) Heavy-metal-associated domain-containing protein-like, partial (6%) [THC2700154]					48.7417	24.3199	5.58584	4.49526	48.5013	40.5435	57.1804	38.6143	19.2633	15.082	5.47608	5.4483	5.83315	5.16117	4.21404	4.11058
A_33_P3332492	0.0130969	0.505751	2.12952	up	NM_145235	chr10:127697059-127697118	FANK1	Homo sapiens fibronectin type III and ankyrin repeat domains 1 (FANK1), mRNA [NM_145235]	GO:0005737|GO:0005730|GO:0005634	NM_145235	Hs.352591	92565	15.9551	7.77588	3.97782	2.88729	17.2761	12.6632	17.926	11.5489	6.71916	5.05955	3.98011	3.75868	4.19468	3.31143	2.79579	2.55467
A_33_P3318791	0.00583433	0.420489	2.12288	up	NR_024037	chr12:97927464-97927523	RMST	Homo sapiens rhabdomyosarcoma 2 associated transcript (non-protein coding) (RMST), long non-coding RNA [NR_024037]		NR_024037	Hs.652568	196475	13.0367	6.51147	3.69076	2.60474	13.2669	11.2696	14.5735	7.01058	7.52384	5	3.58648	3.59332	3.89248	2.54244	2.93518	2.3366
A_33_P3418380	0.0462377	0.624587	2.11986	up		chr16:034724566-034724625							12.9052	6.40954	3.62739	2.54341	10.1455	17.6637	10.9064	9.22864	5	5	3.18185	4.23927	3.46104	2.96398	2.32967	2.3366
A_24_P225878	0.00217169	0.358224	2.11976	up	NM_022342	chr3:47277037-47270168	KIF9	Homo sapiens kinesin family member 9 (KIF9), transcript variant 1, mRNA [NM_022342]	GO:0008017|GO:0005515|GO:0005871|GO:0005737|GO:0007596|GO:0005874|GO:0003777|GO:0005524|GO:0007018	NM_022342	Hs.373947	64147	24.8144	12.093	4.62397	3.54007	27.9451	24.7336	21.7644	14.9965	12.8182	8.46419	4.67345	4.72262	4.47585	3.69266	3.65625	3.2713
A_32_P192545	0.0473215	0.626281	2.11844	up	NM_001006938	chrX:101395635-101395576	TCEAL6	Homo sapiens transcription elongation factor A (SII)-like 6 (TCEAL6), mRNA [NM_001006938]	GO:0006355|GO:0005634|GO:0006351	NM_001006938	Hs.447815	158931	1725.88	866.443	10.6986	9.61557	1803.92	1564.27	1809.45	1354.68	712.382	532.265	10.6765	10.6194	10.7998	10.3731	9.25589	9.21776
A_23_P45011	0.0105897	0.485998	2.10194	up	NM_030949	chr6:150570937-150570996	PPP1R14C	Homo sapiens protein phosphatase 1, regulatory (inhibitor) subunit 14C (PPP1R14C), mRNA [NM_030949]	GO:0042325|GO:0005737|GO:0016020|GO:0004865	NM_030949	Hs.486798	81706	464.361	220.294	8.78812	7.7164	419.566	425.36	548.156	277.157	233.93	149.796	8.53895	8.76897	9.05645	8.06257	7.64786	7.43879
A_23_P149626	0.0273789	0.579398	2.09646	up	NM_198681	chr1:6527281-6527222	PLEKHG5	Homo sapiens pleckstrin homology domain containing, family G (with RhoGef domain) member 5 (PLEKHG5), transcript variant 2, mRNA [NM_198681]	GO:0051056|GO:0048471|GO:0048011|GO:0035767|GO:0043065|GO:0005886|GO:0007264|GO:0035023|GO:0030139|GO:0097190|GO:0030027|GO:0005829|GO:0005737|GO:0005543|GO:0005911|GO:0004871|GO:0043123|GO:0005089	NM_198681	Hs.284232	57449	192.861	90.6992	7.51145	6.4435	189.442	132.881	256.261	113.138	101.888	57.0723	7.42073	7.15509	7.95853	6.77379	6.49588	6.06082
A_23_P412427	0.0470756	0.626281	2.09464	up	NR_046316	chr11:780489-780548	NS3BP	Homo sapiens NS3BP (NS3BP), long non-coding RNA [NR_046316]		NR_046316	Hs.711081	171391	28.8272	13.1257	4.72768	3.66098	46.762	18.7004	21.0193	16.8906	13.0759	9.41069	5.42762	4.32615	4.42926	3.88256	3.68286	3.41751
A_33_P3379091	0.0490428	0.626281	2.09307	up	NM_145731	chr22:39774334-39774393	SYNGR1	Homo sapiens synaptogyrin 1 (SYNGR1), transcript variant 1b, mRNA [NM_145731]	GO:0042470|GO:0030054|GO:0048169|GO:0030672|GO:0016021|GO:0006605|GO:0048172	NM_145731	Hs.216226	9145	913.839	458.081	9.76387	8.69825	887.273	752.811	1101.43	619.576	523.481	231.185	9.64022	9.57655	10.0748	9.23869	8.80667	8.04939
A_23_P200325	0.000691039	0.286355	2.08854	up	NM_014857	chr1:174927036-174927095	RABGAP1L	Homo sapiens RAB GTPase activating protein 1-like (RABGAP1L), transcript variant 1, mRNA [NM_014857]	GO:0032880|GO:0017137|GO:0005794|GO:0032851|GO:0005634|GO:0005769|GO:0005097	NM_014857	Hs.744937	9910	204.63	95.3348	7.63073	6.56824	234.918	178.883	200.089	107.207	93.325	85.473	7.72277	7.55438	7.61505	6.69785	6.36995	6.63692
A_33_P3242508	0.0063073	0.424013	2.07895	up	NM_199450	chr10:64148232-64148291	ZNF365	Homo sapiens zinc finger protein 365 (ZNF365), transcript variant B, mRNA [NM_199450]	GO:0005515|GO:0005737|GO:0005815	NM_199450	Hs.22653	22891	10.8872	5.1695	3.39309	2.33724	14.9172	9.34158	8.40299	5.50851	5	5	3.76599	3.33739	3.07589	2.34545	2.32967	2.3366
A_23_P26386	0.0357796	0.602915	2.06548	up	NM_016140	chr16:67424389-67424214	TPPP3	Homo sapiens tubulin polymerization-promoting protein family member 3 (TPPP3), mRNA [NM_016140]	GO:0005737|GO:0015631|GO:0001578|GO:0005874	NM_016140	Hs.534458	51673	28.6417	14.0261	4.77867	3.73219	30.8494	18.7381	36.3377	19.9726	13.0102	9.09564	4.82619	4.32883	5.18099	4.15184	3.67658	3.36817
A_33_P3306894	0.0470402	0.626281	2.06202	up	NM_012194	chr11:33604987-33605046	KIAA1549L	Homo sapiens KIAA1549-like (KIAA1549L), mRNA [NM_012194]	GO:0016021	NM_012194	Hs.502266	25758	22.0057	10.651	4.39198	3.34792	24.2189	28.1018	13.6965	15.0794	9.22822	7.64527	4.46489	4.90942	3.80161	3.70362	3.19829	3.14185
A_23_P140876	0.0187344	0.547018	2.06151	up	NM_001089	chr16:2326322-2326263	ABCA3	Homo sapiens ATP-binding cassette, sub-family A (ABC1), member 3 (ABCA3), mRNA [NM_001089]	GO:0005215|GO:0097233|GO:0016020|GO:0005886|GO:0097208|GO:0042493|GO:0006810|GO:0042626|GO:0016021|GO:0055085|GO:0005524	NM_001089	Hs.26630	21	1032.52	516.155	9.94953	8.90583	1053.1	1049.19	995.284	677.975	565.741	304.748	9.88345	10.0472	9.91792	9.3652	8.91678	8.4355
A_32_P797019	0.0489865	0.626281	2.05786	up	XR_158947	chr20:57294162-57294221		aminopeptidase-like 1 [Source:HGNC Symbol;Acc:16244] [ENST00000532531]		XR_158947	Hs.554211		15.3206	7.41152	3.8553	2.81416	22.3858	12.9932	10.5827	10.7118	5	6.52277	4.35028	3.79848	3.41716	3.1967	2.32967	2.91611
A_23_P102364	0.0118414	0.496995	2.05698	up	NM_019850	chr2:233743527-233743468	NGEF	Homo sapiens neuronal guanine nucleotide exchange factor (NGEF), transcript variant 1, mRNA [NM_019850]	GO:0051056|GO:0048011|GO:0043065|GO:0005886|GO:0048013|GO:0007264|GO:0035023|GO:0097190|GO:0043087|GO:0005829|GO:0030426|GO:0005737|GO:0005543|GO:0005089|GO:0061002	NM_019850	Hs.97316	25791	262.802	121.027	7.9561	6.91557	263.848	193.103	331.456	121.311	117.82	123.95	7.89034	7.6601	8.31785	6.88074	6.69483	7.17114
A_33_P3347971	0.0213715	0.565244	2.04934	up	NM_001025252	chr8:80947166-80947107	TPD52	Homo sapiens tumor protein D52 (TPD52), transcript variant 1, mRNA [NM_001025252]	GO:0005515|GO:0048471|GO:0005737|GO:0046982|GO:0005783|GO:0030183|GO:0005509|GO:0009653|GO:0046903|GO:0042803	NM_001025252	Hs.368433	7163	100.831	49.995	6.63456	5.5994	99.9638	84.0514	118.479	70.6201	39.8785	39.4862	6.52321	6.50719	6.87328	6.07614	5.20206	5.52001
A_23_P345692	0.0268596	0.579398	2.04802	up	NM_138284	chr13:21296978-21297037	IL17D	Homo sapiens interleukin 17D (IL17D), mRNA [NM_138284]	GO:0006954|GO:0005615|GO:0005125	NM_138284	Hs.655142	53342	328.054	156.918	8.26877	7.23454	380.74	369.255	234.166	199.793	169.968	100.993	8.40555	8.56578	7.83499	7.6055	7.20435	6.89378
A_33_P3414422	0.0382229	0.609957	2.04439	up	NM_020806	chr14:67648373-67648432	GPHN	Homo sapiens gephyrin (GPHN), transcript variant 1, mRNA [NM_020806]	GO:0030054|GO:0005886|GO:0006767|GO:0044281|GO:0005524|GO:0046872|GO:0032324|GO:0005737|GO:0007529|GO:0006766|GO:0045211|GO:0006777|GO:0005856|GO:0016740	NM_020806	Hs.208765	10243	1461.99	737.136	10.4478	9.41609	1710.43	1285.48	1390.06	1087.24	580.216	543.951	10.5954	10.3423	10.4056	10.0522	8.94433	9.25179
A_33_P3367126	0.0041175	0.388523	2.03636	up	NM_001177693	chr5:73169011-73169070	ARHGEF28	Homo sapiens Rho guanine nucleotide exchange factor (GEF) 28 (ARHGEF28), transcript variant 2, mRNA [NM_001177693]	GO:0035556|GO:0005737|GO:0005543|GO:0005886|GO:0035023|GO:0003723|GO:0015630|GO:0005089|GO:0046872|GO:0030154	NM_001177693	Hs.482521	64283	10.4903	5	3.35546	2.32947	12.1007	11.3081	8.06216	5	5	5	3.44739	3.59966	3.01934	2.32214	2.32967	2.3366
A_24_P188377	0.0262523	0.576977	2.0341	up	NM_000574	chr1:207510071-207510130	CD55	Homo sapiens CD55 molecule, decay accelerating factor for complement (Cromer blood group) (CD55), transcript variant 1, mRNA [NM_000574]	GO:0045730|GO:0004857|GO:0030449|GO:0005886|GO:0009986|GO:0060137|GO:0043434|GO:0005576|GO:0007283|GO:0031225|GO:0007204|GO:0045916|GO:0016324|GO:0001618|GO:0005887|GO:0045087|GO:0006958|GO:0045121	NM_000574	Hs.126517	1604	12.2344	6.28744	3.54557	2.52117	17.3346	8.50343	10.8652	8.86231	5	5	3.98264	3.19897	3.45509	2.89726	2.32967	2.3366
A_33_P3233580	0.0215733	0.565244	2.02879	up	NM_001282769	chr10:24834162-24834221	KIAA1217	Homo sapiens KIAA1217 (KIAA1217), transcript variant 6, mRNA [NM_001282769]	GO:0003674|GO:0005737|GO:0048706	NM_001282769	Hs.445885	56243	1830.55	912.994	10.7716	9.75096	1919.52	1529.37	2042.76	1253.54	798.277	687.166	10.7675	10.59	10.9572	10.26	9.42465	9.56821
A_23_P72912	3.71711e-06	0.0280623	2.02847	up	AB018282	chr12:51890993-51891052	SLC4A8	solute carrier family 4, sodium bicarbonate cotransporter, member 8 [Source:HGNC Symbol;Acc:11034] [ENST00000551071]	GO:0005886|GO:0005452|GO:0015701|GO:0016021|GO:0006814|GO:0055085|GO:0006811		Hs.4749	9498	10.3074	5	3.34986	2.32947	11.4092	9.72628	9.78663	5	5	5	3.36442	3.39005	3.29511	2.32214	2.32967	2.3366
A_33_P3293169	0.0305808	0.592425	2.02706	up	NM_001267783	chr11:46563555-46563496	AMBRA1	Homo sapiens autophagy/beclin-1 regulator 1 (AMBRA1), transcript variant 3, mRNA [NM_001267783]	GO:0005515|GO:0005737|GO:0043065|GO:0008285|GO:0005776|GO:0021915|GO:0006914|GO:0031410|GO:0030154	NM_001267783	Hs.654644	55626	53.6074	26.7654	5.71592	4.69653	59.8795	59.7811	41.1614	38.0688	20.2754	21.952	5.78513	6.00143	5.3612	5.1378	4.28055	4.67123
A_33_P3417626	0.0409221	0.617048	2.01879	up	NM_198573	chr9:34521161-34521102	ENHO	Homo sapiens energy homeostasis associated (ENHO), mRNA [NM_198573]	GO:0005576	NM_198573	Hs.522085	375704	362.2	180.382	8.4131	7.3996	304.287	298.555	483.759	223.823	213.781	103.543	8.08943	8.2773	8.87256	7.7577	7.51163	6.92947
A_23_P4551	0.0404167	0.617048	2.0174	up	NM_015559	chr18:42644693-42644752	SETBP1	Homo sapiens SET binding protein 1 (SETBP1), transcript variant 1, mRNA [NM_015559]	GO:0005634|GO:0003677	NM_015559	Hs.435458	26040	1055.46	525.914	9.97245	8.95995	1209.21	875.201	1081.96	710.09	376.596	491.056	10.081	9.78551	10.0509	9.43316	8.33595	9.11075
A_23_P162211	0.00120632	0.331169	2.01598	up	NM_018050	chr12:12483006-12482947	MANSC1	Homo sapiens MANSC domain containing 1 (MANSC1), mRNA [NM_018050]	GO:0016021	NM_018050	Hs.591145	54682	32.2921	16.2824	4.9986	3.98711	33.8698	29.4489	33.5576	20.4842	16.3339	12.0291	4.95493	4.9714	5.06947	4.18842	3.99344	3.77948
A_33_P3344399	0.0317744	0.596899	2.01534	up	NM_001199018	chr15:71341786-71341845	LRRC49	Homo sapiens leucine rich repeat containing 49 (LRRC49), transcript variant 3, mRNA [NM_001199018]	GO:0005737|GO:0005874	NM_001199018	Hs.12692	54839	262.097	130.903	7.98451	6.97349	273.461	242.111	270.719	190.386	99.434	102.89	7.93421	7.98446	8.03486	7.53633	6.46274	6.92138
A_32_P97862	0.00520633	0.409392	2.00643	up	NM_001145474	chr1:47139193-47139252	TEX38	Homo sapiens testis expressed 38 (TEX38), mRNA [NM_001145474]	GO:0016021	NM_001145474	Hs.443299	374973	68.6896	34.3471	6.09098	5.08635	71.8943	69.9713	64.2033	39.5283	29.1436	34.3694	6.04431	6.22459	6.00404	5.19826	4.75538	5.30541
A_33_P3211260	0.0404214	0.617048	2.00636	up	AB209486	chr7:44111049-44111108	DBNL	Homo sapiens mRNA for Drebrin-like protein variant protein. [AB209486]	GO:0005515|GO:0071800|GO:0030054|GO:0005886|GO:0002102|GO:0006921|GO:0030425|GO:0005829|GO:0005737|GO:0051015|GO:0005938|GO:0019904|GO:0006915|GO:0014069|GO:0003779|GO:0007257|GO:0008022|GO:0001726|GO:0007416|GO:0030027|GO:0006897|GO:0030665|GO:0016601|GO:0000139|GO:0048812|GO:0008047			28988	514.569	253.179	8.92786	7.92328	510.21	411.634	621.861	337.834	188.747	232.957	8.83116	8.72573	9.22669	8.3564	7.34801	8.06543
A_23_P353125	0.00526724	0.409971	2.00254	up	NM_152597	chr15:39909944-39893077	FSIP1	Homo sapiens fibrous sheath interacting protein 1 (FSIP1), mRNA [NM_152597]		NM_152597	Hs.129598	161835	46.4839	23.2679	5.52926	4.52743	50.2112	46.9354	42.305	22.3767	22.4002	25.0267	5.5263	5.66149	5.39999	4.32149	4.4068	4.85399

## Sheet: down_A673_sh4_vs_A673_scr
# Fold Change cut-off: 2.0 # P-value cut-off: 0.05 # Condition pairs: A673_sh4_vs_A673_scr # Column A: ProbeName it represents probe name. # Column B: P-value, P-value calculated from unpaired t-test. # Column C: FDR, FDR is calculated from Benjamini Hochberg FDR. # Column D: Fold change, the absolute ratio (no log scale) of normalized intensities between two conditions. # Column E: Regulation, i…
A673_sh4_vs_A673_scr 2.0 fold down regulated genes
	P-value and FDR		Fold change and Regulation		Annotations								Group--Raw Intensity		Group--Normalized Intensity		Raw Intensity						Normalized Intensity
ProbeName	P-value	FDR	Fold Change	Regulation	GenbankAccession	GenomicCoordinates	GeneSymbol	Description	Go	RefSeqAccession	UniGeneID	EntrezGeneID	group-A673_sh4(raw)	group-A673_scr(raw)	group-A673_sh4(normalized)	group-A673_scr(normalized)	[A673_sh4_1, A673_sh4](raw)	[A673_sh4_2, A673_sh4](raw)	[A673_sh4_3, A673_sh4](raw)	[A673_scr1, A673_scr](raw)	[A673_scr2, A673_scr](raw)	[A673_scr3, A673_scr](raw)	[A673_sh4_1, A673_sh4](normalized)	[A673_sh4_2, A673_sh4](normalized)	[A673_sh4_3, A673_sh4](normalized)	[A673_scr1, A673_scr](normalized)	[A673_scr2, A673_scr](normalized)	[A673_scr3, A673_scr](normalized)
A_33_P3326483	0.000859183	0.301693	88.9681	down	NM_004378	chr15:78640508-78640567	CRABP1	Homo sapiens cellular retinoic acid binding protein 1 (CRABP1), mRNA [NM_004378]	GO:0007165|GO:0005215|GO:0001972|GO:0016918|GO:0005501|GO:0007275|GO:0019841|GO:0005829	NM_004378	Hs.346950	1381	18.0635	1384.01	3.83291	10.3081	10.4212	8.05941	35.7099	1442.76	1926.7	782.553	3.22187	3.11842	5.15843	10.4705	10.7037	9.75014
A_23_P146233	0.000620384	0.282178	73.3187	down	NM_000237	chr8:19824187-19824246	LPL	Homo sapiens lipoprotein lipase (LPL), mRNA [NM_000237]	GO:0005515|GO:0004806|GO:0007603|GO:0005886|GO:0042627|GO:0070328|GO:0044281|GO:0031225|GO:0005615|GO:0034361|GO:0019432|GO:0006633|GO:0019433|GO:0008201|GO:0009986|GO:0010744|GO:0042493|GO:0005102|GO:0005576|GO:0004620|GO:0010886|GO:0004465|GO:0001523|GO:0031012|GO:0034372|GO:0034371|GO:0010890|GO:0042157|GO:0006641|GO:0034185|GO:0006644|GO:0017129	NM_000237	Hs.180878	4023	5	468.005	2.32668	8.52279	5	5	5	497.332	772.228	134.456	2.32271	2.33126	2.32609	8.91091	9.37713	7.28034
A_23_P36658	0.00202057	0.358224	49.9326	down	NM_145791	chr12:16516907-16516966	MGST1	Homo sapiens microsomal glutathione S-transferase 1 (MGST1), transcript variant 3, mRNA [NM_145791]	GO:0005515|GO:0006805|GO:0005783|GO:0042493|GO:0005743|GO:0045177|GO:0006749|GO:0010243|GO:0005634|GO:0005741|GO:0044281|GO:0004364|GO:0042803|GO:0071449|GO:0004602|GO:0005739|GO:0070207|GO:0043295|GO:0032496|GO:0005789|GO:0033327|GO:0016021|GO:0005778|GO:0055114	NM_145791	Hs.389700	4257	5.63581	382.633	2.48461	8.12652	5	5	6.90742	736.134	316.328	95.4387	2.32271	2.33126	2.79986	9.4841	8.08739	6.80806
A_23_P80718	0.000808343	0.300454	34.3701	down	NM_144642	chr3:63602485-63602544	SYNPR	Homo sapiens synaptoporin (SYNPR), transcript variant 2, mRNA [NM_144642]	GO:0043005|GO:0005215|GO:0030054|GO:0030672|GO:0016021	NM_144642	Hs.648668	132204	9.8615	338.36	3.14723	8.25031	11.491	5	13.0935	474.624	376.512	163.944	3.37482	2.33126	3.73561	8.84494	8.33521	7.57078
A_33_P3381751	0.000273588	0.247388	33.5184	down	NM_003253	chr21:32490889-32490830	TIAM1	Homo sapiens T-cell lymphoma invasion and metastasis 1 (TIAM1), mRNA [NM_003253]	GO:0051056|GO:0048011|GO:0043065|GO:0005886|GO:0048013|GO:0007264|GO:0035023|GO:0097190|GO:0005829|GO:0005543|GO:0046875|GO:0005911|GO:0005057|GO:0050772|GO:0005089	NM_003253	Hs.517228	7074	5	178.435	2.32668	7.39356	5	5	5	128.183	144.887	262.235	2.32271	2.33126	2.32609	6.96406	6.98088	8.23575
A_23_P252283	0.00141398	0.348206	32.9564	down	NM_032322	chr17:29326723-29326782	RNF135	Homo sapiens ring finger protein 135 (RNF135), transcript variant 1, mRNA [NM_032322]	GO:0005515|GO:0032728|GO:0005737|GO:0004842|GO:0016567|GO:0045087|GO:0045088|GO:0043021|GO:0008270|GO:0032480|GO:0005829	NM_032322	Hs.29874	84282	7.09943	287.615	2.82769	7.87017	5	7.63777	8.66052	534.906	211.112	116.828	2.32271	3.04154	3.11882	9.02484	7.49583	7.08986
A_23_P110403	0.00373493	0.377589	30.5216	down	NM_014476	chr4:186423262-186423203	PDLIM3	Homo sapiens PDZ and LIM domain 3 (PDLIM3), transcript variant 1, mRNA [NM_014476]	GO:0008092|GO:0007507|GO:0005515|GO:0030018|GO:0008270|GO:0007015|GO:0015629|GO:0008307	NM_014476	Hs.701364	27295	5	210.903	2.32668	7.25845	5	5	5	314.295	275.476	42.9387	2.32271	2.33126	2.32609	8.2502	7.87915	5.64598
A_23_P333951	0.0051778	0.409392	24.578	down	NM_144989	chr1:225155177-225155236	DNAH14	Homo sapiens dynein, axonemal, heavy chain 14 (DNAH14), transcript variant 3, mRNA [NM_144989]	GO:0030286|GO:0005874|GO:0035085|GO:0003777|GO:0005524|GO:0007018	NM_144989	Hs.133977	127602	10.3918	227.348	3.03817	7.65747	5.24626	5	20.9293	110.581	341.857	229.604	2.35771	2.33126	4.42554	6.73874	8.19471	8.03894
A_23_P387471	0.00044951	0.27008	22.9107	down	NM_005931	chr6:31478833-31478892	MICB	Homo sapiens MHC class I polypeptide-related sequence B (MICB), mRNA [NM_005931]	GO:0050689|GO:0005886|GO:0009408|GO:0009986|GO:0002429|GO:0046703|GO:0042267|GO:0046629|GO:0003823|GO:0001913|GO:0019882|GO:0019048|GO:0050776|GO:0019835|GO:0016021|GO:0032526|GO:0006979	NM_005931	Hs.731446	4277	16.5122	410.676	4.02229	8.54024	16.4469	20.0131	13.0765	630.421	373.511	228.096	3.91071	4.42441	3.73174	9.2658	8.3245	8.03041
A_23_P36882	0.00661467	0.427227	15.1865	down	NM_006183	chr12:86272164-86272223	NTS	Homo sapiens neurotensin (NTS), mRNA [NM_006183]	GO:0030133|GO:0005515|GO:0007165|GO:0050880|GO:0005576|GO:0005184	NM_006183	Hs.80962	4922	11.8311	208.392	3.39724	7.32195	20.2077	7.35652	7.9291	180.331	384.153	60.6906	4.20243	2.99088	2.99841	7.45889	8.35942	6.14756
A_23_P206733	0.0272219	0.579398	14.7153	down	NM_001266	chr16:55846905-55846846	CES1	Homo sapiens carboxylesterase 1 (CES1), transcript variant 3, mRNA [NM_001266]	GO:0052689|GO:0008152|GO:0009636|GO:0005788|GO:0047374	NM_001266	Hs.558865	1066	585.389	5099.21	8.28779	12.167	172.742	128.507	1454.92	3077.19	7738.36	4482.07	7.2875	7.10742	10.4685	11.5802	12.7201	12.2008
A_33_P3283964	0.0197231	0.553763	14.1602	down	NR_033740	chr16:55776729-55776788	CES1P2	Homo sapiens carboxylesterase 1 pseudogene 2 (CES1P2), non-coding RNA [NR_033740]		NR_033740	Hs.554599	390732	146.166	1381.23	6.46076	10.2845	54.3615	38.5684	345.569	846.012	2101.2	1196.49	5.63772	5.36654	8.37801	9.6913	10.8228	10.3394
A_23_P211680	0.00186574	0.349948	13.958	down	NM_015166	chr22:50498007-50497948	MLC1	Homo sapiens megalencephalic leukoencephalopathy with subcortical cysts 1 (MLC1), transcript variant 1, mRNA [NM_015166]	GO:0005515|GO:0005215|GO:0048471|GO:0005886|GO:0005783|GO:0072584|GO:0030136|GO:0005764|GO:0032403|GO:0051259|GO:0016323|GO:0005737|GO:0016324|GO:0071397|GO:0005911|GO:0006810|GO:0016192|GO:0006811|GO:0032388|GO:0031410|GO:0047484|GO:0005901|GO:0008565|GO:0045121|GO:0016021|GO:0055037|GO:0005769|GO:0005768	NM_015166	Hs.517729	23209	6.53263	97.6519	2.64175	6.44477	5	5	9.5979	54.8591	158.942	79.1542	2.32271	2.33126	3.2713	5.68742	7.11538	6.53151
A_23_P76364	0.0150337	0.528431	13.7441	down	NM_001769	chr12:6342625-6344426	CD9	Homo sapiens CD9 molecule (CD9), mRNA [NM_001769]	GO:0005515|GO:0008285|GO:0030913|GO:0005886|GO:0030168|GO:0006928|GO:0007338|GO:0016324|GO:0005178|GO:0005887|GO:0007342|GO:0007420|GO:0007596|GO:0014003|GO:0002576|GO:0009414|GO:0031092|GO:0007155|GO:0009897|GO:0032504	NM_001769	Hs.114286	928	7.55661	117.454	2.72454	6.50529	12.6698	5	5	31.5843	161.254	159.524	3.51629	2.33126	2.32609	4.84822	7.13406	7.53359
A_24_P20630	0.00215515	0.358224	13.6547	down	NM_016269	chr4:108968805-108968746	LEF1	Homo sapiens lymphoid enhancer-binding factor 1 (LEF1), transcript variant 1, mRNA [NM_016269]	GO:0005515|GO:0003700|GO:0044212|GO:0008013|GO:0006366|GO:0030307|GO:0001756|GO:0003705|GO:0032714|GO:0001755|GO:0032713|GO:0030879|GO:0021861|GO:0032993|GO:0016202|GO:0016055|GO:0043027|GO:0021542|GO:0022407|GO:0022408|GO:0000977|GO:0022409|GO:0030335|GO:0008301|GO:0033153|GO:0021879|GO:0030331|GO:0000122|GO:0030509|GO:0021873|GO:0043923|GO:0035326|GO:0001649|GO:0043392|GO:0043966|GO:0043967|GO:…	NM_016269	Hs.743478	51176	5.21422	80.4819	2.35145	6.12278	5.64264	5	5	36.4605	129.543	75.4426	2.39702	2.33126	2.32609	5.07342	6.83585	6.45908
A_23_P129064	0.000448454	0.27008	13.1924	down	NM_001482	chr15:45653514-45653455	GATM	Homo sapiens glycine amidinotransferase (L-arginine:glycine amidinotransferase) (GATM), mRNA [NM_001482]	GO:0007584|GO:0015068|GO:0016813|GO:0005743|GO:0043434|GO:0009790|GO:0044281|GO:0042246|GO:0005758|GO:0034641|GO:0006601|GO:0006600|GO:0046689|GO:0006979	NM_001482	Hs.75335	2628	25.179	339.568	4.60084	8.32247	27.6614	31.4804	16.3951	280.644	486.534	251.527	4.66308	5.07274	4.06668	8.08055	8.70805	8.17881
A_32_P87531	0.00167527	0.349948	13.0472	down	NM_001145154	chr1:225156479-225156538	DNAH14	Homo sapiens dynein, axonemal, heavy chain 14 (DNAH14), transcript variant 2, mRNA [NM_001145154]	GO:0030286|GO:0005874|GO:0035085|GO:0003777|GO:0005524|GO:0007018	NM_001145154	Hs.133977	127602	5.19636	75.0677	2.38912	6.09478	5	5	5.58908	37.9287	96.376	90.8983	2.32271	2.33126	2.5134	5.1344	6.41553	6.73443
A_23_P331928	0.0127882	0.504202	12.5417	down	NM_133493	chr6:74537828-74537887	CD109	Homo sapiens CD109 molecule (CD109), transcript variant 1, mRNA [NM_133493]	GO:0005886|GO:0004867|GO:0031225|GO:0005615	NM_133493	Hs.399891	135228	5	91.8224	2.32668	5.97535	5	5	5	197.06	56.0686	22.3388	2.32271	2.33126	2.32609	7.58542	5.6499	4.69072
A_33_P3241269	0.0450882	0.621418	12.4907	down	NM_001025195	chr16:55836823-55836764	CES1	Homo sapiens carboxylesterase 1 (CES1), transcript variant 1, mRNA [NM_001025195]	GO:0052689|GO:0008152|GO:0009636|GO:0005788|GO:0047374	NM_001025195	Hs.558865	1066	7485.38	45135.9	11.7859	15.4287	1919.56	1272.57	19264	29732	51939.1	53736.6	10.7679	10.3281	14.2616	14.9813	15.554	15.7507
A_23_P57268	0.00512928	0.409392	12.4843	down	NM_001338	chr21:18938329-18938388	CXADR	Homo sapiens coxsackie virus and adenovirus receptor (CXADR), transcript variant 1, mRNA [NM_001338]	GO:0005515|GO:0060044|GO:0043005|GO:0031594|GO:0030054|GO:0005886|GO:0008013|GO:0005634|GO:0030175|GO:0050900|GO:0005615|GO:0042802|GO:0030426|GO:0086067|GO:0007507|GO:0016323|GO:0051607|GO:0005912|GO:0010669|GO:0014704|GO:0005911|GO:0001618|GO:0050839|GO:0071253|GO:0070633|GO:0007157|GO:0008354|GO:0031532|GO:0001669|GO:0030593|GO:0005730|GO:0005102|GO:0005576|GO:0030165|GO:0045216|GO:0044297|GO:…	NM_001338	Hs.627078	1525	13.7155	196.854	3.74701	7.38905	14.7779	9.90886	16.4598	86.875	176.807	326.879	3.75322	3.41584	4.07196	6.37517	7.25611	8.53588
A_23_P14174	0.000183932	0.198371	12.3569	down	NM_006573	chr13:108922693-108922752	TNFSF13B	Homo sapiens tumor necrosis factor (ligand) superfamily, member 13b (TNFSF13B), transcript variant 1, mRNA [NM_006573]	GO:0005515|GO:0005164|GO:0008284|GO:0001782|GO:0005886|GO:0030890|GO:0008283|GO:0031296|GO:0031295|GO:0005102|GO:0005125|GO:0005615|GO:0007165|GO:0006955|GO:0042102|GO:0002636|GO:0016021|GO:0048305	NM_006573	Hs.525157	10673	15.8069	210.292	3.97678	7.60403	15.8383	14.3148	17.2675	196.228	310.831	123.818	3.85693	3.93242	4.14099	7.57787	8.06486	7.16936
A_24_P161973	0.00314056	0.367592	12.2732	down	NM_015205	chr13:113540918-113540977	ATP11A	Homo sapiens ATPase, class VI, type 11A (ATP11A), transcript variant 1, mRNA [NM_015205]	GO:0019829|GO:0005515|GO:0000287|GO:0005886|GO:0005783|GO:0004012|GO:0016021|GO:0055037|GO:0005765|GO:0005524|GO:0045332|GO:0005769	NM_015205	Hs.29189	23250	5.35098	71.1217	2.36996	5.98739	6.05295	5	5	36.084	66.1724	111.109	2.45253	2.33126	2.32609	5.05764	5.88802	7.01652
A_23_P168761	0.00289734	0.36726	12.1229	down	NM_002851	chr7:121701290-121701349	PTPRZ1	Homo sapiens protein tyrosine phosphatase, receptor-type, Z polypeptide 1 (PTPRZ1), transcript variant 1, mRNA [NM_002851]	GO:0005515|GO:0072534|GO:0006470|GO:0005887|GO:0005001|GO:0008330|GO:0005578|GO:0007409|GO:0007417	NM_002851	Hs.489824	5803	5	72.518	2.32668	5.92635	5	5	5	104.934	87.8813	24.7393	2.32271	2.33126	2.32609	6.65963	6.27946	4.83997
A_33_P3231739	0.00312992	0.367592	11.8231	down	NM_017770	chr6:10981073-10981014	ELOVL2	Homo sapiens ELOVL fatty acid elongase 2 (ELOVL2), mRNA [NM_017770]	GO:0005515|GO:0006636|GO:0005783|GO:0044281|GO:0035338|GO:0036109|GO:0033559|GO:0043651|GO:0009922|GO:0005789|GO:0019432|GO:0016021|GO:0034626|GO:0042761|GO:0044255	NM_017770	Hs.656436	54898	6.25334	84.5642	2.67134	6.23488	5	6.84616	6.91387	143.05	42.6912	67.951	2.32271	2.88903	2.80229	7.12174	5.28309	6.2998
A_33_P3415097	0.000935057	0.307017	11.1407	down	NM_001830	chrX:10205535-10205594	CLCN4	Homo sapiens chloride channel, voltage-sensitive 4 (CLCN4), transcript variant 1, mRNA [NM_001830]	GO:0006821|GO:0034220|GO:0015297|GO:0031901|GO:0005247|GO:0031902|GO:0006810|GO:0016021|GO:0055085|GO:0005524|GO:0005254|GO:0010008	NM_001830	Hs.495674	1183	5	61.9551	2.32668	5.80446	5	5	5	97.2223	56.8755	31.7676	2.32271	2.33126	2.32609	6.54839	5.67223	5.19275
A_23_P212050	0.00183128	0.349948	11.1313	down	NM_000055	chr3:165490878-165490819	BCHE	Homo sapiens butyrylcholinesterase (BCHE), mRNA [NM_000055]	GO:0003990|GO:0004104|GO:0005576|GO:0003824|GO:0005615|GO:0019695|GO:0007271|GO:0042802|GO:0001540|GO:0016020|GO:0005641|GO:0050783|GO:0005788|GO:0019899|GO:0044267	NM_000055	Hs.420483	590	9.31662	109.782	3.18149	6.65804	10.3909	10.4578	7.10117	176.67	67.5579	85.1175	3.21673	3.48947	2.83827	7.42383	5.92065	6.62963
A_33_P3389704	0.0223938	0.565244	10.5242	down	NM_001266	chr16:55860139-55860080	CES1	Homo sapiens carboxylesterase 1 (CES1), transcript variant 3, mRNA [NM_001266]	GO:0052689|GO:0008152|GO:0009636|GO:0005788|GO:0047374	NM_001266	Hs.558865	1066	79.8195	612.255	5.72668	9.12231	34.2314	24.9112	180.316	379.334	950.579	506.852	4.97499	4.73437	7.47067	8.51698	9.69316	9.1568
A_23_P167367	0.00371429	0.377589	10.3312	down	NM_153426	chr4:111538732-111538673	PITX2	Homo sapiens paired-like homeodomain 2 (PITX2), transcript variant 2, mRNA [NM_153426]	GO:0051219|GO:0005515|GO:0001191|GO:0060577|GO:0060578|GO:0003700|GO:0033189|GO:0003350|GO:0048536|GO:0035886|GO:0042803|GO:0031076|GO:0035993|GO:0016055|GO:0055009|GO:0030334|GO:0001102|GO:0000976|GO:0001105|GO:0003171|GO:0007520|GO:0000122|GO:0000978|GO:0001701|GO:0031490|GO:0002074|GO:0043388|GO:0055015|GO:0008134|GO:0035315|GO:0007368|GO:0061072|GO:0005634|GO:0060127|GO:0060126|GO:0005737|GO:…	NM_153426	Hs.643588	5308	5.2702	64.3991	2.40536	5.7743	5	5	5.8106	120.335	38.1836	34.6788	2.32271	2.33126	2.56213	6.86776	5.1378	5.31735
A_23_P3532	0.00161344	0.349948	10.0537	down	NM_004862	chr16:11642876-11642817	LITAF	Homo sapiens lipopolysaccharide-induced TNF factor (LITAF), transcript variant 1, mRNA [NM_004862]	GO:0005515|GO:0042347|GO:0005794|GO:0005886|GO:0006357|GO:0050699|GO:0006915|GO:0005765|GO:0001817|GO:0006351|GO:0007165|GO:0071222|GO:0004871|GO:0043123	NM_004862	Hs.459940	9516	20.7173	232.821	4.34004	7.6697	25.803	20.8615	15.4872	137.966	404.473	156.023	4.55537	4.48088	3.98387	7.07639	8.4314	7.50131
A_33_P3316786	0.0010806	0.314615	9.97677	down	NM_080759	chr13:72049898-72049839	DACH1	Homo sapiens dachshund homolog 1 (Drosophila) (DACH1), transcript variant 1, mRNA [NM_080759]	GO:0046545|GO:0005515|GO:0005667|GO:0030336|GO:0007585|GO:0008283|GO:0060244|GO:0048147|GO:0005730|GO:0005634|GO:0003677|GO:0001078|GO:0005737|GO:0001967|GO:0010944|GO:0000166|GO:0001075	NM_080759	Hs.129452	1602	5.45439	57.831	2.38838	5.70695	6.36317	5	5	77.3819	69.5857	26.5255	2.50779	2.33126	2.32609	6.2152	5.96237	4.94328
A_23_P22682	0.00989568	0.480434	9.97582	down	NM_016608	chrX:100809416-100809475	ARMCX1	Homo sapiens armadillo repeat containing, X-linked 1 (ARMCX1), mRNA [NM_016608]	GO:0016021	NM_016608	Hs.9728	51309	6.35034	76.5361	2.61037	5.9288	5.14279	5	8.90822	112.946	95.5567	21.1056	2.34845	2.33126	3.15139	6.77075	6.40103	4.61462
A_23_P154526	0.00084881	0.301557	9.59899	down	NM_004490	chr2:165349598-165349539	GRB14	Homo sapiens growth factor receptor-bound protein 14 (GRB14), mRNA [NM_004490]	GO:0007165|GO:0005737|GO:0005543|GO:0005886|GO:0000139|GO:0007596|GO:0005070|GO:0050900|GO:0010008|GO:0043231|GO:0005829	NM_004490	Hs.411881	2888	11.6096	104.131	3.41166	6.67454	18.7078	8.76746	7.35357	101.83	127.57	82.9915	4.09522	3.24402	2.89574	6.61595	6.8142	6.59348
A_24_P870620	0.00662104	0.427227	9.48456	down	NM_002825	chr7:136912112-136912079	PTN	Homo sapiens pleiotrophin (PTN), mRNA [NM_002825]	GO:0008284|GO:0005783|GO:0004864|GO:0007185|GO:0051781|GO:0030282|GO:0007612|GO:0008201|GO:0008083|GO:0005615|GO:0007399	NM_002825	Hs.371249	5764	7.52896	73.0143	2.72134	5.96692	12.5869	5	5	84.0645	107.42	27.5584	3.50668	2.33126	2.32609	6.33181	6.56982	4.99913
A_23_P145408	0.0425448	0.618136	9.19328	down	NM_032020	chr6:143816971-143816912	FUCA2	Homo sapiens fucosidase, alpha-L- 2, plasma (FUCA2), mRNA [NM_032020]	GO:0004560|GO:0005576|GO:0042806|GO:0006004|GO:0005764	NM_032020	Hs.17680	2519	5.36986	75.8895	2.37266	5.57324	6.10959	5	5	119.66	98.6646	9.34368	2.46062	2.33126	2.32609	6.86006	6.45183	3.40781
A_23_P33881	0.0118449	0.496995	9.17259	down	NM_001034832	chrX:48252313-48252372	SSX4B	Homo sapiens synovial sarcoma, X breakpoint 4B (SSX4B), transcript variant 1, mRNA [NM_001034832]	GO:0006355|GO:0005634|GO:0003676|GO:0006351	NM_001034832	Hs.648298	548313	10.7993	114.236	3.32954	6.52687	9.73779	6.58041	16.0797	167.782	141.098	33.8297	3.11503	2.83575	4.03784	7.34833	6.94945	5.28283
A_24_P374943	0.0157137	0.533486	9.15576	down	NM_001338	chr21:18924177-18924236	CXADR	Homo sapiens coxsackie virus and adenovirus receptor (CXADR), transcript variant 1, mRNA [NM_001338]	GO:0005515|GO:0060044|GO:0043005|GO:0031594|GO:0030054|GO:0005886|GO:0008013|GO:0005634|GO:0030175|GO:0050900|GO:0005615|GO:0042802|GO:0030426|GO:0086067|GO:0007507|GO:0016323|GO:0051607|GO:0005912|GO:0010669|GO:0014704|GO:0005911|GO:0001618|GO:0050839|GO:0071253|GO:0070633|GO:0007157|GO:0008354|GO:0031532|GO:0001669|GO:0030593|GO:0005730|GO:0005102|GO:0005576|GO:0030165|GO:0045216|GO:0044297|GO:…	NM_001338	Hs.627078	1525	11.1125	106.084	3.34293	6.53761	5.27956	10.7883	17.2696	51.8699	92.4378	173.943	2.36064	3.52645	4.14169	5.61014	6.35299	7.64969
A_23_P7313	0.000324273	0.26466	8.70514	down	NM_001040058	chr4:88903920-88903979	SPP1	Homo sapiens secreted phosphoprotein 1 (SPP1), transcript variant 1, mRNA [NM_001040058]	GO:0048471|GO:0007566|GO:0010811|GO:0030593|GO:0031988|GO:0050840|GO:0045177|GO:0005576|GO:0033280|GO:0042995|GO:0048545|GO:0005125|GO:0005615|GO:0031214|GO:0001649|GO:0048685|GO:0046697|GO:0006954|GO:0045780|GO:0030198|GO:0007155	NM_001040058	Hs.313	6696	6.75634	58.0019	2.69457	5.81644	10.137	5.02611	5.10592	62.9381	69.9179	41.1498	3.17994	2.47952	2.42425	5.8983	5.97007	5.58093
A_23_P320739	0.00985991	0.479468	8.47573	down	NM_002397	chr5:88016876-88016817	MEF2C	Homo sapiens myocyte enhancer factor 2C (MEF2C), transcript variant 1, mRNA [NM_002397]	GO:0000987|GO:0005515|GO:0003700|GO:0000983|GO:0000981|GO:0003705|GO:0003139|GO:0003185|GO:0003138|GO:0001947|GO:0007507|GO:0002756|GO:0002062|GO:0000165|GO:0014033|GO:0002755|GO:0007611|GO:0033197|GO:0002467|GO:0021542|GO:0014902|GO:0030501|GO:0000977|GO:0034134|GO:0000122|GO:0007521|GO:0002224|GO:0001649|GO:0001958|GO:0007517|GO:0007519|GO:0010694|GO:0005654|GO:0034162|GO:0034142|GO:0001782|GO:…	NM_002397	Hs.649965	4208	5.60904	57.5123	2.41806	5.5014	6.82713	5	5	103.463	51.4728	17.6008	2.59684	2.33126	2.32609	6.63881	5.51606	4.34933
A_33_P3227920	0.00179079	0.349948	8.23683	down	NM_004696	chr1:110905674-110905615	SLC16A4	Homo sapiens solute carrier family 16, member 4 (SLC16A4), transcript variant 1, mRNA [NM_004696]	GO:0015718|GO:0016020|GO:0005887|GO:0008028|GO:0015293	NM_004696	Hs.351306	9122	59.1874	542.391	5.86817	8.91026	57.7187	51.2522	68.5913	712.899	669.771	244.504	5.73297	5.78046	6.09109	9.44009	9.15567	8.13502
A_23_P126706	0.000746289	0.296532	7.98936	down	NM_004673	chr1:178820318-178820259	ANGPTL1	Homo sapiens angiopoietin-like 1 (ANGPTL1), mRNA [NM_004673]	GO:0005102|GO:0007169|GO:0005615	NM_004673	Hs.591474	9068	6.92413	55.3429	2.70004	5.69812	8.9894	5	6.78299	67.5386	66.8342	31.6559	2.99627	2.33126	2.7726	6.00449	5.90188	5.18799
A_23_P30254	0.0122321	0.501201	7.98193	down	NM_006622	chr5:57750052-57749993	PLK2	Homo sapiens polo-like kinase 2 (PLK2), transcript variant 1, mRNA [NM_006622]	GO:0005515|GO:0043066|GO:0005813|GO:0007093|GO:0032486|GO:0005814|GO:0060291|GO:0007265|GO:0060292|GO:0046599|GO:0005524|GO:0030425|GO:0005622|GO:0000082|GO:0048167|GO:0004674|GO:0006468|GO:0007613|GO:0004871|GO:0043123|GO:0007052	NM_006622	Hs.398157	10769	14.8847	95.7486	3.5399	6.53663	27.273	5	12.381	115.513	107.034	64.6985	4.64346	2.33126	3.64498	6.81132	6.56504	6.23354
A_32_P25437	0.000409873	0.27008	7.93382	down	NM_001046	chr5:127524728-127524787	SLC12A2	Homo sapiens solute carrier family 12 (sodium/potassium/chloride transporter), member 2 (SLC12A2), transcript variant 1, mRNA [NM_001046]	GO:0005515|GO:0030321|GO:0005886|GO:0015696|GO:0060763|GO:0055085|GO:0016323|GO:0016324|GO:0035264|GO:0016020|GO:0005887|GO:0050910|GO:0051739|GO:0006810|GO:0070634|GO:0006814|GO:0006813|GO:0060444|GO:0006811|GO:0008511	NM_001046	Hs.162585	6558	8.3324	63.958	3.00126	5.98928	9.77035	9.74305	5.48379	61.9033	70.9688	59.0018	3.12029	3.39309	2.4904	5.87351	5.99019	6.10413
A_23_P350005	0.0110262	0.49402	7.57053	down	NM_173553	chr4:189012558-189012499	TRIML2	Homo sapiens tripartite motif family-like 2 (TRIML2), mRNA [NM_173553]	GO:0016567|GO:0016874|GO:0032526	NM_173553	Hs.276429	205860	10.5389	72.896	3.20216	6.12255	10.5076	5	16.109	66.2784	49.4101	102.999	3.23411	2.33126	4.0411	5.97648	5.46785	6.92333
A_24_P226332	0.0190403	0.547498	7.46369	down	NM_004440	chr6:93950539-93950480	EPHA7	Homo sapiens EPH receptor A7 (EPHA7), mRNA [NM_004440]	GO:0031290|GO:0005515|GO:0031594|GO:0050730|GO:0030425|GO:0031952|GO:0005004|GO:0043525|GO:0045211|GO:0043025|GO:0070372|GO:0022407|GO:0048013|GO:0050919|GO:0018108|GO:0005524|GO:0016310|GO:0045499|GO:0043281|GO:0046875|GO:0007420|GO:0005887|GO:0048755|GO:0004713|GO:0008046	NM_004440	Hs.73962	2045	8.19492	78.9069	2.97743	5.87732	9.64199	5.49195	9.45082	159.664	53.3105	23.7463	3.09833	2.59109	3.24287	7.27843	5.56925	4.78427
A_24_P141629	0.00339865	0.377589	7.39618	down	NM_022074	chr11:58921635-58921694	FAM111A	Homo sapiens family with sequence similarity 111, member A (FAM111A), transcript variant 1, mRNA [NM_022074]	GO:0005515|GO:0051607|GO:0005737|GO:0019048|GO:0000087|GO:0005634|GO:0003824|GO:0045071	NM_022074	Hs.150651	63901	26.0256	195.745	4.61885	7.50563	18.266	21.9466	37.8643	287.665	182.361	117.208	4.06056	4.55509	5.24091	8.12116	7.30001	7.09574
A_23_P209625	0.000526731	0.279219	7.36165	down	NM_000104	chr2:38295503-38295444	CYP1B1	Homo sapiens cytochrome P450, family 1, subfamily B, polypeptide 1 (CYP1B1), mRNA [NM_000104]	GO:0019369|GO:0006725|GO:0006805|GO:0070330|GO:0005506|GO:0019373|GO:0061298|GO:0071603|GO:0009636|GO:0044281|GO:0001525|GO:0004497|GO:0019825|GO:0043542|GO:0097267|GO:0005789|GO:0016712|GO:0009404|GO:0016125|GO:0007601|GO:0008202|GO:0055114|GO:0020037	NM_000104	Hs.154654	1545	29.2766	216.101	4.84605	7.72608	36.936	27.761	23.1327	191.546	201.147	255.61	5.08711	4.88941	4.56164	7.54837	7.43216	8.19772
A_23_P501007	0.00841001	0.458974	7.26463	down	NM_001039348	chr2:56093847-56093788	EFEMP1	Homo sapiens EGF containing fibulin-like extracellular matrix protein 1 (EFEMP1), transcript variant 2, mRNA [NM_001039348]	GO:0005515|GO:0005154|GO:0006355|GO:0005509|GO:0005578|GO:0005576|GO:0018108|GO:0005615|GO:0031012|GO:0005006|GO:0007173|GO:0030198|GO:0032331|GO:0007601|GO:0008083	NM_001039348	Hs.76224	2202	5	45.7084	2.32668	5.18757	5	5	5	42.3279	79.7286	15.0686	2.32271	2.33126	2.32609	5.30564	6.14756	4.10952
A_23_P374226	0.0119551	0.496995	7.0986	down	NM_173358	chrX:52681333-52679425	SSX7	Homo sapiens synovial sarcoma, X breakpoint 7 (SSX7), mRNA [NM_173358]	GO:0006355|GO:0005634|GO:0003676|GO:0006351	NM_173358	Hs.558712	280658	5	44.4777	2.32668	5.15422	5	5	5	76.7715	42.8963	13.7654	2.32271	2.33126	2.32609	6.20115	5.28884	3.97266
A_33_P3287223	0.00103368	0.313733	7.04339	down	NM_001935	chr2:162849045-162848986	DPP4	Homo sapiens dipeptidyl-peptidase 4 (DPP4), mRNA [NM_001935]	GO:0005515|GO:0008284|GO:0005886|GO:0004252|GO:0031295|GO:0030139|GO:0005765|GO:0002020|GO:0010716|GO:0042803|GO:0042802|GO:0046581|GO:0016324|GO:0071438|GO:0006508|GO:0007155|GO:0070062|GO:0001666|GO:0009986|GO:0031258|GO:0005102|GO:0033632|GO:0030027|GO:0042110|GO:0043542|GO:0004177|GO:0008236|GO:0045121|GO:0016021|GO:0008239	NM_001935	Hs.368912	1803	5	36.2713	2.32668	5.14295	5	5	5	34.1282	27.5737	47.1121	2.32271	2.33126	2.32609	4.96435	4.68216	5.78235
A_23_P35066	0.00179872	0.349948	7.01011	down	NM_015976	chr1:99225718-99225777	SNX7	Homo sapiens sorting nexin 7 (SNX7), transcript variant 1, mRNA [NM_015976]	GO:0005515|GO:0007154|GO:0035091|GO:0015031|GO:0030659	NM_015976	Hs.197015	51375	29.9389	232.971	4.89737	7.70681	31.5075	27.0324	31.2768	324.533	264.413	109.968	4.85505	4.85169	4.98537	8.29885	7.81857	7.00301
A_32_P55135	0.0104143	0.484805	6.98055	down	NM_005635	chrX:48126476-48126535	SSX1	Homo sapiens synovial sarcoma, X breakpoint 1 (SSX1), transcript variant 2, mRNA [NM_005635]	GO:0006355|GO:0003714|GO:0005634|GO:0003676|GO:0006351	NM_005635	Hs.434142	6756	5.18425	44.9245	2.38704	5.19038	5	5	5.55276	63.6944	57.3271	13.7519	2.32271	2.33126	2.50716	5.91533	5.68441	3.9714
A_23_P252556	0.041978	0.618136	6.66916	down	NM_001704	chr6:70098866-70098925	BAI3	Homo sapiens brain-specific angiogenesis inhibitor 3 (BAI3), mRNA [NM_001704]	GO:0007186|GO:0005886|GO:0007218|GO:0004930|GO:0016525|GO:0016021	NM_001704	Hs.13261	577	8.89816	64.7952	2.86369	5.6012	16.6945	5	5	120.644	57.207	16.5343	3.93374	2.33126	2.32609	6.8737	5.67948	4.25042
A_33_P3379606	0.00248347	0.36105	6.62317	down	NM_001029875	chr5:63908039-63908098	RGS7BP	Homo sapiens regulator of G-protein signaling 7 binding protein (RGS7BP), transcript variant 1, mRNA [NM_001029875]	GO:0005737|GO:0007186|GO:0005886|GO:0005634|GO:0009968	NM_001029875	Hs.657133	401190	5	34.6421	2.32668	5.05421	5	5	5	32.2017	23.2597	48.465	2.32271	2.33126	2.32609	4.87876	4.4609	5.82296
A_32_P52018	0.0031801	0.369357	6.46826	down	NM_030948	chr6:13278552-13283703	PHACTR1	Homo sapiens phosphatase and actin regulator 1 (PHACTR1), transcript variant 1, mRNA [NM_030948]	GO:0005737|GO:0030054|GO:0031532|GO:0048870|GO:0004864|GO:0043149|GO:0045202|GO:0031032|GO:0005634|GO:0003779|GO:0005829	NM_030948	Hs.436996	221692	5.19968	36.205	2.42238	5.11576	5	5.59903	5	35.2416	23.1615	50.2119	2.32271	2.61836	2.32609	5.01874	4.45256	5.87599
A_33_P3358397	9.1546e-07	0.00921502	6.37362	down	NM_018176	chr4:25000598-25000539	LGI2	Homo sapiens leucine-rich repeat LGI family, member 2 (LGI2), mRNA [NM_018176]	GO:0005576	NM_018176	Hs.12488	55203	5	32.468	2.32668	4.9988	5	5	5	33.1507	37.1238	27.1294	2.32271	2.33126	2.32609	4.92045	5.09926	4.97669
A_33_P3255929	0.00642433	0.424013	6.34548	down	XR_244997	chr2:45148275-45148216	LOC100130502	PREDICTED: Homo sapiens uncharacterized LOC100130502 (LOC100130502), misc_RNA [XR_244997]		XR_244997	Hs.436392	100130502	5.21854	37.7824	2.35229	5.01802	5.65562	5	5	61.6931	36.627	15.0272	2.39951	2.33126	2.32609	5.86953	5.07875	4.10577
A_33_P3329378	6.75418e-05	0.185421	6.30496	down	NM_014461	chr3:1445158-1445217	CNTN6	Homo sapiens contactin 6 (CNTN6), mRNA [NM_014461]	GO:0007219|GO:0005886|GO:0007411|GO:0031225|GO:0007417|GO:0007155	NM_014461	Hs.387300	27255	41.0314	261.394	5.34518	8.00167	41.9758	35.8656	45.2529	234.129	283.235	266.817	5.27117	5.26189	5.50249	7.81997	7.92372	8.26131
A_23_P65307	0.00754519	0.445019	6.13688	down	NM_032229	chr13:86368069-86368010	SLITRK6	Homo sapiens SLIT and NTRK-like family, member 6 (SLITRK6), mRNA [NM_032229]	GO:0016021|GO:0007409	NM_032229	Hs.525105	84189	5	34.0538	2.32668	4.94419	5	5	5	17.3176	41.4684	43.3753	2.32271	2.33126	2.32609	3.92223	5.24966	5.66068
A_23_P41194	0.000983563	0.307017	6.11115	down	NM_153353	chr3:169511485-169511426	LRRC34	Homo sapiens leucine rich repeat containing 34 (LRRC34), transcript variant 3, mRNA [NM_153353]	GO:0008150|GO:0003674|GO:0005575	NM_153353	Hs.591289	151827	7.74975	45.5814	2.88058	5.49203	8.85909	9.39015	5	51.1761	47.1154	38.4527	2.97217	3.34349	2.32609	5.59149	5.4092	5.4754
A_23_P95029	0.0253703	0.574608	5.92726	down	NM_021021	chr8:121550176-121550117	SNTB1	Homo sapiens syntrophin, beta 1 (dystrophin-associated protein A1, 59kDa, basic component 1) (SNTB1), mRNA [NM_021021]	GO:0005515|GO:0005516|GO:0030054|GO:0045202|GO:0003779|GO:0030165|GO:0042383|GO:0043234|GO:0005737|GO:0005543|GO:0006936|GO:0016010|GO:0005856	NM_021021	Hs.46701	6641	5	38.9111	2.32668	4.89405	5	5	5	67.2567	39.6006	9.87611	2.32271	2.33126	2.32609	5.99765	5.19083	3.49367
A_23_P256470	0.0195003	0.551263	5.66864	down	NM_000905	chr7:24331284-24331343	NPY	Homo sapiens neuropeptide Y (NPY), mRNA [NM_000905]	GO:0008343|GO:0007631|GO:0021987|GO:0001664|GO:0008283|GO:0004930|GO:0005246|GO:0008015|GO:0007586|GO:0032100|GO:0021954|GO:0005102|GO:0005623|GO:0006928|GO:0007268|GO:0005576|GO:0005615|GO:0031175|GO:0007187|GO:0007218|GO:0008217|GO:0007610|GO:0006816|GO:0005184	NM_000905	Hs.1832	4852	38.5165	250.082	5.19595	7.69895	26.2033	52.8136	36.5324	464.651	169.122	116.474	4.5809	5.81818	5.18877	8.81382	7.19745	7.08559
A_23_P213699	0.00567359	0.413263	5.63998	down	NM_013982	chr5:139227327-139227268	NRG2	Homo sapiens neuregulin 2 (NRG2), transcript variant 3, mRNA [NM_013982]	GO:0048011|GO:0005886|GO:0048015|GO:0005102|GO:0005576|GO:0009790|GO:0007165|GO:0007173|GO:0008543|GO:0045087|GO:0016021|GO:0008083|GO:0038095	NM_013982	Hs.408515	9542	23.6522	145.012	4.54342	7.03911	24.826	19.2143	26.9163	74.1803	199.952	160.904	4.4989	4.3716	4.75976	6.14722	7.42288	7.54723
A_23_P21324	0.0260574	0.576977	5.62282	down	NM_001271893	chr2:239832044-239832103	TWIST2	Homo sapiens twist family bHLH transcription factor 2 (TWIST2), transcript variant 1, mRNA [NM_001271893]	GO:0005515|GO:0005667|GO:0010838|GO:0043066|GO:0003700|GO:0008285|GO:0019904|GO:0032720|GO:0005634|GO:0000122|GO:0048701|GO:0003677|GO:0001649|GO:0043392|GO:0061303|GO:0005737|GO:0045668|GO:0001076|GO:0060325|GO:0045638|GO:0003682|GO:0046983|GO:0045892	NM_001271893	Hs.422585	117581	5	36.9384	2.32668	4.81798	5	5	5	50.2397	51.4408	9.13449	2.32271	2.33126	2.32609	5.56622	5.51369	3.37403
A_24_P197537	0.0373318	0.608824	5.30638	down	NM_003719	chr5:76722793-76722852	PDE8B	Homo sapiens phosphodiesterase 8B (PDE8B), transcript variant 1, mRNA [NM_003719]	GO:0006355|GO:0009187|GO:0004114|GO:0000156|GO:0005575|GO:0046676|GO:0046872|GO:0006198|GO:0005829	NM_003719	Hs.584830	8622	45.0081	217.264	5.20245	7.61018	29.0829	20.5679	85.3734	108.972	237.494	305.328	4.73878	4.46116	6.4074	6.72272	7.66962	8.43819
A_23_P374844	0.035139	0.601944	5.27953	down	NM_015973	chr11:68458533-68458592	GAL	Homo sapiens galanin/GMAP prepropeptide (GAL), mRNA [NM_015973]	GO:0005515|GO:0032868|GO:0007631|GO:0043627|GO:0043065|GO:0005794|GO:0042493|GO:0005576|GO:0005575|GO:0050672|GO:0007399|GO:0006939|GO:0006954|GO:0007218|GO:0030252|GO:0005184|GO:0030141|GO:0031943|GO:0030073	NM_015973	Hs.278959	51083	45.0092	289.168	5.45795	7.85836	49.8507	33.1901	51.9867	88.3605	362.57	416.573	5.51766	5.15351	5.70267	6.40103	8.28377	8.89028
A_33_P3290040	0.0236938	0.565244	5.11889	down	NM_001199752	chr19:50216867-50216926	CPT1C	Homo sapiens carnitine palmitoyltransferase 1C (CPT1C), transcript variant 3, mRNA [NM_001199752]	GO:0030054|GO:0006635|GO:0004095|GO:0032281|GO:0045202|GO:0005741	NM_001199752	Hs.112195	126129	27.9176	178.303	4.78033	7.13616	27.2041	23.2839	33.2648	357.191	96.6021	81.1149	4.63973	4.64435	5.05691	8.42976	6.41808	6.56064
A_24_P940166	0.00196146	0.354683	5.1061	down	NM_001015880	chr10:89506954-89507013	PAPSS2	Homo sapiens 3'-phosphoadenosine 5'-phosphosulfate synthase 2 (PAPSS2), transcript variant 2, mRNA [NM_001015880]	GO:0006805|GO:0050427|GO:0050428|GO:0005975|GO:0016779|GO:0044281|GO:0005524|GO:0005829|GO:0060348|GO:0001501|GO:0004020|GO:0007596|GO:0000103|GO:0004781|GO:0030203	NM_001015880	Hs.524491	9060	34.0568	182.324	5.05042	7.40264	36.5492	24.8749	40.7463	233.397	213.051	100.524	5.07192	4.73241	5.34693	7.8153	7.50743	6.88519
A_23_P154875	0.00694968	0.438672	5.09193	down	NM_012105	chr21:42647696-42647755	BACE2	Homo sapiens beta-site APP-cleaving enzyme 2 (BACE2), transcript variant a, mRNA [NM_012105]	GO:0005794|GO:0016486|GO:0009986|GO:0005783|GO:0006508|GO:0016021|GO:0006509|GO:0004190|GO:0042985|GO:0005768	NM_012105	Hs.529408	25825	17.7804	96.5299	4.14109	6.4893	19.03	14.8489	19.4623	54.9911	103.906	130.692	4.12054	3.98765	4.31508	5.69149	6.52793	7.24849
A_23_P134835	9.28064e-06	0.0560514	5.0728	down	NM_018371	chr8:19262014-19261955	CSGALNACT1	Homo sapiens chondroitin sulfate N-acetylgalactosaminyltransferase 1 (CSGALNACT1), transcript variant 2, mRNA [NM_018371]	GO:0008037|GO:0051216|GO:0008283|GO:0044281|GO:0015014|GO:0009653|GO:0046872|GO:0005622|GO:0030206|GO:0030198|GO:0032580|GO:0030204|GO:0047238|GO:0030203|GO:0047237|GO:0050653|GO:0008955|GO:0050650|GO:0050651|GO:0005975|GO:0019276|GO:0015020|GO:0008376|GO:0007399|GO:0030166|GO:0001958|GO:0030173|GO:0000139|GO:0046398|GO:0030210	NM_018371	Hs.613729	55790	5	25.5865	2.32668	4.66947	5	5	5	27.0885	25.0547	24.6162	2.32271	2.33126	2.32609	4.61644	4.5602	4.83176
A_24_P109214	0.0339193	0.599317	5.0458	down	NM_001645	chr19:45422436-45422495	APOC1	Homo sapiens apolipoprotein C-I (APOC1), mRNA [NM_001645]	GO:0032375|GO:0006629|GO:0050995|GO:0005783|GO:0010900|GO:0010873|GO:0042627|GO:0034379|GO:0060228|GO:0034361|GO:0034364|GO:0034382|GO:0055102|GO:0034447|GO:0008203|GO:0033344|GO:0005504|GO:0004859|GO:0032374|GO:0045717|GO:0031210|GO:0034369|GO:0051005|GO:0010916|GO:0033700|GO:0048261|GO:0034375|GO:0042157|GO:0006641|GO:0045833	NM_001645	Hs.110675	341	21.414	133.994	4.41697	6.75206	21.2964	19.264	23.6816	42.0336	198.673	161.275	4.28029	4.3754	4.59523	5.29191	7.41382	7.55043
A_23_P393620	0.0084481	0.458974	4.9507	down	NM_006528	chr7:93516634-93516575	TFPI2	Homo sapiens tissue factor pathway inhibitor 2 (TFPI2), transcript variant 1, mRNA [NM_006528]	GO:0007596|GO:0004867|GO:0005578|GO:0005201	NM_006528	Hs.438231	7980	76.692	347.006	6.07489	8.38252	128.893	62.2391	38.9445	393.509	398.097	249.413	6.88486	6.05723	5.28256	8.57158	8.41169	8.16429
A_23_P210210	0.0477973	0.626281	4.92094	down	NM_001430	chr2:46613666-46613725	EPAS1	Homo sapiens endothelial PAS domain protein 1 (EPAS1), mRNA [NM_001430]	GO:0005515|GO:0006366|GO:0030324|GO:0061418|GO:0005829|GO:0042415|GO:0045944|GO:0048469|GO:0043129|GO:0004871|GO:0048625|GO:0035035|GO:0005667|GO:0001666|GO:0046982|GO:0071456|GO:0001892|GO:0043619|GO:0001525|GO:0003677|GO:0043565|GO:0007165|GO:0001077|GO:0002027|GO:0001974|GO:0030218|GO:0005654|GO:0007005|GO:0007601|GO:0008134	NM_001430	Hs.468410	2034	317.977	1364.88	7.94806	10.247	298.677	96.8211	558.432	699.638	1629.64	1765.35	8.0599	6.70237	9.08191	9.41064	10.457	10.8733
A_23_P83098	0.00284513	0.366548	4.7869	down	NM_000689	chr9:75516195-75516136	ALDH1A1	Homo sapiens aldehyde dehydrogenase 1 family, member A1 (ALDH1A1), mRNA [NM_000689]	GO:0005099|GO:0005737|GO:0006805|GO:0032320|GO:0001758|GO:0006069|GO:0042572|GO:0006081|GO:0004029|GO:0044281|GO:0005497|GO:0005829	NM_000689	Hs.76392	216	18.9363	94.034	4.1926	6.45169	21.8794	12.4898	22.4396	74.3204	142.515	65.267	4.3194	3.73896	4.51943	6.15117	6.95868	6.24521
A_33_P3216869	0.00261516	0.36105	4.66143	down	NM_004378	chr15:78640361-78640420	CRABP1	Homo sapiens cellular retinoic acid binding protein 1 (CRABP1), mRNA [NM_004378]	GO:0007165|GO:0005215|GO:0001972|GO:0016918|GO:0005501|GO:0007275|GO:0019841|GO:0005829	NM_004378	Hs.346950	1381	113.735	577.324	6.81151	9.03229	104.254	110.484	126.466	565.794	855.716	310.461	6.57886	6.88763	6.96805	9.09996	9.53344	8.46346
A_33_P3640690	0.0062469	0.424013	4.64493	down	NM_001128128	chr10:31816261-31816320	ZEB1	Homo sapiens zinc finger E-box binding homeobox 1 (ZEB1), transcript variant 1, mRNA [NM_001128128]	GO:0005515|GO:0007389|GO:0003700|GO:0008285|GO:0010464|GO:0051216|GO:0008283|GO:0071560|GO:0033081|GO:0048704|GO:0005634|GO:0048752|GO:0048596|GO:0005737|GO:0006955|GO:0003690|GO:0071230|GO:0030857|GO:0045944|GO:0090103|GO:0031667|GO:0017015|GO:0005667|GO:0014823|GO:0051150|GO:0006357|GO:0003714|GO:0003713|GO:0005730|GO:0070888|GO:0000122|GO:0006351|GO:0043565|GO:0045666|GO:0003682|GO:0008270|GO:…	NM_001128128	Hs.124503	6935	11.2804	50.8074	3.42068	5.63633	10.448	7.51936	15.8738	42.7745	45.7888	63.859	3.22484	3.01794	4.01926	5.32202	5.3711	6.21588
A_33_P3298216	0.0174544	0.539098	4.60334	down	NM_001198950	chr13:109860282-109860341	MYO16	Homo sapiens myosin XVI (MYO16), transcript variant 1, mRNA [NM_001198950]	GO:0048471|GO:0008285|GO:0005886|GO:0019903|GO:0005730|GO:2000134|GO:0005634|GO:0021549|GO:0016459|GO:0005524|GO:0014065|GO:0005829|GO:0003774|GO:0005737|GO:0051015|GO:0048812|GO:0005654	NM_001198950	Hs.656587	23026	5	25.754	2.32668	4.52937	5	5	5	14.2921	22.3863	40.5835	2.32271	2.33126	2.32609	3.62027	4.40579	5.56204
A_23_P399078	0.0166858	0.538202	4.59785	down	NM_000362	chr22:33258540-33258599	TIMP3	Homo sapiens TIMP metallopeptidase inhibitor 3 (TIMP3), mRNA [NM_000362]	GO:0031012|GO:0005515|GO:0051045|GO:0071310|GO:0008191|GO:0007601|GO:0046872|GO:0005604	NM_000362	Hs.644633	7078	7.36053	39.0182	2.84381	5.04477	8.10845	5.53633	8.43681	63.6709	38.8057	14.578	2.84558	2.60487	3.08097	5.91457	5.16024	4.05949
A_23_P202978	0.0211012	0.563407	4.56911	down	NM_033292	chr11:104897602-104897058	CASP1	Homo sapiens caspase 1, apoptosis-related cysteine peptidase (CASP1), transcript variant alpha, mRNA [NM_033292]	GO:0005515|GO:0035872|GO:0005829|GO:0050717|GO:0016485|GO:0050718|GO:0006508|GO:0033198|GO:0043123|GO:0072559|GO:0001666|GO:0006919|GO:0071310|GO:0072557|GO:0072558|GO:0006915|GO:0005576|GO:0008656|GO:0051882|GO:0004197|GO:0007165|GO:0060081|GO:0045087|GO:0032611|GO:0071260|GO:0097169	NM_033292	Hs.2490	834	39.145	177.866	5.10699	7.2989	61.6956	17.6741	38.0652	119.759	304.375	109.465	5.83231	4.24008	5.24857	6.86223	8.03616	6.9983
A_23_P103486	0.0202866	0.558447	4.56821	down	NM_000775	chr1:60359279-60359220	CYP2J2	Homo sapiens cytochrome P450, family 2, subfamily J, polypeptide 2 (CYP2J2), mRNA [NM_000775]	GO:0019369|GO:0008392|GO:0006805|GO:0070330|GO:0005506|GO:0019373|GO:0008016|GO:0071614|GO:0044281|GO:0006690|GO:0043651|GO:0005789|GO:0008405|GO:0008404|GO:0020037	NM_000775	Hs.152096	1573	22.2456	112.295	4.44895	6.64058	21.204	18.4864	27.0463	56.8367	102.083	177.965	4.27242	4.30767	4.76676	5.73984	6.49865	7.68325
A_23_P165624	0.0043385	0.391846	4.56518	down	NM_007115	chr2:152226595-152226654	TNFAIP6	Homo sapiens tumor necrosis factor, alpha-induced protein 6 (TNFAIP6), mRNA [NM_007115]	GO:0007165|GO:0006954|GO:0005540|GO:0007267|GO:0007155	NM_007115	Hs.437322	7130	473.403	2088.55	8.74854	10.9392	427.569	302.261	690.38	1716.09	2888.91	1660.66	8.56735	8.29397	9.38429	10.7107	11.3064	10.8005
A_32_P47643	0.00175494	0.349948	4.49762	down	NM_001077710	chr2:38915-38856	FAM110C	Homo sapiens family with sequence similarity 110, member C (FAM110C), mRNA [NM_001077710]	GO:0005515|GO:0051897|GO:0000922|GO:0030335|GO:0005815|GO:0043014|GO:0005874|GO:0060491|GO:0005634|GO:0005938	NM_001077710	Hs.8379	642273	5	23.5711	2.32668	4.49585	5	5	5	34.6016	16.1437	19.968	2.32271	2.33126	2.32609	4.98721	3.97659	4.52374
A_23_P354705	0.00108351	0.314615	4.48951	down	NM_003034	chr12:22354130-22354071	ST8SIA1	Homo sapiens ST8 alpha-N-acetyl-neuraminide alpha-2,8-sialyltransferase 1 (ST8SIA1), mRNA [NM_003034]	GO:0034605|GO:0003828|GO:0030173|GO:0008373|GO:0008284|GO:0005975|GO:0006688|GO:0006486|GO:0016021	NM_003034	Hs.408614	6489	5	24.1394	2.32668	4.49324	5	5	5	29.1462	29.4444	13.8276	2.32271	2.33126	2.32609	4.72572	4.7739	3.98011
A_23_P68155	0.0037442	0.377589	4.48777	down	NM_022168	chr2:163128865-163128806	IFIH1	Homo sapiens interferon induced with helicase C domain 1 (IFIH1), mRNA [NM_022168]	GO:0003725|GO:0005515|GO:0032728|GO:0003727|GO:0034344|GO:0032727|GO:0016925|GO:0004386|GO:0042981|GO:0005634|GO:0009615|GO:0003677|GO:0005524|GO:0005829|GO:0005737|GO:0045087|GO:0039528|GO:0019048|GO:0043021|GO:0009597|GO:0008270|GO:0032480	NM_022168	Hs.163173	64135	6.49809	30.4604	2.65493	4.82093	7.84343	6.65085	5	44.6108	29.8618	16.9086	2.78877	2.84993	2.32609	5.38376	4.79186	4.28716
A_23_P111402	0.00215558	0.358224	4.4795	down	NM_032784	chr6:127518034-127518093	RSPO3	Homo sapiens R-spondin 3 (RSPO3), mRNA [NM_032784]	GO:0005109|GO:0060670|GO:0005102|GO:0005576|GO:0060070|GO:0008201	NM_032784	Hs.135254	84870	6.20552	27.1208	2.58817	4.75151	5	5	8.61657	27.0156	25.2307	29.1162	2.32271	2.33126	3.11055	4.61166	4.56722	5.07565
A_23_P252541	0.0470988	0.626281	4.47427	down	NM_177403		RAB7B	Homo sapiens RAB7B, member RAS oncogene family (RAB7B), transcript variant 1, mRNA [NM_177403]	GO:0005802|GO:0032755|GO:0034144|GO:0005794|GO:0005770|GO:0007264|GO:0005525|GO:0015031|GO:0005764|GO:0045335|GO:0045654|GO:0051092|GO:0034499|GO:0030670|GO:0034164	NM_177403	Hs.534612	338382	22.4678	122.657	4.47091	6.63256	26.7981	22.7039	17.9013	43.6409	108.967	215.363	4.61692	4.603	4.1928	5.3546	6.59254	7.95054
A_33_P3414477	0.00125451	0.334228	4.37995	down	BC013681	chr15:74656817-74656876	LOC729739	Homo sapiens hypothetical LOC729739, mRNA (cDNA clone IMAGE:3881890), with apparent retained intron. [BC013681]				729739	67.347	301.107	6.04536	8.17628	52.46	79.1535	70.4276	296.052	382.412	224.857	5.58999	6.41867	6.12742	8.16163	8.35688	8.01033
A_23_P28485	0.0198598	0.553763	4.37621	down	NM_012198	chr2:163217169-163217228	GCA	Homo sapiens grancalcin, EF-hand calcium binding protein (GCA), mRNA [NM_012198]	GO:0005737|GO:0046982|GO:0005886|GO:0005509|GO:0061025|GO:0042803	NM_012198	Hs.377894	25801	94.7557	450.611	6.51399	8.64367	64.5573	107.951	111.759	215.442	591.387	545.003	5.89798	6.85319	6.7908	7.70616	8.97024	9.25461
A_23_P167159	0.0444961	0.620576	4.31618	down	NM_007281	chr4:174309518-174309459	SCRG1	Homo sapiens stimulator of chondrogenesis 1 (SCRG1), mRNA [NM_007281]	GO:0005615|GO:0007399	NM_007281	Hs.7122	11341	22.2675	121.954	4.39476	6.50452	21.9923	13.9238	30.8864	91.4135	238.033	36.4144	4.32883	3.89111	4.96435	6.45422	7.67161	5.38774
A_23_P33875	0.00201154	0.358224	4.30726	down	NM_001034832	chrX:48252375-48252434	SSX4B	Homo sapiens synovial sarcoma, X breakpoint 4B (SSX4B), transcript variant 1, mRNA [NM_001034832]	GO:0006355|GO:0005634|GO:0003676|GO:0006351	NM_001034832	Hs.648298	548313	7.59699	30.3914	2.80673	4.9135	10.9572	5	6.83379	32.9448	29.3086	28.9208	3.30405	2.33126	2.7849	4.90942	4.76513	5.06596
A_33_P3362321	0.0256419	0.575877	4.30606	down	NM_201555	chr2:105990080-105990021	FHL2	Homo sapiens four and a half LIM domains 2 (FHL2), transcript variant 2, mRNA [NM_201555]	GO:0005515|GO:0043066|GO:0030018|GO:0003713|GO:0005634|GO:0050681|GO:0044281|GO:0000122|GO:0015629|GO:0031430|GO:0001649|GO:0006351|GO:0042802|GO:0060347|GO:0055015|GO:0005654|GO:0008270|GO:0055014|GO:0009725|GO:0045893|GO:0005925|GO:0044255|GO:0030521|GO:0008134	NM_201555	Hs.443687	2274	28.0358	99.7578	4.51896	6.62533	54.2806	15.0491	14.7778	123.355	80.1145	95.8037	5.6361	4.00645	3.91433	6.90826	6.15392	6.8138
A_23_P368681	0.0181119	0.544273	4.22541	down	NM_015660	chr7:150389949-150390008	GIMAP2	Homo sapiens GTPase, IMAP family member 2 (GIMAP2), mRNA [NM_015660]	GO:0005811|GO:0016021|GO:0005525	NM_015660	Hs.647071	26157	14.7176	61.2914	3.72865	5.80774	12.8767	7.69525	23.5808	55.367	92.6232	35.8841	3.53965	3.05596	4.59034	5.7001	6.35679	5.36634
A_23_P121637	0.0111832	0.495657	4.16729	down	NM_003619	chr4:119203016-119202957	PRSS12	Homo sapiens protease, serine, 12 (neurotrypsin, motopsin) (PRSS12), mRNA [NM_003619]	GO:0030424|GO:0004252|GO:0005886|GO:0005576|GO:0043083|GO:0031410|GO:0006887|GO:0030425|GO:0043195|GO:0006508|GO:0008236|GO:0031638|GO:0005044	NM_003619	Hs.445857	8492	8.2722	36.3085	3.02725	5.08636	7.98865	8.83795	7.98998	21.9073	38.6312	48.3869	2.81976	3.25478	3.00723	4.285	5.15393	5.82016
A_24_P42136	0.00254608	0.36105	4.15349	down	NM_000224	chr12:53345577-53345636	KRT18	Homo sapiens keratin 18 (KRT18), transcript variant 1, mRNA [NM_000224]	GO:0005515|GO:0005882|GO:0048471|GO:0043066|GO:0005815|GO:0034451|GO:0005730|GO:0006915|GO:0009653|GO:0033209|GO:0005737|GO:0007049|GO:0005198|GO:0019048|GO:0097110|GO:0045095|GO:0043000	NM_000224	Hs.406013	3875	483.926	1996.26	8.82695	10.8813	443.447	385.909	622.421	1435.34	2250.64	2302.81	8.6203	8.63116	9.22938	10.4599	10.933	11.2509
A_23_P250164	0.0167653	0.538202	4.13531	down	NM_000187	chr3:120347262-120347203	HGD	Homo sapiens homogentisate 1,2-dioxygenase (HGD), mRNA [NM_000187]	GO:0034641|GO:0006559|GO:0004411|GO:0044281|GO:0006572|GO:0046872|GO:0005829	NM_000187	Hs.368254	3081	11.3934	48.1463	3.44168	5.48968	9.41329	8.59668	16.1703	28.6247	56.4898	59.3243	3.06247	3.21586	4.04673	4.695	5.66149	6.11255
A_23_P66241	0.0448825	0.621146	4.10495	down	NM_176870	chr16:56667810-56667869	MT1M	Homo sapiens metallothionein 1M (MT1M), mRNA [NM_176870]	GO:0071294|GO:0048471|GO:0005737|GO:0008270|GO:0005634|GO:0045926	NM_176870	Hs.647370	4499	10.3932	44.1472	3.2518	5.28916	16.8271	6.96634	7.38617	37.7156	20.7828	73.9431	3.94439	2.91005	2.90096	5.12673	4.31268	6.42809
A_33_P3242453	0.010383	0.484805	4.09507	down	NR_003948	chr6:31027543-31027602	HCG22	Homo sapiens HLA complex group 22 (non-protein coding) (HCG22), long non-coding RNA [NR_003948]	GO:0005576	NR_003948	Hs.207528	285834	73.4111	306.138	6.14113	8.17502	65.8905	54.9295	99.4133	245.704	246.122	426.587	5.9238	5.87843	6.62116	7.88475	7.71868	8.92163
A_23_P302550	0.040316	0.617048	4.07048	down	NM_130782	chr1:192154601-192154660	RGS18	Homo sapiens regulator of G-protein signaling 18 (RGS18), mRNA [NM_130782]	GO:0005737|GO:0007186|GO:0005886|GO:0038032|GO:0005096	NM_130782	Hs.440890	64407	24.6557	88.8362	4.33936	6.36456	15.3445	11.8183	46.8044	107.978	112.219	46.3116	3.80986	3.66157	5.54663	6.70982	6.62523	5.75862
A_33_P3255404	0.000347909	0.269389	4.06856	down	NM_005602	chr3:170151824-170151883	CLDN11	Homo sapiens claudin 11 (CLDN11), transcript variant 1, mRNA [NM_005602]	GO:0016338|GO:0005886|GO:0005198|GO:0016021|GO:0007283|GO:0005923|GO:0008366|GO:0042802	NM_005602	Hs.31595	5010	5	21.2038	2.32668	4.3512	5	5	5	28.3726	20.5574	14.6813	2.32271	2.33126	2.32609	4.68424	4.2981	4.07128
A_24_P247454	0.00313835	0.367592	4.0219	down		chr2:190176666-190176607							258.604	1037.79	7.93434	9.94222	249.891	195.702	330.22	729.601	1197.92	1185.84	7.80861	7.68141	8.313	9.47375	10.0244	10.3285
A_24_P256063	0.00158177	0.349948	4.01899	down		chr6:112683207-112683148							571.02	2287.01	9.07697	11.0838	527.057	468.833	717.171	1739.06	2603.18	2518.79	8.87909	8.90855	9.44329	10.7314	11.1444	11.3756
A_33_P3392391	0.013729	0.514782	4.01769	down	NM_001199752	chr19:50216029-50216088	CPT1C	Homo sapiens carnitine palmitoyltransferase 1C (CPT1C), transcript variant 3, mRNA [NM_001199752]	GO:0030054|GO:0006635|GO:0004095|GO:0032281|GO:0045202|GO:0005741	NM_001199752	Hs.112195	126129	8.55174	38.5512	3.07103	5.0774	8.17075	8.05713	9.42735	62.248	36.6882	16.7175	2.85632	3.11774	3.23903	5.88013	5.08107	4.27099
A_24_P401601	0.0024958	0.36105	4.00159	down		chr19:021145404-021145465							126.93	517.408	6.94385	8.94442	125.885	96.749	158.157	381.607	585.412	585.206	6.8469	6.70126	7.28339	8.52569	8.95536	9.35222
A_23_P368886	0.0161759	0.53738	3.97682	down	NM_175856	chr5:129521308-129521367	CHSY3	Homo sapiens chondroitin sulfate synthase 3 (CHSY3), mRNA [NM_175856]	GO:0030206|GO:0000139|GO:0005975|GO:0032580|GO:0044281|GO:0016021|GO:0030204|GO:0050510|GO:0047238|GO:0030203|GO:0046872	NM_175856	Hs.213137	337876	6.45329	30.4385	2.67023	4.66184	7.08751	5.51979	6.75259	18.202	55.499	17.6146	2.64389	2.59914	2.76766	4.00183	5.63268	4.35103
A_33_P3274642	0.0292191	0.587065	3.9527	down	AK027583	chr2:210847951-210848010	UNC80	Homo sapiens cDNA FLJ14677 fis, clone NT2RP2004095. [AK027583]	GO:0034220|GO:0005886|GO:0016021|GO:0055085		Hs.396201	285175	13.3264	49.5703	3.58421	5.56705	14.9509	18.8436	6.18472	33.5577	58.4864	56.6666	3.77089	4.33725	2.6445	4.94082	5.70774	6.05259
A_24_P169843	0.00192836	0.354683	3.94013	down		chr1:182929155-182929094							408.098	1596.3	8.5887	10.5669	406.986	306.844	510.463	1178.27	1947.33	1663.28	8.49379	8.31635	8.95595	10.1789	10.7183	10.8036
A_33_P3240295	0.00224222	0.358662	3.90982	down		chr2:074534419-074534360							294.514	1143.52	8.12062	10.0877	283.736	225.265	374.542	850.791	1326.88	1252.89	7.98196	7.88108	8.49882	9.69728	10.1579	10.408
A_23_P373708	0.00274945	0.364951	3.90854	down	NR_028334	chr17:26603822-26603763	KRT18P55	Homo sapiens keratin 18 pseudogene 55 (KRT18P55), non-coding RNA [NR_028334]		NR_028334	Hs.371796	284085	612.567	2370.83	9.16838	11.135	564.329	477.064	796.308	1754.18	2673.97	2684.34	8.98267	8.93018	9.5923	10.7475	11.19	11.4676
A_33_P3333054	0.00889611	0.470481	3.87281	down	NM_001099744	chr8:110587252-110587193	SYBU	Homo sapiens syntabulin (syntaxin-interacting) (SYBU), transcript variant 1, mRNA [NM_001099744]	GO:0005515|GO:0000139|GO:0016023|GO:0019894|GO:0017075|GO:0016021|GO:0005856	NM_001099744	Hs.390738	55638	14.9678	63.0296	3.89046	5.84384	16.208	16.0795	12.6159	37.1119	97.3871	54.5896	3.89189	4.10084	3.67864	5.10164	6.43222	5.99765
A_24_P358131	0.00152024	0.349948	3.86707	down		chr2:032048352-032048291							200.85	788.063	7.60724	9.55848	197.621	181.674	223.256	578.598	882.821	902.77	7.48033	7.57638	7.76501	9.13227	9.58518	9.95798
A_24_P238131	0.0108814	0.491655	3.86181	down	NM_015551	chr3:33192175-33192116	SUSD5	Homo sapiens sushi domain containing 5 (SUSD5), mRNA [NM_015551]	GO:0005540|GO:0016021|GO:0007155	NM_015551	Hs.196647	26032	76.9168	294.704	6.14083	8.09011	117.48	43.7751	69.4955	333.252	388.81	162.05	6.7485	5.56496	6.10904	8.33711	8.37647	7.55676
A_33_P3408918	2.59051e-05	0.0782283	3.85822	down	NM_030754	chr11:18266850-18266791	SAA2	Homo sapiens serum amyloid A2 (SAA2), transcript variant 1, mRNA [NM_030754]	GO:0034364|GO:0006953	NM_030754	Hs.731376	6289	5	19.5426	2.32668	4.27462	5	5	5	19.3648	21.2369	18.026	2.32271	2.33126	2.32609	4.09838	4.34031	4.38517
A_24_P230057	0.0036245	0.377589	3.84534	down		chrX:106672353-106672412							207.819	800.109	7.63572	9.57883	184.125	176.468	262.863	595.975	834.751	969.599	7.37714	7.53527	7.99475	9.17841	9.49639	10.0617
A_33_P3372332	0.0373927	0.608824	3.83766	down	NM_000101	chr16:88713223-88713164	CYBA	Homo sapiens cytochrome b-245, alpha polypeptide (CYBA), mRNA [NM_000101]	GO:0045730|GO:0005515|GO:0002474|GO:0017124|GO:0030307|GO:0006801|GO:0071480|GO:0050665|GO:0046872|GO:0030425|GO:0005739|GO:0016324|GO:0006954|GO:0071230|GO:0016175|GO:0071356|GO:0043025|GO:0030670|GO:0031667|GO:0071333|GO:0030141|GO:0090382|GO:0070555|GO:0042554|GO:0005794|GO:0051701|GO:0046982|GO:0042493|GO:0042590|GO:0009055|GO:0014895|GO:0003106|GO:0071407|GO:0001938|GO:0045087|GO:0002479|GO:…	NM_000101	Hs.513803	1535	14.9446	69.0813	3.86599	5.80621	18.9123	14.1564	11.7651	85.1415	101.409	20.694	4.11089	3.91497	3.5721	6.34744	6.48761	4.58359
A_23_P156970	0.00348189	0.377589	3.81421	down	NM_002402	chr7:130145648-130145707	MEST	Homo sapiens mesoderm specific transcript (MEST), transcript variant 1, mRNA [NM_002402]	GO:0016787|GO:0005783|GO:0005789|GO:0007498|GO:0032526|GO:0016021|GO:0010883	NM_002402	Hs.270978	4232	404.455	1561.97	8.58045	10.5118	403.705	473.325	336.335	1045.47	1979.01	1661.42	8.48264	8.92001	8.33869	9.99501	10.739	10.8015
A_33_P3284359	0.000202696	0.21107	3.77757	down	AW291512	chrX:30323850-30323791	NR0B1	nuclear receptor subfamily 0, group B, member 1 [Source:HGNC Symbol;Acc:7960] [ENST00000378963]	GO:0005515|GO:0008406|GO:0010467|GO:0006694|GO:0006367|GO:0030325|GO:0003723|GO:0021983|GO:0035258|GO:0033144|GO:0003707|GO:0050682|GO:0005634|GO:0007283|GO:0043433|GO:0042803|GO:0060008|GO:0005737|GO:0008104|GO:0042788|GO:0030238|GO:0004879|GO:0003714|GO:0019904|GO:0006950|GO:0032448|GO:0000122|GO:0021854|GO:0003677|GO:0043565|GO:0016020|GO:0033327|GO:0005654|GO:0045596|GO:0045892|GO:0030522|GO:…		Hs.609452	190	149.509	574.859	7.1995	9.11696	145.315	143.638	159.575	494.113	651.841	578.624	7.04938	7.25197	7.29714	8.90062	9.11173	9.33853
A_23_P121898	0.0358837	0.602968	3.76685	down	NM_024615	chr5:50129844-50130785	PARP8	Homo sapiens poly (ADP-ribose) polymerase family, member 8 (PARP8), transcript variant 2, mRNA [NM_024615]	GO:0005622|GO:0003950	NM_024615	Hs.369581	79668	5.98626	27.7448	2.60122	4.51458	5.18182	5.11851	7.65844	49.2795	24.0206	9.93436	2.35071	2.50121	2.95175	5.53755	4.50619	3.5
A_33_P3386723	0.00551182	0.410406	3.7306	down		chr6:085998178-085998237							246.94	938.688	7.87733	9.77674	231.57	202.322	306.93	596.886	1134.2	1084.97	7.70013	7.72163	8.21024	9.18289	9.94387	10.2035
A_23_P91943	0.00615272	0.424013	3.72917	down	NM_000882	chr3:159713231-159713290	IL12A	Homo sapiens interleukin 12A (natural killer cell stimulatory factor 1, cytotoxic lymphocyte maturation factor 1, p35) (IL12A), mRNA [NM_000882]	GO:0005515|GO:0050830|GO:0042520|GO:0005615|GO:0032816|GO:0045513|GO:0006955|GO:0005737|GO:0042102|GO:0051135|GO:0032496|GO:0007050|GO:0045582|GO:0032729|GO:0046982|GO:0005143|GO:0042163|GO:0050671|GO:0042832|GO:0048662|GO:0097191|GO:0009615|GO:0005125|GO:0045785|GO:0032700|GO:0016477|GO:0010224|GO:0043514|GO:0001916|GO:0045954|GO:0034393|GO:0002860|GO:0008083	NM_000882	Hs.673	3592	6.27015	25.6425	2.63192	4.53078	7.41885	6.26069	5.13091	26.3343	37.3652	13.2279	2.70583	2.76097	2.42897	4.56722	5.10817	3.91696
A_23_P18684	0.0472658	0.626281	3.708	down	NM_004362	chr4:141310434-141310375	CLGN	Homo sapiens calmegin (CLGN), transcript variant 1, mRNA [NM_004362]	GO:0007338|GO:0006461|GO:0006457|GO:0005783|GO:0005509|GO:0005789|GO:0051082|GO:0016021|GO:0005635|GO:0007339	NM_004362	Hs.86368	1047	64.4643	196.476	5.70753	7.59817	70.6212	20.1007	102.671	187.677	217.758	183.994	6.01973	4.43322	6.66964	7.51882	7.54206	7.73364
A_23_P97141	0.0126752	0.504179	3.70064	down	NM_002922	chr1:192548857-192548916	RGS1	Homo sapiens regulator of G-protein signaling 1 (RGS1), mRNA [NM_002922]	GO:0043547|GO:0007165|GO:0005516|GO:0006955|GO:0005737|GO:0005886|GO:0038032|GO:0007193|GO:0005096	NM_002922	Hs.75256	5996	8.16871	28.3731	2.91951	4.80729	7.86459	11.6415	5	35.7524	21.9099	27.4568	2.79392	3.63853	2.32609	5.04573	4.38162	4.99451
A_23_P38959	0.0189661	0.547498	3.6901	down	NM_005428	chr19:6853995-6854054	VAV1	Homo sapiens vav 1 guanine nucleotide exchange factor (VAV1), transcript variant 1, mRNA [NM_005428]	GO:0005515|GO:0003700|GO:0005886|GO:0007264|GO:0035023|GO:0031295|GO:0046872|GO:0005829|GO:0005085|GO:0005543|GO:0007173|GO:0030676|GO:0051056|GO:0006355|GO:0048011|GO:0043065|GO:0048015|GO:0030168|GO:0097190|GO:0043087|GO:0045785|GO:0042110|GO:0008543|GO:0007596|GO:0007229|GO:0045087|GO:0038096|GO:0038095	NM_005428	Hs.116237	7409	44.0367	154.087	5.33817	7.22183	23.8362	44.1619	64.112	122.056	197.21	142.996	4.43872	5.57532	6.00047	6.89182	7.40368	7.37
A_33_P3381948	0.0379725	0.608824	3.66872	down	NM_001080436	chr19:34991985-34992044	WTIP	Homo sapiens Wilms tumor 1 interacting protein (WTIP), mRNA [NM_001080436]	GO:0005515|GO:0001666|GO:0006355|GO:2000637|GO:0005634|GO:0006351|GO:0035331|GO:0005912|GO:0000932|GO:0035195|GO:0007010|GO:0022604|GO:0008270	NM_001080436	Hs.585010	126374	377.562	1577.09	8.48587	10.3611	378.255	439.968	314.464	710.653	1355.14	2665.46	8.39478	8.81382	8.24902	9.43359	10.1911	11.4588
A_23_P46781	0.00166592	0.349948	3.6667	down	NM_003638	chr10:15561364-15561305	ITGA8	Homo sapiens integrin, alpha 8 (ITGA8), mRNA [NM_003638]	GO:0001656|GO:0008305|GO:0042472|GO:0005886|GO:2000721|GO:0045177|GO:0034678|GO:0046872|GO:0045184|GO:0007399|GO:0016337|GO:0007160|GO:0007229|GO:0030198|GO:0048745|GO:0030030|GO:0007613|GO:0030511	NM_003638	Hs.171311	8516	5	19.6495	2.32668	4.20117	5	5	5	22.8721	24.593	11.4833	2.32271	2.33126	2.32609	4.35435	4.53483	3.71432
A_23_P73632	0.0128386	0.504202	3.66599	down	NM_000475	chrX:30322698-30322639	NR0B1	Homo sapiens nuclear receptor subfamily 0, group B, member 1 (NR0B1), mRNA [NM_000475]	GO:0005515|GO:0008406|GO:0010467|GO:0006694|GO:0006367|GO:0030325|GO:0003723|GO:0021983|GO:0035258|GO:0033144|GO:0003707|GO:0050682|GO:0005634|GO:0007283|GO:0043433|GO:0042803|GO:0060008|GO:0005737|GO:0008104|GO:0042788|GO:0030238|GO:0004879|GO:0003714|GO:0019904|GO:0006950|GO:0032448|GO:0000122|GO:0021854|GO:0003677|GO:0043565|GO:0016020|GO:0033327|GO:0005654|GO:0045596|GO:0045892|GO:0030522|GO:…	NM_000475	Hs.268490	190	4467.08	16552	12.0229	13.8971	3787.58	3430.17	6183.48	10133.2	17655.5	21867.1	11.7458	11.7123	12.6108	13.338	13.8919	14.4615
A_23_P203957	0.00769343	0.447429	3.66449	down	NM_175861	chr12:29659276-29659217	TMTC1	Homo sapiens transmembrane and tetratricopeptide repeat containing 1 (TMTC1), transcript variant 2, mRNA [NM_175861]	GO:0005739|GO:0016021	NM_175861	Hs.401954	83857	5	19.1739	2.32668	4.2003	5	5	5	14.7555	16.4469	26.3194	2.32271	2.33126	2.32609	3.66978	4.00019	4.93093
A_23_P203475	0.00994848	0.481449	3.65995	down	NM_145040	chr11:6340269-6340210	PRKCDBP	Homo sapiens protein kinase C, delta binding protein (PRKCDBP), mRNA [NM_145040]	GO:0005515|GO:0005080	NM_145040	Hs.434044	112464	83.5454	345.055	6.37099	8.24281	75.9639	87.8084	86.8637	332.526	542.773	159.866	6.11837	6.56835	6.42624	8.33291	8.85759	7.53791
A_23_P500464	0.00716916	0.440629	3.63046	down	NM_001844	chr12:48367008-48366949	COL2A1	Homo sapiens collagen, type II, alpha 1 (COL2A1), transcript variant 1, mRNA [NM_001844]	GO:0071773|GO:0010468|GO:0051216|GO:0007605|GO:0005615|GO:0046872|GO:0005585|GO:0042802|GO:0001894|GO:0022617|GO:0030020|GO:0007411|GO:0002062|GO:0030198|GO:0060351|GO:0030199|GO:0030574|GO:0060021|GO:0043066|GO:0042472|GO:0071599|GO:0048407|GO:0005576|GO:0006029|GO:0007417|GO:0005604|GO:0003007|GO:0001958|GO:0001501|GO:0001502|GO:0060272|GO:0060174|GO:0005788|GO:0030903|GO:0007601	NM_001844	Hs.408182	1280	9.02551	36.1435	3.14813	5.00828	9.12691	7.93088	10.0187	33.9836	55.9458	18.5011	3.01657	3.09643	3.33139	4.95828	5.6468	4.41976
A_32_P157945	0.0240895	0.567279	3.62255	down	NM_004415	chr6:7586582-7586641	DSP	Homo sapiens desmoplakin (DSP), transcript variant 1, mRNA [NM_004415]	GO:0005882|GO:0005515|GO:0030057|GO:0045109|GO:0005886|GO:0086091|GO:0006921|GO:0001533|GO:0005739|GO:0016323|GO:0016337|GO:0086069|GO:0003223|GO:0014704|GO:0097110|GO:0005080|GO:0030674|GO:0086005|GO:0006915|GO:0002934|GO:0018149|GO:0008544|GO:0005198|GO:0030216|GO:0071896|GO:0005200|GO:0034332	NM_004415	Hs.519873	1832	13.0584	45.1884	3.57876	5.43576	20.6629	7.76578	10.7465	38.6321	33.058	63.8751	4.23353	3.06577	3.43697	5.16172	4.92868	6.21689
A_33_P3252781	0.0287444	0.586256	3.59291	down	NM_001012973	chr10:81901875-81901934	PLAC9	Homo sapiens placenta-specific 9 (PLAC9), mRNA [NM_001012973]	GO:0005576	NM_001012973	Hs.204947	219348	6.50967	25.9451	2.63754	4.48269	5	5	9.529	26.8782	40.0735	10.8835	2.32271	2.33126	3.25866	4.60082	5.20713	3.64013
A_32_P151544	0.00501137	0.409392	3.56597	down	NM_000224	chr12:53346116-53346554	KRT18	Homo sapiens keratin 18 (KRT18), transcript variant 1, mRNA [NM_000224]	GO:0005515|GO:0005882|GO:0048471|GO:0043066|GO:0005815|GO:0034451|GO:0005730|GO:0006915|GO:0009653|GO:0033209|GO:0005737|GO:0007049|GO:0005198|GO:0019048|GO:0097110|GO:0045095|GO:0043000	NM_000224	Hs.406013	3875	4230.18	15161.3	11.9614	13.7957	3557.72	3635.45	5497.38	10992.4	15674.7	18816.9	11.6521	11.7997	12.4323	13.444	13.7306	14.2124
A_24_P766716	0.0226624	0.565244	3.49537	down	NM_001142343	chr12:108681943-108681884	CMKLR1	Homo sapiens chemokine-like receptor 1 (CMKLR1), transcript variant 1, mRNA [NM_001142343]	GO:0050848|GO:0005515|GO:0070098|GO:0005886|GO:0004930|GO:0032088|GO:0001501|GO:0006955|GO:0006935|GO:0007186|GO:0032695|GO:0005887|GO:0045600|GO:0004950|GO:0010759|GO:0004872|GO:0016021	NM_001142343	Hs.197143	1240	20.8147	65.4151	4.20394	6.00938	21.1496	9.29165	32.0028	78.7471	67.446	50.0522	4.26987	3.32888	5.01306	6.23931	5.91765	5.87119
A_23_P204885	0.00639057	0.424013	3.4855	down	NM_022843	chr13:61984425-61984366	PCDH20	Homo sapiens protocadherin 20 (PCDH20), mRNA [NM_022843]	GO:0005886|GO:0005509|GO:0016021|GO:0007156	NM_022843	Hs.391781	64881	5.3359	19.8576	2.45059	4.25196	5	6.0077	5	14.2674	23.5855	21.7199	2.32271	2.70298	2.32609	3.61852	4.48263	4.65472
A_33_P3276100	0.00346282	0.377589	3.44462	down	NR_027336	chr16:90109899-90109840	URAHP	Homo sapiens urate (hydroxyiso-) hydrolase, pseudogene (URAHP), transcript variant 1, non-coding RNA [NR_027336]		NR_027336	Hs.431792	100130015	6.61923	21.7838	2.64391	4.42826	5.61165	5	9.24603	22.2804	23.2589	19.8119	2.39313	2.33126	3.20735	4.31479	4.46056	4.50943
A_23_P41114	0.00480578	0.408689	3.43413	down	NM_005213	chr3:122056416-122056475	CSTA	Homo sapiens cystatin A (stefin A) (CSTA), mRNA [NM_005213]	GO:0016337|GO:0005737|GO:0018149|GO:0004869|GO:0030216|GO:0005198|GO:0010466|GO:0005634|GO:0030674|GO:0002020|GO:0001533	NM_005213	Hs.518198	1475	26.3365	92.2711	4.70329	6.48323	24.0555	24.4967	30.4572	64.7455	111.23	100.838	4.4539	4.71181	4.94414	5.9453	6.61214	6.89225
A_33_P3214690	0.00297454	0.36726	3.42225	down	NM_014932	chr3:173998992-173999051	NLGN1	Homo sapiens neuroligin 1 (NLGN1), mRNA [NM_014932]	GO:0030054|GO:0017146|GO:2000311|GO:0045202|GO:0051491|GO:2000310|GO:0006605|GO:0016339|GO:1900029|GO:0045211|GO:0046983|GO:0051260|GO:0050839|GO:0060999|GO:0097091|GO:0048789|GO:0051965|GO:0010740|GO:0009986|GO:2000463|GO:0051968|GO:0007416|GO:0032230|GO:0005887|GO:0009897|GO:0023041|GO:0016080|GO:0035418|GO:0097120|GO:0051290|GO:1900244|GO:0032433|GO:0030425|GO:0045184|GO:0002087|GO:0097115|GO:…	NM_014932	Hs.478289	22871	5.82884	20.025	2.53259	4.30753	5.88066	6.60586	5	19.3585	17.2943	23.4224	2.43018	2.84148	2.32609	4.09803	4.06585	4.75871
A_23_P321034	0.000835756	0.300454	3.40805	down	NM_176877	chr1:62628634-62628693	INADL	Homo sapiens InaD-like (Drosophila) (INADL), mRNA [NM_176877]	GO:0035556|GO:0005515|GO:0048471|GO:0016324|GO:0070830|GO:0005886|GO:0034329|GO:0005923|GO:0045216	NM_176877	Hs.478125	10207	6.67305	22.2819	2.68983	4.45878	8.01113	7.00803	5	26.7009	21.5919	18.5529	2.82332	2.92009	2.32609	4.58979	4.36376	4.42279
A_33_P3420633	0.0272291	0.579398	3.39894	down	NM_145270	chr16:615469-615528	C16orf11	Homo sapiens chromosome 16 open reading frame 11 (C16orf11), mRNA [NM_145270]		NM_145270	Hs.632220	146325	7.21639	26.6941	2.82948	4.59456	7.39354	7.31109	6.94453	14.4578	29.1596	36.465	2.70045	2.98026	2.80773	3.63707	4.75693	5.38969
A_23_P363316	0.00787997	0.450343	3.37057	down	NM_002147	chr17:46668865-46668806	HOXB5	Homo sapiens homeobox B5 (HOXB5), mRNA [NM_002147]	GO:0043565|GO:0003700|GO:0048704|GO:0005634|GO:0045446|GO:0009952|GO:0009653|GO:0006351	NM_002147	Hs.654456	3215	24.325	79.458	4.52326	6.27625	30.6078	28.2928	14.0743	87.6642	92.3551	58.3547	4.81246	4.91742	3.83989	6.38717	6.35222	6.08936
A_33_P3304372	0.00541997	0.410406	3.32723	down	NM_018342	chr4:159176254-159176313	TMEM144	Homo sapiens transmembrane protein 144 (TMEM144), mRNA [NM_018342]	GO:0016021	NM_018342	Hs.176227	55314	22.5237	74.5663	4.46497	6.19929	26.3249	24.5517	16.6944	60.9647	73.9673	88.7669	4.58887	4.71339	4.09265	5.85033	6.05444	6.6931
A_23_P13822	0.0338587	0.599317	3.32664	down	NM_018423	chr12:10771913-10771854	STYK1	Homo sapiens serine/threonine/tyrosine kinase 1 (STYK1), mRNA [NM_018423]	GO:0005515|GO:0005886|GO:0016021|GO:0005524|GO:0004715	NM_018423	Hs.24979	55359	5	18.3692	2.32668	4.06075	5	5	5	10.2733	16.7451	28.0892	2.32271	2.33126	2.32609	3.13314	4.0222	5.02691
A_23_P148609	0.0017165	0.349948	3.32232	down	NM_021796	chrX:133700139-133700080	PLAC1	Homo sapiens placenta-specific 1 (PLAC1), mRNA [NM_021796]	GO:0003674|GO:0090214|GO:0005576|GO:0005575|GO:0001890	NM_021796	Hs.496811	10761	9.93206	34.1754	3.28267	5.01486	12.0853	9.55386	8.15703	32.5442	46.6067	23.3753	3.44552	3.36742	3.03507	4.89219	5.39638	4.75602
A_23_P330561	0.0339335	0.599317	3.31488	down	NM_174918	chr19:7744452-7744511	C19orf59	Homo sapiens chromosome 19 open reading frame 59 (C19orf59), mRNA [NM_174918]	GO:0016021	NM_174918	Hs.709539	199675	203.362	712.942	7.5765	9.30546	189.661	140.016	280.409	335.587	980.597	822.64	7.42288	7.22112	8.08551	8.34833	9.73749	9.83056
A_33_P3284763	0.00108106	0.314615	3.31096	down	NM_004021	chrX:31152279-31152220	DMD	Homo sapiens dystrophin (DMD), transcript variant Dp140b, mRNA [NM_004021]	GO:0005515|GO:0030018|GO:0030055|GO:0002162|GO:2000651|GO:0060857|GO:0060048|GO:0043623|GO:0048747|GO:0021629|GO:0044458|GO:0016010|GO:0030198|GO:0045211|GO:0016013|GO:0086001|GO:0008307|GO:0005856|GO:0051647|GO:0009986|GO:0005509|GO:0043043|GO:0045213|GO:0014904|GO:0014809|GO:0043234|GO:0007517|GO:0002027|GO:0007519|GO:0010976|GO:0017166|GO:0043034|GO:0008270|GO:0017022|GO:0045121|GO:0001954|GO:…	NM_004021	Hs.495912	1756	29.0299	98.5238	4.84494	6.57219	33.0332	24.7754	29.2811	77.0181	133.229	85.3247	4.92207	4.72506	4.88767	6.20695	6.87575	6.63386
A_23_P125383	0.023432	0.565244	3.30977	down	NM_016192	chr2:192815005-192814946	TMEFF2	Homo sapiens transmembrane protein with EGF-like and two follistatin-like domains 2 (TMEFF2), mRNA [NM_016192]	GO:0003674|GO:0005576|GO:0016021	NM_016192	Hs.144513	23671	81.8568	270.256	6.28512	8.01185	53.074	106.273	86.2232	194.541	266.101	350.125	5.60644	6.83084	6.41808	7.56571	7.82802	8.64182
A_23_P362759	0.00371868	0.377589	3.29285	down	NM_018699	chr4:121616308-121616249	PRDM5	Homo sapiens PR domain containing 5 (PRDM5), mRNA [NM_018699]	GO:0005515|GO:0000976|GO:0016575|GO:0044212|GO:0008168|GO:0005634|GO:0006351|GO:0046872|GO:0043565|GO:0070491|GO:0000278|GO:0045892|GO:0051567	NM_018699	Hs.666782	11107	5	17.3741	2.32668	4.04602	5	5	5	13.0601	22.9771	16.0851	2.32271	2.33126	2.32609	3.49568	4.43715	4.20523
A_24_P929388	0.00962588	0.479468	3.29126	down	NM_138390	chr2:216966690-216966749	TMEM169	Homo sapiens transmembrane protein 169 (TMEM169), transcript variant 3, mRNA [NM_138390]	GO:0016021	NM_138390	Hs.334916	92691	11.97	39.6745	3.50509	5.22373	13.6109	7.06936	15.2297	36.7664	55.6999	26.5572	3.62811	2.93121	3.95594	5.08654	5.64011	4.94453
A_23_P46429	0.0101119	0.483318	3.29071	down	NM_001554	chr1:86048953-86049012	CYR61	Homo sapiens cysteine-rich, angiogenic inducer, 61 (CYR61), mRNA [NM_001554]	GO:0044319|GO:0060710|GO:0060591|GO:0008283|GO:0003181|GO:0010811|GO:0003281|GO:0002041|GO:0001558|GO:0009653|GO:0030513|GO:0006935|GO:0030198|GO:0045944|GO:0045860|GO:0060716|GO:0033690|GO:0070372|GO:0008201|GO:0005520|GO:0003278|GO:0043066|GO:2000304|GO:0030335|GO:0043065|GO:0060413|GO:0072593|GO:0050840|GO:0010518|GO:0005576|GO:0001649|GO:0043280|GO:0045669|GO:0005178|GO:0061036|GO:0001934	NM_001554	Hs.8867	3491	952.204	3260.48	9.8225	11.5409	1044.04	1004.09	808.476	1869.76	3862.72	4048.98	9.87198	9.98209	9.61343	10.8509	11.7195	12.0523
A_23_P502336	0.0465622	0.624927	3.23336	down	NM_013447	chr19:14843917-14843858	EMR2	Homo sapiens egf-like module containing, mucin-like, hormone receptor-like 2 (EMR2), transcript variant 1, mRNA [NM_013447]	GO:0031256|GO:0005886|GO:0004930|GO:0005509|GO:0071621|GO:0032587|GO:0035374|GO:0006954|GO:0007186|GO:0016477|GO:0007218|GO:0016021|GO:0007155	NM_013447	Hs.531619	30817	18.6042	56.9995	4.06701	5.76004	11.921	30.7123	13.1794	36.8591	73.5184	60.6211	3.42633	5.03193	3.74276	5.09129	6.04395	6.14489
A_32_P36694	0.0472486	0.626281	3.22854	down	NM_175061	chr7:27870436-27870377	JAZF1	Homo sapiens JAZF zinc finger 1 (JAZF1), mRNA [NM_175061]	GO:0017053|GO:0003714|GO:0000122|GO:0003676|GO:0046872|GO:0006351	NM_175061	Hs.368944	221895	6.00925	22.2671	2.49452	4.1854	8.02774	5	5	25.481	34.0108	7.3095	2.82621	2.33126	2.32609	4.51737	4.97035	3.06848
A_32_P126375	0.0433532	0.619509	3.211	down	NM_198270	chrX:17753480-17753539	NHS	Homo sapiens Nance-Horan syndrome (congenital cataracts and dental anomalies) (NHS), transcript variant 1, mRNA [NM_198270]	GO:0016324|GO:0005737|GO:0002088|GO:0005923|GO:0005925|GO:0030154|GO:0030027	NM_198270	Hs.201623	4810	8.88795	32.5292	3.09682	4.77984	11.1172	6.01648	9.5302	51.1922	34.6117	11.7836	3.32605	2.70545	3.25894	5.59205	4.99631	3.75116
A_24_P120251	0.0375887	0.608824	3.20444	down	NM_138786	chr3:149040112-149040053	TM4SF18	Homo sapiens transmembrane 4 L six family member 18 (TM4SF18), transcript variant 1, mRNA [NM_138786]	GO:0016021	NM_138786	Hs.22026	116441	8.36401	28.7107	3.01471	4.69479	10.3631	8.93165	5.79726	15.054	37.6696	33.4086	3.21173	3.2726	2.55982	3.70029	5.11903	5.26505
A_23_P35725	0.0171431	0.538202	3.19726	down	NM_031418	chr11:26684671-26684730	ANO3	Homo sapiens anoctamin 3 (ANO3), mRNA [NM_031418]	GO:0034220|GO:0005886|GO:0005229|GO:0016021|GO:0055085	NM_031418	Hs.91791	63982	5	18.2032	2.32668	4.00352	5	5	5	31.197	14.2236	9.18897	2.32271	2.33126	2.32609	4.82139	3.80727	3.38191
A_24_P334300	0.0102195	0.484471	3.14753	down	NM_004113	chr3:191860574-191860515	FGF12	Homo sapiens fibroblast growth factor 12 (FGF12), transcript variant 2, mRNA [NM_004113]	GO:0008344|GO:0007254|GO:0007267|GO:0007268|GO:0005104|GO:0005634|GO:2000649|GO:2001258|GO:0005615|GO:0044325|GO:0007399|GO:0050905|GO:0007507|GO:0007165|GO:0010765|GO:0008543|GO:0086002|GO:0008083|GO:0008201|GO:0017080	NM_004113	Hs.390250	2257	5	17.2465	2.32668	3.98091	5	5	5	28.3242	11.3363	12.079	2.32271	2.33126	2.32609	4.68186	3.47666	3.7842
A_23_P211345	0.0468025	0.626281	3.14333	down	NM_080647	chr22:19754788-19754847	TBX1	Homo sapiens T-box 1 (TBX1), transcript variant C, mRNA [NM_080647]	GO:0007389|GO:0003700|GO:0071300|GO:0007605|GO:0001755|GO:0048844|GO:0048538|GO:0048752|GO:0048703|GO:0030878|GO:0048701|GO:0042803|GO:0042693|GO:0007507|GO:0048644|GO:0046983|GO:0001945|GO:0050679|GO:0042471|GO:0042472|GO:0001708|GO:0021644|GO:0060037|GO:0048384|GO:0007517|GO:0035176|GO:0045596|GO:0045893|GO:0043587|GO:2001054|GO:0008284|GO:0007368|GO:0008283|GO:2000027|GO:0048514|GO:0005634|GO:…	NM_080647	Hs.173984	6899	325.366	1009.29	8.19664	9.84894	181.471	434.826	359.801	573.523	1179.93	1274.4	7.35448	8.79812	8.43732	9.11588	9.99872	10.4322
A_33_P3391915	0.0390591	0.61381	3.14026	down	NM_001080466	chr17:72352614-72352555	BTBD17	Homo sapiens BTB (POZ) domain containing 17 (BTBD17), mRNA [NM_001080466]	GO:0005737|GO:0005886|GO:0005576|GO:0009615|GO:0045071	NM_001080466	Hs.211870	388419	240.927	760.009	7.74675	9.39763	212.624	132.348	377.811	466.303	1256.42	557.306	7.58091	7.14874	8.5106	8.81939	10.0865	9.287
A_24_P85557	0.00437342	0.391895	3.13199	down	NM_005302	chr7:124386270-124386211	GPR37	Homo sapiens G protein-coupled receptor 37 (endothelin receptor type B-like) (GPR37), mRNA [NM_005302]	GO:0007186|GO:0005887|GO:0004930|GO:0005789	NM_005302	Hs.731392	2861	7.11812	22.3704	2.76768	4.41476	9.19421	7.16016	5	21.4574	29.3782	16.2755	3.02738	2.94957	2.32609	4.25042	4.76762	4.22625
A_24_P84970	0.00408741	0.388149	3.12968	down		chr5:108924995-108925054							149.766	484.928	7.20078	8.8468	153.634	133.816	161.848	342.042	546.066	566.677	7.12144	7.16363	7.31727	8.36817	8.86299	9.30922
A_23_P57709	0.00171146	0.349948	3.11226	down	NM_013363	chr3:142536972-142536913	PCOLCE2	Homo sapiens procollagen C-endopeptidase enhancer 2 (PCOLCE2), mRNA [NM_013363]	GO:0016504|GO:0010952|GO:0005518|GO:0005576|GO:0008201	NM_013363	Hs.8944	26577	234.074	734.39	7.81145	9.44941	257.379	182.497	262.346	837.403	882.342	483.425	7.85847	7.58309	7.99279	9.67718	9.58348	9.08758
A_23_P392384	0.00723004	0.440629	3.11043	down	NM_001185095	chr9:133998333-133998392	AIF1L	Homo sapiens allograft inflammatory factor 1-like (AIF1L), transcript variant 3, mRNA [NM_001185095]	GO:0005737|GO:0051015|GO:0005884|GO:0005509|GO:0032587|GO:0015629|GO:0005925	NM_001185095	Hs.4944	83543	22.3758	68.2121	4.41922	6.05633	18.9991	16.5593	31.569	58.1694	85.8521	60.6147	4.11743	4.14047	4.99975	5.77447	6.24993	6.1446
A_23_P167389	0.0053921	0.410406	3.10662	down	NM_022481	chr5:141033208-141033149	ARAP3	Homo sapiens ArfGAP with RhoGAP domain, ankyrin repeat and PH domain 3 (ARAP3), mRNA [NM_022481]	GO:0005515|GO:0051056|GO:0030336|GO:0035021|GO:0005886|GO:0007264|GO:0043325|GO:0035024|GO:0008360|GO:0005547|GO:0001726|GO:0030027|GO:0005100|GO:0005829|GO:0008060|GO:0005737|GO:0032312|GO:0007010|GO:0008270|GO:0016192|GO:0005856|GO:0030675	NM_022481	Hs.726187	64411	22.9741	72.0942	4.50838	6.14373	24.636	25.0193	19.2669	57.9082	71.2483	87.126	4.48831	4.739	4.29784	5.76729	5.99765	6.66624
A_33_P3262181	0.000499398	0.279219	3.10007	down	NM_001006666	chr22:39440368-39440427	APOBEC3F	Homo sapiens apolipoprotein B mRNA editing enzyme, catalytic polypeptide-like 3F (APOBEC3F), transcript variant 2, mRNA [NM_001006666]	GO:0005515|GO:0030895|GO:0009972|GO:0003723|GO:0016553|GO:0045869|GO:0048525|GO:0010529|GO:0051607|GO:0005737|GO:0000932|GO:0045087|GO:0002230|GO:0030529|GO:0080111|GO:0004126|GO:0008270|GO:0070383|GO:0045071	NM_001006666	Hs.659809	200316	8.35501	26.5985	3.03944	4.67174	9.1641	7.67797	8.22296	26.1607	34.2962	19.3387	3.02272	3.05039	3.04521	4.55431	4.98471	4.4762
A_23_P18123	0.0108002	0.49118	3.09294	down	NM_014932	chr3:174000648-174000707	NLGN1	Homo sapiens neuroligin 1 (NLGN1), mRNA [NM_014932]	GO:0030054|GO:0017146|GO:2000311|GO:0045202|GO:0051491|GO:2000310|GO:0006605|GO:0016339|GO:1900029|GO:0045211|GO:0046983|GO:0051260|GO:0050839|GO:0060999|GO:0097091|GO:0048789|GO:0051965|GO:0010740|GO:0009986|GO:2000463|GO:0051968|GO:0007416|GO:0032230|GO:0005887|GO:0009897|GO:0023041|GO:0016080|GO:0035418|GO:0097120|GO:0051290|GO:1900244|GO:0032433|GO:0030425|GO:0045184|GO:0002087|GO:0097115|GO:…	NM_014932	Hs.478289	22871	6.65705	19.9485	2.64387	4.27285	8.8539	5	6.11726	24.6988	12.8965	22.2503	2.97033	2.33126	2.63003	4.46782	3.66361	4.68712
A_24_P250765	0.046683	0.625714	3.08598	down	NM_006258	chr10:54048737-54050026	PRKG1	Homo sapiens protein kinase, cGMP-dependent, type I (PRKG1), transcript variant 2, mRNA [NM_006258]	GO:0005515|GO:0030036|GO:0005794|GO:0005886|GO:0005246|GO:0090331|GO:0005524|GO:0043087|GO:0016358|GO:0005829|GO:0007165|GO:0005737|GO:0030553|GO:0007596|GO:0006468|GO:0030900|GO:0001764|GO:0004692	NM_006258	Hs.407535	5592	5	18.7201	2.32668	3.95241	5	5	5	33.2532	16.2281	6.67885	2.32271	2.33126	2.32609	4.92523	3.98617	2.94584
A_33_P3230374	0.00297954	0.36726	3.07926	down	NM_001005170	chr11:4609036-4609095	OR52I2	Homo sapiens olfactory receptor, family 52, subfamily I, member 2 (OR52I2), mRNA [NM_001005170]	GO:0004984|GO:0005886|GO:0004930|GO:0016021	NM_001005170	Hs.553607	143502	29.5154	90.3918	4.87242	6.495	27.3024	33.5399	27.7039	98.6032	78.0508	94.5213	4.64492	5.17093	4.8014	6.57021	6.12147	6.79333
A_33_P3225843	0.000465162	0.270134	3.06051	down	NM_173463	chr4:24809873-24809814	CCDC149	Homo sapiens coiled-coil domain containing 149 (CCDC149), transcript variant 1, mRNA [NM_173463]		NM_173463	Hs.106432	91050	5	15.8716	2.32668	3.94046	5	5	5	21.3485	14.54	11.7264	2.32271	2.33126	2.32609	4.24292	3.83649	3.74196
A_23_P350689	0.024766	0.570825	3.01054	down	NM_173570	chr3:113681444-113681503	ZDHHC23	Homo sapiens zinc finger, DHHC-type containing 23 (ZDHHC23), mRNA [NM_173570]	GO:0018345|GO:0008270|GO:0016021|GO:0072659|GO:0019706	NM_173570	Hs.21902	254887	8.51802	26.7372	3.06374	4.65376	9.90784	8.52725	7.11895	19.1509	21.647	39.4138	3.14688	3.20172	2.84261	4.0769	4.36764	5.51673
A_33_P3250820	0.0361688	0.605783	3.0101	down	NM_207361	chr13:39461187-39461246	FREM2	Homo sapiens FRAS1 related extracellular matrix protein 2 (FREM2), mRNA [NM_207361]	GO:0048839|GO:0007154|GO:0005886|GO:0005509|GO:0016021|GO:0007156|GO:0002009|GO:0005604	NM_207361	Hs.253994	341640	31.7368	88.1206	4.85871	6.44853	16.092	44.7524	34.3661	97.0868	92.7919	74.4829	3.87951	5.59386	5.10277	6.54721	6.35993	6.43844
A_24_P319364	0.00781566	0.447851	3.00285	down	NM_016946	chr1:160966092-160966033	F11R	Homo sapiens F11 receptor (F11R), mRNA [NM_016946]	GO:0005515|GO:0030054|GO:0005886|GO:0034329|GO:0050900|GO:0045216|GO:0006954|GO:0070830|GO:0005911|GO:0007596|GO:0019048|GO:0030855|GO:0007179|GO:0005923|GO:0016021|GO:0007155	NM_016946	Hs.517293	50848	247.837	740.56	7.85976	9.4461	324.945	166.568	251.998	519.188	1028.92	673.578	8.17755	7.46598	7.93576	8.98296	9.81011	9.54522
A_23_P205489	0.0331446	0.599317	2.99827	down	NM_182728	chr14:23594713-23594654	SLC7A8	Homo sapiens solute carrier family 7 (amino acid transporter light chain, L system), member 8 (SLC7A8), transcript variant 2, mRNA [NM_182728]	GO:0005515|GO:0019534|GO:0006520|GO:0015695|GO:0005886|GO:0006865|GO:0009636|GO:0050900|GO:0055085|GO:0015101|GO:0055065|GO:0016323|GO:0015804|GO:0005737|GO:0015171|GO:0005887|GO:0007596|GO:0042605|GO:0006810|GO:0015175|GO:0015179|GO:0006811	NM_182728	Hs.596643	23428	149.551	458.004	7.10224	8.68637	113.076	103.467	232.11	552.852	596.586	224.573	6.68875	6.79596	7.82201	9.07191	8.97925	8.00795
A_23_P356677	2.21446e-05	0.0743026	2.99494	down	NM_001130690	chr6:165745021-165744962	PDE10A	Homo sapiens phosphodiesterase 10A (PDE10A), transcript variant 1, mRNA [NM_001130690]	GO:0004114|GO:0004118|GO:0047555|GO:0010738|GO:0046069|GO:0046872|GO:0005829|GO:0007165|GO:0030552|GO:0030553|GO:0007596|GO:0043949|GO:0006198	NM_001130690	Hs.348762	10846	5	15.1959	2.32668	3.90921	5	5	5	17.6652	13.9002	14.0222	2.32271	2.33126	2.32609	3.9507	3.7735	4.00343
A_32_P37592	0.0436055	0.619509	2.98714	down	NR_003003	chr18:47340748-47340807	SCARNA17	Homo sapiens small Cajal body-specific RNA 17 (SCARNA17), guide RNA [NR_003003]		NR_003003	Hs.668351	677769	64.2232	182.46	5.86022	7.43899	43.6172	43.2408	105.812	119.907	202.427	225.047	5.32694	5.5443	6.70943	6.86357	7.44209	8.01131
A_23_P79518	0.00397014	0.387988	2.98416	down	NM_000576	chr2:113587488-113587429	IL1B	Homo sapiens interleukin 1, beta (IL1B), mRNA [NM_000576]	GO:0032755|GO:0019221|GO:0046330|GO:0002711|GO:0005615|GO:0032757|GO:0031622|GO:0030730|GO:0000165|GO:0001660|GO:0033198|GO:0034116|GO:0043123|GO:0031663|GO:0043122|GO:0032729|GO:0045410|GO:0032725|GO:0007566|GO:0030593|GO:0019904|GO:0014805|GO:0045840|GO:0005125|GO:0045086|GO:0043491|GO:0045893|GO:0045833|GO:0045080|GO:0030949|GO:0042346|GO:0050996|GO:0050995|GO:0008285|GO:0007267|GO:0035066|GO:…	NM_000576	Hs.126256	3553	27.6107	85.839	4.7639	6.34123	30.0364	21.3095	31.486	67.7238	124.473	65.32	4.78331	4.51438	4.99403	6.00658	6.76947	6.24764
A_23_P144656	0.00103892	0.313733	2.97291	down	NM_006727	chr5:24487499-24487440	CDH10	Homo sapiens cadherin 10, type 2 (T2-cadherin) (CDH10), mRNA [NM_006727]	GO:0016337|GO:0005886|GO:0034329|GO:0005509|GO:0016021|GO:0007156|GO:0045216|GO:0034332	NM_006727	Hs.92489	1008	26.8521	80.8039	4.72075	6.29263	34.3736	22.2377	23.9449	85.4788	100.661	56.2722	4.98216	4.572	4.6081	6.35454	6.47972	6.04362
A_23_P57417	0.0117123	0.496995	2.96646	down	NM_005940	chr22:24126273-24126332	MMP11	Homo sapiens matrix metallopeptidase 11 (stromelysin 3) (MMP11), mRNA [NM_005940]	GO:0031012|GO:0022617|GO:0030198|GO:0005796|GO:0030574|GO:0005509|GO:0006508|GO:0005578|GO:0008270|GO:0007275|GO:0005576|GO:0004222	NM_005940	Hs.143751	4320	14.1513	46.1663	3.81742	5.38616	15.2526	12.8733	14.3279	58.5158	57.9434	22.0395	3.80088	3.78574	3.86564	5.78261	5.69986	4.67601
A_33_P3418125	0.0484787	0.626281	2.95993	down	NM_006851	chr12:75895656-75895715	GLIPR1	Homo sapiens GLI pathogenesis-related 1 (GLIPR1), mRNA [NM_006851]	GO:0005886|GO:0005576|GO:0044281|GO:0016021|GO:0044255	NM_006851	Hs.205558	11010	18.577	59.8021	4.18809	5.75365	20.8413	20.8216	14.0682	30.0114	68.4638	80.9311	4.24676	4.47829	3.83922	4.76548	5.93734	6.55813
A_33_P3270599	0.00391783	0.387904	2.9593	down	NM_213674	chr9:35684303-35684244	TPM2	Homo sapiens tropomyosin 2 (beta) (TPM2), transcript variant 2, mRNA [NM_213674]	GO:0005862|GO:0030049|GO:0006936|GO:0043462|GO:0003779|GO:0008307|GO:0005829	NM_213674	Hs.300772	7169	531.847	1585.97	8.98221	10.5475	610.374	536.544	448.624	1121.38	1826.24	1810.31	9.09085	9.09822	8.75756	10.1048	10.6261	10.9115
A_23_P388124	0.0276309	0.579398	2.95618	down	NM_005164	chr12:39947009-39946950	ABCD2	Homo sapiens ATP-binding cassette, sub-family D (ALD), member 2 (ABCD2), mRNA [NM_005164]	GO:0005515|GO:0000038|GO:0006635|GO:0042626|GO:0055085|GO:0005524|GO:0042803|GO:0043231|GO:0005829|GO:0005739|GO:0032000|GO:0016021|GO:0005778|GO:0042760|GO:0005777	NM_005164	Hs.117852	225	5.41248	17.4137	2.46757	4.03131	5	6.23745	5	13.9498	12.3606	25.9307	2.32271	2.75392	2.32609	3.58825	3.59625	4.90942
A_23_P351305	0.0443024	0.619946	2.94695	down	NM_152704	chr13:25743420-25743361	AMER2	Homo sapiens APC membrane recruitment protein 2 (AMER2), transcript variant 1, mRNA [NM_152704]	GO:0005515|GO:0005886|GO:0005546|GO:0016055|GO:0007398|GO:0090090	NM_152704	Hs.528335	219287	1556.74	4355.4	10.4238	11.983	1283.1	905.139	2481.98	2928.45	4148.48	5989.25	10.1805	9.83362	11.2573	11.5116	11.829	12.6086
A_33_P3242548	0.0262306	0.576977	2.94256	down	NM_018699	chr4:121774633-121774574	PRDM5	Homo sapiens PR domain containing 5 (PRDM5), mRNA [NM_018699]	GO:0005515|GO:0000976|GO:0016575|GO:0044212|GO:0008168|GO:0005634|GO:0006351|GO:0046872|GO:0043565|GO:0070491|GO:0000278|GO:0045892|GO:0051567	NM_018699	Hs.666782	11107	7.11859	21.5284	2.77822	4.33529	6.82264	5.16134	9.37179	13.6697	26.3458	24.5697	2.5955	2.51122	3.22794	3.5615	4.61644	4.82793
A_23_P251836	0.00400862	0.387988	2.94248	down	NM_006174	chr4:164272405-164272464	NPY5R	Homo sapiens neuropeptide Y receptor Y5 (NPY5R), mRNA [NM_006174]	GO:0060112|GO:0005886|GO:0014050|GO:0003214|GO:0048661|GO:0003151|GO:0005737|GO:0004983|GO:0002675|GO:0007186|GO:0005887|GO:0001602|GO:0001601|GO:0032229|GO:0042755	NM_006174	Hs.519058	4889	131.13	402.825	6.99743	8.55447	124.026	107.337	162.028	385.529	565.896	257.051	6.82763	6.84438	7.3203	8.5418	8.91747	8.20413
A_23_P215634	0.0260009	0.576977	2.94205	down	NM_001013398	chr7:45952667-45952608	IGFBP3	Homo sapiens insulin-like growth factor binding protein 3 (IGFBP3), transcript variant 1, mRNA [NM_001013398]	GO:0005515|GO:0008285|GO:0031994|GO:0005634|GO:0005615|GO:0001558|GO:0010906|GO:0014912|GO:0046872|GO:0008160|GO:0044342|GO:0009968|GO:0001968|GO:0005520|GO:0043065|GO:0006915|GO:0005576|GO:0048662|GO:0016942|GO:0043568|GO:0045663|GO:0001933|GO:0006468|GO:0043410|GO:0044267	NM_001013398	Hs.450230	3486	12.0398	33.6987	3.43403	4.99085	20.2235	8.45145	7.44444	35.7232	44.6622	20.7108	4.20374	3.18998	2.90838	5.04391	5.34356	4.58509
A_23_P146444	0.0134321	0.51077	2.92432	down	NM_003389	chr9:100883421-100883362	CORO2A	Homo sapiens coronin, actin binding protein, 2A (CORO2A), transcript variant 1, mRNA [NM_003389]	GO:0035556|GO:0051015|GO:0030036|GO:0017053|GO:0015629	NM_003389	Hs.113094	7464	127.332	374.853	6.9351	8.4832	112.044	99.81	170.142	273.185	390.092	461.281	6.67646	6.74406	7.38478	8.04175	8.38148	9.02637
A_33_P3290343	0.0477493	0.626281	2.91027	down	NM_000104	chr2:38297765-38297706	CYP1B1	Homo sapiens cytochrome P450, family 1, subfamily B, polypeptide 1 (CYP1B1), mRNA [NM_000104]	GO:0019369|GO:0006725|GO:0006805|GO:0070330|GO:0005506|GO:0019373|GO:0061298|GO:0071603|GO:0009636|GO:0044281|GO:0001525|GO:0004497|GO:0019825|GO:0043542|GO:0097267|GO:0005789|GO:0016712|GO:0009404|GO:0016125|GO:0007601|GO:0008202|GO:0055114|GO:0020037	NM_000104	Hs.154654	1545	9.99549	26.7676	3.16916	4.71032	5.30684	16.9444	7.73518	24.9231	31.8636	23.5161	2.3625	4.17701	2.96797	4.48396	4.87909	4.7679
A_23_P217946	0.0335182	0.599317	2.90838	down	NM_022124	chr10:73466744-73466803	CDH23	Homo sapiens cadherin-related 23 (CDH23), transcript variant 1, mRNA [NM_022124]	GO:0005515|GO:0005886|GO:0051480|GO:0007605|GO:0005509|GO:0032420|GO:0045494|GO:0016339|GO:0016020|GO:0050957|GO:0006816|GO:0016021|GO:0007156|GO:0007601|GO:0050953|GO:0050896	NM_022124	Hs.656032	64072	8.60182	25.4995	2.97917	4.51939	9.93128	5	10.8742	20.8785	40.3225	15.2976	3.14904	2.33126	3.45722	4.21171	5.21539	4.13106
A_32_P176018	0.0253793	0.574608	2.87008	down	NM_030812	chr1:18153390-18153449	ACTL8	Homo sapiens actin-like 8 (ACTL8), mRNA [NM_030812]	GO:0005737|GO:0005856	NM_030812	Hs.2149	81569	16.2328	44.8765	3.94803	5.46913	19.2989	19.4785	9.92098	43.8133	35.2625	55.5535	4.1394	4.38947	3.31523	5.36021	5.02489	6.02227
A_23_P416711	0.0107009	0.488137	2.82562	down	NM_152996	chr1:77096543-77096602	ST6GALNAC3	Homo sapiens ST6 (alpha-N-acetyl-neuraminyl-2,3-beta-galactosyl-1,3)-N-acetylgalactosaminide alpha-2,6-sialyltransferase 3 (ST6GALNAC3), transcript variant 1, mRNA [NM_152996]	GO:0006677|GO:0009100|GO:0008373|GO:0006687|GO:0000139|GO:0006486|GO:0016021	NM_152996	Hs.337040	256435	61.2422	188.382	5.92673	7.4253	61.3719	56.7763	65.5785	250.847	218.834	95.4644	5.82175	5.92578	6.03266	7.91855	7.54871	6.80863
A_23_P167005	0.0145971	0.524359	2.81521	down	NM_014373	chr3:169802254-169802313	GPR160	Homo sapiens G protein-coupled receptor 160 (GPR160), mRNA [NM_014373]	GO:0005886|GO:0004930|GO:0016021	NM_014373	Hs.231320	26996	18.5536	54.4446	4.20463	5.69787	18.3636	16.2119	21.0852	35.6414	64.8453	62.8471	4.07036	4.11089	4.43264	5.03888	5.85788	6.19686
A_24_P55295	0.0130647	0.505751	2.79812	down	NM_000165	chr6:121770327-121770386	GJA1	Homo sapiens gap junction protein, alpha 1, 43kDa (GJA1), mRNA [NM_000165]	GO:0005515|GO:2000810|GO:0046850|GO:0015075|GO:0060307|GO:0010232|GO:0051259|GO:0005764|GO:0007512|GO:0060371|GO:0001947|GO:0007507|GO:0060373|GO:0006936|GO:0051924|GO:0006810|GO:0043123|GO:0030500|GO:0005794|GO:0048487|GO:0030165|GO:0001701|GO:0045844|GO:0001649|GO:0005887|GO:0005789|GO:0086014|GO:0060174|GO:0005921|GO:0045121|GO:0005922|GO:0002070|GO:0005882|GO:0045732|GO:0017124|GO:0008285|GO:…	NM_000165	Hs.74471	2697	1334.65	3806.66	10.2936	11.778	1505.87	1503.07	995.012	2365.11	5049.89	4004.97	10.3999	10.5636	9.91724	11.2003	12.1017	12.0321
A_23_P202427	0.00946655	0.479468	2.7934	down	NM_025130	chr10:71026958-71027017	HKDC1	Homo sapiens hexokinase domain containing 1 (HKDC1), mRNA [NM_025130]	GO:0005739|GO:0004340|GO:0008865|GO:0001678|GO:0005730|GO:0005634|GO:0019158|GO:0051156|GO:0005524|GO:0006096|GO:0005829	NM_025130	Hs.522988	80201	8.58359	23.9262	3.03457	4.51659	8.87905	5.55339	11.3183	22.7338	31.5693	17.4755	2.97622	2.60969	3.51779	4.34281	4.86773	4.33924
A_32_P2452	0.00560506	0.412833	2.7818	down	NM_175861	chr12:29653922-29653863	TMTC1	Homo sapiens transmembrane and tetratricopeptide repeat containing 1 (TMTC1), transcript variant 2, mRNA [NM_175861]	GO:0005739|GO:0016021	NM_175861	Hs.401954	83857	5.63444	15.6809	2.47488	3.9509	5.29549	5	6.60783	13.9794	14.7876	18.2757	2.36148	2.33126	2.7319	3.59066	3.85693	4.4051
A_33_P3307500	0.0436721	0.619509	2.77632	down	NM_001142620	chr15:74486784-74486725	STRA6	Homo sapiens stimulated by retinoic acid 6 (STRA6), transcript variant 5, mRNA [NM_001142620]	GO:0060426|GO:0007631|GO:0007603|GO:0005886|GO:0030325|GO:0030324|GO:0003184|GO:0048844|GO:0003281|GO:0043583|GO:0050905|GO:0007507|GO:0048589|GO:0061029|GO:0048745|GO:0042573|GO:0048520|GO:0061143|GO:0004872|GO:0097070|GO:0007612|GO:0060900|GO:0001568|GO:0048286|GO:0051183|GO:0001822|GO:0048566|GO:0001523|GO:0048546|GO:0043234|GO:0061156|GO:0060325|GO:0050890|GO:0071939|GO:0061205|GO:0061038|GO:…	NM_001142620	Hs.24553	64220	47.5463	116.549	5.36246	6.83563	79.2212	21.2042	42.2135	96.3373	144.036	109.275	6.18192	4.50842	5.39703	6.53543	6.97407	6.99738
A_23_P146849	0.023507	0.565244	2.7745	down	NM_005503	chr15:29409953-29410012	APBA2	Homo sapiens amyloid beta (A4) precursor protein-binding, family A, member 2 (APBA2), transcript variant 1, mRNA [NM_005503]	GO:0010468|GO:0005515|GO:0001540|GO:0035264|GO:0005886|GO:0007268|GO:0007626|GO:0015031|GO:0001701|GO:0007399	NM_005503	Hs.618112	321	6.81846	18.3205	2.65696	4.12919	10.1745	5	5.28095	13.1113	23.5701	18.2801	3.18787	2.33126	2.45176	3.50143	4.48037	4.40579
A_33_P3262575	0.00624962	0.424013	2.7731	down	NM_018842	chr7:97922626-97922567	BAIAP2L1	Homo sapiens BAI1-associated protein 2-like 1 (BAIAP2L1), mRNA [NM_018842]	GO:0017124|GO:0030054|GO:0005886|GO:0005730|GO:2000251|GO:0003779|GO:0005634|GO:0015629|GO:0005829|GO:0007165|GO:0009617|GO:0005737|GO:0030838|GO:0046847|GO:0070064|GO:0008093	NM_018842	Hs.656063	55971	39.0426	108.934	5.25199	6.7235	44.5383	29.9781	42.6113	149.103	91.2639	86.4344	5.3513	4.99403	5.41065	7.18358	6.33491	6.652
A_23_P40880	0.0103634	0.484805	2.76034	down	NM_178868	chr3:32411401-32411460	CMTM8	Homo sapiens CKLF-like MARVEL transmembrane domain containing 8 (CMTM8), mRNA [NM_178868]	GO:0005737|GO:0006935|GO:0005634|GO:0016021|GO:0005615|GO:0005125	NM_178868	Hs.154986	152189	26.7956	70.1363	4.64798	6.11283	41.6969	20.0839	18.606	79.8699	76.4876	54.0513	5.2615	4.43203	4.25042	6.25848	6.09958	5.98043
A_33_P3354429	0.0318626	0.596899	2.74942	down	NM_001039111	chr3:32933541-32933600	TRIM71	Homo sapiens tripartite motif containing 71, E3 ubiquitin protein ligase (TRIM71), mRNA [NM_001039111]	GO:2000177|GO:0004842|GO:2000637|GO:0072089|GO:0001843|GO:0010586|GO:0051865|GO:0060964|GO:0035278|GO:0000082|GO:0035198|GO:0000932|GO:0008543|GO:0021915|GO:0008270	NM_001039111	Hs.567678	131405	36.8657	105.882	5.16854	6.62767	33.7816	47.7449	29.0705	62.6459	142.623	112.376	4.95184	5.68272	4.87106	5.88874	6.96012	7.03414
A_24_P817863	0.00715688	0.440629	2.74291	down	NM_032504	chr2:210863469-210863528	UNC80	Homo sapiens unc-80 homolog (C. elegans) (UNC80), transcript variant 1, mRNA [NM_032504]	GO:0034220|GO:0005886|GO:0016021|GO:0055085	NM_032504	Hs.396201	285175	25.4661	66.9729	4.59577	6.05148	22.9149	17.699	35.7845	68.6851	76.6631	55.5703	4.3834	4.24145	5.16245	6.02744	6.10244	6.02456
A_24_P349039	0.0190561	0.547498	2.70869	down	NM_020754	chr3:119136009-119136068	ARHGAP31	Homo sapiens Rho GTPase activating protein 31 (ARHGAP31), mRNA [NM_020754]	GO:0051056|GO:0017124|GO:0007264|GO:0005925|GO:0030027|GO:0005829|GO:0005096	NM_020754	Hs.668218	57514	30.2652	89.6043	4.8974	6.33499	27.6336	27.2827	35.8795	59.0718	145.81	63.9309	4.66213	4.86407	5.16599	5.7982	6.98849	6.21829
A_23_P69810	0.0244298	0.5689	2.69857	down	NM_032717	chr4:84526584-84526643	AGPAT9	Homo sapiens 1-acylglycerol-3-phosphate O-acyltransferase 9 (AGPAT9), transcript variant 1, mRNA [NM_032717]	GO:0032006|GO:0005783|GO:0004366|GO:0044281|GO:0003841|GO:0005789|GO:0016024|GO:0019432|GO:0016021|GO:0006644|GO:0006654|GO:0044255|GO:0046474	NM_032717	Hs.99196	84803	39.7044	117.085	5.30056	6.73275	39.4326	42.5636	37.1171	66.3004	181.403	103.552	5.17549	5.51766	5.20852	5.97727	7.2913	6.92968
A_23_P148255	0.00980728	0.479468	2.69255	down	NM_153488	chrX:151886664-151886723	MAGEA2B	Homo sapiens melanoma antigen family A, 2B (MAGEA2B), mRNA [NM_153488]	GO:0005515|GO:0042826|GO:0005634|GO:0000122|GO:0006351|GO:0072331|GO:0016605|GO:0070491|GO:0051443|GO:0033234|GO:0044257|GO:0031625|GO:0090398	NM_153488	Hs.534597	266740	5.52123	16.158	2.50747	3.93644	5.12726	5.37416	6.06225	23.7284	10.6364	14.1094	2.34717	2.55807	2.61717	4.40704	3.38567	4.01662
A_33_P3381378	0.0261993	0.576977	2.68664	down	NM_001257096	chr20:21696522-21696581	PAX1	Homo sapiens paired box 1 (PAX1), transcript variant 2, mRNA [NM_001257096]	GO:0006366|GO:0008283|GO:0001756|GO:0043367|GO:0005634|GO:0048538|GO:0003677|GO:0001501|GO:0060017|GO:0043374|GO:0045944|GO:0060349|GO:0061056	NM_001257096	Hs.122310	5075	9.40566	26.3737	3.18844	4.61424	11.9551	7.28897	8.97285	16.3557	36.1886	26.5768	3.4301	2.97583	3.15939	3.83236	5.06411	4.94625
A_33_P3407424	0.0103051	0.484805	2.68056	down	NM_152243	chr22:37965352-37965411	CDC42EP1	Homo sapiens CDC42 effector protein (Rho GTPase binding) 1 (CDC42EP1), mRNA [NM_152243]	GO:0005515|GO:0005737|GO:0005794|GO:0005886|GO:0008360|GO:0031274|GO:0007266|GO:0015629|GO:0012505	NM_152243	Hs.225356	11135	128.102	355.688	6.94863	8.37116	124.266	93.6396	166.399	274.83	528.238	263.995	6.83034	6.65963	7.35591	8.05049	8.81888	8.24412
A_23_P31143	0.0154309	0.531427	2.67468	down	NM_001003395	chr6:125584445-125584504	TPD52L1	Homo sapiens tumor protein D52-like 1 (TPD52L1), transcript variant 2, mRNA [NM_001003395]	GO:0005515|GO:0048471|GO:0046982|GO:0006919|GO:0046330|GO:0097194|GO:0008656|GO:0042803|GO:0042802|GO:0005737|GO:0006309|GO:0043406|GO:0000086	NM_001003395	Hs.591347	7164	8.09479	23.4621	2.99221	4.41158	9.06435	8.09614	7.12389	30.6764	28.0738	11.6362	3.00775	3.12456	2.84432	4.79642	4.70592	3.73239
A_33_P3366391	0.0251904	0.573681	2.66803	down	TCONS_l2_00004831	chr11:124984692-124984751		keratin 18 pseudogene 59 [Source:HGNC Symbol;Acc:48886] [ENST00000534728]			Hs.640102		72.1842	201.067	6.15769	7.57347	65.7261	68.2694	82.5571	135.53	187.361	280.31	5.92065	6.19186	6.36058	7.05435	7.33991	8.32614
A_33_P3271651	0.00504896	0.409392	2.65803	down	NM_002121	chr6:33052784-33052843	HLA-DPB1	Homo sapiens major histocompatibility complex, class II, DP beta 1 (HLA-DPB1), mRNA [NM_002121]	GO:0050852|GO:0012507|GO:0005886|GO:0019221|GO:0031295|GO:0042613|GO:0005765|GO:0032588|GO:0030666|GO:0019886|GO:0000139|GO:0071556|GO:0030669|GO:0010008|GO:0060333|GO:0030658	NM_002121	Hs.485130	3115	5	13.924	2.32668	3.73704	5	5	5	11.4109	18.6362	11.7251	2.32271	2.33126	2.32609	3.29722	4.17231	3.74159
A_23_P258769	0.0218966	0.565244	2.65416	down	NM_002121	chr6:33054359-33054418	HLA-DPB1	Homo sapiens major histocompatibility complex, class II, DP beta 1 (HLA-DPB1), mRNA [NM_002121]	GO:0050852|GO:0012507|GO:0005886|GO:0019221|GO:0031295|GO:0042613|GO:0005765|GO:0032588|GO:0030666|GO:0019886|GO:0000139|GO:0071556|GO:0030669|GO:0010008|GO:0060333|GO:0030658	NM_002121	Hs.485130	3115	13.6482	38.6926	3.73887	5.14713	13.1667	10.6891	17.0887	26.2068	58.6164	31.2545	3.57479	3.51529	4.12653	4.55729	5.71343	5.17066
A_23_P110957	0.0174649	0.539098	2.65292	down	NM_001452	chr6:1395386-1395445	FOXF2	Homo sapiens forkhead box F2 (FOXF2), mRNA [NM_001452]	GO:0005667|GO:0003700|GO:0005634|GO:0048566|GO:0001837|GO:0003677|GO:0048596|GO:0006351|GO:0042249|GO:0043565|GO:0030198|GO:0045944|GO:0060021|GO:0048806|GO:0045893|GO:0045892|GO:0008134	NM_001452	Hs.484423	2295	5	14.1142	2.32668	3.73427	5	5	5	9.58656	18.7696	13.9865	2.32271	2.33126	2.32609	3.02109	4.18181	3.99989
A_32_P187704	0.027637	0.579398	2.64238	down		chr8:50824011-50824070	SNTG1	syntrophin, gamma 1 [Source:HGNC Symbol;Acc:13740] [ENST00000521574]	GO:0005737|GO:0007154|GO:0005543|GO:0016013|GO:0032587|GO:0005634|GO:0003779|GO:0008022|GO:0005856			54212	36.5029	101.098	5.16648	6.56832	37.925	42.9779	28.6059	156.873	72.44	73.9823	5.11937	5.53414	4.84595	7.25422	6.022	6.42874
A_23_P216501	0.0015755	0.349948	2.64026	down	NM_213674	chr9:35682147-35682088	TPM2	Homo sapiens tropomyosin 2 (beta) (TPM2), transcript variant 2, mRNA [NM_213674]	GO:0005862|GO:0030049|GO:0006936|GO:0043462|GO:0003779|GO:0008307|GO:0005829	NM_213674	Hs.300772	7169	1192.76	3146.06	10.155	11.5557	1328.56	1203.58	1046.15	2468.15	3503.22	3466.81	10.2278	10.2408	9.99633	11.26	11.5758	11.8312
A_24_P192805	0.0123136	0.502332	2.61232	down	NM_001007232	chr11:104971256-104970106	CARD17	Homo sapiens caspase recruitment domain family, member 17 (CARD17), mRNA [NM_001007232]	GO:0005737|GO:0004869|GO:0042981	NM_001007232	Hs.732627	440068	9.52925	26.2119	3.21161	4.59694	11.8653	7.26019	9.46229	22.2544	39.335	17.0463	3.42059	2.96998	3.24426	4.31232	5.17998	4.29854
A_24_P185854	0.0220498	0.565244	2.61199	down	NM_004010	chrX:31137408-31137349	DMD	Homo sapiens dystrophin (DMD), transcript variant Dp427p2, mRNA [NM_004010]	GO:0005515|GO:0030018|GO:0030055|GO:0002162|GO:2000651|GO:0060857|GO:0060048|GO:0043623|GO:0048747|GO:0021629|GO:0044458|GO:0016010|GO:0030198|GO:0045211|GO:0016013|GO:0086001|GO:0008307|GO:0005856|GO:0051647|GO:0009986|GO:0005509|GO:0043043|GO:0045213|GO:0014904|GO:0014809|GO:0043234|GO:0007517|GO:0002027|GO:0007519|GO:0010976|GO:0017166|GO:0043034|GO:0008270|GO:0017022|GO:0045121|GO:0001954|GO:…	NM_004010	Hs.495912	1756	95.9214	243.368	6.49578	7.88093	114	56.9474	116.816	185.218	259.249	285.636	6.70126	5.93053	6.85554	7.49719	7.79092	8.35467
A_23_P202219	0.00126174	0.334228	2.57778	down	NM_015916	chr10:105206820-105206761	CALHM2	Homo sapiens calcium homeostasis modulator 2 (CALHM2), transcript variant 1, mRNA [NM_015916]	GO:0016021|GO:0006811	NM_015916	Hs.241545	51063	5.55541	14.5599	2.48282	3.84895	5.47457	6.19165	5	16.0621	13.1452	14.4723	2.37918	2.7432	2.32609	3.80461	3.69147	4.05077
A_33_P3414037	9.29597e-05	0.19259	2.57675	down	XR_246147	chr10:82289412-82289353		PREDICTED: Homo sapiens uncharacterized LOC101929574 (LOC101929574), misc_RNA [XR_246147]		XR_246147			5	13.0628	2.32668	3.69224	5	5	5	13.2901	13.6366	12.2618	2.32271	2.33126	2.32609	3.52378	3.74467	3.80826
A_23_P155979	0.000834004	0.300454	2.56972	down	NM_001963	chr4:110932689-110932748	EGF	Homo sapiens epidermal growth factor (EGF), transcript variant 1, mRNA [NM_001963]	GO:0005515|GO:0005154|GO:0008284|GO:0005886|GO:0051048|GO:0007262|GO:0021940|GO:0035413|GO:0005765|GO:0005615|GO:2000008|GO:0007171|GO:0000186|GO:0030297|GO:0007173|GO:0043406|GO:1900127|GO:0031093|GO:0070371|GO:0010800|GO:0048011|GO:0090279|GO:0048015|GO:0045741|GO:0005509|GO:0042059|GO:0030168|GO:0045840|GO:0005576|GO:0018108|GO:0001525|GO:0006260|GO:0007165|GO:2000060|GO:0007596|GO:0008543|GO:…	NM_001963	Hs.419815	1950	111.266	288.191	6.77629	8.13791	117.252	122.772	93.7736	277.183	336.464	250.925	6.74715	7.04265	6.53908	8.06294	8.176	8.17478
A_33_P3295749	0.0101293	0.483318	2.55897	down	NR_072995	chr12:75796798-75796857	GLIPR1L2	Homo sapiens GLI pathogenesis-related 1 like 2 (GLIPR1L2), transcript variant 3, non-coding RNA [NR_072995]	GO:0016021	NR_072995	Hs.406728	144321	6.27592	15.7548	2.56685	3.92241	8.7286	5	5.09918	13.1578	20.2691	13.8375	2.9467	2.33126	2.42259	3.50695	4.27927	3.98101
A_23_P94230	0.00559733	0.412833	2.53812	down	NM_015364	chr8:74941211-74941270	LY96	Homo sapiens lymphocyte antigen 96 (LY96), transcript variant 1, mRNA [NM_015364]	GO:0005515|GO:0034142|GO:0005886|GO:0007249|GO:0001875|GO:0005615|GO:0002756|GO:0006954|GO:0002755|GO:0031666|GO:0032496|GO:0032497|GO:0031663|GO:0034138|GO:0046696|GO:0038124|GO:0038123|GO:0034134|GO:0015026|GO:0002224|GO:0006968|GO:0045087|GO:0035666|GO:0010008|GO:0007166	NM_015364	Hs.726603	23643	266.742	685.87	8.00558	9.34934	286.202	259.955	254.068	495.087	780.522	782	7.99139	8.07748	7.94788	8.90427	9.39546	9.74831
A_33_P3377090	0.0234729	0.565244	2.5348	down		chr5:108387134-108387075							21.2624	59.3827	4.40253	5.7444	22.6904	22.8269	18.27	39.2032	96.2938	42.651	4.37051	4.61214	4.22494	5.185	6.41398	5.63423
A_23_P383915	0.0446708	0.620576	2.52758	down	NM_144587	chr10:124097550-124097609	BTBD16	Homo sapiens BTB (POZ) domain containing 16 (BTBD16), mRNA [NM_144587]		NM_144587	Hs.422466	118663	8.07875	20.0216	2.86228	4.20004	12.5386	5	6.69761	24.784	24.8291	10.4516	3.50212	2.33126	2.75347	4.47426	4.54859	3.57726
A_33_P3273524	0.000174536	0.198371	2.51446	down	NM_033045	chr12:52771659-52771600	KRT84	Homo sapiens keratin 84 (KRT84), mRNA [NM_033045]	GO:0045616|GO:0035878|GO:0005200|GO:0045095|GO:0030280|GO:0001942	NM_033045	Hs.272336	3890	5	12.9862	2.32668	3.65693	5	5	5	15.2282	14.0413	9.68899	2.32271	2.33126	2.32609	3.71711	3.78939	3.4643
A_33_P3404588	0.0116438	0.496995	2.50539	down	NM_139241	chr12:32764149-32764208	FGD4	Homo sapiens FYVE, RhoGEF and PH domain containing 4 (FGD4), mRNA [NM_139241]	GO:0030036|GO:0030035|GO:0031267|GO:0007264|GO:0008360|GO:0030032|GO:0030175|GO:0015629|GO:0046872|GO:0005829|GO:0005085|GO:0005737|GO:0005543|GO:0007010|GO:0046847|GO:0005089|GO:0051056|GO:0048011|GO:0005794|GO:0043065|GO:0003779|GO:0001726|GO:0097190|GO:0030027|GO:0043088	NM_139241	Hs.117835	121512	98.1281	238.208	6.52841	7.85344	115.794	58.308	120.282	211.661	302.351	200.613	6.72426	5.96852	6.89246	7.68185	8.02379	7.8547
A_23_P404162	0.0272173	0.579398	2.50378	down	NM_014707	chr7:18708002-18708061	HDAC9	Homo sapiens histone deacetylase 9 (HDAC9), transcript variant 3, mRNA [NM_014707]	GO:0005515|GO:0042826|GO:0046970|GO:0005634|GO:0046872|GO:0007507|GO:0005737|GO:0006954|GO:0007219|GO:0070491|GO:0005080|GO:0030183|GO:0051153|GO:0090050|GO:0004407|GO:0046969|GO:0032041|GO:0070932|GO:0005667|GO:0070933|GO:0016575|GO:0032869|GO:0034983|GO:0003714|GO:0048742|GO:0000122|GO:0006351|GO:0033558|GO:0042113|GO:0035097|GO:0000118|GO:0005654|GO:0045892|GO:0008134	NM_014707	Hs.196054	9734	37.3388	94.5729	5.16393	6.48804	24.8396	40.8757	46.301	100.246	124.709	58.7644	4.49927	5.4573	5.53522	6.59348	6.77172	6.0989
A_33_P3876591	0.000721343	0.294367	2.50288	down	CD050382		SNORA76	AGENCOURT_13972169 NIH_MGC_173 Homo sapiens cDNA 5', mRNA sequence [CD050382]			Hs.405444	677842	21.5845	54.2703	4.42732	5.75091	23.7851	20.9244	20.0441	61.8133	49.8723	51.1252	4.43548	4.48605	4.36042	5.87119	5.47873	5.90279
A_24_P166443	0.0128396	0.504202	2.49976	down	NM_002121	chr6:33052981-33053587	HLA-DPB1	Homo sapiens major histocompatibility complex, class II, DP beta 1 (HLA-DPB1), mRNA [NM_002121]	GO:0050852|GO:0012507|GO:0005886|GO:0019221|GO:0031295|GO:0042613|GO:0005765|GO:0032588|GO:0030666|GO:0019886|GO:0000139|GO:0071556|GO:0030669|GO:0010008|GO:0060333|GO:0030658	NM_002121	Hs.485130	3115	9.0611	23.9491	3.15867	4.48046	8.85022	8.84084	9.49224	18.1227	34.9251	18.7995	2.96911	3.2561	3.2508	3.99546	5.01044	4.43548
A_23_P321354	0.0283079	0.58192	2.49957	down	NM_144649	chr8:133722596-133722537	TMEM71	Homo sapiens transmembrane protein 71 (TMEM71), transcript variant 1, mRNA [NM_144649]	GO:0016021	NM_144649	Hs.293842	137835	77.16	182.593	6.14424	7.46592	65.2118	46.1226	120.145	200.507	212.395	134.877	5.91053	5.63211	6.89008	7.60983	7.50396	7.28397
A_24_P158946	0.0339722	0.599317	2.49616	down	NM_139241	chr12:32786493-32786552	FGD4	Homo sapiens FYVE, RhoGEF and PH domain containing 4 (FGD4), mRNA [NM_139241]	GO:0030036|GO:0030035|GO:0031267|GO:0007264|GO:0008360|GO:0030032|GO:0030175|GO:0015629|GO:0046872|GO:0005829|GO:0005085|GO:0005737|GO:0005543|GO:0007010|GO:0046847|GO:0005089|GO:0051056|GO:0048011|GO:0005794|GO:0043065|GO:0003779|GO:0001726|GO:0097190|GO:0030027|GO:0043088	NM_139241	Hs.117835	121512	163.216	377.881	7.20812	8.52783	172.358	84.5533	232.737	322.619	403.964	407.059	7.28431	6.51576	7.8243	8.29145	8.42976	8.86228
A_23_P133293	0.0427039	0.618136	2.49274	down	NM_024717	chr5:94042412-94042353	MCTP1	Homo sapiens multiple C2 domains, transmembrane 1 (MCTP1), transcript variant L, mRNA [NM_024717]	GO:0005544|GO:0019722|GO:0005509|GO:0016021	NM_024717	Hs.655087	79772	93.3912	233.531	6.47993	7.79767	95.6146	62.6977	121.862	216.95	167.931	315.712	6.46083	6.0675	6.91147	7.71641	7.18835	8.48824
A_23_P344125	0.000141162	0.19259	2.4914	down	NM_199296	chr14:77941362-77941303	ISM2	Homo sapiens isthmin 2 (ISM2), transcript variant 1, mRNA [NM_199296]	GO:0005730|GO:0005634|GO:0005576	NM_199296	Hs.29742	145501	17.0346	42.8627	4.07344	5.3904	19.7539	14.3562	16.9935	47.1317	47.9078	33.5486	4.16565	3.93671	4.11796	5.47221	5.42722	5.27176
A_33_P3368750	0.0082713	0.45672	2.48897	down	NM_001104554	chr15:69699895-69699954	PAQR5	Homo sapiens progestin and adipoQ receptor family member V (PAQR5), transcript variant 1, mRNA [NM_001104554]	GO:0048477|GO:0007275|GO:0016021|GO:0005496|GO:0030154	NM_001104554	Hs.591096	54852	214.24	534.769	7.6936	9.00915	254.311	201.876	186.534	476.469	475.284	652.554	7.84076	7.72006	7.51999	8.85028	8.67083	9.50634
A_33_P3378614	0.0405235	0.617048	2.4872	down	NR_027378	chr8:63893049-63893108	UG0898H09	Homo sapiens uncharacterized LOC643763 (UG0898H09), long non-coding RNA [NR_027378]		NR_027378	Hs.491856	643763	5	14.1714	2.32668	3.64121	5	5	5	19.32	17.3473	5.84695	2.32271	2.33126	2.32609	4.09365	4.06928	2.76069
A_23_P428485	0.0460751	0.624215	2.48282	down	NM_030623	chr2:228845370-228845311	SPHKAP	Homo sapiens SPHK1 interactor, AKAP domain containing (SPHKAP), transcript variant 2, mRNA [NM_030623]	GO:0005739|GO:0005515|GO:0030018|GO:0051018	NM_030623	Hs.436306	80309	5.8335	15.5264	2.45985	3.77183	7.50051	5	5	25.4207	14.2402	6.91826	2.72221	2.33126	2.32609	4.51525	3.80826	2.99199
A_33_P3303890	5.2128e-09	0.000157416	2.45779	down	BC140752	chr11:5142000-5141941	OR52A4	Homo sapiens olfactory receptor, family 52, subfamily A, member 4, mRNA (cDNA clone MGC:176429 IMAGE:9021620), complete cds. [BC140752]	GO:0004984|GO:0005886|GO:0004930|GO:0016021		Hs.553729	390053	5	12.5624	2.32668	3.62405	5	5	5	14.3374	12.6733	10.6764	2.32271	2.33126	2.32609	3.62444	3.63526	3.61244
A_23_P51187	0.0356881	0.602915	2.45343	down	NM_002744	chr1:2116703-2116762	PRKCZ	Homo sapiens protein kinase C, zeta (PRKCZ), transcript variant 1, mRNA [NM_002744]	GO:2000553|GO:0005515|GO:0032753|GO:0030054|GO:0050732|GO:0015459|GO:0060291|GO:0030010|GO:0043560|GO:0018105|GO:0047496|GO:0043274|GO:0046326|GO:0007179|GO:0070374|GO:0035748|GO:2000664|GO:0031584|GO:2000667|GO:2000463|GO:0007616|GO:0019901|GO:0031532|GO:0051346|GO:0019904|GO:0030168|GO:0043234|GO:0060081|GO:0008270|GO:0045121|GO:0005923|GO:0004697|GO:0001954|GO:0008286|GO:2001181|GO:0048471|GO:…	NM_002744	Hs.496255	5590	105.457	243.759	6.60585	7.90065	65.6776	88.2801	162.414	254.907	247.4	228.971	5.91925	6.57565	7.32265	7.94114	7.72569	8.03513
A_33_P3326634	0.0235496	0.565244	2.44442	down	NM_001164617	chrX:132730535-132730476	GPC3	Homo sapiens glypican 3 (GPC3), transcript variant 1, mRNA [NM_001164617]	GO:0005515|GO:0045732|GO:0001658|GO:0007603|GO:0005886|GO:0060422|GO:0030324|GO:2000096|GO:0050680|GO:0045879|GO:0030282|GO:0044281|GO:0009653|GO:0005615|GO:0072180|GO:0045807|GO:0060976|GO:0045880|GO:0030513|GO:0072138|GO:0009948|GO:0046326|GO:0030204|GO:0090090|GO:0046658|GO:0030203|GO:0045926|GO:0043202|GO:0010171|GO:0005975|GO:0005796|GO:0005578|GO:0030316|GO:0006027|GO:0043395|GO:0001523|GO:…	NM_001164617	Hs.644108	2719	7.66593	20.3132	2.91032	4.19981	8.67299	7.54413	6.78068	26.2624	24.816	9.86129	2.93736	3.02205	2.77155	4.56141	4.54714	3.49088
A_33_P3635136	0.0303724	0.592425	2.43775	down	BF346224	chr6:8086714-8086655		602018404F1 NCI_CGAP_Brn67 Homo sapiens cDNA clone IMAGE:4154136 5', mRNA sequence [BF346224]			Hs.659987		75.4186	203.09	6.22252	7.50807	80.1575	70.9152	75.183	114.519	327.225	167.525	6.20037	6.2443	6.22288	6.79045	8.13682	7.59693
A_33_P3256914	0.00174288	0.349948	2.42311	down	NR_104317	chr16:318911-318970	ITFG3	Homo sapiens integrin alpha FG-GAP repeat containing 3 (ITFG3), transcript variant 3, non-coding RNA [NR_104317]	GO:0016021	NR_104317	Hs.513225	83986	10.825	26.2692	3.40935	4.68621	10.2617	12.3908	9.82252	30.7132	27.1192	20.9753	3.20038	3.7274	3.30028	4.79763	4.6568	4.60421
A_23_P396115	0.000170039	0.198371	2.42286	down	NM_173358	chrX:52677350-52674574	SSX7	Homo sapiens synovial sarcoma, X breakpoint 7 (SSX7), mRNA [NM_173358]	GO:0006355|GO:0005634|GO:0003676|GO:0006351	NM_173358	Hs.558712	280658	5.72648	13.5711	2.46416	3.74087	6.88855	5	5.2909	15.7742	12.7328	12.2062	2.60799	2.33126	2.45323	3.7766	3.64357	3.80244
A_33_P3243093	0.0124526	0.502422	2.41798	down	NM_003617	chr1:163115775-163115716	RGS5	Homo sapiens regulator of G-protein signaling 5 (RGS5), transcript variant 1, mRNA [NM_003617]	GO:0043547|GO:0007165|GO:0005737|GO:0008277|GO:0005886|GO:0038032|GO:0005096	NM_003617	Hs.24950	8490	53.5353	131.288	5.73097	7.00477	52.7983	50.0762	57.7314	103.714	126.385	163.765	5.59785	5.74781	5.84724	6.64344	6.80175	7.56912
A_23_P215566	0.0204873	0.562093	2.41707	down	NM_001621	chr7:17384999-17385058	AHR	Homo sapiens aryl hydrocarbon receptor (AHR), mRNA [NM_001621]	GO:0005515|GO:0010468|GO:0003700|GO:0006805|GO:0044212|GO:0006366|GO:0045899|GO:0003705|GO:0051879|GO:0005634|GO:0005737|GO:0046983|GO:0030850|GO:0004879|GO:0004871|GO:0009410|GO:0005667|GO:0006355|GO:0001568|GO:0046982|GO:0006357|GO:0005730|GO:0006950|GO:0006915|GO:0030888|GO:0000122|GO:0003677|GO:0043565|GO:0007049|GO:0034752|GO:0030522|GO:0008134	NM_001621	Hs.171189	196	617.1	1464.68	9.1733	10.4466	619.922	772.661	458.716	1224.15	1335.85	1834.05	9.11858	9.61135	8.78996	10.2317	10.1718	10.9361
A_23_P210176	0.0342452	0.59935	2.40691	down	NM_000210	chr2:173370556-173370615	ITGA6	Homo sapiens integrin, alpha 6 (ITGA6), transcript variant 2, mRNA [NM_000210]	GO:0005515|GO:2001237|GO:0030056|GO:0033627|GO:0005886|GO:0050900|GO:0046872|GO:0009925|GO:0030198|GO:0031668|GO:0045944|GO:0031581|GO:0042475|GO:0046847|GO:0008305|GO:0022409|GO:0043065|GO:0034329|GO:0005604|GO:0005178|GO:0007160|GO:0007596|GO:0007229|GO:0050873|GO:0007044|GO:0009897|GO:0042327	NM_000210	Hs.133397	3655	123.676	301.226	6.8524	8.11958	178.62	114.151	78.2563	330.053	405.682	167.944	7.33165	6.93863	6.28692	8.32011	8.43692	7.60172
A_23_P54469	0.0050543	0.409392	2.40188	down	NM_145805	chr15:76632819-76632878	ISL2	Homo sapiens ISL LIM homeobox 2 (ISL2), mRNA [NM_145805]	GO:0043565|GO:0031290|GO:0021524|GO:0003700|GO:0045665|GO:0048666|GO:0021520|GO:0048935|GO:0008270|GO:0005634|GO:0003677	NM_145805	Hs.444677	64843	6.86125	16.7445	2.73985	4.00401	8.92356	5.49236	6.16782	15.61	21.7972	12.8263	2.9873	2.59149	2.64075	3.75679	4.37573	3.87951
A_24_P320163	0.00371555	0.377589	2.39675	down	NR_026769	chr4:74920451-74920392	PPBPP2	Homo sapiens pro-platelet basic protein pseudogene 2 (PPBPP2), non-coding RNA [NR_026769]		NR_026769	Hs.3134	10895	6.12905	13.8904	2.5175	3.77858	8.38715	5	5	14.8445	13.2896	13.5373	2.89516	2.33126	2.32609	3.67864	3.7064	3.9507
A_23_P19624	0.0330155	0.599317	2.38177	down	NM_001718	chr6:7881395-7881454	BMP6	Homo sapiens bone morphogenetic protein 6 (BMP6), mRNA [NM_001718]	GO:0051216|GO:0001654|GO:0050714|GO:0060395|GO:0005615|GO:0030539|GO:0006955|GO:0005737|GO:0006954|GO:0045944|GO:0032526|GO:0050679|GO:0030501|GO:0046982|GO:0001822|GO:0031988|GO:0010862|GO:0051384|GO:0003323|GO:0030509|GO:0005125|GO:0001649|GO:0045669|GO:0001958|GO:0001501|GO:0001938|GO:0070700|GO:0045666|GO:2000105|GO:0008083|GO:0040007|GO:0045603|GO:0032349	NM_001718	Hs.285671	654	75.6112	173.383	6.15794	7.40998	54.1822	63.5216	109.13	139.163	184.821	196.165	5.63234	6.08503	6.75647	7.08666	7.32265	7.82063
A_23_P83683	0.00981994	0.479468	2.38035	down	NM_014429	chr3:108677414-108677355	MORC1	Homo sapiens MORC family CW-type zinc finger 1 (MORC1), mRNA [NM_014429]	GO:0008270|GO:0007275|GO:0005634|GO:0007283|GO:0005524|GO:0030154	NM_014429	Hs.591296	27136	21.7002	52.2715	4.42801	5.67918	20.1368	20.1688	24.7949	41.984	55.77	59.0605	4.1959	4.43715	4.65097	5.29006	5.64171	6.10578
A_33_P3398722	0.027564	0.579398	2.37836	down	BC030136	chr4:121844696-121844755	PRDM5	Homo sapiens PR domain containing 5, mRNA (cDNA clone IMAGE:4137157), partial cds. [BC030136]	GO:0005515|GO:0000976|GO:0016575|GO:0044212|GO:0008168|GO:0005634|GO:0006351|GO:0046872|GO:0043565|GO:0070491|GO:0000278|GO:0045892|GO:0051567		Hs.669312	11107	5	12.511	2.32668	3.57665	5	5	5	8.62947	14.2552	14.6485	2.32271	2.33126	2.32609	2.85393	3.80986	4.06617
A_33_P3220615	0.0323001	0.598405	2.36636	down	NM_001004317	chr6:105531071-105531130	LIN28B	Homo sapiens lin-28 homolog B (C. elegans) (LIN28B), mRNA [NM_001004317]	GO:0005739|GO:0005515|GO:0006355|GO:0005737|GO:0031054|GO:0003723|GO:0005730|GO:0031123|GO:0008270|GO:0005634|GO:0003677|GO:0010587	NM_001004317	Hs.23616	389421	998.387	2415.33	9.88224	11.1249	924.667	1205.44	865.052	1780.98	2059.05	3405.96	9.69728	10.2428	9.70663	10.7754	10.7918	11.8074
A_24_P463891	0.0189316	0.547498	2.36588	down	NM_006581	chr6:96663001-96663060	FUT9	Homo sapiens fucosyltransferase 9 (alpha (1,3) fucosyltransferase) (FUT9), mRNA [NM_006581]	GO:0046920|GO:0042355|GO:0005794|GO:0005975|GO:0032580|GO:0008417|GO:0006486|GO:0016021|GO:0036065|GO:0007399	NM_006581	Hs.49117	10690	23.5978	54.3599	4.50956	5.75193	22.3613	17.2396	31.1924	53.1731	48.0661	61.8404	4.34864	4.20041	4.97962	5.64536	5.43217	6.17828
A_23_P141665	0.0477551	0.626281	2.36579	down	NM_014565	chr17:3118958-3119017	OR1A1	Homo sapiens olfactory receptor, family 1, subfamily A, member 1 (OR1A1), mRNA [NM_014565]	GO:0050911|GO:0007608|GO:0004984|GO:0005886|GO:0004930|GO:0016021	NM_014565	Hs.532688	8383	5.55542	13.4187	2.40705	3.64937	6.66628	5	5	17.1289	6.75177	16.3755	2.5638	2.33126	2.32609	3.90692	2.80406	4.23713
A_23_P25698	0.0177438	0.540363	2.36142	down	NM_003049	chr14:70242941-70242882	SLC10A1	Homo sapiens solute carrier family 10 (sodium/bile acid cotransporter), member 1 (SLC10A1), mRNA [NM_003049]	GO:0016323|GO:0005886|GO:0005887|GO:0015721|GO:0008508|GO:0006810|GO:0008206|GO:0044281	NM_003049	Hs.952	6554	10.2406	26.2129	3.33797	4.57762	11.8229	9.37736	9.52147	25.2446	38.7183	14.6758	3.41559	3.34175	3.25656	4.50491	5.15705	4.07091
A_23_P411806	0.0441761	0.619509	2.34588	down	NM_080546	chr9:108136938-108136997	SLC44A1	Homo sapiens solute carrier family 44 (choline transporter), member 1 (SLC44A1), transcript variant 1, mRNA [NM_080546]	GO:0015220|GO:0005886|GO:0015871|GO:0005741|GO:0044281|GO:0016021|GO:0006644|GO:0055085|GO:0046474|GO:0006656	NM_080546	Hs.573495	23446	50.643	109.362	5.51994	6.75007	58.1673	24.6094	69.1523	100.417	135.852	91.8174	5.74439	4.71584	6.09958	6.59617	6.90478	6.74925
A_23_P215828	0.0120922	0.497493	2.34564	down	NM_022820	chr7:99463831-99463890	CYP3A43	Homo sapiens cytochrome P450, family 3, subfamily A, polypeptide 43 (CYP3A43), transcript variant 1, mRNA [NM_022820]	GO:0004497|GO:0006805|GO:0070330|GO:0005506|GO:0005789|GO:0044281|GO:0020037		Hs.306220	64816	11.2191	27.0232	3.45989	4.68987	10.6872	9.04492	13.9251	22.8408	36.8906	21.338	3.26121	3.29141	3.82706	4.35294	5.08774	4.62894
A_23_P311585	0.000116611	0.19259	2.33693	down	NM_030975	chr17:39412155-39412214	KRTAP9-9	Homo sapiens keratin associated protein 9-9 (KRTAP9-9), mRNA [NM_030975]	GO:0045095	NM_030975	Hs.722077	81870	5.18964	12.5182	2.38274	3.60735	5.22694	5	5.34199	14.4853	13.3479	9.72149	2.35536	2.33126	2.46159	3.6382	3.71279	3.47107
A_23_P135061	0.00118921	0.329464	2.33554	down	NM_003389	chr9:100886921-100886862	CORO2A	Homo sapiens coronin, actin binding protein, 2A (CORO2A), transcript variant 1, mRNA [NM_003389]	GO:0035556|GO:0051015|GO:0030036|GO:0017053|GO:0015629	NM_003389	Hs.113094	7464	134.743	323.23	7.05593	8.27968	124.696	133.705	145.829	293.455	417.454	258.78	6.83628	7.16296	7.16854	8.14777	8.47645	8.21482
A_23_P110266	0.0275445	0.579398	2.33016	down	NM_024574	chr4:121957475-121957416	NDNF	Homo sapiens neuron-derived neurotrophic factor (NDNF), mRNA [NM_024574]	GO:0031012|GO:0019800|GO:0043524|GO:0030198|GO:0010976|GO:0010811|GO:0016049|GO:0005576|GO:0005539|GO:0001764|GO:0008201	NM_024574	Hs.709520	79625	130.187	305.51	6.93903	8.15946	120.159	85.5007	184.901	244.824	443.856	227.85	6.7784	6.53204	7.50664	7.87989	8.57039	8.02808
A_24_P22943	0.00296803	0.36726	2.32844	down	NM_133261	chr19:3590057-3590116	GIPC3	Homo sapiens GIPC PDZ domain containing family, member 3 (GIPC3), mRNA [NM_133261]		NM_133261	Hs.266873	126326	33.8815	77.7636	5.06094	6.28031	34.8976	27.9746	38.7724	81.471	72.0373	79.7824	5.00531	4.90111	5.2764	6.28659	6.01346	6.54087
A_23_P148121	0.0138488	0.515154	2.32806	down	NM_001099409	chr11:65357976-65358035	EHBP1L1	Homo sapiens EH domain binding protein 1-like 1 (EHBP1L1), mRNA [NM_001099409]	GO:0008150|GO:0003674|GO:0005575	NM_001099409	Hs.502867	254102	84.9916	204.074	6.37248	7.59161	69.3272	75.6379	110.01	170.128	290.941	151.154	5.99541	6.35153	6.7705	7.3646	7.96059	7.44965
A_24_P163237	0.000128327	0.19259	2.32358	down	NM_020225	chr4:184938430-184938489	STOX2	Homo sapiens storkhead box 2 (STOX2), mRNA [NM_020225]	GO:0003674|GO:0001893|GO:0009790|GO:0005575	NM_020225	Hs.696657	56977	43.9953	103.364	5.45308	6.66942	46.2268	41.7697	43.9893	116.877	112.013	81.2018	5.41111	5.49271	5.4554	6.82573	6.62051	6.56203
A_23_P91910	0.035605	0.602915	2.31749	down	NM_020353	chr3:145910678-145910619	PLSCR4	Homo sapiens phospholipid scramblase 4 (PLSCR4), transcript variant 2, mRNA [NM_020353]	GO:0005515|GO:0017121|GO:0017124|GO:0071222|GO:0042609|GO:0005886|GO:0007596|GO:0017128|GO:0005509|GO:0016021|GO:0019899	NM_020353	Hs.477869	57088	5.10007	12.6304	2.36957	3.58213	5	5	5.3002	8.3759	15.3447	14.1705	2.32271	2.33126	2.45474	2.81154	3.91288	4.02198
A_23_P360754	0.0155354	0.531902	2.31489	down	NM_005099	chr1:161159705-161159646	ADAMTS4	Homo sapiens ADAM metallopeptidase with thrombospondin type 1 motif, 4 (ADAMTS4), mRNA [NM_005099]	GO:0005515|GO:0001501|GO:0006508|GO:0005578|GO:0008270|GO:0008233|GO:0004222|GO:0002020|GO:0005615|GO:0008237	NM_005099	Hs.211604	9507	1265.42	2917.8	10.2298	11.4407	1023.68	1335.46	1437.11	2247.05	2902.13	3604.22	9.84213	10.3977	10.4495	11.1268	11.3121	11.8832
A_24_P335092	0.0262379	0.576977	2.30362	down	NM_000331	chr11:18290868-18291310	SAA1	Homo sapiens serum amyloid A1 (SAA1), transcript variant 1, mRNA [NM_000331]	GO:0001664|GO:0030593|GO:0030168|GO:0050716|GO:0005576|GO:0006953|GO:0050715|GO:0007204|GO:0045785|GO:0034364|GO:0071682|GO:0050728|GO:0045087|GO:0050708|GO:0048247|GO:0048246	NM_000331	Hs.632144	6288	6.12501	15.29	2.63746	3.84136	5	5.59053	7.78451	11.9835	21.9785	11.908	2.32271	2.61628	2.97338	3.37161	4.38489	3.76758
A_33_P3708413	0.0208616	0.562512	2.29958	down	NM_003480	chr12:8800746-8800687	MFAP5	Homo sapiens microfibrillar associated protein 5 (MFAP5), mRNA [NM_003480]	GO:0030198|GO:0001527|GO:0005576|GO:0043206|GO:0005201	NM_003480	Hs.512842	8076	55.2229	139.229	5.77774	6.97911	53.2032	57.6286	54.8368	102.284	225.448	89.9543	5.60939	5.9504	5.77342	6.62116	7.59552	6.72066
A_23_P64173	0.0324075	0.598405	2.29856	down	NM_001017534	chr11:104915286-104915227	CARD16	Homo sapiens caspase recruitment domain family, member 16 (CARD16), transcript variant 1, mRNA [NM_001017534]	GO:0005622|GO:0004869|GO:0042981	NM_001017534	Hs.348365	114769	69.0969	170.874	6.06471	7.26544	76.0595	48.949	82.2823	129.102	281.442	102.078	6.12147	5.71777	6.35488	6.97555	7.91169	6.90908
A_23_P69699	0.00139872	0.348206	2.29761	down	NM_000909	chr4:164245435-164245376	NPY1R	Homo sapiens neuropeptide Y receptor Y1 (NPY1R), mRNA [NM_000909]	GO:0005515|GO:0007631|GO:0005886|GO:0007193|GO:0019233|GO:0003151|GO:0004983|GO:0005887|GO:0007187|GO:0040014|GO:0001602|GO:0008217|GO:0001601|GO:0006006|GO:0007626	NM_000909	Hs.519057	4886	3333.38	7614.97	11.6266	12.8267	4011.32	3153.26	2835.56	6840.86	9660.38	6343.67	11.8346	11.5883	11.4569	12.7477	13.0337	12.6987
A_33_P3304655	0.0317436	0.596899	2.28935	down	NM_206943	chr2:33590413-33590472	LTBP1	Homo sapiens latent transforming growth factor beta binding protein 1 (LTBP1), transcript variant 1, mRNA [NM_206943]	GO:0031012|GO:0005515|GO:0035583|GO:0019838|GO:0030198|GO:0005509|GO:0005578|GO:0005024|GO:0005576	NM_206943	Hs.619315	4052	5.62016	13.5798	2.42047	3.61541	6.86049	5	5	14.2528	19.5598	6.92682	2.60406	2.33126	2.32609	3.61703	4.23375	2.99544
A_33_P3258061	0.0415472	0.618051	2.28694	down	NM_001145028	chr19:14164238-14164179	PALM3	Homo sapiens paralemmin 3 (PALM3), mRNA [NM_001145028]	GO:0005515|GO:0008063|GO:0005737|GO:0005886|GO:0001960|GO:0032496|GO:0005524	NM_001145028	Hs.444298	342979	733.726	1579.75	9.37129	10.5647	704.103	1045.4	451.67	1290.08	1702.46	1746.69	9.30462	10.0409	8.76838	10.3041	10.5262	10.8639
A_23_P333640	0.00065903	0.282178	2.28383	down	NM_173462	chr14:73741117-73741176	PAPLN	Homo sapiens papilin, proteoglycan-like sulfated glycoprotein (PAPLN), mRNA [NM_173462]	GO:0004867|GO:0008270|GO:0004222|GO:0005604	NM_173462	Hs.509909	89932	13.4799	30.8505	3.73909	4.93054	13.3754	11.6272	15.4371	32.0346	33.3432	27.1739	3.6026	3.63617	3.97849	4.8713	4.9416	4.97871
A_33_P3219965	0.0313242	0.596899	2.28038	down	NM_006019	chr11:67818227-67818286	TCIRG1	Homo sapiens T-cell, immune regulator 1, ATPase, H+ transporting, lysosomal V0 subunit A3 (TCIRG1), transcript variant 1, mRNA [NM_006019]	GO:0008286|GO:0005215|GO:0008284|GO:0051701|GO:0005886|GO:0015078|GO:0005765|GO:0055085|GO:0000220|GO:0005739|GO:0006879|GO:0033572|GO:0016324|GO:0006968|GO:0005887|GO:0030670|GO:0015991|GO:0090382|GO:0010008|GO:0015992	NM_006019	Hs.495985	10312	86.3086	197.976	6.34639	7.53566	79.061	57.4047	122.46	212.431	263.513	117.985	6.17867	5.94211	6.91839	7.68666	7.81344	7.10689
A_23_P17134	0.000153062	0.19259	2.27079	down	NM_002371	chr2:95719595-95719654	MAL	Homo sapiens mal, T-cell differentiation protein (MAL), transcript variant a, mRNA [NM_002371]	GO:0005515|GO:0005783|GO:0042552|GO:0006915|GO:0045176|GO:0007417|GO:0030154|GO:0008289|GO:0016505|GO:0016324|GO:0005887|GO:0045121|GO:0001766|GO:0019911|GO:0005768|GO:0015267|GO:0019898	NM_002371	Hs.80395	4118	7.06645	16.0685	2.79685	3.98005	7.7476	6.07693	7.3748	17.0087	17.8042	13.3925	2.77367	2.71818	2.8987	3.89505	4.10976	3.93532
A_23_P407080	0.00458969	0.401738	2.25241	down	NM_173489	chr5:41004473-41000902	MROH2B	Homo sapiens maestro heat-like repeat family member 2B (MROH2B), mRNA [NM_173489]		NM_173489	Hs.97714	133558	5.7204	12.5669	2.43741	3.60888	7.1612	5	5	16.5282	9.75924	11.4132	2.65488	2.33126	2.32609	3.84808	3.2726	3.70596
A_33_P3374723	0.0229331	0.565244	2.23782	down	NM_001128128	chr10:31818063-31818122	ZEB1	Homo sapiens zinc finger E-box binding homeobox 1 (ZEB1), transcript variant 1, mRNA [NM_001128128]	GO:0005515|GO:0007389|GO:0003700|GO:0008285|GO:0010464|GO:0051216|GO:0008283|GO:0071560|GO:0033081|GO:0048704|GO:0005634|GO:0048752|GO:0048596|GO:0005737|GO:0006955|GO:0003690|GO:0071230|GO:0030857|GO:0045944|GO:0090103|GO:0031667|GO:0017015|GO:0005667|GO:0014823|GO:0051150|GO:0006357|GO:0003714|GO:0003713|GO:0005730|GO:0070888|GO:0000122|GO:0006351|GO:0043565|GO:0045666|GO:0003682|GO:0008270|GO:…	NM_001128128	Hs.124503	6935	47.8734	105.727	5.54985	6.71195	36.6085	49.8413	57.1703	128.745	87.8112	100.625	5.07506	5.74166	5.83284	6.97055	6.27801	6.88728
A_33_P3293446	0.0330141	0.599317	2.23265	down	NM_020848	chr10:30303489-30303430	KIAA1462	Homo sapiens KIAA1462 (KIAA1462), mRNA [NM_020848]	GO:0005912|GO:0005911|GO:0007155	NM_020848	Hs.533953	57608	119.315	263.154	6.82732	7.98608	140.136	75.0506	142.758	196.689	276.765	316.008	6.99871	6.34243	7.14083	7.5828	7.88623	8.4892
A_24_P140608	0.014915	0.528431	2.22913	down	NM_001945	chr5:139713111-139713052	HBEGF	Homo sapiens heparin-binding EGF-like growth factor (HBEGF), mRNA [NM_001945]	GO:0051545|GO:0051897|GO:0048011|GO:0005154|GO:0035313|GO:0030335|GO:0051549|GO:0009986|GO:0030307|GO:0090303|GO:0048015|GO:0008016|GO:0005576|GO:0048661|GO:0005615|GO:0007165|GO:0007517|GO:0007173|GO:0005887|GO:0008543|GO:0045087|GO:0008083|GO:0008201|GO:0038095	NM_001945	Hs.799	1839	42.4487	100.269	5.39502	6.5515	42.4395	47.4595	37.447	79.4593	150.457	70.8903	5.28583	5.67521	5.22401	6.25136	7.03606	6.36708
A_33_P3389261	0.0181772	0.544273	2.22411	down	NM_001142645	chr2:191371678-191371619	TMEM194B	Homo sapiens transmembrane protein 194B (TMEM194B), mRNA [NM_001142645]	GO:0016021	NM_001142645	Hs.659824	100131211	27.35	58.8327	4.70547	5.85869	21.8414	21.4227	38.786	56.7441	69.2777	50.4765	4.31735	4.52201	5.27705	5.7367	5.9569	5.88248
A_32_P76627	0.00822868	0.456177	2.22179	down	TCONS_l2_00011623	chr17:16722625-16722566		HUMKEREP keratin {Homo sapiens} (exp=-1; wgp=0; cg=0), partial (72%) [THC2531223]					51.169	113.685	5.65358	6.8053	46.7907	43.2999	63.4163	92.9185	136.393	111.743	5.42875	5.54697	5.985	6.48118	6.91057	7.02415
A_33_P3338166	0.00339568	0.377589	2.20666	down	NM_030952	chr1:205271252-205271193	NUAK2	Homo sapiens NUAK family, SNF1-like kinase, 2 (NUAK2), mRNA [NM_030952]	GO:0005515|GO:0043066|GO:0030036|GO:0000287|GO:0004674|GO:0006915|GO:0006468|GO:0042149|GO:0005524	NM_030952	Hs.497512	81788	106.176	233.45	6.69956	7.84143	124.579	109.69	84.2583	229.639	242.807	227.904	6.83463	6.87504	6.38902	7.79291	7.70285	8.02851
A_33_P3389912	0.0159611	0.533486	2.2058	down	AK127083	chr14:70139235-70139294	LOC100130542	Homo sapiens cDNA FLJ45140 fis, clone BRAWH3040297. [AK127083]			Hs.678537	100130542	5.58965	13.5173	2.52738	3.66868	5	5.67526	6.09368	20.5401	10.245	9.7667	2.32271	2.63424	2.62519	4.19252	3.33297	3.48054
A_23_P214080	0.000382423	0.27008	2.20343	down	NM_001964	chr5:137804891-137804950	EGR1	Homo sapiens early growth response 1 (EGR1), mRNA [NM_001964]	GO:0005515|GO:0003700|GO:0006366|GO:0048709|GO:0019221|GO:0060291|GO:0042220|GO:0072303|GO:0003690|GO:0043525|GO:0060337|GO:0048169|GO:0051602|GO:0007611|GO:0031667|GO:0035035|GO:0032869|GO:0000976|GO:0030509|GO:0000122|GO:0000979|GO:0071317|GO:0071383|GO:0007623|GO:0005654|GO:0071873|GO:0045893|GO:0008134|GO:0045471|GO:0072110|GO:0005634|GO:0071480|GO:0035914|GO:0046872|GO:0071372|GO:0005737|GO:…	NM_001964	Hs.326035	1958	1072.97	2312.27	9.99254	11.1323	1210.76	1085.57	922.568	2271.48	2467.72	2197.61	10.0844	10.094	9.79917	11.1418	11.0657	11.1894
A_23_P113462	0.0117315	0.496995	2.19607	down	NM_017641	chr12:39687030-39687018	KIF21A	Homo sapiens kinesin family member 21A (KIF21A), transcript variant 2, mRNA [NM_017641]	GO:0008017|GO:0005515|GO:0005871|GO:0005737|GO:0005874|GO:0003777|GO:0005524|GO:0007018	NM_017641	Hs.374201	55605	5	11.7615	2.32668	3.46161	5	5	5	14.8678	13.7314	6.68549	2.32271	2.33126	2.32609	3.68036	3.75732	2.94715
A_23_P404536	0.0195204	0.551263	2.19582	down	NM_005021	chr6:132061520-132067984	ENPP3	Homo sapiens ectonucleotide pyrophosphatase/phosphodiesterase 3 (ENPP3), mRNA [NM_005021]	GO:0048471|GO:0004551|GO:0005576|GO:0009143|GO:0006796|GO:0003676|GO:0046872|GO:0030505|GO:0006955|GO:0004528|GO:0047429|GO:0005887|GO:0030247|GO:0035529|GO:0005044	NM_005021	Hs.486489	5169	16.6959	37.6483	4.0388	5.17356	15.5071	13.7694	20.8113	28.8174	47.5971	36.5305	3.82387	3.87519	4.41734	4.70766	5.4192	5.39382
A_32_P228268	0.00210521	0.358224	2.19475	down	NM_207437	chr12:124419946-124420005	DNAH10	Homo sapiens dynein, axonemal, heavy chain 10 (DNAH10), mRNA [NM_207437]	GO:0030286|GO:0005874|GO:0035085|GO:0003777|GO:0016887|GO:0005524|GO:0007018	NM_207437	Hs.622654	196385	12.9419	28.4285	3.68348	4.81753	12.7067	12.1439	13.9752	29.0337	27.0448	29.2068	3.51997	3.69842	3.83204	4.72035	4.65291	5.07934
A_23_P114947	0.0152105	0.530524	2.19449	down	NM_002923	chr1:192781051-192781110	RGS2	Homo sapiens regulator of G-protein signaling 2, 24kDa (RGS2), mRNA [NM_002923]	GO:0005515|GO:0005516|GO:0045744|GO:0005886|GO:0005730|GO:0038032|GO:0007283|GO:0010519|GO:0006417|GO:0060087|GO:0005829|GO:0043547|GO:0005739|GO:0010614|GO:0005737|GO:0007049|GO:0008277|GO:0060452|GO:0050873|GO:0043407|GO:0009898|GO:0055119|GO:0071877|GO:0005096	NM_002923	Hs.78944	5997	291.793	644.28	8.11814	9.25203	292.924	348.168	234.286	498.339	896.34	538.161	8.03068	8.48824	7.8355	8.91469	9.60814	9.23326
A_23_P14975	0.0167844	0.538202	2.19019	down	NM_032140	chr16:67697090-67697031	ENKD1	Homo sapiens enkurin domain containing 1 (ENKD1), mRNA [NM_032140]	GO:0005881|GO:0015630	NM_032140	Hs.729159	84080	89.0582	203.482	6.45759	7.58864	90.1603	101.105	75.909	277.457	195.326	137.662	6.3735	6.76119	6.23808	8.06515	7.39122	7.30955
A_23_P83838	0.0228281	0.565244	2.16802	down	NM_004056	chr8:61102510-61102451	CA8	Homo sapiens carbonic anhydrase VIII (CA8), mRNA [NM_004056]	GO:0005737|GO:0048015|GO:0008270|GO:0004089|GO:0006730	NM_004056	Hs.654388	767	14.8116	31.5743	3.84104	4.95742	18.544	15.5051	10.3858	29.1747	29.2748	36.2735	4.08576	4.04841	3.38897	4.72663	4.76384	5.38181
A_23_P19369	0.00775308	0.447429	2.16638	down	NM_017640	chr6:25620055-25620114	LRRC16A	Homo sapiens leucine rich repeat containing 16A (LRRC16A), transcript variant 1, mRNA [NM_017640]	GO:0005737|GO:0016477|GO:0007596|GO:0030032|GO:0007015|GO:0005634|GO:0046415|GO:0031529|GO:0030027|GO:0005829	NM_017640	Hs.649550	55604	30.6525	67.5562	4.92391	6.0392	31.2177	27.0605	33.6794	52.2136	82.0996	68.3555	4.84369	4.85462	5.07342	5.62044	6.18621	6.31094
A_23_P423074	0.0338326	0.599317	2.16406	down	NM_015566	chr5:74076074-74076015	FAM169A	Homo sapiens family with sequence similarity 169, member A (FAM169A), transcript variant 1, mRNA [NM_015566]	GO:0005637	NM_015566	Hs.91662	26049	94.1506	196.629	6.46786	7.58161	139.07	67.6485	75.7335	159.884	199.831	230.171	6.99077	6.17929	6.23354	7.2807	7.42155	8.04257
A_33_P3396886	0.00344907	0.377589	2.15322	down	NM_080659	chr11:111797319-111797378	C11orf52	Homo sapiens chromosome 11 open reading frame 52 (C11orf52), mRNA [NM_080659]		NM_080659	Hs.97013	91894	11.4868	24.603	3.50439	4.61088	10.8226	10.5721	13.0658	24.7346	24.0422	25.0323	3.28049	3.5024	3.73029	4.46968	4.50792	4.85505
A_33_P3321230	0.0101934	0.484001	2.15295	down	NM_052831	chr6:133095440-133095381	SLC18B1	Homo sapiens solute carrier family 18, subfamily B, member 1 (SLC18B1), mRNA [NM_052831]	GO:0016021|GO:0055085	NM_052831	Hs.347144	116843	159.567	347.309	7.25644	8.36275	213.634	131.857	133.211	303.734	486.838	251.357	7.58725	7.14295	7.03911	8.20068	8.70962	8.17795
A_33_P3238250	0.00821411	0.456177	2.15268	down	NM_016946	chr1:160968009-160967950	F11R	Homo sapiens F11 receptor (F11R), mRNA [NM_016946]	GO:0005515|GO:0030054|GO:0005886|GO:0034329|GO:0050900|GO:0045216|GO:0006954|GO:0070830|GO:0005911|GO:0007596|GO:0019048|GO:0030855|GO:0007179|GO:0005923|GO:0016021|GO:0007155	NM_016946	Hs.517293	50848	56.2118	124.493	5.7857	6.89184	70.6727	46.748	51.2149	99.4172	176.425	97.638	6.02227	5.65592	5.67893	6.58237	7.24849	6.84465
A_24_P945228	0.0286493	0.585383	2.13992	down	NM_207352	chr4:187133518-187133577	CYP4V2	Homo sapiens cytochrome P450, family 4, subfamily V, polypeptide 2 (CYP4V2), mRNA [NM_207352]	GO:0004497|GO:0010430|GO:0005506|GO:0005789|GO:0016705|GO:0016021|GO:0007601|GO:0050896|GO:0020037	NM_207352	Hs.587231	285440	32.4963	68.3807	4.94271	6.04026	42.5253	19.4739	35.4896	78.8298	81.7181	44.5941	5.2896	4.38862	5.1499	6.24117	6.17897	5.70066
A_33_P3352906	0.0117301	0.496995	2.13912	down	NR_002813	chr4:21845023-21844964	KCNIP4-IT1	Homo sapiens KCNIP4 intronic transcript 1 (non-protein coding) (KCNIP4-IT1), long non-coding RNA [NR_002813]		NR_002813	Hs.354058	359822	15.9445	35.3476	3.97957	5.07658	19.0064	14.1131	14.7138	48.9092	34.4647	22.6689	4.11881	3.9122	3.9077	5.52784	4.99088	4.71103
A_23_P53663	0.0408302	0.617048	2.13712	down	NM_002583	chr12:79990419-79990360	PAWR	Homo sapiens PRKC, apoptosis, WT1, regulator (PAWR), mRNA [NM_002583]	GO:0005515|GO:0043065|GO:0008285|GO:0005886|GO:0003714|GO:0005884|GO:0006915|GO:0030889|GO:0003779|GO:0005634|GO:0000122|GO:0050860|GO:0006351|GO:0042986|GO:0042130|GO:0043522|GO:0042094|GO:0005737|GO:0019899|GO:0051017	NM_002583	Hs.643130	5074	259.672	520.345	7.89009	8.98576	349.894	282.789	146.334	570.012	531.312	459.71	8.2887	8.20658	7.17499	9.10894	8.82631	9.02202
A_24_P206047	0.0102601	0.484805	2.12873	down	NM_001151	chr4:186066313-186066372	SLC25A4	Homo sapiens solute carrier family 25 (mitochondrial carrier; adenine nucleotide translocator), member 4 (SLC25A4), mRNA [NM_001151]	GO:0005515|GO:0005743|GO:0006091|GO:0044281|GO:0005739|GO:0006112|GO:0008637|GO:0050796|GO:0005887|GO:0019048|GO:0006810|GO:0060547|GO:0015207|GO:0016032|GO:0015853	NM_001151	Hs.246506	291	163.506	341.427	7.28725	8.37724	184.551	189.915	116.053	367.515	379.72	277.046	7.38007	7.63702	6.84465	8.47308	8.3478	8.31084
A_33_P3229032	0.0392813	0.61485	2.11531	down	NM_002975	chr19:51228911-51228970	CLEC11A	Homo sapiens C-type lectin domain family 11, member A (CLEC11A), mRNA [NM_002975]	GO:0008284|GO:0005813|GO:0005737|GO:0030246|GO:0005576|GO:0008083	NM_002975	Hs.512680	6320	4159.19	8793.83	11.9191	12.9999	3993.98	2857.35	5626.24	6686.21	12255.3	7439.98	11.829	11.452	12.4763	12.7178	13.3797	12.9024
A_23_P386478	0.00267824	0.362679	2.11156	down	NM_024873	chr4:122053639-122053580	TNIP3	Homo sapiens TNFAIP3 interacting protein 3 (TNIP3), transcript variant 1, mRNA [NM_024873]	GO:0002756|GO:0071222|GO:0034142|GO:0006954|GO:0043124|GO:0031593	NM_024873	Hs.208206	79931	5.12877	11.3472	2.40339	3.48169	5	5.38631	5	13.0656	9.43489	11.5412	2.32271	2.56136	2.32609	3.49629	3.22869	3.72009
A_33_P3340808	0.0422787	0.618136	2.10941	down	XR_159298	chr17:78942377-78942318	FLJ46026	Homo sapiens cDNA FLJ39812 fis, clone SPLEN2009733. [AK097131]		XR_159298	Hs.591201	400627	8.70897	17.482	3.03163	4.10847	12.9648	7.557	5.60514	20.5065	13.2904	18.6491	3.5511	3.02521	2.51856	4.19044	3.70672	4.42825
A_23_P216118	0.0214857	0.565244	2.10773	down	NM_080872	chr8:35651899-35651958	UNC5D	Homo sapiens unc-5 homolog D (C. elegans) (UNC5D), mRNA [NM_080872]	GO:0007165|GO:0009986|GO:0007411|GO:0006915|GO:0016021	NM_080872	Hs.238889	137970	6.4434	13.4103	2.6444	3.72009	7.62778	6.70241	5	11.3027	13.6978	15.2303	2.74948	2.85762	2.32609	3.28049	3.75391	4.12587
A_33_P3363120	0.0227721	0.565244	2.10751	down	NR_004387	chr12:6619658-6619717	SCARNA10	Homo sapiens small Cajal body-specific RNA 10 (SCARNA10), guide RNA [NR_004387]		NR_004387		692148	6.00485	13.3932	2.58816	3.6637	5.84225	5.46102	6.71128	10.7852	18.7692	10.6253	2.42579	2.58264	2.75605	3.20606	4.1815	3.60354
A_33_P3348046	0.000405405	0.27008	2.10407	down		chr1:220109948-220109889							10.4414	21.7786	3.36458	4.43777	12.1529	9.03079	10.1405	24.3896	20.3312	20.615	3.45602	3.28779	3.34994	4.45026	4.28372	4.57933
A_24_P923251	0.0153062	0.531283	2.09145	down	NM_198951	chr20:36766505-36766446	TGM2	Homo sapiens transglutaminase 2 (TGM2), transcript variant 2, mRNA [NM_198951]	GO:0005515|GO:0005886|GO:0019904|GO:0043277|GO:0005525|GO:0048661|GO:0046872|GO:0045785|GO:0005739|GO:0001974|GO:0051482|GO:0003810|GO:0050729|GO:0051260|GO:0018153|GO:0060662|GO:0043123|GO:0060445	NM_198951	Hs.517033	7052	14.2106	29.1258	3.76962	4.83412	18.5309	8.97478	15.126	28.9127	34.5066	23.9582	4.08459	3.27924	3.94503	4.71268	4.99286	4.79682
A_23_P88691	0.0271441	0.579398	2.08762	down	NM_000745	chr15:78885456-78885515	CHRNA5	Homo sapiens cholinergic receptor, nicotinic, alpha 5 (neuronal) (CHRNA5), mRNA [NM_000745]	GO:0035095|GO:0007165|GO:0030054|GO:0005886|GO:0045211|GO:0015464|GO:0006810|GO:0007268|GO:0005892|GO:0004889|GO:0015276	NM_000745	Hs.1614	1138	73.0204	148.526	6.13042	7.19228	83.7101	88.4979	46.8533	137.192	179.092	129.293	6.26255	6.58089	5.54782	7.069	7.27401	7.23383
A_23_P1552	0.0334239	0.599317	2.08102	down	NM_001814	chr11:88042347-88033771	CTSC	Homo sapiens cathepsin C (CTSC), transcript variant 1, mRNA [NM_001814]	GO:0005515|GO:0031404|GO:0005794|GO:0010033|GO:0004252|GO:0005783|GO:0007568|GO:0043621|GO:0005764|GO:0042802|GO:0006955|GO:0001913|GO:0006508|GO:0008234	NM_001814	Hs.128065	1075	299.081	596.425	8.10694	9.16423	350.531	363.898	182.813	547.737	758.621	482.917	8.29001	8.54402	7.48679	9.05676	9.35092	9.08501
A_33_P3392192	0.000981923	0.307017	2.07163	down	AF176921	chr8:32625320-32625379		Homo sapiens MSTP131 (MST131) mRNA, complete cds. [AF176921]			Hs.668810		390.965	792.705	8.54305	9.59382	395.665	349.129	428.1	738.962	834.708	804.446	8.45966	8.4928	8.67668	9.48978	9.49594	9.79573
A_23_P88303	0.0114779	0.496577	2.06453	down	NM_021979	chr14:65009538-65009597	HSPA2	Homo sapiens heat shock 70kDa protein 2 (HSPA2), mRNA [NM_021979]	GO:0005515|GO:0006986|GO:0051861|GO:0000795|GO:0009986|GO:0007286|GO:0036128|GO:0005524|GO:0005739|GO:0070194|GO:0051082|GO:0001673|GO:0031662|GO:0007141|GO:0007140	NM_021979	Hs.432648	3306	84.3937	174.891	6.37196	7.41777	66.2523	85.2257	101.703	157.341	213.055	154.279	5.93227	6.52851	6.6551	7.26056	7.5079	7.48484
A_23_P332260	0.00190203	0.354553	2.06447	down	NM_021635	chr6:138537141-138537123	PBOV1	Homo sapiens prostate and breast cancer overexpressed 1 (PBOV1), mRNA [NM_021635]	GO:0005737|GO:0005634	NM_021635	Hs.302016	59351	11.8035	24.6255	3.53995	4.58573	12.4054	12.6966	10.3085	28.9916	26.2631	18.6219	3.48395	3.76268	3.37323	4.71793	4.61292	4.42632
A_23_P19691	0.0375397	0.608824	2.06337	down	NM_014320	chr6:138726355-138726414	HEBP2	Homo sapiens heme binding protein 2 (HEBP2), mRNA [NM_014320]	GO:0005739|GO:0005737	NM_014320	Hs.486589	23593	134.483	293.214	7.03622	8.08123	161.622	113.591	128.237	177.11	425.713	276.819	7.19039	6.92891	6.98937	7.42728	8.50651	8.30988
A_23_P11968	0.0112533	0.495657	2.06285	down	NM_033553	chr1:42629156-42629097	GUCA2A	Homo sapiens guanylate cyclase activator 2A (guanylin) (GUCA2A), mRNA [NM_033553]	GO:0007165|GO:0030250|GO:0005179|GO:0005576	NM_033553	Hs.778	2980	12.4821	25.5501	3.61134	4.65598	15.8597	11.0891	10.4974	31.9521	20.0864	24.6119	3.85877	3.5699	3.40536	4.86803	4.26893	4.83097
A_32_P84242	0.0450094	0.621204	2.05995	down	NM_015566	chr5:74073811-74073752	FAM169A	Homo sapiens family with sequence similarity 169, member A (FAM169A), transcript variant 1, mRNA [NM_015566]	GO:0005637	NM_015566	Hs.91662	26049	28.4378	58.5322	4.77449	5.8171	40.107	21.55	23.6564	40.5366	72.6687	62.3914	5.1986	4.5312	4.59368	5.23855	6.02744	6.18531
A_24_P106542	0.0216931	0.565244	2.05844	down	NM_032784	chr6:127476517-127476576	RSPO3	Homo sapiens R-spondin 3 (RSPO3), mRNA [NM_032784]	GO:0005109|GO:0060670|GO:0005102|GO:0005576|GO:0060070|GO:0008201	NM_032784	Hs.135254	84870	13.2343	27.8954	3.70981	4.75137	13.1856	11.27	15.2475	21.3692	33.2656	29.0514	3.57791	3.5936	3.95793	4.24415	4.93748	5.07247
A_33_P3307337	0.0237295	0.565244	2.05408	down	NM_002747	chr18:48258062-48258121	MAPK4	Homo sapiens mitogen-activated protein kinase 4 (MAPK4), mRNA [NM_002747]	GO:0005515|GO:0007049|GO:0005737|GO:0046982|GO:0019901|GO:0000165|GO:0006468|GO:0005634|GO:0005524|GO:0042803|GO:0004707	NM_002747	Hs.433728	5596	5.22213	11.6305	2.42691	3.4654	5	5.66639	5	17.0411	7.67411	10.1764	2.32271	2.63192	2.32609	3.89868	2.95904	3.53847
A_33_P3360972	0.000420097	0.27008	2.04535	down	NM_001077594	chr14:103576830-103576889	EXOC3L4	Homo sapiens exocyst complex component 3-like 4 (EXOC3L4), mRNA [NM_001077594]	GO:0000145|GO:0006887	NM_001077594	Hs.37712	91828	8.53023	17.2198	3.06013	4.09248	9.31606	7.12107	9.15357	20.3324	16.1018	15.2251	3.04792	2.93942	3.19305	4.17867	3.97353	4.12523
A_33_P3334205	0.0302622	0.592425	2.04192	down	NM_001097620	chr7:1585889-1585830	TMEM184A	Homo sapiens transmembrane protein 184A (TMEM184A), mRNA [NM_001097620]	GO:0016021	NM_001097620	Hs.592174	202915	13.114	28.3413	3.70158	4.73151	12.303	12.4926	14.5464	41.3373	26.8353	16.8514	3.47487	3.73936	3.89052	5.27036	4.64168	4.28248
A_24_P245379	0.0304116	0.592425	2.04187	down	NM_002575	chr18:61570202-61570261	SERPINB2	Homo sapiens serpin peptidase inhibitor, clade B (ovalbumin), member 2 (SERPINB2), transcript variant 2, mRNA [NM_002575]	GO:0030162|GO:0010951|GO:0043066|GO:0005737|GO:0005886|GO:0007596|GO:0004867|GO:0005576|GO:0042730|GO:0005615	NM_002575	Hs.594481	5055	5.80863	12.6558	2.57268	3.60257	5	6.93022	5.49566	10.1666	16.6208	11.18	2.32271	2.90342	2.49192	3.11607	4.01464	3.677
A_23_P120227	0.0360912	0.605154	2.04168	down	NM_030915	chr2:30482471-30482530	LBH	Homo sapiens limb bud and heart development (LBH), mRNA [NM_030915]	GO:0005737|GO:0005730|GO:0007275|GO:0045893|GO:0006351|GO:0043231	NM_030915	Hs.567598	81606	922.514	1973.37	9.78487	10.8146	909.436	864.606	993.501	1187.26	2844.16	1888.69	9.67085	9.76948	9.91429	10.1907	11.2791	10.9741
A_33_P3772150	0.0044124	0.394218	2.03891	down	NM_018702	chr10:1223601-1223542	ADARB2	Homo sapiens adenosine deaminase, RNA-specific, B2 (non-functional) (ADARB2), mRNA [NM_018702]	GO:0006397|GO:0005739|GO:0003725|GO:0005737|GO:0003727|GO:0004000|GO:0005730|GO:0005634|GO:0046872	NM_018702	Hs.586663	105	11.7059	24.0182	3.52469	4.55249	11.6422	9.39735	14.0782	27.7719	26.1397	18.143	3.38809	3.34543	3.84054	4.65416	4.60836	4.39494
A_33_P3378318	0.0449383	0.621146	2.03099	down		chr10:043050905-043050964							11.7362	23.3188	3.4963	4.51848	14.6703	7.58252	12.9557	21.0292	20.3307	28.5964	3.74032	3.03059	3.71798	4.21981	4.28338	5.05225
A_24_P291658	0.0198332	0.553763	2.03093	down	NM_000667	chr4:100200647-100200588	ADH1A	Homo sapiens alcohol dehydrogenase 1A (class I), alpha polypeptide (ADH1A), mRNA [NM_000667]	GO:0005515|GO:0004022|GO:0006805|GO:0017144|GO:0006066|GO:0006069|GO:0004024|GO:0008270|GO:0044281|GO:0005829	NM_000667	Hs.654433	124	5	10.7055	2.32668	3.34883	5	5	5	8.77821	14.4232	8.91513	2.32271	2.33126	2.32609	2.88237	3.82474	3.33937
A_23_P42718	0.0137125	0.514782	2.02715	down	NM_004289	chr7:26225697-26225756	NFE2L3	Homo sapiens nuclear factor, erythroid 2-like 3 (NFE2L3), mRNA [NM_004289]	GO:0043565|GO:0003700|GO:0006366|GO:0003713|GO:0005634	NM_004289	Hs.404741	9603	382.863	753.053	8.4954	9.51485	369.566	477.907	301.116	687.842	820.731	750.586	8.36743	8.93276	8.18601	9.38479	9.4681	9.69167
A_23_P259071	0.0293213	0.587944	2.02618	down	NM_001657	chr4:75320518-75320577	AREG	Homo sapiens amphiregulin (AREG), mRNA [NM_001657]		NM_001657	Hs.270833	374	9.0067	18.5034	3.15122	4.16998	9.43438	9.20891	8.3768	22.0565	12.4577	20.9961	3.06662	3.31598	3.07106	4.29784	3.60656	4.60556
A_23_P44207	0.00490107	0.408846	2.02479	down	NM_130767	chr5:80626341-80626282	ACOT12	Homo sapiens acyl-CoA thioesterase 12 (ACOT12), mRNA [NM_130767]	GO:0006637|GO:0006090|GO:0006631|GO:0003986|GO:0006084|GO:0005524|GO:0008289|GO:0005829	NM_130767	Hs.591756	134526	7.65622	15.6828	2.9016	3.91937	8.88757	6.003	8.07807	17.4369	18.6243	10.9872	2.97831	2.70158	3.0249	3.93419	4.17153	3.65239
A_23_P110212	0.00591262	0.421984	2.02378	down	NM_001995	chr4:185676745-185676732	ACSL1	Homo sapiens acyl-CoA synthetase long-chain family member 1 (ACSL1), transcript variant 1, mRNA [NM_001995]	GO:0014070|GO:0001676|GO:0005886|GO:0071902|GO:0033211|GO:0005741|GO:0035338|GO:0044281|GO:0005739|GO:0019432|GO:0044539|GO:0005778|GO:0044255|GO:0008610|GO:0007584|GO:0042178|GO:0042493|GO:0034201|GO:0036109|GO:0005524|GO:0004467|GO:0033559|GO:0043651|GO:0005789|GO:0016021	NM_001995	Hs.406678	2180	49.7166	104.496	5.62214	6.63919	54.7928	49.721	44.636	102.319	141.238	69.9308	5.64867	5.73738	5.48037	6.62156	6.95036	6.34565
A_23_P43810	0.0261712	0.576977	2.02189	down	NM_206943	chr2:33623836-33623895	LTBP1	Homo sapiens latent transforming growth factor beta binding protein 1 (LTBP1), transcript variant 1, mRNA [NM_206943]	GO:0031012|GO:0005515|GO:0035583|GO:0019838|GO:0030198|GO:0005509|GO:0005578|GO:0005024|GO:0005576	NM_206943	Hs.619315	4052	29.1313	62.1002	4.83272	5.84843	37.8686	25.1914	24.334	62.8216	87.1804	36.2985	5.11596	4.75007	4.63213	5.89399	6.26788	5.38342
A_23_P67339	0.0374467	0.608824	2.01681	down	NM_020650	chr19:50045997-50046409	RCN3	Homo sapiens reticulocalbin 3, EF-hand calcium binding domain (RCN3), mRNA [NM_020650]	GO:0005515|GO:0005509|GO:0005788	NM_020650	Hs.567550	57333	76.7749	160.586	6.22847	7.24055	95.7175	60.4483	74.159	103.038	217.929	160.792	6.46229	6.01932	6.20381	6.63236	7.54304	7.54624
A_24_P76675	0.0233124	0.565244	2.01425	down	NM_021647	chr4:170926890-170926831	MFAP3L	Homo sapiens microfibrillar-associated protein 3-like (MFAP3L), transcript variant 1, mRNA [NM_021647]	GO:0005886|GO:0016021	NM_021647	Hs.593942	9848	19.4834	39.4817	4.24783	5.25807	25.5	15.9016	17.0486	30.4681	46.3885	41.5883	4.53614	4.08459	4.12275	4.7873	5.38906	5.59785
A_32_P515971	0.000152824	0.19259	2.01335	down	NM_173503	chr17:60484392-60484451	EFCAB3	Homo sapiens EF-hand calcium binding domain 3 (EFCAB3), transcript variant 2, mRNA [NM_173503]	GO:0005509	NM_173503	Hs.152670	146779	5	10.2541	2.32668	3.33628	5	5	5	10.8396	10.236	9.68657	2.32271	2.33126	2.32609	3.21359	3.33139	3.46387
A_24_P80338	0.0342197	0.59935	2.00798	down	NM_003157	chr3:52744873-52744814	NEK4	Homo sapiens NIMA-related kinase 4 (NEK4), transcript variant 1, mRNA [NM_003157]	GO:0007067|GO:0004674|GO:0005730|GO:0006468|GO:0005634|GO:0005524|GO:0046872|GO:0051301	NM_003157	Hs.631921	6787	391.685	794.587	8.54955	9.55529	387.184	428.26	359.611	601.417	745.436	1036.91	8.43398	8.77815	8.4365	9.19378	9.32753	10.1446
A_33_P3260426	0.00164902	0.349948	2.00719	down	NM_005988	chr1:153028985-153028926	SPRR2A	Homo sapiens small proline-rich protein 2A (SPRR2A), mRNA [NM_005988]	GO:0005515|GO:0005737|GO:0008544|GO:0030216|GO:0031424|GO:0001533	NM_005988	Hs.355542	6700	9.33022	18.6024	3.19425	4.19943	10.376	7.67096	9.94367	18.0175	20.6619	17.1278	3.21503	3.04968	3.31804	3.98387	4.30708	4.30734
